# Supplementary material for: New records and detailed distribution and abundance of selected arthropod species collected between 1999 and 2011 in Azorean native forests
Source: Biodivers Data J. 2016 Dec 22;(4):e10948. doi: 10.3897/BDJ.4.e10948 (PMC5267528; doi:10.3897/BDJ.4.e10948)
Supplement: Supplementary material 1 — Appendix 1 - Detailed data on the distribution and abundance of the studied species [file biodiversity_data_journal-4-e10948-s001.xlsx]

## Sheet: Sheet1
Code	Fragment name	Site name	Site code	Grid zone	UTM E	UTM N	Project	Year	Month	Solution/plant	Sample code	MF	Species	Genus	sp	ssp	Author	Family	Order (new)	Class	Colonization Status	Endemism Status	Trophic	AM/AF	AM	AF	J	A/J	Total	Adults
FAI-CG-T-01_PT-ET-S20	NFF Cabeço do Fogo	Erical	FAI-CG-T-01	26S	345906	4272298	BALA	1999	September	Ethylene	PT-ET-S20	159	Acalypta parvula (Fallén)	Acalypta	parvula		(Fallén, 1807)	Tingidae	Hemiptera	Insecta	N		H	1	0	0	0	0	1	1
FAI-CG-T-01_PT-ET-S28	NFF Cabeço do Fogo	Erical	FAI-CG-T-01	26S	345906	4272298	BALA	1999	September	Ethylene	PT-ET-S28	159	Acalypta parvula (Fallén)	Acalypta	parvula		(Fallén, 1807)	Tingidae	Hemiptera	Insecta	N		H	1	0	0	0	0	1	1
FLO-FR-T-06_PT-TU-S03	NFF Caldeiras Funda e Rasa	Juniperal	FLO-FR-T-06	25S	136738	4370215	BALA	1999	July	Turquin	PT-TU-S03	159	Acalypta parvula (Fallén)	Acalypta	parvula		(Fallén, 1807)	Tingidae	Hemiptera	Insecta	N		H	0	0	0	1	0	1	0
FLO-FR-T-07_PT-TU-S21	NFF Caldeiras Funda e Rasa	Encosta Caldeira Funda	FLO-FR-T-07	25S	136817	4370019	BALA2	2010	July	Turquin	PT-TU-S21	159	Acalypta parvula (Fallén)	Acalypta	parvula		(Fallén, 1807)	Tingidae	Hemiptera	Insecta	N		H	1	0	0	0	0	1	1
FLO-FR-T-13_PT-TU-S17	NFF Caldeiras Funda e Rasa	Erical	FLO-FR-T-13	25S	137605	4370363	BALA	2000	September	Turquin	PT-TU-S17	159	Acalypta parvula (Fallén)	Acalypta	parvula		(Fallén, 1807)	Tingidae	Hemiptera	Insecta	N		H	0	0	0	1	0	1	0
FLO-MA-T-03_PT-TU-S25	NFF Morro Alto e Pico da Sé	Caldeira Branca margem ribeira	FLO-MA-T-03	25S	136183	4374629	BALA	1999	July	Turquin	PT-TU-S25	159	Acalypta parvula (Fallén)	Acalypta	parvula		(Fallén, 1807)	Tingidae	Hemiptera	Insecta	N		H	1	0	0	0	0	1	1
FLO-MA-T-05_PT-TU-S01	NFF Morro Alto e Pico da Sé	Encosta Caldeira Branca	FLO-MA-T-05	25S	137340	4375246	BALA	1999	July	Turquin	PT-TU-S01	159	Acalypta parvula (Fallén)	Acalypta	parvula		(Fallén, 1807)	Tingidae	Hemiptera	Insecta	N		H	0	0	0	3	0	3	0
FLO-MA-T-05_PT-TU-S23	NFF Morro Alto e Pico da Sé	Encosta Caldeira Branca	FLO-MA-T-05	25S	137340	4375246	BALA	1999	July	Turquin	PT-TU-S23	159	Acalypta parvula (Fallén)	Acalypta	parvula		(Fallén, 1807)	Tingidae	Hemiptera	Insecta	N		H	1	0	0	0	0	1	1
FLO-MA-T-05_PT-TU-S19	NFF Morro Alto e Pico da Sé	Encosta Caldeira Branca	FLO-MA-T-05	25S	137340	4375246	BALA	1999	July	Turquin	PT-TU-S19	159	Acalypta parvula (Fallén)	Acalypta	parvula		(Fallén, 1807)	Tingidae	Hemiptera	Insecta	N		H	0	0	0	1	0	1	0
SJG-PP-T-02_PT-ET-S06	NFF Pico Pinheiro	Pinheiro juniperal	SJG-PP-T-02	26S	408586	4278492	BALA2	2010	September	Ethylene	PT-ET-S06	159	Acalypta parvula (Fallén)	Acalypta	parvula		(Fallén, 1807)	Tingidae	Hemiptera	Insecta	N		H	1	0	0	0	0	1	1
TER-GM-TY35_PT-TU-S25	NFF Caldeira Guilherme Moniz	GM direita entrada	TER-GM-TY35	26S	481290	4284785	PhD Clara	2003	September	Turquin	PT-TU-S25	159	Acalypta parvula (Fallén)	Acalypta	parvula		(Fallén, 1807)	Tingidae	Hemiptera	Insecta	N		H	0	0	0	0	1	1	0
PIC-CA-T-21_B-LA-S10	NFF Caveiro	Caveiro morro	PIC-CA-T-21	26S	394055	4255376	BALA	2000	July	Laurus	B-LA-S10	662	Acizzia uncatoides (Ferris & Klyver)	Acizzia	uncatoides		(Ferris & Klyver, 1932)	Psyllidae	Hemiptera	Insecta	I		H	1	0	0	0	0	1	1
PIC-MP-T-01_B-JU-S09	NFF Mistério da Prainha	Chão Verde superior	PIC-MP-T-01	26S	388838	4259774	BALA2	2010	July	Juniperus	B-JU-S09	662	Acizzia uncatoides (Ferris & Klyver)	Acizzia	uncatoides		(Ferris & Klyver, 1932)	Psyllidae	Hemiptera	Insecta	I		H	1	0	0	0	0	1	1
PIC-MP-T-10_B-ER-S07	NFF Mistério da Prainha	Mistério esq esq	PIC-MP-T-10	26S	388683	4257957	BALA2	2010	july	Erica	B-ER-S07	662	Acizzia uncatoides (Ferris & Klyver)	Acizzia	uncatoides		(Ferris & Klyver, 1932)	Psyllidae	Hemiptera	Insecta	I		H	1	0	0	0	0	1	1
TER-BF-T-38_B-ER-S06	NFF Biscoito da Ferraria	Labaçal erical	TER-BF-T-38	26S	480778	4290662	PhD Clara	2003	July	Erica	B-ER-S06	662	Acizzia uncatoides (Ferris & Klyver)	Acizzia	uncatoides		(Ferris & Klyver, 1932)	Psyllidae	Hemiptera	Insecta	I		H	1	0	0	0	0	1	1
TER-BF-TY01_B-LA-S10	NFF Biscoito da Ferraria	Labaçal T2 Clara	TER-BF-TY01	26S	480849	4290312	PhD Clara	2003	June	Laurus	B-LA-S10	662	Acizzia uncatoides (Ferris & Klyver)	Acizzia	uncatoides		(Ferris & Klyver, 1932)	Psyllidae	Hemiptera	Insecta	I		H	1	0	0	0	0	1	1
TER-BF-TY01_B-ER-S04	NFF Biscoito da Ferraria	Labaçal T2 Clara	TER-BF-TY01	26S	480849	4290312	PhD Clara	2003	June	Erica	B-ER-S04	662	Acizzia uncatoides (Ferris & Klyver)	Acizzia	uncatoides		(Ferris & Klyver, 1932)	Psyllidae	Hemiptera	Insecta	I		H	1	0	0	0	0	1	1
FAI-CF-T-08_B-VA-S05	NFF Caldeira do Faial	Fora trilho Caldeira	FAI-CF-T-08	26S	350801	4271693	PhD Clara	2004	July	Vaccinium	B-VA-S05	312	Acorigone acoreensis (Wunderlich)	Acorigone	acoreensis		(Wunderlich, 1992)	Linyphiidae	Araneae	Arachnida	E	A_END	P	0	1	0	0	0	1	1
FAI-CF-T-08_B-JU-S07	NFF Caldeira do Faial	Fora trilho Caldeira	FAI-CF-T-08	26S	350801	4271693	PhD Clara	2004	July	Juniperus	B-JU-S07	312	Acorigone acoreensis (Wunderlich)	Acorigone	acoreensis		(Wunderlich, 1992)	Linyphiidae	Araneae	Arachnida	E	A_END	P	0	0	0	1	0	1	0
FAI-CF-T-08_B-JU-S03	NFF Caldeira do Faial	Fora trilho Caldeira	FAI-CF-T-08	26S	350801	4271693	PhD Clara	2004	July	Juniperus	B-JU-S03	312	Acorigone acoreensis (Wunderlich)	Acorigone	acoreensis		(Wunderlich, 1992)	Linyphiidae	Araneae	Arachnida	E	A_END	P	0	0	0	1	0	1	0
FAI-CF-T-08_B-JU-S01	NFF Caldeira do Faial	Fora trilho Caldeira	FAI-CF-T-08	26S	350801	4271693	PhD Clara	2004	July	Juniperus	B-JU-S01	312	Acorigone acoreensis (Wunderlich)	Acorigone	acoreensis		(Wunderlich, 1992)	Linyphiidae	Araneae	Arachnida	E	A_END	P	0	0	0	1	0	1	0
FAI-CF-T-08_B-JU-S09	NFF Caldeira do Faial	Fora trilho Caldeira	FAI-CF-T-08	26S	350801	4271693	PhD Clara	2004	July	Juniperus	B-JU-S09	312	Acorigone acoreensis (Wunderlich)	Acorigone	acoreensis		(Wunderlich, 1992)	Linyphiidae	Araneae	Arachnida	E	A_END	P	0	0	1	1	0	2	1
FAI-CF-T-09_B-ER-S01	NFF Caldeira do Faial	Trilho Caldeira superior	FAI-CF-T-09	26S	351349	4271682	PhD Clara	2004	July	Erica	B-ER-S01	312	Acorigone acoreensis (Wunderlich)	Acorigone	acoreensis		(Wunderlich, 1992)	Linyphiidae	Araneae	Arachnida	E	A_END	P	0	0	1	0	0	1	1
FAI-CF-T-10_B-IL-S05	NFF Caldeira do Faial	Trilho Caldeira inferior	FAI-CF-T-10	26S	351110	4271917	BALA2	2010	September	Ilex	B-IL-S05	312	Acorigone acoreensis (Wunderlich)	Acorigone	acoreensis		(Wunderlich, 1992)	Linyphiidae	Araneae	Arachnida	E	A_END	P	0	1	0	0	0	1	1
FAI-CF-T-10_B-JU-S06	NFF Caldeira do Faial	Trilho Caldeira inferior	FAI-CF-T-10	26S	351110	4271917	BALA2	2010	September	Juniperus	B-JU-S06	312	Acorigone acoreensis (Wunderlich)	Acorigone	acoreensis		(Wunderlich, 1992)	Linyphiidae	Araneae	Arachnida	E	A_END	P	0	0	0	1	0	1	0
FAI-CF-T-10_B-JU-S08	NFF Caldeira do Faial	Trilho Caldeira inferior	FAI-CF-T-10	26S	351110	4271917	BALA2	2010	September	Juniperus	B-JU-S08	312	Acorigone acoreensis (Wunderlich)	Acorigone	acoreensis		(Wunderlich, 1992)	Linyphiidae	Araneae	Arachnida	E	A_END	P	0	1	4	10	0	15	5
FAI-CF-T-10_B-JU-S09	NFF Caldeira do Faial	Trilho Caldeira inferior	FAI-CF-T-10	26S	351110	4271917	BALA2	2010	September	Juniperus	B-JU-S09	312	Acorigone acoreensis (Wunderlich)	Acorigone	acoreensis		(Wunderlich, 1992)	Linyphiidae	Araneae	Arachnida	E	A_END	P	0	0	0	1	0	1	0
FLO-FR-T-12_PT-ET-S16	NFF Caldeiras Funda e Rasa	Encosta Erical	FLO-FR-T-12	25S	137301	4371286	BALA	2000	September	Ethylene	PT-ET-S16	312	Acorigone acoreensis (Wunderlich)	Acorigone	acoreensis		(Wunderlich, 1992)	Linyphiidae	Araneae	Arachnida	E	A_END	P	0	0	1	0	0	1	1
FLO-FR-T-13_B-ER-S02	NFF Caldeiras Funda e Rasa	Erical	FLO-FR-T-13	25S	137605	4370363	BALA	2000	September	Erica	B-ER-S02	312	Acorigone acoreensis (Wunderlich)	Acorigone	acoreensis		(Wunderlich, 1992)	Linyphiidae	Araneae	Arachnida	E	A_END	P	0	0	0	1	0	1	0
FLO-FR-T-13_PT-ET-S06	NFF Caldeiras Funda e Rasa	Erical	FLO-FR-T-13	25S	137605	4370363	BALA	2000	September	Ethylene	PT-ET-S06	312	Acorigone acoreensis (Wunderlich)	Acorigone	acoreensis		(Wunderlich, 1992)	Linyphiidae	Araneae	Arachnida	E	A_END	P	0	0	1	0	0	1	1
FLO-FR-T-13_PT-TU-S23	NFF Caldeiras Funda e Rasa	Erical	FLO-FR-T-13	25S	137605	4370363	BALA	2000	September	Turquin	PT-TU-S23	312	Acorigone acoreensis (Wunderlich)	Acorigone	acoreensis		(Wunderlich, 1992)	Linyphiidae	Araneae	Arachnida	E	A_END	P	0	0	1	0	0	1	1
FLO-MA-T-04_B-JU-S01	NFF Morro Alto e Pico da Sé	Ribeira da Fazenda	FLO-MA-T-04	25S	138309	4377246	BALA	1999	July	Juniperus	B-JU-S01	312	Acorigone acoreensis (Wunderlich)	Acorigone	acoreensis		(Wunderlich, 1992)	Linyphiidae	Araneae	Arachnida	E	A_END	P	0	0	0	1	0	1	0
FLO-MA-T-08_B-JU-S05	NFF Morro Alto e Pico da Sé	Morro Alto Este	FLO-MA-T-08	25S	137809	4376293	BALA	1999	July	Juniperus	B-JU-S05	312	Acorigone acoreensis (Wunderlich)	Acorigone	acoreensis		(Wunderlich, 1992)	Linyphiidae	Araneae	Arachnida	E	A_END	P	0	1	2	3	0	6	3
FLO-MA-T-08_PT-TU-S01	NFF Morro Alto e Pico da Sé	Morro Alto Este	FLO-MA-T-08	25S	137809	4376293	BALA	1999	July	Turquin	PT-TU-S01	312	Acorigone acoreensis (Wunderlich)	Acorigone	acoreensis		(Wunderlich, 1992)	Linyphiidae	Araneae	Arachnida	E	A_END	P	0	1	0	0	0	1	1
FLO-MA-T-08_B-JU-S08	NFF Morro Alto e Pico da Sé	Morro Alto Este	FLO-MA-T-08	25S	137809	4376293	BALA2	2010	July	Juniperus	B-JU-S08	312	Acorigone acoreensis (Wunderlich)	Acorigone	acoreensis		(Wunderlich, 1992)	Linyphiidae	Araneae	Arachnida	E	A_END	P	0	1	1	0	0	2	2
PIC-CA-T-08_B-MS-S01	NFF Caveiro	Picos do Caveiro	PIC-CA-T-08	26S	395274	4255409	BALA	1999	September	Myrsine	B-MS-S01	312	Acorigone acoreensis (Wunderlich)	Acorigone	acoreensis		(Wunderlich, 1992)	Linyphiidae	Araneae	Arachnida	E	A_END	P	0	1	1	1	0	3	2
PIC-CA-T-08_B-MS-S04	NFF Caveiro	Picos do Caveiro	PIC-CA-T-08	26S	395274	4255409	BALA	1999	September	Myrsine	B-MS-S04	312	Acorigone acoreensis (Wunderlich)	Acorigone	acoreensis		(Wunderlich, 1992)	Linyphiidae	Araneae	Arachnida	E	A_END	P	0	0	0	1	0	1	0
PIC-CA-T-08_B-JU-S03	NFF Caveiro	Picos do Caveiro	PIC-CA-T-08	26S	395274	4255409	BALA	1999	September	Juniperus	B-JU-S03	312	Acorigone acoreensis (Wunderlich)	Acorigone	acoreensis		(Wunderlich, 1992)	Linyphiidae	Araneae	Arachnida	E	A_END	P	0	0	1	0	0	1	1
PIC-CA-T-08_B-JU-S04	NFF Caveiro	Picos do Caveiro	PIC-CA-T-08	26S	395274	4255409	BALA	1999	September	Juniperus	B-JU-S04	312	Acorigone acoreensis (Wunderlich)	Acorigone	acoreensis		(Wunderlich, 1992)	Linyphiidae	Araneae	Arachnida	E	A_END	P	0	1	0	3	0	4	1
PIC-CA-T-08_B-JU-S08	NFF Caveiro	Picos do Caveiro	PIC-CA-T-08	26S	395274	4255409	BALA	1999	September	Juniperus	B-JU-S08	312	Acorigone acoreensis (Wunderlich)	Acorigone	acoreensis		(Wunderlich, 1992)	Linyphiidae	Araneae	Arachnida	E	A_END	P	0	0	1	0	0	1	1
PIC-CA-T-08_B-JU-S09	NFF Caveiro	Picos do Caveiro	PIC-CA-T-08	26S	395274	4255409	BALA	1999	September	Juniperus	B-JU-S09	312	Acorigone acoreensis (Wunderlich)	Acorigone	acoreensis		(Wunderlich, 1992)	Linyphiidae	Araneae	Arachnida	E	A_END	P	0	0	1	0	0	1	1
PIC-CA-T-08_B-JU-S10	NFF Caveiro	Picos do Caveiro	PIC-CA-T-08	26S	395274	4255409	BALA	1999	September	Juniperus	B-JU-S10	312	Acorigone acoreensis (Wunderlich)	Acorigone	acoreensis		(Wunderlich, 1992)	Linyphiidae	Araneae	Arachnida	E	A_END	P	0	0	1	0	0	1	1
PIC-CA-T-08_B-IL-S01	NFF Caveiro	Picos do Caveiro	PIC-CA-T-08	26S	395274	4255409	BALA	1999	September	Ilex	B-IL-S01	312	Acorigone acoreensis (Wunderlich)	Acorigone	acoreensis		(Wunderlich, 1992)	Linyphiidae	Araneae	Arachnida	E	A_END	P	0	0	1	0	0	1	1
PIC-CA-T-08_B-IL-S02	NFF Caveiro	Picos do Caveiro	PIC-CA-T-08	26S	395274	4255409	BALA	1999	September	Ilex	B-IL-S02	312	Acorigone acoreensis (Wunderlich)	Acorigone	acoreensis		(Wunderlich, 1992)	Linyphiidae	Araneae	Arachnida	E	A_END	P	0	0	1	0	0	1	1
PIC-CA-T-08_B-IL-S03	NFF Caveiro	Picos do Caveiro	PIC-CA-T-08	26S	395274	4255409	BALA	1999	September	Ilex	B-IL-S03	312	Acorigone acoreensis (Wunderlich)	Acorigone	acoreensis		(Wunderlich, 1992)	Linyphiidae	Araneae	Arachnida	E	A_END	P	0	0	1	0	0	1	1
PIC-CA-T-08_B-IL-S06	NFF Caveiro	Picos do Caveiro	PIC-CA-T-08	26S	395274	4255409	BALA	1999	September	Ilex	B-IL-S06	312	Acorigone acoreensis (Wunderlich)	Acorigone	acoreensis		(Wunderlich, 1992)	Linyphiidae	Araneae	Arachnida	E	A_END	P	0	0	0	1	0	1	0
PIC-CA-T-08_B-IL-S07	NFF Caveiro	Picos do Caveiro	PIC-CA-T-08	26S	395274	4255409	BALA	1999	September	Ilex	B-IL-S07	312	Acorigone acoreensis (Wunderlich)	Acorigone	acoreensis		(Wunderlich, 1992)	Linyphiidae	Araneae	Arachnida	E	A_END	P	0	1	0	0	0	1	1
PIC-CA-T-08_B-IL-S09	NFF Caveiro	Picos do Caveiro	PIC-CA-T-08	26S	395274	4255409	BALA2	2010	july	Ilex	B-IL-S09	312	Acorigone acoreensis (Wunderlich)	Acorigone	acoreensis		(Wunderlich, 1992)	Linyphiidae	Araneae	Arachnida	E	A_END	P	0	0	1	0	0	1	1
PIC-CA-T-09_B-JU-S07	NFF Caveiro	Caveiro base	PIC-CA-T-09	26S	394341	4255080	BALA	1999	September	Juniperus	B-JU-S07	312	Acorigone acoreensis (Wunderlich)	Acorigone	acoreensis		(Wunderlich, 1992)	Linyphiidae	Araneae	Arachnida	E	A_END	P	0	0	1	0	0	1	1
PIC-CA-T-09_B-JU-S04	NFF Caveiro	Caveiro base	PIC-CA-T-09	26S	394341	4255080	BALA	1999	September	Juniperus	B-JU-S04	312	Acorigone acoreensis (Wunderlich)	Acorigone	acoreensis		(Wunderlich, 1992)	Linyphiidae	Araneae	Arachnida	E	A_END	P	0	0	1	0	0	1	1
PIC-CA-T-09_B-LA-S07	NFF Caveiro	Caveiro base	PIC-CA-T-09	26S	394341	4255080	BALA	1999	September	Laurus	B-LA-S07	312	Acorigone acoreensis (Wunderlich)	Acorigone	acoreensis		(Wunderlich, 1992)	Linyphiidae	Araneae	Arachnida	E	A_END	P	0	0	1	0	0	1	1
PIC-CA-T-09_B-IL-S03	NFF Caveiro	Caveiro base	PIC-CA-T-09	26S	394341	4255080	BALA	1999	September	Ilex	B-IL-S03	312	Acorigone acoreensis (Wunderlich)	Acorigone	acoreensis		(Wunderlich, 1992)	Linyphiidae	Araneae	Arachnida	E	A_END	P	0	0	0	1	0	1	0
PIC-CA-T-09_B-IL-S04	NFF Caveiro	Caveiro base	PIC-CA-T-09	26S	394341	4255080	BALA	1999	September	Ilex	B-IL-S04	312	Acorigone acoreensis (Wunderlich)	Acorigone	acoreensis		(Wunderlich, 1992)	Linyphiidae	Araneae	Arachnida	E	A_END	P	0	0	0	1	0	1	0
PIC-CA-T-09_B-IL-S08	NFF Caveiro	Caveiro base	PIC-CA-T-09	26S	394341	4255080	BALA	1999	September	Ilex	B-IL-S08	312	Acorigone acoreensis (Wunderlich)	Acorigone	acoreensis		(Wunderlich, 1992)	Linyphiidae	Araneae	Arachnida	E	A_END	P	0	0	0	1	0	1	0
PIC-CA-T-09_B-JU-S01	NFF Caveiro	Caveiro base	PIC-CA-T-09	26S	394341	4255080	BALA2	2010	july	Juniperus	B-JU-S01	312	Acorigone acoreensis (Wunderlich)	Acorigone	acoreensis		(Wunderlich, 1992)	Linyphiidae	Araneae	Arachnida	E	A_END	P	1	0	0	0	0	1	1
PIC-CA-T-21_B-JU-S02	NFF Caveiro	Caveiro morro	PIC-CA-T-21	26S	394055	4255376	BALA	2000	July	Juniperus	B-JU-S02	312	Acorigone acoreensis (Wunderlich)	Acorigone	acoreensis		(Wunderlich, 1992)	Linyphiidae	Araneae	Arachnida	E	A_END	P	0	0	2	1	0	3	2
PIC-CA-T-21_B-JU-S06	NFF Caveiro	Caveiro morro	PIC-CA-T-21	26S	394055	4255376	BALA	2000	July	Juniperus	B-JU-S06	312	Acorigone acoreensis (Wunderlich)	Acorigone	acoreensis		(Wunderlich, 1992)	Linyphiidae	Araneae	Arachnida	E	A_END	P	0	0	1	0	0	1	1
PIC-CA-T-21_B-JU-S08	NFF Caveiro	Caveiro morro	PIC-CA-T-21	26S	394055	4255376	BALA	2000	July	Juniperus	B-JU-S08	312	Acorigone acoreensis (Wunderlich)	Acorigone	acoreensis		(Wunderlich, 1992)	Linyphiidae	Araneae	Arachnida	E	A_END	P	0	4	7	7	0	18	11
PIC-CA-T-21_B-JU-S09	NFF Caveiro	Caveiro morro	PIC-CA-T-21	26S	394055	4255376	BALA	2000	July	Juniperus	B-JU-S09	312	Acorigone acoreensis (Wunderlich)	Acorigone	acoreensis		(Wunderlich, 1992)	Linyphiidae	Araneae	Arachnida	E	A_END	P	0	2	5	6	0	13	7
PIC-CA-T-21_B-JU-S10	NFF Caveiro	Caveiro morro	PIC-CA-T-21	26S	394055	4255376	BALA	2000	July	Juniperus	B-JU-S10	312	Acorigone acoreensis (Wunderlich)	Acorigone	acoreensis		(Wunderlich, 1992)	Linyphiidae	Araneae	Arachnida	E	A_END	P	0	0	1	0	0	1	1
PIC-CA-T-21_B-IL-S03	NFF Caveiro	Caveiro morro	PIC-CA-T-21	26S	394055	4255376	BALA	2000	July	Ilex	B-IL-S03	312	Acorigone acoreensis (Wunderlich)	Acorigone	acoreensis		(Wunderlich, 1992)	Linyphiidae	Araneae	Arachnida	E	A_END	P	0	1	2	4	0	7	3
PIC-CA-T-21_B-IL-S04	NFF Caveiro	Caveiro morro	PIC-CA-T-21	26S	394055	4255376	BALA	2000	July	Ilex	B-IL-S04	312	Acorigone acoreensis (Wunderlich)	Acorigone	acoreensis		(Wunderlich, 1992)	Linyphiidae	Araneae	Arachnida	E	A_END	P	0	2	5	1	0	8	7
PIC-CA-T-21_B-IL-S09	NFF Caveiro	Caveiro morro	PIC-CA-T-21	26S	394055	4255376	BALA	2000	July	Ilex	B-IL-S09	312	Acorigone acoreensis (Wunderlich)	Acorigone	acoreensis		(Wunderlich, 1992)	Linyphiidae	Araneae	Arachnida	E	A_END	P	0	0	2	5	0	7	2
PIC-CA-T-21_B-IL-S10	NFF Caveiro	Caveiro morro	PIC-CA-T-21	26S	394055	4255376	BALA	2000	July	Ilex	B-IL-S10	312	Acorigone acoreensis (Wunderlich)	Acorigone	acoreensis		(Wunderlich, 1992)	Linyphiidae	Araneae	Arachnida	E	A_END	P	0	0	6	5	0	11	6
PIC-CA-T-22_PT-ET-S04	NFF Caveiro	Caveiro meio da reserva	PIC-CA-T-22	26S	396643	4255074	BALA	2000	July	Ethylene	PT-ET-S04	312	Acorigone acoreensis (Wunderlich)	Acorigone	acoreensis		(Wunderlich, 1992)	Linyphiidae	Araneae	Arachnida	E	A_END	P	0	1	0	0	0	1	1
PIC-CA-T-22_B-IL-S03	NFF Caveiro	Caveiro meio da reserva	PIC-CA-T-22	26S	396643	4255074	BALA	2000	July	Ilex	B-IL-S03	312	Acorigone acoreensis (Wunderlich)	Acorigone	acoreensis		(Wunderlich, 1992)	Linyphiidae	Araneae	Arachnida	E	A_END	P	0	0	1	1	0	2	1
PIC-CA-T-22_B-IL-S04	NFF Caveiro	Caveiro meio da reserva	PIC-CA-T-22	26S	396643	4255074	BALA	2000	July	Ilex	B-IL-S04	312	Acorigone acoreensis (Wunderlich)	Acorigone	acoreensis		(Wunderlich, 1992)	Linyphiidae	Araneae	Arachnida	E	A_END	P	0	1	0	0	0	1	1
PIC-CA-T-22_B-IL-S09	NFF Caveiro	Caveiro meio da reserva	PIC-CA-T-22	26S	396643	4255074	BALA	2000	July	Ilex	B-IL-S09	312	Acorigone acoreensis (Wunderlich)	Acorigone	acoreensis		(Wunderlich, 1992)	Linyphiidae	Araneae	Arachnida	E	A_END	P	0	0	2	4	0	6	2
PIC-CA-T-22_B-JU-S02	NFF Caveiro	Caveiro meio da reserva	PIC-CA-T-22	26S	396643	4255074	BALA	2000	July	Juniperus	B-JU-S02	312	Acorigone acoreensis (Wunderlich)	Acorigone	acoreensis		(Wunderlich, 1992)	Linyphiidae	Araneae	Arachnida	E	A_END	P	0	2	3	7	0	12	5
PIC-CA-T-22_B-JU-S04	NFF Caveiro	Caveiro meio da reserva	PIC-CA-T-22	26S	396643	4255074	BALA	2000	July	Juniperus	B-JU-S04	312	Acorigone acoreensis (Wunderlich)	Acorigone	acoreensis		(Wunderlich, 1992)	Linyphiidae	Araneae	Arachnida	E	A_END	P	0	0	1	0	0	1	1
PIC-CA-T-22_B-JU-S06	NFF Caveiro	Caveiro meio da reserva	PIC-CA-T-22	26S	396643	4255074	BALA	2000	July	Juniperus	B-JU-S06	312	Acorigone acoreensis (Wunderlich)	Acorigone	acoreensis		(Wunderlich, 1992)	Linyphiidae	Araneae	Arachnida	E	A_END	P	0	0	0	1	0	1	0
PIC-CA-T-22_B-JU-S08	NFF Caveiro	Caveiro meio da reserva	PIC-CA-T-22	26S	396643	4255074	BALA	2000	July	Juniperus	B-JU-S08	312	Acorigone acoreensis (Wunderlich)	Acorigone	acoreensis		(Wunderlich, 1992)	Linyphiidae	Araneae	Arachnida	E	A_END	P	0	0	1	4	0	5	1
PIC-CA-T-22_B-JU-S10	NFF Caveiro	Caveiro meio da reserva	PIC-CA-T-22	26S	396643	4255074	BALA	2000	July	Juniperus	B-JU-S10	312	Acorigone acoreensis (Wunderlich)	Acorigone	acoreensis		(Wunderlich, 1992)	Linyphiidae	Araneae	Arachnida	E	A_END	P	0	0	1	0	0	1	1
PIC-LC-T-02_B-IL-S05	NFF Lagoa do Caiado	Euphorbia	PIC-LC-T-02	26S	390266	4257172	BALA	1999	September	Ilex	B-IL-S05	312	Acorigone acoreensis (Wunderlich)	Acorigone	acoreensis		(Wunderlich, 1992)	Linyphiidae	Araneae	Arachnida	E	A_END	P	0	0	0	1	0	1	0
PIC-LC-T-02_B-IL-S08	NFF Lagoa do Caiado	Euphorbia	PIC-LC-T-02	26S	390266	4257172	BALA	1999	September	Ilex	B-IL-S08	312	Acorigone acoreensis (Wunderlich)	Acorigone	acoreensis		(Wunderlich, 1992)	Linyphiidae	Araneae	Arachnida	E	A_END	P	0	0	0	1	0	1	0
PIC-LC-T-06_B-IL-S01	NFF Lagoa do Caiado	Margem Lagoa	PIC-LC-T-06	26S	390720	4257063	BALA	1999	September	Ilex	B-IL-S01	312	Acorigone acoreensis (Wunderlich)	Acorigone	acoreensis		(Wunderlich, 1992)	Linyphiidae	Araneae	Arachnida	E	A_END	P	0	0	1	0	0	1	1
PIC-LC-T-16_B-JU-S03	NFF Lagoa do Caiado	Frente Lagoa	PIC-LC-T-16	26S	390537	4257057	BALA	2000	July	Juniperus	B-JU-S03	312	Acorigone acoreensis (Wunderlich)	Acorigone	acoreensis		(Wunderlich, 1992)	Linyphiidae	Araneae	Arachnida	E	A_END	P	0	1	0	0	0	1	1
PIC-LC-T-16_B-JU-S10	NFF Lagoa do Caiado	Frente Lagoa	PIC-LC-T-16	26S	390537	4257057	BALA	2000	July	Juniperus	B-JU-S10	312	Acorigone acoreensis (Wunderlich)	Acorigone	acoreensis		(Wunderlich, 1992)	Linyphiidae	Araneae	Arachnida	E	A_END	P	0	0	0	1	0	1	0
PIC-LC-T-16_B-IL-S01	NFF Lagoa do Caiado	Frente Lagoa	PIC-LC-T-16	26S	390537	4257057	BALA	2000	July	Ilex	B-IL-S01	312	Acorigone acoreensis (Wunderlich)	Acorigone	acoreensis		(Wunderlich, 1992)	Linyphiidae	Araneae	Arachnida	E	A_END	P	0	0	0	1	0	1	0
PIC-LC-T-16_PT-TU-S25	NFF Lagoa do Caiado	Frente Lagoa	PIC-LC-T-16	26S	390537	4257057	BALA	2000	July	Turquin	PT-TU-S25	312	Acorigone acoreensis (Wunderlich)	Acorigone	acoreensis		(Wunderlich, 1992)	Linyphiidae	Araneae	Arachnida	E	A_END	P	0	0	1	0	0	1	1
PIC-LC-T-17_B-JU-S02	NFF Lagoa do Caiado	Frente Euphorbia	PIC-LC-T-17	26S	390661	4257058	BALA	2000	July	Juniperus	B-JU-S02	312	Acorigone acoreensis (Wunderlich)	Acorigone	acoreensis		(Wunderlich, 1992)	Linyphiidae	Araneae	Arachnida	E	A_END	P	0	0	0	1	0	1	0
PIC-LC-T-17_B-JU-S06	NFF Lagoa do Caiado	Frente Euphorbia	PIC-LC-T-17	26S	390661	4257058	BALA	2000	July	Juniperus	B-JU-S06	312	Acorigone acoreensis (Wunderlich)	Acorigone	acoreensis		(Wunderlich, 1992)	Linyphiidae	Araneae	Arachnida	E	A_END	P	0	0	0	1	0	1	0
PIC-LC-T-17_B-MS-S01	NFF Lagoa do Caiado	Frente Euphorbia	PIC-LC-T-17	26S	390661	4257058	BALA	2000	July	Myrsine	B-MS-S01	312	Acorigone acoreensis (Wunderlich)	Acorigone	acoreensis		(Wunderlich, 1992)	Linyphiidae	Araneae	Arachnida	E	A_END	P	0	0	0	1	0	1	0
PIC-LC-T-17_B-MS-S02	NFF Lagoa do Caiado	Frente Euphorbia	PIC-LC-T-17	26S	390661	4257058	BALA	2000	July	Myrsine	B-MS-S02	312	Acorigone acoreensis (Wunderlich)	Acorigone	acoreensis		(Wunderlich, 1992)	Linyphiidae	Araneae	Arachnida	E	A_END	P	0	0	2	0	0	2	2
PIC-LC-T-17_B-MS-S03	NFF Lagoa do Caiado	Frente Euphorbia	PIC-LC-T-17	26S	390661	4257058	BALA	2000	July	Myrsine	B-MS-S03	312	Acorigone acoreensis (Wunderlich)	Acorigone	acoreensis		(Wunderlich, 1992)	Linyphiidae	Araneae	Arachnida	E	A_END	P	0	0	2	2	0	4	2
PIC-LC-T-17_B-MS-S05	NFF Lagoa do Caiado	Frente Euphorbia	PIC-LC-T-17	26S	390661	4257058	BALA	2000	July	Myrsine	B-MS-S05	312	Acorigone acoreensis (Wunderlich)	Acorigone	acoreensis		(Wunderlich, 1992)	Linyphiidae	Araneae	Arachnida	E	A_END	P	0	0	0	1	0	1	0
PIC-LC-T-17_B-MS-S10	NFF Lagoa do Caiado	Frente Euphorbia	PIC-LC-T-17	26S	390661	4257058	BALA	2000	July	Myrsine	B-MS-S10	312	Acorigone acoreensis (Wunderlich)	Acorigone	acoreensis		(Wunderlich, 1992)	Linyphiidae	Araneae	Arachnida	E	A_END	P	0	2	3	5	0	10	5
PIC-LC-T-17_PT-TU-S15	NFF Lagoa do Caiado	Frente Euphorbia	PIC-LC-T-17	26S	390661	4257058	BALA	2000	July	Turquin	PT-TU-S15	312	Acorigone acoreensis (Wunderlich)	Acorigone	acoreensis		(Wunderlich, 1992)	Linyphiidae	Araneae	Arachnida	E	A_END	P	0	1	0	0	0	1	1
PIC-MP-T-01_B-JU-S03	NFF Mistério da Prainha	Chão Verde superior	PIC-MP-T-01	26S	388838	4259774	BALA	1999	September	Juniperus	B-JU-S03	312	Acorigone acoreensis (Wunderlich)	Acorigone	acoreensis		(Wunderlich, 1992)	Linyphiidae	Araneae	Arachnida	E	A_END	P	0	0	1	0	0	1	1
PIC-MP-T-01_B-IL-S03	NFF Mistério da Prainha	Chão Verde superior	PIC-MP-T-01	26S	388838	4259774	BALA2	2010	July	Ilex	B-IL-S03	312	Acorigone acoreensis (Wunderlich)	Acorigone	acoreensis		(Wunderlich, 1992)	Linyphiidae	Araneae	Arachnida	E	A_END	P	0	0	1	0	0	1	1
PIC-MP-T-03_B-JU-S01	NFF Mistério da Prainha	Chão Verde inferior	PIC-MP-T-03	26S	388946	4260693	BALA	1999	September	Juniperus	B-JU-S01	312	Acorigone acoreensis (Wunderlich)	Acorigone	acoreensis		(Wunderlich, 1992)	Linyphiidae	Araneae	Arachnida	E	A_END	P	0	0	1	0	0	1	1
PIC-MP-T-10_B-JU-S07	NFF Mistério da Prainha	Mistério esq esq	PIC-MP-T-10	26S	388683	4257957	BALA	1999	September	Juniperus	B-JU-S07	312	Acorigone acoreensis (Wunderlich)	Acorigone	acoreensis		(Wunderlich, 1992)	Linyphiidae	Araneae	Arachnida	E	A_END	P	0	0	0	1	0	1	0
PIC-MP-T-10_B-JU-S09	NFF Mistério da Prainha	Mistério esq esq	PIC-MP-T-10	26S	388683	4257957	BALA	1999	September	Juniperus	B-JU-S09	312	Acorigone acoreensis (Wunderlich)	Acorigone	acoreensis		(Wunderlich, 1992)	Linyphiidae	Araneae	Arachnida	E	A_END	P	0	0	0	1	0	1	0
PIC-MP-T-10_B-IL-S10	NFF Mistério da Prainha	Mistério esq esq	PIC-MP-T-10	26S	388683	4257957	BALA	1999	September	Ilex	B-IL-S10	312	Acorigone acoreensis (Wunderlich)	Acorigone	acoreensis		(Wunderlich, 1992)	Linyphiidae	Araneae	Arachnida	E	A_END	P	0	0	1	0	0	1	1
PIC-MP-T-12_B-JU-S07	NFF Mistério da Prainha	Mistério esq dir	PIC-MP-T-12	26S	388857	4258741	BALA	1999	September	Juniperus	B-JU-S07	312	Acorigone acoreensis (Wunderlich)	Acorigone	acoreensis		(Wunderlich, 1992)	Linyphiidae	Araneae	Arachnida	E	A_END	P	0	0	0	1	0	1	0
PIC-MP-T-12_B-JU-S09	NFF Mistério da Prainha	Mistério esq dir	PIC-MP-T-12	26S	388857	4258741	BALA	1999	September	Juniperus	B-JU-S09	312	Acorigone acoreensis (Wunderlich)	Acorigone	acoreensis		(Wunderlich, 1992)	Linyphiidae	Araneae	Arachnida	E	A_END	P	0	0	0	1	0	1	0
PIC-MP-T-12_B-ER-S04	NFF Mistério da Prainha	Mistério esq dir	PIC-MP-T-12	26S	388857	4258741	BALA	1999	September	Erica	B-ER-S04	312	Acorigone acoreensis (Wunderlich)	Acorigone	acoreensis		(Wunderlich, 1992)	Linyphiidae	Araneae	Arachnida	E	A_END	P	0	0	1	7	0	8	1
PIC-MP-T-12_B-IL-S09	NFF Mistério da Prainha	Mistério esq dir	PIC-MP-T-12	26S	388857	4258741	BALA	1999	September	Ilex	B-IL-S09	312	Acorigone acoreensis (Wunderlich)	Acorigone	acoreensis		(Wunderlich, 1992)	Linyphiidae	Araneae	Arachnida	E	A_END	P	0	1	1	4	0	6	2
PIC-MP-T-15_B-JU-S01	NFF Mistério da Prainha	Chão Verde superior perpendicular	PIC-MP-T-15	26S	389035	4259508	BALA	2000	July	Juniperus	B-JU-S01	312	Acorigone acoreensis (Wunderlich)	Acorigone	acoreensis		(Wunderlich, 1992)	Linyphiidae	Araneae	Arachnida	E	A_END	P	0	4	5	5	0	14	9
PIC-MP-T-15_B-JU-S02	NFF Mistério da Prainha	Chão Verde superior perpendicular	PIC-MP-T-15	26S	389035	4259508	BALA	2000	July	Juniperus	B-JU-S02	312	Acorigone acoreensis (Wunderlich)	Acorigone	acoreensis		(Wunderlich, 1992)	Linyphiidae	Araneae	Arachnida	E	A_END	P	0	1	0	0	0	1	1
PIC-MP-T-15_B-JU-S09	NFF Mistério da Prainha	Chão Verde superior perpendicular	PIC-MP-T-15	26S	389035	4259508	BALA	2000	July	Juniperus	B-JU-S09	312	Acorigone acoreensis (Wunderlich)	Acorigone	acoreensis		(Wunderlich, 1992)	Linyphiidae	Araneae	Arachnida	E	A_END	P	0	0	0	1	0	1	0
PIC-MP-T-15_B-IL-S04	NFF Mistério da Prainha	Chão Verde superior perpendicular	PIC-MP-T-15	26S	389035	4259508	BALA	2000	July	Ilex	B-IL-S04	312	Acorigone acoreensis (Wunderlich)	Acorigone	acoreensis		(Wunderlich, 1992)	Linyphiidae	Araneae	Arachnida	E	A_END	P	0	0	0	1	0	1	0
SJG-PP-T-02_B-JU-S09	NFF Pico Pinheiro	Pinheiro juniperal	SJG-PP-T-02	26S	408586	4278492	BALA	1999	July	Juniperus	B-JU-S09	312	Acorigone acoreensis (Wunderlich)	Acorigone	acoreensis		(Wunderlich, 1992)	Linyphiidae	Araneae	Arachnida	E	A_END	P	0	1	0	0	0	1	1
SJG-PP-T-02_B-JU-S05	NFF Pico Pinheiro	Pinheiro juniperal	SJG-PP-T-02	26S	408586	4278492	BALA2	2010	September	Juniperus	B-JU-S05	312	Acorigone acoreensis (Wunderlich)	Acorigone	acoreensis		(Wunderlich, 1992)	Linyphiidae	Araneae	Arachnida	E	A_END	P	0	0	0	1	0	1	0
SJG-PP-T-09_B-JU-S08	NFF Pico Pinheiro	Pinheiro erical	SJG-PP-T-09	26S	408602	4277888	BALA	2000	July	Juniperus	B-JU-S08	312	Acorigone acoreensis (Wunderlich)	Acorigone	acoreensis		(Wunderlich, 1992)	Linyphiidae	Araneae	Arachnida	E	A_END	P	0	0	1	1	0	2	1
SJG-PP-T-09_B-JU-S04	NFF Pico Pinheiro	Pinheiro erical	SJG-PP-T-09	26S	408602	4277888	BALA2	2010	September	Juniperus	B-JU-S04	312	Acorigone acoreensis (Wunderlich)	Acorigone	acoreensis		(Wunderlich, 1992)	Linyphiidae	Araneae	Arachnida	E	A_END	P	0	0	0	1	0	1	0
SJG-PP-T-09_B-JU-S05	NFF Pico Pinheiro	Pinheiro erical	SJG-PP-T-09	26S	408602	4277888	BALA2	2010	September	Juniperus	B-JU-S05	312	Acorigone acoreensis (Wunderlich)	Acorigone	acoreensis		(Wunderlich, 1992)	Linyphiidae	Araneae	Arachnida	E	A_END	P	0	0	1	1	0	2	1
SJG-PP-T-09_B-JU-S07	NFF Pico Pinheiro	Pinheiro erical	SJG-PP-T-09	26S	408602	4277888	BALA2	2010	September	Juniperus	B-JU-S07	312	Acorigone acoreensis (Wunderlich)	Acorigone	acoreensis		(Wunderlich, 1992)	Linyphiidae	Araneae	Arachnida	E	A_END	P	0	0	1	0	0	1	1
SJG-TO-T-06_B-IL-S09	NFF Topo	Mata Estado C	SJG-TO-T-06	26S	422089	4271756	BALA2	2010	September	Ilex	B-IL-S09	312	Acorigone acoreensis (Wunderlich)	Acorigone	acoreensis		(Wunderlich, 1992)	Linyphiidae	Araneae	Arachnida	E	A_END	P	0	0	1	0	0	1	1
SJG-TO-T-12_B-JU-S04	NFF Topo	Mata Estado C2	SJG-TO-T-12	26S	421857	4272031	BALA	2000	August	Juniperus	B-JU-S04	312	Acorigone acoreensis (Wunderlich)	Acorigone	acoreensis		(Wunderlich, 1992)	Linyphiidae	Araneae	Arachnida	E	A_END	P	0	0	2	2	0	4	2
SJG-TO-T-12_B-JU-S06	NFF Topo	Mata Estado C2	SJG-TO-T-12	26S	421857	4272031	BALA	2000	August	Juniperus	B-JU-S06	312	Acorigone acoreensis (Wunderlich)	Acorigone	acoreensis		(Wunderlich, 1992)	Linyphiidae	Araneae	Arachnida	E	A_END	P	0	0	0	3	0	3	0
SJG-TO-T-12_B-JU-S07	NFF Topo	Mata Estado C2	SJG-TO-T-12	26S	421857	4272031	BALA	2000	August	Juniperus	B-JU-S07	312	Acorigone acoreensis (Wunderlich)	Acorigone	acoreensis		(Wunderlich, 1992)	Linyphiidae	Araneae	Arachnida	E	A_END	P	0	0	0	1	0	1	0
SJG-TO-T-12_B-JU-S08	NFF Topo	Mata Estado C2	SJG-TO-T-12	26S	421857	4272031	BALA	2000	August	Juniperus	B-JU-S08	312	Acorigone acoreensis (Wunderlich)	Acorigone	acoreensis		(Wunderlich, 1992)	Linyphiidae	Araneae	Arachnida	E	A_END	P	0	0	0	1	0	1	0
SJG-TO-T-12_B-JU-S09	NFF Topo	Mata Estado C2	SJG-TO-T-12	26S	421857	4272031	BALA	2000	August	Juniperus	B-JU-S09	312	Acorigone acoreensis (Wunderlich)	Acorigone	acoreensis		(Wunderlich, 1992)	Linyphiidae	Araneae	Arachnida	E	A_END	P	0	0	0	1	0	1	0
SJG-TO-T-15_B-VA-S04	NFF Topo	Topo juniperal	SJG-TO-T-15	26S	422255	4271216	PhD Clara	2004	July	Vaccinium	B-VA-S04	312	Acorigone acoreensis (Wunderlich)	Acorigone	acoreensis		(Wunderlich, 1992)	Linyphiidae	Araneae	Arachnida	E	A_END	P	0	0	0	1	0	1	0
SJG-TO-T-15_B-JU-S04	NFF Topo	Topo juniperal	SJG-TO-T-15	26S	422255	4271216	PhD Clara	2004	July	Juniperus	B-JU-S04	312	Acorigone acoreensis (Wunderlich)	Acorigone	acoreensis		(Wunderlich, 1992)	Linyphiidae	Araneae	Arachnida	E	A_END	P	0	0	0	1	0	1	0
SJG-TO-T-16_B-IL-S04	NFF Topo	Topo Euphorbia	SJG-TO-T-16	26S	422871	4271075	PhD Clara	2004	July	Ilex	B-IL-S04	312	Acorigone acoreensis (Wunderlich)	Acorigone	acoreensis		(Wunderlich, 1992)	Linyphiidae	Araneae	Arachnida	E	A_END	P	0	1	1	2	0	4	2
SJG-TO-T-16_B-JU-S03	NFF Topo	Topo Euphorbia	SJG-TO-T-16	26S	422871	4271075	PhD Clara	2004	July	Juniperus	B-JU-S03	312	Acorigone acoreensis (Wunderlich)	Acorigone	acoreensis		(Wunderlich, 1992)	Linyphiidae	Araneae	Arachnida	E	A_END	P	0	0	0	1	0	1	0
SJG-TO-T-16_B-JU-S04	NFF Topo	Topo Euphorbia	SJG-TO-T-16	26S	422871	4271075	PhD Clara	2004	July	Juniperus	B-JU-S04	312	Acorigone acoreensis (Wunderlich)	Acorigone	acoreensis		(Wunderlich, 1992)	Linyphiidae	Araneae	Arachnida	E	A_END	P	0	0	0	2	0	2	0
SMG-GR-T-03_PT-ET-S26	NFF Graminhais	Graminhais encosta	SMG-GR-T-03	26S	654557	4185354	BALA2	2010	june	Ethylene	PT-ET-S26	312	Acorigone acoreensis (Wunderlich)	Acorigone	acoreensis		(Wunderlich, 1992)	Linyphiidae	Araneae	Arachnida	E	A_END	P	0	0	1	0	0	1	1
SMG-GR-T-03_PT-ET-S12	NFF Graminhais	Graminhais encosta	SMG-GR-T-03	26S	654557	4185354	BALA2	2010	june	Ethylene	PT-ET-S12	312	Acorigone acoreensis (Wunderlich)	Acorigone	acoreensis		(Wunderlich, 1992)	Linyphiidae	Araneae	Arachnida	E	A_END	P	0	2	0	1	0	3	2
SMG-GR-T-03_PT-ET-S16	NFF Graminhais	Graminhais encosta	SMG-GR-T-03	26S	654557	4185354	BALA2	2010	june	Ethylene	PT-ET-S16	312	Acorigone acoreensis (Wunderlich)	Acorigone	acoreensis		(Wunderlich, 1992)	Linyphiidae	Araneae	Arachnida	E	A_END	P	0	1	0	0	0	1	1
SMG-GR-T-07_PT-TU-S27	NFF Graminhais	Ribeira	SMG-GR-T-07	26S	654838	4185138	BALA	1999	July	Turquin	PT-TU-S27	312	Acorigone acoreensis (Wunderlich)	Acorigone	acoreensis		(Wunderlich, 1992)	Linyphiidae	Araneae	Arachnida	E	A_END	P	0	1	0	1	0	2	1
SMG-GR-T-07_PT-TU-S17	NFF Graminhais	Ribeira	SMG-GR-T-07	26S	654838	4185138	BALA2	2010	june	Turquin	PT-TU-S17	312	Acorigone acoreensis (Wunderlich)	Acorigone	acoreensis		(Wunderlich, 1992)	Linyphiidae	Araneae	Arachnida	E	A_END	P	0	1	0	0	0	1	1
SMG-GR-T-07_PT-TU-S07	NFF Graminhais	Ribeira	SMG-GR-T-07	26S	654838	4185138	BALA2	2010	june	Turquin	PT-TU-S07	312	Acorigone acoreensis (Wunderlich)	Acorigone	acoreensis		(Wunderlich, 1992)	Linyphiidae	Araneae	Arachnida	E	A_END	P	0	1	0	0	0	1	1
SMG-GR-T-14_B-JU-S04	NFF Graminhais	Ao longo ribeira	SMG-GR-T-14	26S	654669	4185360	PhD Clara	2004	June	Juniperus	B-JU-S04	312	Acorigone acoreensis (Wunderlich)	Acorigone	acoreensis		(Wunderlich, 1992)	Linyphiidae	Araneae	Arachnida	E	A_END	P	0	0	0	1	0	1	0
SMG-GR-T-14_B-JU-S02	NFF Graminhais	Ao longo ribeira	SMG-GR-T-14	26S	654669	4185360	PhD Clara	2004	June	Juniperus	B-JU-S02	312	Acorigone acoreensis (Wunderlich)	Acorigone	acoreensis		(Wunderlich, 1992)	Linyphiidae	Araneae	Arachnida	E	A_END	P	0	0	0	1	0	1	0
SMG-PV-T-08_PT-TU-S19	NFF Pico da Vara	Pico Vara A	SMG-PV-T-08	26S	657757	4186138	BALA	1999	July	Turquin	PT-TU-S19	312	Acorigone acoreensis (Wunderlich)	Acorigone	acoreensis		(Wunderlich, 1992)	Linyphiidae	Araneae	Arachnida	E	A_END	P	0	1	0	0	0	1	1
SMG-PV-T-08_PT-ET-S20	NFF Pico da Vara	Pico Vara A	SMG-PV-T-08	26S	657757	4186138	BALA	1999	July	Ethylene	PT-ET-S20	312	Acorigone acoreensis (Wunderlich)	Acorigone	acoreensis		(Wunderlich, 1992)	Linyphiidae	Araneae	Arachnida	E	A_END	P	0	1	0	0	0	1	1
SMR-PA-T-04_B-LA-S07	NFF Pico Alto	Ana e Clara	SMR-PA-T-04	26S	670170	4094140	PhD Clara	2004	June	Laurus	B-LA-S07	312	Acorigone acoreensis (Wunderlich)	Acorigone	acoreensis		(Wunderlich, 1992)	Linyphiidae	Araneae	Arachnida	E	A_END	P	0	0	1	0	0	1	1
SMR-PA-T-04_B-LA-S02	NFF Pico Alto	Ana e Clara	SMR-PA-T-04	26S	670170	4094140	PhD Clara	2004	June	Laurus	B-LA-S02	312	Acorigone acoreensis (Wunderlich)	Acorigone	acoreensis		(Wunderlich, 1992)	Linyphiidae	Araneae	Arachnida	E	A_END	P	0	0	1	0	0	1	1
SMR-PA-T-04_B-LA-S10	NFF Pico Alto	Ana e Clara	SMR-PA-T-04	26S	670170	4094140	PhD Clara	2004	June	Laurus	B-LA-S10	312	Acorigone acoreensis (Wunderlich)	Acorigone	acoreensis		(Wunderlich, 1992)	Linyphiidae	Araneae	Arachnida	E	A_END	P	0	0	1	0	0	1	1
SMR-PA-T-04_B-PT-S09	NFF Pico Alto	Ana e Clara	SMR-PA-T-04	26S	670170	4094140	PhD Clara	2004	June	Pittosporum	B-PT-S09	312	Acorigone acoreensis (Wunderlich)	Acorigone	acoreensis		(Wunderlich, 1992)	Linyphiidae	Araneae	Arachnida	E	A_END	P	0	0	1	0	0	1	1
TER-BF-T-01_B-IL-S03	NFF Biscoito da Ferraria	Labaçal T2 Clara	TER-BF-T-01	26S	480849	4290312	BALA	1999	June	Ilex	B-IL-S03	312	Acorigone acoreensis (Wunderlich)	Acorigone	acoreensis		(Wunderlich, 1992)	Linyphiidae	Araneae	Arachnida	E	A_END	P	0	0	0	1	0	1	0
TER-BF-T-01_B-IL-S15	NFF Biscoito da Ferraria	Labaçal T2 Clara	TER-BF-T-01	26S	480849	4290312	BALA2	2011	June	Ilex	B-IL-S15	312	Acorigone acoreensis (Wunderlich)	Acorigone	acoreensis		(Wunderlich, 1992)	Linyphiidae	Araneae	Arachnida	E	A_END	P	0	0	2	0	0	2	2
TER-BF-T-01_B-JU-S06	NFF Biscoito da Ferraria	Labaçal T2 Clara	TER-BF-T-01	26S	480849	4290312	BALA2	2011	June	Juniperus	B-JU-S06	312	Acorigone acoreensis (Wunderlich)	Acorigone	acoreensis		(Wunderlich, 1992)	Linyphiidae	Araneae	Arachnida	E	A_END	P	0	0	1	0	0	1	1
TER-BF-T-01_B-LA-S05	NFF Biscoito da Ferraria	Labaçal T2 Clara	TER-BF-T-01	26S	480849	4290312	BALA2	2011	June	Laurus	B-LA-S05	312	Acorigone acoreensis (Wunderlich)	Acorigone	acoreensis		(Wunderlich, 1992)	Linyphiidae	Araneae	Arachnida	E	A_END	P	0	0	1	0	0	1	1
TER-BF-T-01_B-LA-S09	NFF Biscoito da Ferraria	Labaçal T2 Clara	TER-BF-T-01	26S	480849	4290312	BALA2	2011	June	Laurus	B-LA-S09	312	Acorigone acoreensis (Wunderlich)	Acorigone	acoreensis		(Wunderlich, 1992)	Linyphiidae	Araneae	Arachnida	E	A_END	P	0	0	1	0	0	1	1
TER-BF-T-02_B-JU-S04	NFF Biscoito da Ferraria	Chambre A T1 Clara	TER-BF-T-02	26S	479370	4289985	BALA2	2011	June	Juniperus	B-JU-S04	312	Acorigone acoreensis (Wunderlich)	Acorigone	acoreensis		(Wunderlich, 1992)	Linyphiidae	Araneae	Arachnida	E	A_END	P	0	0	2	0	0	2	2
TER-BF-T-02_B-JU-S07	NFF Biscoito da Ferraria	Chambre A T1 Clara	TER-BF-T-02	26S	479370	4289985	BALA2	2011	June	Juniperus	B-JU-S07	312	Acorigone acoreensis (Wunderlich)	Acorigone	acoreensis		(Wunderlich, 1992)	Linyphiidae	Araneae	Arachnida	E	A_END	P	0	0	1	1	0	2	1
TER-BF-T-02_B-JU-S08	NFF Biscoito da Ferraria	Chambre A T1 Clara	TER-BF-T-02	26S	479370	4289985	BALA2	2011	June	Juniperus	B-JU-S08	312	Acorigone acoreensis (Wunderlich)	Acorigone	acoreensis		(Wunderlich, 1992)	Linyphiidae	Araneae	Arachnida	E	A_END	P	0	0	1	0	0	1	1
TER-BF-T-02_B-MS-S09	NFF Biscoito da Ferraria	Chambre A T1 Clara	TER-BF-T-02	26S	479370	4289985	BALA2	2011	June	Myrsine	B-MS-S09	312	Acorigone acoreensis (Wunderlich)	Acorigone	acoreensis		(Wunderlich, 1992)	Linyphiidae	Araneae	Arachnida	E	A_END	P	0	0	0	1	0	1	0
TER-BF-T-04_B-JU-S04	NFF Biscoito da Ferraria	Chambre B	TER-BF-T-04	26S	479467	4289620	BALA	2000	September	Juniperus	B-JU-S04	312	Acorigone acoreensis (Wunderlich)	Acorigone	acoreensis		(Wunderlich, 1992)	Linyphiidae	Araneae	Arachnida	E	A_END	P	0	0	1	0	0	1	1
TER-BF-T-04_B-JU-S06	NFF Biscoito da Ferraria	Chambre B	TER-BF-T-04	26S	479467	4289620	BALA	2000	September	Juniperus	B-JU-S06	312	Acorigone acoreensis (Wunderlich)	Acorigone	acoreensis		(Wunderlich, 1992)	Linyphiidae	Araneae	Arachnida	E	A_END	P	0	0	2	0	0	2	2
TER-BF-T-38_PT-TU-S19	NFF Biscoito da Ferraria	Labaçal erical	TER-BF-T-38	26S	480778	4290662	PhD Clara	2003	June	Turquin	PT-TU-S19	312	Acorigone acoreensis (Wunderlich)	Acorigone	acoreensis		(Wunderlich, 1992)	Linyphiidae	Araneae	Arachnida	E	A_END	P	0	0	1	0	0	1	1
TER-BF-T-38_PT-TU-S19	NFF Biscoito da Ferraria	Labaçal erical	TER-BF-T-38	26S	480778	4290662	PhD Clara	2003	June	Turquin	PT-TU-S19	312	Acorigone acoreensis (Wunderlich)	Acorigone	acoreensis		(Wunderlich, 1992)	Linyphiidae	Araneae	Arachnida	E	A_END	P	0	0	1	0	0	1	1
TER-BF-TP41_B-ER-S10	NFF Biscoito da Ferraria	Pico Alto nascente	TER-BF-TP41	26S	481855	4289438	PhD Clara	2003	July	Erica	B-ER-S10	312	Acorigone acoreensis (Wunderlich)	Acorigone	acoreensis		(Wunderlich, 1992)	Linyphiidae	Araneae	Arachnida	E	A_END	P	0	0	1	0	0	1	1
TER-BF-TP41_B-ER-S08	NFF Biscoito da Ferraria	Pico Alto nascente	TER-BF-TP41	26S	481855	4289438	PhD Clara	2003	July	Erica	B-ER-S08	312	Acorigone acoreensis (Wunderlich)	Acorigone	acoreensis		(Wunderlich, 1992)	Linyphiidae	Araneae	Arachnida	E	A_END	P	0	1	0	0	0	1	1
TER-BF-TP42_B-JU-S02	NFF Biscoito da Ferraria	Biscoito centro	TER-BF-TP42	26S	480073	4290159	PhD Clara	2003	July	Juniperus	B-JU-S02	312	Acorigone acoreensis (Wunderlich)	Acorigone	acoreensis		(Wunderlich, 1992)	Linyphiidae	Araneae	Arachnida	E	A_END	P	0	0	1	0	0	1	1
TER-BF-TY02_B-JU-S05	NFF Biscoito da Ferraria	Chambre A T1 Clara	TER-BF-TY02	26S	479370	4289985	PhD Clara	2003	June	Juniperus	B-JU-S05	312	Acorigone acoreensis (Wunderlich)	Acorigone	acoreensis		(Wunderlich, 1992)	Linyphiidae	Araneae	Arachnida	E	A_END	P	0	1	0	0	0	1	1
TER-BF-TY02_B-JU-S04	NFF Biscoito da Ferraria	Chambre A T1 Clara	TER-BF-TY02	26S	479370	4289985	PhD Clara	2003	June	Juniperus	B-JU-S04	312	Acorigone acoreensis (Wunderlich)	Acorigone	acoreensis		(Wunderlich, 1992)	Linyphiidae	Araneae	Arachnida	E	A_END	P	0	0	0	3	0	3	0
TER-GM-T-35_B-LA-S02	NFF Caldeira Guilherme Moniz	GM direita entrada	TER-GM-T-35	26S	481290	4284785	Geotermia1	2002	September	Laurus	B-LA-S02	312	Acorigone acoreensis (Wunderlich)	Acorigone	acoreensis		(Wunderlich, 1992)	Linyphiidae	Araneae	Arachnida	E	A_END	P	0	0	0	1	0	1	0
TER-GM-T-35_B-LA-S03	NFF Caldeira Guilherme Moniz	GM direita entrada	TER-GM-T-35	26S	481290	4284785	Geotermia1	2002	September	Laurus	B-LA-S03	312	Acorigone acoreensis (Wunderlich)	Acorigone	acoreensis		(Wunderlich, 1992)	Linyphiidae	Araneae	Arachnida	E	A_END	P	0	0	0	1	0	1	0
TER-GM-T-35_B-LA-S05	NFF Caldeira Guilherme Moniz	GM direita entrada	TER-GM-T-35	26S	481290	4284785	Geotermia1	2002	September	Laurus	B-LA-S05	312	Acorigone acoreensis (Wunderlich)	Acorigone	acoreensis		(Wunderlich, 1992)	Linyphiidae	Araneae	Arachnida	E	A_END	P	0	0	0	1	0	1	0
TER-PG-T-22_B-JU-S03	NFF Pico Galhardo	Pico X A	TER-PG-T-22	26S	479664	4287554	BALA2	2010	June	Juniperus	B-JU-S03	312	Acorigone acoreensis (Wunderlich)	Acorigone	acoreensis		(Wunderlich, 1992)	Linyphiidae	Araneae	Arachnida	E	A_END	P	0	0	1	0	0	1	1
TER-PG-T-22_B-VA-S02	NFF Pico Galhardo	Pico X A	TER-PG-T-22	26S	479664	4287554	BALA2	2010	June	Vaccinium	B-VA-S02	312	Acorigone acoreensis (Wunderlich)	Acorigone	acoreensis		(Wunderlich, 1992)	Linyphiidae	Araneae	Arachnida	E	A_END	P	0	0	1	0	0	1	1
TER-PG-T-22_B-JU-S07	NFF Pico Galhardo	Pico X A	TER-PG-T-22	26S	479664	4287554	Geotermia1	2002	July	Juniperus	B-JU-S07	312	Acorigone acoreensis (Wunderlich)	Acorigone	acoreensis		(Wunderlich, 1992)	Linyphiidae	Araneae	Arachnida	E	A_END	P	0	0	0	1	0	1	0
TER-PG-T-22_B-JU-S09	NFF Pico Galhardo	Pico X A	TER-PG-T-22	26S	479664	4287554	Geotermia1	2002	July	Juniperus	B-JU-S09	312	Acorigone acoreensis (Wunderlich)	Acorigone	acoreensis		(Wunderlich, 1992)	Linyphiidae	Araneae	Arachnida	E	A_END	P	0	0	1	0	0	1	1
TER-PG-T-33_B-JU-S09	NFF Pico Galhardo	Pico X B	TER-PG-T-33	26S	480249	4287288	BALA2	2010	June	Juniperus	B-JU-S09	312	Acorigone acoreensis (Wunderlich)	Acorigone	acoreensis		(Wunderlich, 1992)	Linyphiidae	Araneae	Arachnida	E	A_END	P	0	0	1	0	0	1	1
TER-PG-T-33_B-VA-S10	NFF Pico Galhardo	Pico X B	TER-PG-T-33	26S	480249	4287288	BALA2	2010	June	Vaccinium	B-VA-S10	312	Acorigone acoreensis (Wunderlich)	Acorigone	acoreensis		(Wunderlich, 1992)	Linyphiidae	Araneae	Arachnida	E	A_END	P	0	0	1	0	0	1	1
TER-PG-T-33_B-JU-S03	NFF Pico Galhardo	Pico X B	TER-PG-T-33	26S	480249	4287288	Geotermia1	2002	September	Juniperus	B-JU-S03	312	Acorigone acoreensis (Wunderlich)	Acorigone	acoreensis		(Wunderlich, 1992)	Linyphiidae	Araneae	Arachnida	E	A_END	P	0	0	0	1	0	1	0
TER-PG-T-33_B-LA-S03	NFF Pico Galhardo	Pico X B	TER-PG-T-33	26S	480249	4287288	Geotermia1	2002	September	Laurus	B-LA-S03	312	Acorigone acoreensis (Wunderlich)	Acorigone	acoreensis		(Wunderlich, 1992)	Linyphiidae	Araneae	Arachnida	E	A_END	P	0	0	1	0	0	1	1
TER-PG-T-33_B-VA-S03	NFF Pico Galhardo	Pico X B	TER-PG-T-33	26S	480249	4287288	Geotermia1	2002	September	Vaccinium	B-VA-S03	312	Acorigone acoreensis (Wunderlich)	Acorigone	acoreensis		(Wunderlich, 1992)	Linyphiidae	Araneae	Arachnida	E	A_END	P	0	0	1	0	0	1	1
TER-PG-T-40_B-JU-S06	NFF Pico Galhardo	Pico X C	TER-PG-T-40	26S	480133	4287199	PhD Clara	2003	June	Juniperus	B-JU-S06	312	Acorigone acoreensis (Wunderlich)	Acorigone	acoreensis		(Wunderlich, 1992)	Linyphiidae	Araneae	Arachnida	E	A_END	P	0	0	0	1	0	1	0
TER-PG-T-40_B-LA-S02	NFF Pico Galhardo	Pico X C	TER-PG-T-40	26S	480133	4287199	PhD Clara	2003	August	Laurus	B-LA-S02	312	Acorigone acoreensis (Wunderlich)	Acorigone	acoreensis		(Wunderlich, 1992)	Linyphiidae	Araneae	Arachnida	E	A_END	P	0	0	0	1	0	1	0
TER-PG-T-44_B-JU-S04	NFF Pico Galhardo	Pico X D	TER-PG-T-44	26S	480217	4287486	PhD Clara	2003	July	Juniperus	B-JU-S04	312	Acorigone acoreensis (Wunderlich)	Acorigone	acoreensis		(Wunderlich, 1992)	Linyphiidae	Araneae	Arachnida	E	A_END	P	0	1	0	0	0	1	1
TER-PG-T-44_B-JU-S07	NFF Pico Galhardo	Pico X D	TER-PG-T-44	26S	480217	4287486	PhD Clara	2003	July	Juniperus	B-JU-S07	312	Acorigone acoreensis (Wunderlich)	Acorigone	acoreensis		(Wunderlich, 1992)	Linyphiidae	Araneae	Arachnida	E	A_END	P	0	1	1	0	0	2	2
TER-SB-T-05_B-JU-S03	NFF Serra Sta. Bárbara	Tanque	TER-SB-T-05	26S	471646	4286413	BALA	1999	June	Juniperus	B-JU-S03	312	Acorigone acoreensis (Wunderlich)	Acorigone	acoreensis		(Wunderlich, 1992)	Linyphiidae	Araneae	Arachnida	E	A_END	P	0	0	0	3	0	3	0
TER-SB-T-06_B-IL-S09	NFF Serra Sta. Bárbara	Lagoinha	TER-SB-T-06	26S	471077	4289150	BALA	1999	June	Ilex	B-IL-S09	312	Acorigone acoreensis (Wunderlich)	Acorigone	acoreensis		(Wunderlich, 1992)	Linyphiidae	Araneae	Arachnida	E	A_END	P	0	0	0	1	0	1	0
TER-SB-T-06_B-JU-S07	NFF Serra Sta. Bárbara	Lagoinha	TER-SB-T-06	26S	471077	4289150	BALA2	2010	August	Juniperus	B-JU-S07	312	Acorigone acoreensis (Wunderlich)	Acorigone	acoreensis		(Wunderlich, 1992)	Linyphiidae	Araneae	Arachnida	E	A_END	P	0	1	1	0	0	2	2
TER-SB-T-08_B-JU-S02	NFF Serra Sta. Bárbara	Mistérios Negros B	TER-SB-T-08	26S	475412	4287363	BALA	1999	August	Juniperus	B-JU-S02	312	Acorigone acoreensis (Wunderlich)	Acorigone	acoreensis		(Wunderlich, 1992)	Linyphiidae	Araneae	Arachnida	E	A_END	P	0	0	0	2	0	2	0
TER-SB-T-08_B-MS-S09	NFF Serra Sta. Bárbara	Mistérios Negros B	TER-SB-T-08	26S	475412	4287363	BALA	1999	August	Myrsine	B-MS-S09	312	Acorigone acoreensis (Wunderlich)	Acorigone	acoreensis		(Wunderlich, 1992)	Linyphiidae	Araneae	Arachnida	E	A_END	P	0	0	1	0	0	1	1
TER-SB-T-09_PT-TU-S03	NFF Serra Sta. Bárbara	Cume	TER-SB-T-09	26S	473218	4287447	BALA	1999	August	Turquin	PT-TU-S03	312	Acorigone acoreensis (Wunderlich)	Acorigone	acoreensis		(Wunderlich, 1992)	Linyphiidae	Araneae	Arachnida	E	A_END	P	0	0	1	0	0	1	1
TER-SB-T-09_PT-ET-S04	NFF Serra Sta. Bárbara	Cume	TER-SB-T-09	26S	473218	4287447	BALA	1999	August	Ethylene	PT-ET-S04	312	Acorigone acoreensis (Wunderlich)	Acorigone	acoreensis		(Wunderlich, 1992)	Linyphiidae	Araneae	Arachnida	E	A_END	P	0	0	1	0	0	1	1
TER-SB-T-09_B-MS-S09	NFF Serra Sta. Bárbara	Cume	TER-SB-T-09	26S	473218	4287447	BALA	1999	August	Myrsine	B-MS-S09	312	Acorigone acoreensis (Wunderlich)	Acorigone	acoreensis		(Wunderlich, 1992)	Linyphiidae	Araneae	Arachnida	E	A_END	P	0	0	0	1	0	1	0
TER-SB-T-10_B-JU-S01	NFF Serra Sta. Bárbara	Pico Pinheiro Catarina	TER-SB-T-10	26S	472868	4287382	BALA	1999	August	Juniperus	B-JU-S01	312	Acorigone acoreensis (Wunderlich)	Acorigone	acoreensis		(Wunderlich, 1992)	Linyphiidae	Araneae	Arachnida	E	A_END	P	0	0	0	4	0	4	0
TER-SB-T-10_B-JU-S03	NFF Serra Sta. Bárbara	Pico Pinheiro Catarina	TER-SB-T-10	26S	472868	4287382	BALA	1999	August	Juniperus	B-JU-S03	312	Acorigone acoreensis (Wunderlich)	Acorigone	acoreensis		(Wunderlich, 1992)	Linyphiidae	Araneae	Arachnida	E	A_END	P	0	0	3	12	0	15	3
TER-SB-T-10_B-JU-S05	NFF Serra Sta. Bárbara	Pico Pinheiro Catarina	TER-SB-T-10	26S	472868	4287382	BALA	1999	August	Juniperus	B-JU-S05	312	Acorigone acoreensis (Wunderlich)	Acorigone	acoreensis		(Wunderlich, 1992)	Linyphiidae	Araneae	Arachnida	E	A_END	P	0	1	0	0	0	1	1
TER-SB-T-10_B-JU-S06	NFF Serra Sta. Bárbara	Pico Pinheiro Catarina	TER-SB-T-10	26S	472868	4287382	BALA	1999	August	Juniperus	B-JU-S06	312	Acorigone acoreensis (Wunderlich)	Acorigone	acoreensis		(Wunderlich, 1992)	Linyphiidae	Araneae	Arachnida	E	A_END	P	0	1	0	0	0	1	1
TER-SB-T-10_B-IL-S08	NFF Serra Sta. Bárbara	Pico Pinheiro Catarina	TER-SB-T-10	26S	472868	4287382	BALA	1999	August	Ilex	B-IL-S08	312	Acorigone acoreensis (Wunderlich)	Acorigone	acoreensis		(Wunderlich, 1992)	Linyphiidae	Araneae	Arachnida	E	A_END	P	0	0	0	1	0	1	0
TER-SB-T-10_B-IL-S10	NFF Serra Sta. Bárbara	Pico Pinheiro Catarina	TER-SB-T-10	26S	472868	4287382	BALA	1999	August	Ilex	B-IL-S10	312	Acorigone acoreensis (Wunderlich)	Acorigone	acoreensis		(Wunderlich, 1992)	Linyphiidae	Araneae	Arachnida	E	A_END	P	0	0	0	2	0	2	0
TER-SB-T-10_B-MS-S01	NFF Serra Sta. Bárbara	Pico Pinheiro Catarina	TER-SB-T-10	26S	472868	4287382	BALA	1999	August	Myrsine	B-MS-S01	312	Acorigone acoreensis (Wunderlich)	Acorigone	acoreensis		(Wunderlich, 1992)	Linyphiidae	Araneae	Arachnida	E	A_END	P	0	0	0	1	0	1	0
TER-SB-T-10_B-VA-S09	NFF Serra Sta. Bárbara	Pico Pinheiro Catarina	TER-SB-T-10	26S	472868	4287382	BALA	1999	August	Vaccinium	B-VA-S09	312	Acorigone acoreensis (Wunderlich)	Acorigone	acoreensis		(Wunderlich, 1992)	Linyphiidae	Araneae	Arachnida	E	A_END	P	0	0	0	1	0	1	0
TER-SB-T-11_PT-TU-S25	NFF Serra Sta. Bárbara	Caldeira A	TER-SB-T-11	26S	472028	4288949	BALA	2001	July	Turquin	PT-TU-S25	312	Acorigone acoreensis (Wunderlich)	Acorigone	acoreensis		(Wunderlich, 1992)	Linyphiidae	Araneae	Arachnida	E	A_END	P	0	0	1	0	0	1	1
TER-SB-T-11_PT-TU-S03	NFF Serra Sta. Bárbara	Caldeira A	TER-SB-T-11	26S	472028	4288949	BALA	2001	July	Turquin	PT-TU-S03	312	Acorigone acoreensis (Wunderlich)	Acorigone	acoreensis		(Wunderlich, 1992)	Linyphiidae	Araneae	Arachnida	E	A_END	P	0	0	0	1	0	1	0
TER-SB-T-11_B-JU-S01	NFF Serra Sta. Bárbara	Caldeira A	TER-SB-T-11	26S	472028	4288949	BALA	2001	July	Juniperus	B-JU-S01	312	Acorigone acoreensis (Wunderlich)	Acorigone	acoreensis		(Wunderlich, 1992)	Linyphiidae	Araneae	Arachnida	E	A_END	P	0	1	0	0	0	1	1
TER-SB-T-11_PT-ET-S22	NFF Serra Sta. Bárbara	Caldeira A	TER-SB-T-11	26S	472028	4288949	BALA2	2010	September	Ethylene	PT-ET-S22	312	Acorigone acoreensis (Wunderlich)	Acorigone	acoreensis		(Wunderlich, 1992)	Linyphiidae	Araneae	Arachnida	E	A_END	P	0	0	1	0	0	1	1
TER-SB-T-11_B-IL-S02	NFF Serra Sta. Bárbara	Caldeira A	TER-SB-T-11	26S	472028	4288949	BALA2	2010	September	Ilex	B-IL-S02	312	Acorigone acoreensis (Wunderlich)	Acorigone	acoreensis		(Wunderlich, 1992)	Linyphiidae	Araneae	Arachnida	E	A_END	P	0	0	0	1	0	1	0
TER-SB-T-11_B-IL-S06	NFF Serra Sta. Bárbara	Caldeira A	TER-SB-T-11	26S	472028	4288949	BALA2	2010	September	Ilex	B-IL-S06	312	Acorigone acoreensis (Wunderlich)	Acorigone	acoreensis		(Wunderlich, 1992)	Linyphiidae	Araneae	Arachnida	E	A_END	P	0	0	1	0	0	1	1
TER-SB-T-11_B-JU-S01	NFF Serra Sta. Bárbara	Caldeira A	TER-SB-T-11	26S	472028	4288949	BALA2	2010	September	Juniperus	B-JU-S01	312	Acorigone acoreensis (Wunderlich)	Acorigone	acoreensis		(Wunderlich, 1992)	Linyphiidae	Araneae	Arachnida	E	A_END	P	0	3	4	0	0	7	7
TER-SB-T-11_B-JU-S02	NFF Serra Sta. Bárbara	Caldeira A	TER-SB-T-11	26S	472028	4288949	BALA2	2010	September	Juniperus	B-JU-S02	312	Acorigone acoreensis (Wunderlich)	Acorigone	acoreensis		(Wunderlich, 1992)	Linyphiidae	Araneae	Arachnida	E	A_END	P	0	0	1	0	0	1	1
TER-SB-T-11_B-JU-S06	NFF Serra Sta. Bárbara	Caldeira A	TER-SB-T-11	26S	472028	4288949	BALA2	2010	September	Juniperus	B-JU-S06	312	Acorigone acoreensis (Wunderlich)	Acorigone	acoreensis		(Wunderlich, 1992)	Linyphiidae	Araneae	Arachnida	E	A_END	P	0	1	0	0	0	1	1
TER-SB-T-11_PT-TU-S11	NFF Serra Sta. Bárbara	Caldeira A	TER-SB-T-11	26S	472028	4288949	BALA2	2010	September	Turquin	PT-TU-S11	312	Acorigone acoreensis (Wunderlich)	Acorigone	acoreensis		(Wunderlich, 1992)	Linyphiidae	Araneae	Arachnida	E	A_END	P	0	1	0	0	0	1	1
TER-SB-T-12_B-ER-S02	NFF Serra Sta. Bárbara	Pico Rachado	TER-SB-T-12	26S	473143	4290063	BALA	2001	July	Erica	B-ER-S02	312	Acorigone acoreensis (Wunderlich)	Acorigone	acoreensis		(Wunderlich, 1992)	Linyphiidae	Araneae	Arachnida	E	A_END	P	0	0	1	0	0	1	1
TER-SB-T-12_B-ER-S05	NFF Serra Sta. Bárbara	Pico Rachado	TER-SB-T-12	26S	473143	4290063	BALA	2001	July	Erica	B-ER-S05	312	Acorigone acoreensis (Wunderlich)	Acorigone	acoreensis		(Wunderlich, 1992)	Linyphiidae	Araneae	Arachnida	E	A_END	P	0	0	0	1	0	1	0
TER-SB-T-46_B-JU-S02	NFF Serra Sta. Bárbara	Mistérios Negros erical	TER-SB-T-46	26S	475348	4287229	PhD Clara	2003	July	Juniperus	B-JU-S02	312	Acorigone acoreensis (Wunderlich)	Acorigone	acoreensis		(Wunderlich, 1992)	Linyphiidae	Araneae	Arachnida	E	A_END	P	0	0	1	0	0	1	1
TER-SB-T-47_PT-TU-S13	NFF Serra Sta. Bárbara	Caldeira B	TER-SB-T-47	26S	472890	4287587	PhD Clara	2003	August	Turquin	PT-TU-S13	312	Acorigone acoreensis (Wunderlich)	Acorigone	acoreensis		(Wunderlich, 1992)	Linyphiidae	Araneae	Arachnida	E	A_END	P	0	0	1	0	0	1	1
TER-SB-T-47_PT-TU-S05	NFF Serra Sta. Bárbara	Caldeira B	TER-SB-T-47	26S	472890	4287587	PhD Clara	2003	August	Turquin	PT-TU-S05	312	Acorigone acoreensis (Wunderlich)	Acorigone	acoreensis		(Wunderlich, 1992)	Linyphiidae	Araneae	Arachnida	E	A_END	P	0	1	0	0	0	1	1
TER-SB-TE48_B-JU-S24	NFF Serra Sta. Bárbara	Lagoinha B	TER-SB-TE48	26S	471172	4289221	PhD Clara	2003	August	Juniperus	B-JU-S24	312	Acorigone acoreensis (Wunderlich)	Acorigone	acoreensis		(Wunderlich, 1992)	Linyphiidae	Araneae	Arachnida	E	A_END	P	0	0	0	1	0	1	0
TER-SB-TE49_PT-TU-S05	NFF Serra Sta. Bárbara	Pinheiro B	TER-SB-TE49	26S	472292	428880	PhD Clara	2003	July	Turquin	PT-TU-S05	312	Acorigone acoreensis (Wunderlich)	Acorigone	acoreensis		(Wunderlich, 1992)	Linyphiidae	Araneae	Arachnida	E	A_END	P	0	0	1	0	0	1	1
TER-SB-TE49_PT-ET-S08	NFF Serra Sta. Bárbara	Pinheiro B	TER-SB-TE49	26S	472292	428880	PhD Clara	2003	July	Ethylene	PT-ET-S08	312	Acorigone acoreensis (Wunderlich)	Acorigone	acoreensis		(Wunderlich, 1992)	Linyphiidae	Araneae	Arachnida	E	A_END	P	0	0	1	0	0	1	1
TER-SB-TE49_PT-TU-S19	NFF Serra Sta. Bárbara	Pinheiro B	TER-SB-TE49	26S	472292	428880	PhD Clara	2003	July	Turquin	PT-TU-S19	312	Acorigone acoreensis (Wunderlich)	Acorigone	acoreensis		(Wunderlich, 1992)	Linyphiidae	Araneae	Arachnida	E	A_END	P	0	1	0	0	0	1	1
TER-SB-TE49_PT-ET-S06	NFF Serra Sta. Bárbara	Pinheiro B	TER-SB-TE49	26S	472292	428880	PhD Clara	2003	July	Ethylene	PT-ET-S06	312	Acorigone acoreensis (Wunderlich)	Acorigone	acoreensis		(Wunderlich, 1992)	Linyphiidae	Araneae	Arachnida	E	A_END	P	0	0	1	0	0	1	1
TER-TB-T-15_B-JU-S09	NFF Terra Brava	Terra Brava A	TER-TB-T-15	26S	482438	4287412	BALA	2001	September	Juniperus	B-JU-S09	312	Acorigone acoreensis (Wunderlich)	Acorigone	acoreensis		(Wunderlich, 1992)	Linyphiidae	Araneae	Arachnida	E	A_END	P	0	1	0	0	0	1	1
TER-TB-T-15_B-IL-S02	NFF Terra Brava	Terra Brava A	TER-TB-T-15	26S	482438	4287412	BALA	2001	September	Ilex	B-IL-S02	312	Acorigone acoreensis (Wunderlich)	Acorigone	acoreensis		(Wunderlich, 1992)	Linyphiidae	Araneae	Arachnida	E	A_END	P	0	1	1	1	0	3	2
TER-TB-T-15_B-IL-S06	NFF Terra Brava	Terra Brava A	TER-TB-T-15	26S	482438	4287412	BALA	2001	September	Ilex	B-IL-S06	312	Acorigone acoreensis (Wunderlich)	Acorigone	acoreensis		(Wunderlich, 1992)	Linyphiidae	Araneae	Arachnida	E	A_END	P	0	1	0	0	0	1	1
TER-TB-T-15_B-LA-S07	NFF Terra Brava	Terra Brava A	TER-TB-T-15	26S	482438	4287412	BALA	2001	September	Laurus	B-LA-S07	312	Acorigone acoreensis (Wunderlich)	Acorigone	acoreensis		(Wunderlich, 1992)	Linyphiidae	Araneae	Arachnida	E	A_END	P	0	0	0	3	0	3	0
TER-TB-T-15_B-LA-S08	NFF Terra Brava	Terra Brava A	TER-TB-T-15	26S	482438	4287412	BALA	2001	September	Laurus	B-LA-S08	312	Acorigone acoreensis (Wunderlich)	Acorigone	acoreensis		(Wunderlich, 1992)	Linyphiidae	Araneae	Arachnida	E	A_END	P	0	0	1	0	0	1	1
TER-TB-T-15_B-IL-S02	NFF Terra Brava	Terra Brava A	TER-TB-T-15	26S	482438	4287412	BALA2	2011	June	Ilex	B-IL-S02	312	Acorigone acoreensis (Wunderlich)	Acorigone	acoreensis		(Wunderlich, 1992)	Linyphiidae	Araneae	Arachnida	E	A_END	P	0	0	1	0	0	1	1
TER-TB-T-15_B-IL-S04	NFF Terra Brava	Terra Brava A	TER-TB-T-15	26S	482438	4287412	BALA2	2011	June	Ilex	B-IL-S04	312	Acorigone acoreensis (Wunderlich)	Acorigone	acoreensis		(Wunderlich, 1992)	Linyphiidae	Araneae	Arachnida	E	A_END	P	0	0	1	0	0	1	1
TER-TB-T-15_B-IL-S05	NFF Terra Brava	Terra Brava A	TER-TB-T-15	26S	482438	4287412	BALA2	2011	June	Ilex	B-IL-S05	312	Acorigone acoreensis (Wunderlich)	Acorigone	acoreensis		(Wunderlich, 1992)	Linyphiidae	Araneae	Arachnida	E	A_END	P	0	0	0	1	0	1	0
TER-TB-T-15_B-IL-S06	NFF Terra Brava	Terra Brava A	TER-TB-T-15	26S	482438	4287412	BALA2	2011	June	Ilex	B-IL-S06	312	Acorigone acoreensis (Wunderlich)	Acorigone	acoreensis		(Wunderlich, 1992)	Linyphiidae	Araneae	Arachnida	E	A_END	P	0	0	2	0	0	2	2
TER-TB-T-15_B-IL-S08	NFF Terra Brava	Terra Brava A	TER-TB-T-15	26S	482438	4287412	BALA2	2011	June	Ilex	B-IL-S08	312	Acorigone acoreensis (Wunderlich)	Acorigone	acoreensis		(Wunderlich, 1992)	Linyphiidae	Araneae	Arachnida	E	A_END	P	0	2	1	0	0	3	3
TER-TB-T-15_B-IL-S09	NFF Terra Brava	Terra Brava A	TER-TB-T-15	26S	482438	4287412	BALA2	2011	June	Ilex	B-IL-S09	312	Acorigone acoreensis (Wunderlich)	Acorigone	acoreensis		(Wunderlich, 1992)	Linyphiidae	Araneae	Arachnida	E	A_END	P	0	1	0	1	0	2	1
TER-TB-T-15_B-IL-S10	NFF Terra Brava	Terra Brava A	TER-TB-T-15	26S	482438	4287412	BALA2	2011	June	Ilex	B-IL-S10	312	Acorigone acoreensis (Wunderlich)	Acorigone	acoreensis		(Wunderlich, 1992)	Linyphiidae	Araneae	Arachnida	E	A_END	P	0	1	0	0	0	1	1
TER-TB-T-15_B-LA-S01	NFF Terra Brava	Terra Brava A	TER-TB-T-15	26S	482438	4287412	BALA2	2010	July	Laurus	B-LA-S01	312	Acorigone acoreensis (Wunderlich)	Acorigone	acoreensis		(Wunderlich, 1992)	Linyphiidae	Araneae	Arachnida	E	A_END	P	0	1	0	0	0	1	1
TER-TB-T-15_B-LA-S09	NFF Terra Brava	Terra Brava A	TER-TB-T-15	26S	482438	4287412	BALA2	2010	July	Laurus	B-LA-S09	312	Acorigone acoreensis (Wunderlich)	Acorigone	acoreensis		(Wunderlich, 1992)	Linyphiidae	Araneae	Arachnida	E	A_END	P	0	0	1	0	0	1	1
TER-TB-T-16_B-JU-S06	NFF Terra Brava	Terra Brava C	TER-TB-T-16	26S	482076	4287536	BALA	2001	July	Juniperus	B-JU-S06	312	Acorigone acoreensis (Wunderlich)	Acorigone	acoreensis		(Wunderlich, 1992)	Linyphiidae	Araneae	Arachnida	E	A_END	P	0	0	2	0	0	2	2
TER-TB-T-18_B-IL-S05	NFF Terra Brava	Terra Brava B	TER-TB-T-18	26S	482792	4287094	BALA2	2010	August	Ilex	B-IL-S05	312	Acorigone acoreensis (Wunderlich)	Acorigone	acoreensis		(Wunderlich, 1992)	Linyphiidae	Araneae	Arachnida	E	A_END	P	0	1	0	0	0	1	1
TER-TB-T-18_B-IL-S06	NFF Terra Brava	Terra Brava B	TER-TB-T-18	26S	482792	4287094	BALA2	2010	August	Ilex	B-IL-S06	312	Acorigone acoreensis (Wunderlich)	Acorigone	acoreensis		(Wunderlich, 1992)	Linyphiidae	Araneae	Arachnida	E	A_END	P	0	0	1	0	0	1	1
TER-TB-T-18_B-IL-S07	NFF Terra Brava	Terra Brava B	TER-TB-T-18	26S	482792	4287094	BALA2	2010	August	Ilex	B-IL-S07	312	Acorigone acoreensis (Wunderlich)	Acorigone	acoreensis		(Wunderlich, 1992)	Linyphiidae	Araneae	Arachnida	E	A_END	P	0	2	1	1	0	4	3
TER-TB-T-18_B-JU-S08	NFF Terra Brava	Terra Brava B	TER-TB-T-18	26S	482792	4287094	BALA2	2010	August	Juniperus	B-JU-S08	312	Acorigone acoreensis (Wunderlich)	Acorigone	acoreensis		(Wunderlich, 1992)	Linyphiidae	Araneae	Arachnida	E	A_END	P	0	0	1	0	0	1	1
TER-TB-T-18_B-LA-S02	NFF Terra Brava	Terra Brava B	TER-TB-T-18	26S	482792	4287094	BALA2	2010	August	Laurus	B-LA-S02	312	Acorigone acoreensis (Wunderlich)	Acorigone	acoreensis		(Wunderlich, 1992)	Linyphiidae	Araneae	Arachnida	E	A_END	P	0	1	0	0	0	1	1
TER-TB-T-18_B-LA-S09	NFF Terra Brava	Terra Brava B	TER-TB-T-18	26S	482792	4287094	BALA2	2010	August	Laurus	B-LA-S09	312	Acorigone acoreensis (Wunderlich)	Acorigone	acoreensis		(Wunderlich, 1992)	Linyphiidae	Araneae	Arachnida	E	A_END	P	0	0	0	1	0	1	0
TER-TB-T-18_B-JU-S03	NFF Terra Brava	Terra Brava B	TER-TB-T-18	26S	482792	4287094	Geotermia1	2002	July	Juniperus	B-JU-S03	312	Acorigone acoreensis (Wunderlich)	Acorigone	acoreensis		(Wunderlich, 1992)	Linyphiidae	Araneae	Arachnida	E	A_END	P	0	1	0	0	0	1	1
TER-TB-T-18_B-JU-S04	NFF Terra Brava	Terra Brava B	TER-TB-T-18	26S	482792	4287094	Geotermia1	2002	July	Juniperus	B-JU-S04	312	Acorigone acoreensis (Wunderlich)	Acorigone	acoreensis		(Wunderlich, 1992)	Linyphiidae	Araneae	Arachnida	E	A_END	P	0	0	0	1	0	1	0
TER-TB-T-18_B-IL-S04	NFF Terra Brava	Terra Brava B	TER-TB-T-18	26S	482792	4287094	Geotermia1	2002	July	Ilex	B-IL-S04	312	Acorigone acoreensis (Wunderlich)	Acorigone	acoreensis		(Wunderlich, 1992)	Linyphiidae	Araneae	Arachnida	E	A_END	P	0	0	0	1	0	1	0
TER-TB-T-18_B-IL-S05	NFF Terra Brava	Terra Brava B	TER-TB-T-18	26S	482792	4287094	Geotermia1	2002	July	Ilex	B-IL-S05	312	Acorigone acoreensis (Wunderlich)	Acorigone	acoreensis		(Wunderlich, 1992)	Linyphiidae	Araneae	Arachnida	E	A_END	P	0	0	0	1	0	1	0
TER-TB-T-18_B-IL-S06	NFF Terra Brava	Terra Brava B	TER-TB-T-18	26S	482792	4287094	Geotermia1	2002	July	Ilex	B-IL-S06	312	Acorigone acoreensis (Wunderlich)	Acorigone	acoreensis		(Wunderlich, 1992)	Linyphiidae	Araneae	Arachnida	E	A_END	P	0	0	0	4	0	4	0
TER-TB-T-18_B-IL-S09	NFF Terra Brava	Terra Brava B	TER-TB-T-18	26S	482792	4287094	Geotermia1	2002	July	Ilex	B-IL-S09	312	Acorigone acoreensis (Wunderlich)	Acorigone	acoreensis		(Wunderlich, 1992)	Linyphiidae	Araneae	Arachnida	E	A_END	P	0	0	0	1	0	1	0
TER-TB-T-18_B-LA-S05	NFF Terra Brava	Terra Brava B	TER-TB-T-18	26S	482792	4287094	Geotermia1	2002	July	Laurus	B-LA-S05	312	Acorigone acoreensis (Wunderlich)	Acorigone	acoreensis		(Wunderlich, 1992)	Linyphiidae	Araneae	Arachnida	E	A_END	P	0	1	0	0	0	1	1
TER-TB-T-34_PT-TU-S03	NFF Terra Brava	Erical pastagem A	TER-TB-T-34	26S	482470	4287736	Geotermia1	2002	July	Turquin	PT-TU-S03	312	Acorigone acoreensis (Wunderlich)	Acorigone	acoreensis		(Wunderlich, 1992)	Linyphiidae	Araneae	Arachnida	E	A_END	P	0	0	1	0	0	1	1
TER-TB-T-34_PT-TU-S09	NFF Terra Brava	Erical pastagem A	TER-TB-T-34	26S	482470	4287736	Geotermia1	2002	July	Turquin	PT-TU-S09	312	Acorigone acoreensis (Wunderlich)	Acorigone	acoreensis		(Wunderlich, 1992)	Linyphiidae	Araneae	Arachnida	E	A_END	P	0	0	0	1	0	1	0
TER-TB-TY15_B-LA-S10	NFF Terra Brava	Terra Brava A	TER-TB-TY15	26S	482438	4287412	PhD Clara	2003	June	Laurus	B-LA-S10	312	Acorigone acoreensis (Wunderlich)	Acorigone	acoreensis		(Wunderlich, 1992)	Linyphiidae	Araneae	Arachnida	E	A_END	P	0	0	0	1	0	1	0
TER-TB-TY18_B-IL-S04	NFF Terra Brava	Terra Brava B	TER-TB-TY18	26S	482792	4287094	PhD Clara	2003	August	Ilex	B-IL-S04	312	Acorigone acoreensis (Wunderlich)	Acorigone	acoreensis		(Wunderlich, 1992)	Linyphiidae	Araneae	Arachnida	E	A_END	P	0	0	0	1	0	1	0
SJG-TO-T-06_PT-TU-S27	NFF Topo	Mata Estado C	SJG-TO-T-06	26S	422089	4271756	BALA	1999	July	Turquin	PT-TU-S27	589	Acorigone zebraneus Wunderlich	Acorigone	zebraneus		Wunderlich, 2008	Linyphiidae	Araneae	Arachnida	E	SIE	P	0	0	0	3	0	3	0
SJG-TO-T-12_PT-TU-S05	NFF Topo	Mata Estado C2	SJG-TO-T-12	26S	421857	4272031	BALA	2000	August	Turquin	PT-TU-S05	589	Acorigone zebraneus Wunderlich	Acorigone	zebraneus		Wunderlich, 2008	Linyphiidae	Araneae	Arachnida	E	SIE	P	0	1	0	0	0	1	1
SJG-TO-T-12_PT-TU-S19	NFF Topo	Mata Estado C2	SJG-TO-T-12	26S	421857	4272031	BALA	2000	August	Turquin	PT-TU-S19	589	Acorigone zebraneus Wunderlich	Acorigone	zebraneus		Wunderlich, 2008	Linyphiidae	Araneae	Arachnida	E	SIE	P	0	0	0	2	0	2	0
SJG-TO-T-12_PT-TU-S25	NFF Topo	Mata Estado C2	SJG-TO-T-12	26S	421857	4272031	BALA	2000	August	Turquin	PT-TU-S25	589	Acorigone zebraneus Wunderlich	Acorigone	zebraneus		Wunderlich, 2008	Linyphiidae	Araneae	Arachnida	E	SIE	P	0	0	1	0	0	1	1
SJG-TO-T-16_PT-TU-S01	NFF Topo	Topo Euphorbia	SJG-TO-T-16	26S	422871	4271075	PhD Clara	2004	July	Turquin	PT-TU-S01	589	Acorigone zebraneus Wunderlich	Acorigone	zebraneus		Wunderlich, 2008	Linyphiidae	Araneae	Arachnida	E	SIE	P	0	0	1	0	0	1	1
SJG-PP-T-02_PT-TU-S23	NFF Pico Pinheiro	Pinheiro juniperal	SJG-PP-T-02	26S	408586	4278492	BALA	1999	July	Turquin	PT-TU-S23	455	Acupalpus dubius Schilsky	Acupalpus	dubius		Schilsky, 1888	Carabidae	Coleoptera	Insecta	N		P	0	0	1	0	0	1	1
FAI-CF-T-11_PT-TU-S25	NFF Caldeira do Faial	Fundo Caldeira	FAI-CF-T-11	26S	350857	4272272	PhD Clara	2004	July	Turquin	PT-TU-S25	757	Acupalpus flavicollis (Sturm)	Acupalpus	flavicollis		(Sturm, 1825)	Carabidae	Coleoptera	Insecta	N		P	0	0	1	0	0	1	1
FAI-CF-T-11_PT-ET-S04	NFF Caldeira do Faial	Fundo Caldeira	FAI-CF-T-11	26S	350857	4272272	PhD Clara	2004	July	Ethylene	PT-ET-S04	757	Acupalpus flavicollis (Sturm)	Acupalpus	flavicollis		(Sturm, 1825)	Carabidae	Coleoptera	Insecta	N		P	0	0	1	0	0	1	1
FAI-CF-T-11_PT-ET-S26	NFF Caldeira do Faial	Fundo Caldeira	FAI-CF-T-11	26S	350857	4272272	PhD Clara	2004	July	Ethylene	PT-ET-S26	757	Acupalpus flavicollis (Sturm)	Acupalpus	flavicollis		(Sturm, 1825)	Carabidae	Coleoptera	Insecta	N		P	0	0	2	0	0	2	2
FAI-CF-TB26_P-ET-S22	NFF Caldeira do Faial	Fundo Caldeira2	FAI-CF-TB26	26S	350857	4272272	BALA2	2010	September	Ethylene	P-ET-S22	757	Acupalpus flavicollis (Sturm)	Acupalpus	flavicollis		(Sturm, 1825)	Carabidae	Coleoptera	Insecta	N		P	1					1	1
FAI-CF-TB26_P-TU-S11	NFF Caldeira do Faial	Fundo Caldeira2	FAI-CF-TB26	26S	350857	4272272	BALA2	2010	September	Turquin	P-TU-S11	757	Acupalpus flavicollis (Sturm)	Acupalpus	flavicollis		(Sturm, 1825)	Carabidae	Coleoptera	Insecta	N		P	1					1	1
FAI-CF-TB26_P-TU-S29	NFF Caldeira do Faial	Fundo Caldeira2	FAI-CF-TB26	26S	350857	4272272	BALA2	2010	September	Turquin	P-TU-S29	757	Acupalpus flavicollis (Sturm)	Acupalpus	flavicollis		(Sturm, 1825)	Carabidae	Coleoptera	Insecta	N		P	1					1	1
FAI-CF-TB26_P-TU-S19	NFF Caldeira do Faial	Fundo Caldeira2	FAI-CF-TB26	26S	350857	4272272	BALA2	2010	September	Turquin	P-TU-S19	757	Acupalpus flavicollis (Sturm)	Acupalpus	flavicollis		(Sturm, 1825)	Carabidae	Coleoptera	Insecta	N		P	1					1	1
FLO-MA-T-05_B-LA-S01	NFF Morro Alto e Pico da Sé	Encosta Caldeira Branca	FLO-MA-T-05	25S	137340	4375246	BALA	1999	July	Laurus	B-LA-S01	232	Acyrthosiphon pisum Harris	Acyrthosiphon	pisum		(Harris, 1776)	Aphididae	Hemiptera	Insecta	N		H	0	0	0	1	0	1	0
SMG-GR-T-07_PT-ET-S02	NFF Graminhais	Ribeira	SMG-GR-T-07	26S	654838	4185138	BALA2	2010	june	Ethylene	PT-ET-S02	232	Acyrthosiphon pisum Harris	Acyrthosiphon	pisum		(Harris, 1776)	Aphididae	Hemiptera	Insecta	N		H	1	0	0	0	0	1	1
TER-BF-TY01_B-LA-S10	NFF Biscoito da Ferraria	Labaçal T2 Clara	TER-BF-TY01	26S	480849	4290312	PhD Clara	2003	June	Laurus	B-LA-S10	895	Aeolothrips collaris Priesner	Aeolothrips	collaris		Priesner, 1919	Aeolothripidae	Thysanoptera	Insecta	N		P	0	0	0	0	1	1	0
FAI-CF-TB26_P-TU-S09	NFF Caldeira do Faial	Fundo Caldeira2	FAI-CF-TB26	26S	350857	4272272	BALA2	2010	September	Turquin	P-TU-S09	640	Aeolothrips gloriosus Bagnall	Gen.	sp.9			Aeolothripidae	Thysanoptera	Insecta	N		P	1					1	1
PIC-LC-T-17_B-ER-S06	NFF Lagoa do Caiado	Frente Euphorbia	PIC-LC-T-17	26S	390661	4257058	BALA	2000	July	Erica	B-ER-S06	640	Aeolothrips gloriosus Bagnall	Aeolothrips	gloriosus		Bagnall, 1914	Aeolothripidae	Thysanoptera	Insecta	N		P	1	0	0	0	0	1	1
PIC-MP-T-15_B-LA-S08	NFF Mistério da Prainha	Chão Verde superior perpendicular	PIC-MP-T-15	26S	389035	4259508	BALA	2000	July	Laurus	B-LA-S08	640	Aeolothrips gloriosus Bagnall	Aeolothrips	gloriosus		Bagnall, 1914	Aeolothripidae	Thysanoptera	Insecta	N		P	1	0	0	0	0	1	1
SJG-TO-T-15_B-VA-S04	NFF Topo	Topo juniperal	SJG-TO-T-15	26S	422255	4271216	PhD Clara	2004	July	Vaccinium	B-VA-S04	640	Aeolothrips gloriosus Bagnall	Aeolothrips	gloriosus		Bagnall, 1914	Aeolothripidae	Thysanoptera	Insecta	N		P	0	0	0	2		2	0
SJG-TO-T-15_B-ER-S02	NFF Topo	Topo juniperal	SJG-TO-T-15	26S	422255	4271216	PhD Clara	2004	July	Erica	B-ER-S02	640	Aeolothrips gloriosus Bagnall	Aeolothrips	gloriosus		Bagnall, 1914	Aeolothripidae	Thysanoptera	Insecta	N		P	0	0	0	2		2	0
SJG-TO-T-15_B-VA-S09	NFF Topo	Topo juniperal	SJG-TO-T-15	26S	422255	4271216	PhD Clara	2004	July	Vaccinium	B-VA-S09	640	Aeolothrips gloriosus Bagnall	Aeolothrips	gloriosus		Bagnall, 1914	Aeolothripidae	Thysanoptera	Insecta	N		P	0	0	0	0	1	1	0
SJG-TO-T-15_B-ER-S09	NFF Topo	Topo juniperal	SJG-TO-T-15	26S	422255	4271216	PhD Clara	2004	July	Erica	B-ER-S09	640	Aeolothrips gloriosus Bagnall	Aeolothrips	gloriosus		Bagnall, 1914	Aeolothripidae	Thysanoptera	Insecta	N		P	0	0	0	0	1	1	0
TER-SB-T-12_B-ER-S04	NFF Serra Sta. Bárbara	Pico Rachado	TER-SB-T-12	26S	473143	4290063	BALA	2001	July	Erica	B-ER-S04	640	Aeolothrips gloriosus Bagnall	Aeolothrips	gloriosus		Bagnall, 1914	Aeolothripidae	Thysanoptera	Insecta	N		P	1	0	0	0	0	1	1
FAI-CG-T-01_PT-TU-S11	NFF Cabeço do Fogo	Erical	FAI-CG-T-01	26S	345906	4272298	BALA	1999	September	Turquin	PT-TU-S11	292	Aeolus melliculus moreleti Tarnier	Aeolus	melliculus	moreleti	Tarnier, 1860	Elateridae	Coleoptera	Insecta	I		S	2	0	0	0	0	2	2
FAI-CG-T-01_PT-TU-S21	NFF Cabeço do Fogo	Erical	FAI-CG-T-01	26S	345906	4272298	BALA	1999	September	Turquin	PT-TU-S21	292	Aeolus melliculus moreleti Tarnier	Aeolus	melliculus	moreleti	Tarnier, 1860	Elateridae	Coleoptera	Insecta	I		S	1	0	0	0	0	1	1
FAI-CG-T-01_PT-TU-S25	NFF Cabeço do Fogo	Erical	FAI-CG-T-01	26S	345906	4272298	BALA	1999	September	Turquin	PT-TU-S25	292	Aeolus melliculus moreleti Tarnier	Aeolus	melliculus	moreleti	Tarnier, 1860	Elateridae	Coleoptera	Insecta	I		S	1	0	0	0	0	1	1
FAI-CG-T-01_PT-ET-S12	NFF Cabeço do Fogo	Erical	FAI-CG-T-01	26S	345906	4272298	BALA	1999	September	Ethylene	PT-ET-S12	292	Aeolus melliculus moreleti Tarnier	Aeolus	melliculus	moreleti	Tarnier, 1860	Elateridae	Coleoptera	Insecta	I		S	2	0	0	0	0	2	2
FAI-CG-T-02_B-ER-S05	NFF Cabeço do Fogo	Caldeira	FAI-CG-T-02	26S	346188	4272501	BALA	1999	September	Erica	B-ER-S05	292	Aeolus melliculus moreleti Tarnier	Aeolus	melliculus	moreleti	Tarnier, 1860	Elateridae	Coleoptera	Insecta	I		S	1	0	0	0	0	1	1
FAI-CG-T-02_PT-TU-S07	NFF Cabeço do Fogo	Caldeira	FAI-CG-T-02	26S	346188	4272501	BALA	1999	September	Turquin	PT-TU-S07	292	Aeolus melliculus moreleti Tarnier	Aeolus	melliculus	moreleti	Tarnier, 1860	Elateridae	Coleoptera	Insecta	I		S	11	0	0	0	0	11	11
FAI-CG-T-02_PT-TU-S-1	NFF Cabeço do Fogo	Caldeira	FAI-CG-T-02	26S	346188	4272501	BALA	1999	September	Turquin	PT-TU-S-1	292	Aeolus melliculus moreleti Tarnier	Aeolus	melliculus	moreleti	Tarnier, 1860	Elateridae	Coleoptera	Insecta	I		S	1	0	0	0	0	1	1
FAI-CG-T-02_PT-TU-S01	NFF Cabeço do Fogo	Caldeira	FAI-CG-T-02	26S	346188	4272501	BALA	1999	September	Turquin	PT-TU-S01	292	Aeolus melliculus moreleti Tarnier	Aeolus	melliculus	moreleti	Tarnier, 1860	Elateridae	Coleoptera	Insecta	I		S	2	0	0	0	0	2	2
FAI-CG-T-02_B-ER-S01	NFF Cabeço do Fogo	Caldeira	FAI-CG-T-02	26S	346188	4272501	BALA	1999	September	Erica	B-ER-S01	292	Aeolus melliculus moreleti Tarnier	Aeolus	melliculus	moreleti	Tarnier, 1860	Elateridae	Coleoptera	Insecta	I		S	1	0	0	0	0	1	1
FLO-MA-T-15_PT-ET-S06	NFF Morro Alto e Pico da Sé	Pico da Sé	FLO-MA-T-15	25S	138230	4377715	BALA	2000	September	Ethylene	PT-ET-S06	586	Agabus bipustulatus (Linnaeus)	Agabus	bipustulatus		(Linnaeus, 1767)	Dytiscidae	Coleoptera	Insecta	N		P	1	0	0	0	0	1	1
FLO-MA-T-16_PT-TU-S15	NFF Morro Alto e Pico da Sé	Ribeira do Cascalho	FLO-MA-T-16	25S	139699	4378652	BALA	2000	September	Turquin	PT-TU-S15	586	Agabus bipustulatus (Linnaeus)	Agabus	bipustulatus		(Linnaeus, 1767)	Dytiscidae	Coleoptera	Insecta	N		P	1	0	0	0	0	1	1
SJG-TO-T-06_PT-TU-S29	NFF Topo	Mata Estado C	SJG-TO-T-06	26S	422089	4271756	BALA	1999	July	Turquin	PT-TU-S29	285	Agabus godmani Crotch	Agabus	godmani		Crotch, 1867	Dytiscidae	Coleoptera	Insecta	E	A_END	P	1	0	0	0	0	1	1
SJG-TO-T-06_PT-ET-S22	NFF Topo	Mata Estado C	SJG-TO-T-06	26S	422089	4271756	BALA	1999	July	Ethylene	PT-ET-S22	285	Agabus godmani Crotch	Agabus	godmani		Crotch, 1867	Dytiscidae	Coleoptera	Insecta	E	A_END	P	1	0	0	0	0	1	1
SMG-GR-T-03_PT-TU-S11	NFF Graminhais	Graminhais encosta	SMG-GR-T-03	26S	654557	4185354	BALA	1999	August	Turquin	PT-TU-S11	285	Agabus godmani Crotch	Agabus	godmani		Crotch, 1867	Dytiscidae	Coleoptera	Insecta	E	A_END	P	1	0	0	0	0	1	1
SMG-GR-T-15_PT-TU-S11	NFF Graminhais	Veg baixa e fechada	SMG-GR-T-15	26S	654385	4185571	PhD Clara	2004	June	Turquin	PT-TU-S11	285	Agabus godmani Crotch	Agabus	godmani		Crotch, 1867	Dytiscidae	Coleoptera	Insecta	E	A_END	P	1	0	0	0	0	1	1
TER-SB-T-09_PT-TU-S01	NFF Serra Sta. Bárbara	Cume	TER-SB-T-09	26S	473218	4287447	BALA	1999	August	Turquin	PT-TU-S01	337	Agrotis ipsilon (Hufnagel)	Agrotis	ipsilon		(Hufnagel, 1766)	Noctuidae	Lepidoptera	Insecta	N		H	1	0	0	0	0	1	1
TER-SB-T-09_PT-ET-S20	NFF Serra Sta. Bárbara	Cume	TER-SB-T-09	26S	473218	4287447	BALA	1999	August	Ethylene	PT-ET-S20	337	Agrotis ipsilon (Hufnagel)	Agrotis	ipsilon		(Hufnagel, 1766)	Noctuidae	Lepidoptera	Insecta	N		H	1	0	0	0	0	1	1
TER-SB-T-09_PT-ET-S26	NFF Serra Sta. Bárbara	Cume	TER-SB-T-09	26S	473218	4287447	BALA	1999	August	Ethylene	PT-ET-S26	337	Agrotis ipsilon (Hufnagel)	Agrotis	ipsilon		(Hufnagel, 1766)	Noctuidae	Lepidoptera	Insecta	N		H	1	0	0	0	0	1	1
FLO-MA-T-05_PT-TU-S09	NFF Morro Alto e Pico da Sé	Encosta Caldeira Branca	FLO-MA-T-05	25S	137340	4375246	BALA	1999	July	Turquin	PT-TU-S09	22	Agyneta decora (O.P.-Cambridge)	Agyneta	decora		(O. P.-Cambridge, 1871)	Linyphiidae	Araneae	Arachnida	I		P	0	1	0	0	0	1	1
FLO-MA-T-05_PT-TU-S05	NFF Morro Alto e Pico da Sé	Encosta Caldeira Branca	FLO-MA-T-05	25S	137340	4375246	BALA	1999	July	Turquin	PT-TU-S05	22	Agyneta decora (O.P.-Cambridge)	Agyneta	decora		(O. P.-Cambridge, 1871)	Linyphiidae	Araneae	Arachnida	I		P	0	1	0	0	0	1	1
FLO-MA-T-05_PT-TU-S11	NFF Morro Alto e Pico da Sé	Encosta Caldeira Branca	FLO-MA-T-05	25S	137340	4375246	BALA	1999	July	Turquin	PT-TU-S11	22	Agyneta decora (O.P.-Cambridge)	Agyneta	decora		(O. P.-Cambridge, 1871)	Linyphiidae	Araneae	Arachnida	I		P	0	1	0	0	0	1	1
FLO-MA-T-05_PT-TU-S03	NFF Morro Alto e Pico da Sé	Encosta Caldeira Branca	FLO-MA-T-05	25S	137340	4375246	BALA	1999	July	Turquin	PT-TU-S03	22	Agyneta decora (O.P.-Cambridge)	Agyneta	decora		(O. P.-Cambridge, 1871)	Linyphiidae	Araneae	Arachnida	I		P	0	0	1	0	0	1	1
FLO-MA-T-05_PT-ET-S20	NFF Morro Alto e Pico da Sé	Encosta Caldeira Branca	FLO-MA-T-05	25S	137340	4375246	BALA	1999	July	Ethylene	PT-ET-S20	22	Agyneta decora (O.P.-Cambridge)	Agyneta	decora		(O. P.-Cambridge, 1871)	Linyphiidae	Araneae	Arachnida	I		P	0	0	1	0	0	1	1
FLO-MA-T-05_PT-ET-S28	NFF Morro Alto e Pico da Sé	Encosta Caldeira Branca	FLO-MA-T-05	25S	137340	4375246	BALA	1999	July	Ethylene	PT-ET-S28	22	Agyneta decora (O.P.-Cambridge)	Agyneta	decora		(O. P.-Cambridge, 1871)	Linyphiidae	Araneae	Arachnida	I		P	0	3	0	0	0	3	3
FLO-MA-T-05_PT-ET-S06	NFF Morro Alto e Pico da Sé	Encosta Caldeira Branca	FLO-MA-T-05	25S	137340	4375246	BALA	1999	July	Ethylene	PT-ET-S06	22	Agyneta decora (O.P.-Cambridge)	Agyneta	decora		(O. P.-Cambridge, 1871)	Linyphiidae	Araneae	Arachnida	I		P	0	1	0	1	0	2	1
FLO-MA-T-05_PT-ET-S08	NFF Morro Alto e Pico da Sé	Encosta Caldeira Branca	FLO-MA-T-05	25S	137340	4375246	BALA	1999	July	Ethylene	PT-ET-S08	22	Agyneta decora (O.P.-Cambridge)	Agyneta	decora		(O. P.-Cambridge, 1871)	Linyphiidae	Araneae	Arachnida	I		P	0	1	1	0	0	2	2
FLO-MA-T-14_PT-TU-S05	NFF Morro Alto e Pico da Sé	Caldeira Comprida	FLO-MA-T-14	25S	137246	4374777	BALA	2000	September	Turquin	PT-TU-S05	22	Agyneta decora (O.P.-Cambridge)	Agyneta	decora		(O. P.-Cambridge, 1871)	Linyphiidae	Araneae	Arachnida	I		P	0	1	0	0	0	1	1
FLO-MA-T-16_PT-TU-S17	NFF Morro Alto e Pico da Sé	Ribeira do Cascalho	FLO-MA-T-16	25S	139699	4378652	BALA	2000	September	Turquin	PT-TU-S17	22	Agyneta decora (O.P.-Cambridge)	Agyneta	decora		(O. P.-Cambridge, 1871)	Linyphiidae	Araneae	Arachnida	I		P	0	0	0	1	0	1	0
FLO-MA-T-16_PT-TU-S21	NFF Morro Alto e Pico da Sé	Ribeira do Cascalho	FLO-MA-T-16	25S	139699	4378652	BALA	2000	September	Turquin	PT-TU-S21	22	Agyneta decora (O.P.-Cambridge)	Agyneta	decora		(O. P.-Cambridge, 1871)	Linyphiidae	Araneae	Arachnida	I		P	0	1	0	0	0	1	1
FLO-MA-T-16_PT-ET-S10	NFF Morro Alto e Pico da Sé	Ribeira do Cascalho	FLO-MA-T-16	25S	139699	4378652	BALA	2000	September	Ethylene	PT-ET-S10	22	Agyneta decora (O.P.-Cambridge)	Agyneta	decora		(O. P.-Cambridge, 1871)	Linyphiidae	Araneae	Arachnida	I		P	0	0	1	0	0	1	1
FLO-MA-T-16_PT-ET-S14	NFF Morro Alto e Pico da Sé	Ribeira do Cascalho	FLO-MA-T-16	25S	139699	4378652	BALA	2000	September	Ethylene	PT-ET-S14	22	Agyneta decora (O.P.-Cambridge)	Agyneta	decora		(O. P.-Cambridge, 1871)	Linyphiidae	Araneae	Arachnida	I		P	0	0	1	0	0	1	1
FLO-MA-T-16_PT-ET-S12	NFF Morro Alto e Pico da Sé	Ribeira do Cascalho	FLO-MA-T-16	25S	139699	4378652	BALA2	2010	July	Ethylene	PT-ET-S12	22	Agyneta decora (O.P.-Cambridge)	Agyneta	decora		(O. P.-Cambridge, 1871)	Linyphiidae	Araneae	Arachnida	I		P	0	0	1	0	0	1	1
SJG-TO-T-06_PT-TU-S29	NFF Topo	Mata Estado C	SJG-TO-T-06	26S	422089	4271756	BALA	1999	July	Turquin	PT-TU-S29	22	Agyneta decora (O.P.-Cambridge)	Agyneta	decora		(O. P.-Cambridge, 1871)	Linyphiidae	Araneae	Arachnida	I		P	0	0	0	1	0	1	0
SJG-TO-T-12_PT-TU-S13	NFF Topo	Mata Estado C2	SJG-TO-T-12	26S	421857	4272031	BALA	2000	August	Turquin	PT-TU-S13	22	Agyneta decora (O.P.-Cambridge)	Agyneta	decora		(O. P.-Cambridge, 1871)	Linyphiidae	Araneae	Arachnida	I		P	0	0	1	0	0	1	1
SJG-TO-T-12_PT-ET-S04	NFF Topo	Mata Estado C2	SJG-TO-T-12	26S	421857	4272031	BALA	2000	August	Ethylene	PT-ET-S04	22	Agyneta decora (O.P.-Cambridge)	Agyneta	decora		(O. P.-Cambridge, 1871)	Linyphiidae	Araneae	Arachnida	I		P	0	1	0	0	0	1	1
SJG-TO-T-15_PT-ET-S22	NFF Topo	Topo juniperal	SJG-TO-T-15	26S	422255	4271216	PhD Clara	2004	July	Ethylene	PT-ET-S22	22	Agyneta decora (O.P.-Cambridge)	Agyneta	decora		(O. P.-Cambridge, 1871)	Linyphiidae	Araneae	Arachnida	I		P	0	1	0	0	0	1	1
SJG-TO-T-16_PT-ET-S18	NFF Topo	Topo Euphorbia	SJG-TO-T-16	26S	422871	4271075	PhD Clara	2004	July	Ethylene	PT-ET-S18	22	Agyneta decora (O.P.-Cambridge)	Agyneta	decora		(O. P.-Cambridge, 1871)	Linyphiidae	Araneae	Arachnida	I		P	0	1	0	0	0	1	1
TER-BF-T-38_PT-ET-S28	NFF Biscoito da Ferraria	Labaçal erical	TER-BF-T-38	26S	480778	4290662	PhD Clara	2003	June	Ethylene	PT-ET-S28	22	Agyneta decora (O.P.-Cambridge)	Agyneta	decora		(O. P.-Cambridge, 1871)	Linyphiidae	Araneae	Arachnida	I		P	0	1	0	0	0	1	1
TER-BF-T-38_PT-TU-S13	NFF Biscoito da Ferraria	Labaçal erical	TER-BF-T-38	26S	480778	4290662	PhD Clara	2003	June	Turquin	PT-TU-S13	22	Agyneta decora (O.P.-Cambridge)	Agyneta	decora		(O. P.-Cambridge, 1871)	Linyphiidae	Araneae	Arachnida	I		P	0	1	0	0	0	1	1
TER-PG-T-33_PT-ET-S30	NFF Pico Galhardo	Pico X B	TER-PG-T-33	26S	480249	4287288	BALA2	2010	June	Ethylene	PT-ET-S30	22	Agyneta decora (O.P.-Cambridge)	Agyneta	decora		(O. P.-Cambridge, 1871)	Linyphiidae	Araneae	Arachnida	I		P	0	0	1	0	0	1	1
TER-SB-T-07_PT-TU-S01	NFF Serra Sta. Bárbara	Lomba	TER-SB-T-07	26S	474700	4287863	BALA	1999	July	Turquin	PT-TU-S01	22	Agyneta decora (O.P.-Cambridge)	Agyneta	decora		(O. P.-Cambridge, 1871)	Linyphiidae	Araneae	Arachnida	I		P	0	0	2	0	0	2	2
TER-SB-T-11_PT-TU-S23	NFF Serra Sta. Bárbara	Caldeira A	TER-SB-T-11	26S	472028	4288949	BALA	2001	July	Turquin	PT-TU-S23	22	Agyneta decora (O.P.-Cambridge)	Agyneta	decora		(O. P.-Cambridge, 1871)	Linyphiidae	Araneae	Arachnida	I		P	0	0	1	0	0	1	1
TER-SB-T-47_PT-TU-S11	NFF Serra Sta. Bárbara	Caldeira B	TER-SB-T-47	26S	472890	4287587	PhD Clara	2003	August	Turquin	PT-TU-S11	22	Agyneta decora (O.P.-Cambridge)	Agyneta	decora		(O. P.-Cambridge, 1871)	Linyphiidae	Araneae	Arachnida	I		P	0	0	1	0	0	1	1
TER-SB-T-47_PT-TU-S17	NFF Serra Sta. Bárbara	Caldeira B	TER-SB-T-47	26S	472890	4287587	PhD Clara	2003	August	Turquin	PT-TU-S17	22	Agyneta decora (O.P.-Cambridge)	Agyneta	decora		(O. P.-Cambridge, 1871)	Linyphiidae	Araneae	Arachnida	I		P	0	0	0	1	0	1	0
TER-SB-TE48_PT-TU-S59	NFF Serra Sta. Bárbara	Lagoinha B	TER-SB-TE48	26S	471172	4289221	PhD Clara	2003	July	Turquin	PT-TU-S59	22	Agyneta decora (O.P.-Cambridge)	Agyneta	decora		(O. P.-Cambridge, 1871)	Linyphiidae	Araneae	Arachnida	I		P	0	1	0	0	0	1	1
TER-SB-TE49_PT-TU-S09	NFF Serra Sta. Bárbara	Pinheiro B	TER-SB-TE49	26S	472292	428880	PhD Clara	2003	July	Turquin	PT-TU-S09	22	Agyneta decora (O.P.-Cambridge)	Agyneta	decora		(O. P.-Cambridge, 1871)	Linyphiidae	Araneae	Arachnida	I		P	0	0	1	0	0	1	1
TER-SB-TE50_PT-TU-S09	NFF Serra Sta. Bárbara	Pinheiro Rachado	TER-SB-TE50	26S	472428	4289636	PhD Clara	2003	September	Turquin	PT-TU-S09	22	Agyneta decora (O.P.-Cambridge)	Agyneta	decora		(O. P.-Cambridge, 1871)	Linyphiidae	Araneae	Arachnida	I		P	0	1	0	0	0	1	1
TER-SB-TY11_PT-ET-S22	NFF Serra Sta. Bárbara	Caldeira A	TER-SB-TY11	26S	472028	4288949	PhD Clara	2003	July	Ethylene	PT-ET-S22	22	Agyneta decora (O.P.-Cambridge)	Agyneta	decora		(O. P.-Cambridge, 1871)	Linyphiidae	Araneae	Arachnida	I		P	0	0	1	0	0	1	1
TER-TB-T-15_PT-TU-S11	NFF Terra Brava	Terra Brava A	TER-TB-T-15	26S	482438	4287412	BALA	1999	August	Turquin	PT-TU-S11	22	Agyneta decora (O.P.-Cambridge)	Agyneta	decora		(O. P.-Cambridge, 1871)	Linyphiidae	Araneae	Arachnida	I		P	0	0	1	0	0	1	1
TER-TB-T-15_PT-TU-S15	NFF Terra Brava	Terra Brava A	TER-TB-T-15	26S	482438	4287412	BALA	1999	August	Turquin	PT-TU-S15	22	Agyneta decora (O.P.-Cambridge)	Agyneta	decora		(O. P.-Cambridge, 1871)	Linyphiidae	Araneae	Arachnida	I		P	0	2	0	0	0	2	2
FLO-FR-T-06_PT-ET-S16	NFF Caldeiras Funda e Rasa	Juniperal	FLO-FR-T-06	25S	136738	4370215	BALA2	2010	July	Ethylene	PT-ET-S16	313	Agyneta depigmentata Wunderlich	Agyneta	depigmentata		Wunderlich, 2008	Linyphiidae	Araneae	Arachnida	E	SIE	P	0	0	0	1	0	1	0
FLO-FR-T-06_PT-TU-S27	NFF Caldeiras Funda e Rasa	Juniperal	FLO-FR-T-06	25S	136738	4370215	BALA2	2010	July	Turquin	PT-TU-S27	313	Agyneta depigmentata Wunderlich	Agyneta	depigmentata		Wunderlich, 2008	Linyphiidae	Araneae	Arachnida	E	SIE	P	0	0	0	1	0	1	0
FLO-FR-T-07_PT-ET-S24	NFF Caldeiras Funda e Rasa	Encosta Caldeira Funda	FLO-FR-T-07	25S	136817	4370019	BALA2	2010	July	Ethylene	PT-ET-S24	313	Agyneta depigmentata Wunderlich	Agyneta	depigmentata		Wunderlich, 2008	Linyphiidae	Araneae	Arachnida	E	SIE	P	0	0	1	0	0	1	1
FLO-FR-T-07_PT-ET-S12	NFF Caldeiras Funda e Rasa	Encosta Caldeira Funda	FLO-FR-T-07	25S	136817	4370019	BALA2	2010	July	Ethylene	PT-ET-S12	313	Agyneta depigmentata Wunderlich	Agyneta	depigmentata		Wunderlich, 2008	Linyphiidae	Araneae	Arachnida	E	SIE	P	0	0	0	1	0	1	0
FLO-FR-T-07_PT-ET-S04	NFF Caldeiras Funda e Rasa	Encosta Caldeira Funda	FLO-FR-T-07	25S	136817	4370019	BALA2	2010	July	Ethylene	PT-ET-S04	313	Agyneta depigmentata Wunderlich	Agyneta	depigmentata		Wunderlich, 2008	Linyphiidae	Araneae	Arachnida	E	SIE	P	0	1	0	0	0	1	1
FLO-MA-T-03_PT-TU-S19	NFF Morro Alto e Pico da Sé	Caldeira Branca margem ribeira	FLO-MA-T-03	25S	136183	4374629	BALA	1999	July	Turquin	PT-TU-S19	313	Agyneta depigmentata Wunderlich	Agyneta	depigmentata		Wunderlich, 2008	Linyphiidae	Araneae	Arachnida	E	SIE	P	0	0	0	1	0	1	0
FLO-MA-T-03_PT-TU-S27	NFF Morro Alto e Pico da Sé	Caldeira Branca margem ribeira	FLO-MA-T-03	25S	136183	4374629	BALA	1999	July	Turquin	PT-TU-S27	313	Agyneta depigmentata Wunderlich	Agyneta	depigmentata		Wunderlich, 2008	Linyphiidae	Araneae	Arachnida	E	SIE	P	0	1	0	0	0	1	1
FLO-MA-T-03_PT-TU-S15	NFF Morro Alto e Pico da Sé	Caldeira Branca margem ribeira	FLO-MA-T-03	25S	136183	4374629	BALA	1999	July	Turquin	PT-TU-S15	313	Agyneta depigmentata Wunderlich	Agyneta	depigmentata		Wunderlich, 2008	Linyphiidae	Araneae	Arachnida	E	SIE	P	0	0	2	2	0	4	2
FLO-MA-T-03_PT-ET-S26	NFF Morro Alto e Pico da Sé	Caldeira Branca margem ribeira	FLO-MA-T-03	25S	136183	4374629	BALA	1999	July	Ethylene	PT-ET-S26	313	Agyneta depigmentata Wunderlich	Agyneta	depigmentata		Wunderlich, 2008	Linyphiidae	Araneae	Arachnida	E	SIE	P	0	0	1	0	0	1	1
FLO-MA-T-03_PT-ET-S20	NFF Morro Alto e Pico da Sé	Caldeira Branca margem ribeira	FLO-MA-T-03	25S	136183	4374629	BALA	1999	July	Ethylene	PT-ET-S20	313	Agyneta depigmentata Wunderlich	Agyneta	depigmentata		Wunderlich, 2008	Linyphiidae	Araneae	Arachnida	E	SIE	P	0	0	1	0	0	1	1
FLO-MA-T-04_PT-TU-S15	NFF Morro Alto e Pico da Sé	Ribeira da Fazenda	FLO-MA-T-04	25S	138309	4377246	BALA	1999	July	Turquin	PT-TU-S15	313	Agyneta depigmentata Wunderlich	Agyneta	depigmentata		Wunderlich, 2008	Linyphiidae	Araneae	Arachnida	E	SIE	P	0	0	0	1	0	1	0
FLO-MA-T-04_PT-TU-S19	NFF Morro Alto e Pico da Sé	Ribeira da Fazenda	FLO-MA-T-04	25S	138309	4377246	BALA	1999	July	Turquin	PT-TU-S19	313	Agyneta depigmentata Wunderlich	Agyneta	depigmentata		Wunderlich, 2008	Linyphiidae	Araneae	Arachnida	E	SIE	P	0	1	0	3	0	4	1
FLO-MA-T-04_PT-TU-S23	NFF Morro Alto e Pico da Sé	Ribeira da Fazenda	FLO-MA-T-04	25S	138309	4377246	BALA	1999	July	Turquin	PT-TU-S23	313	Agyneta depigmentata Wunderlich	Agyneta	depigmentata		Wunderlich, 2008	Linyphiidae	Araneae	Arachnida	E	SIE	P	0	0	0	5	0	5	0
FLO-MA-T-04_PT-TU-S17	NFF Morro Alto e Pico da Sé	Ribeira da Fazenda	FLO-MA-T-04	25S	138309	4377246	BALA	1999	July	Turquin	PT-TU-S17	313	Agyneta depigmentata Wunderlich	Agyneta	depigmentata		Wunderlich, 2008	Linyphiidae	Araneae	Arachnida	E	SIE	P	0	0	0	2	0	2	0
FLO-MA-T-04_PT-TU-S27	NFF Morro Alto e Pico da Sé	Ribeira da Fazenda	FLO-MA-T-04	25S	138309	4377246	BALA	1999	July	Turquin	PT-TU-S27	313	Agyneta depigmentata Wunderlich	Agyneta	depigmentata		Wunderlich, 2008	Linyphiidae	Araneae	Arachnida	E	SIE	P	0	0	0	2	0	2	0
FLO-MA-T-04_PT-TU-S11	NFF Morro Alto e Pico da Sé	Ribeira da Fazenda	FLO-MA-T-04	25S	138309	4377246	BALA	1999	July	Turquin	PT-TU-S11	313	Agyneta depigmentata Wunderlich	Agyneta	depigmentata		Wunderlich, 2008	Linyphiidae	Araneae	Arachnida	E	SIE	P	0	0	0	5	0	5	0
FLO-MA-T-04_PT-TU-S29	NFF Morro Alto e Pico da Sé	Ribeira da Fazenda	FLO-MA-T-04	25S	138309	4377246	BALA	1999	July	Turquin	PT-TU-S29	313	Agyneta depigmentata Wunderlich	Agyneta	depigmentata		Wunderlich, 2008	Linyphiidae	Araneae	Arachnida	E	SIE	P	0	1	0	0	0	1	1
FLO-MA-T-04_PT-TU-S01	NFF Morro Alto e Pico da Sé	Ribeira da Fazenda	FLO-MA-T-04	25S	138309	4377246	BALA	1999	July	Turquin	PT-TU-S01	313	Agyneta depigmentata Wunderlich	Agyneta	depigmentata		Wunderlich, 2008	Linyphiidae	Araneae	Arachnida	E	SIE	P	0	0	0	4	0	4	0
FLO-MA-T-04_PT-TU-S03	NFF Morro Alto e Pico da Sé	Ribeira da Fazenda	FLO-MA-T-04	25S	138309	4377246	BALA	1999	July	Turquin	PT-TU-S03	313	Agyneta depigmentata Wunderlich	Agyneta	depigmentata		Wunderlich, 2008	Linyphiidae	Araneae	Arachnida	E	SIE	P	0	0	2	0	0	2	2
FLO-MA-T-04_PT-TU-S19	NFF Morro Alto e Pico da Sé	Ribeira da Fazenda	FLO-MA-T-04	25S	138309	4377246	BALA	1999	July	Turquin	PT-TU-S19	313	Agyneta depigmentata Wunderlich	Agyneta	depigmentata		Wunderlich, 2008	Linyphiidae	Araneae	Arachnida	E	SIE	P	0	0	0	2	0	2	0
FLO-MA-T-04_PT-TU-S23	NFF Morro Alto e Pico da Sé	Ribeira da Fazenda	FLO-MA-T-04	25S	138309	4377246	BALA	1999	July	Turquin	PT-TU-S23	313	Agyneta depigmentata Wunderlich	Agyneta	depigmentata		Wunderlich, 2008	Linyphiidae	Araneae	Arachnida	E	SIE	P	0	0	0	1	0	1	0
FLO-MA-T-04_PT-TU-S27	NFF Morro Alto e Pico da Sé	Ribeira da Fazenda	FLO-MA-T-04	25S	138309	4377246	BALA	1999	July	Turquin	PT-TU-S27	313	Agyneta depigmentata Wunderlich	Agyneta	depigmentata		Wunderlich, 2008	Linyphiidae	Araneae	Arachnida	E	SIE	P	0	0	0	2	0	2	0
FLO-MA-T-04_PT-TU-S11	NFF Morro Alto e Pico da Sé	Ribeira da Fazenda	FLO-MA-T-04	25S	138309	4377246	BALA	1999	July	Turquin	PT-TU-S11	313	Agyneta depigmentata Wunderlich	Agyneta	depigmentata		Wunderlich, 2008	Linyphiidae	Araneae	Arachnida	E	SIE	P	0	0	1	5	0	6	1
FLO-MA-T-04_PT-TU-S29	NFF Morro Alto e Pico da Sé	Ribeira da Fazenda	FLO-MA-T-04	25S	138309	4377246	BALA	1999	July	Turquin	PT-TU-S29	313	Agyneta depigmentata Wunderlich	Agyneta	depigmentata		Wunderlich, 2008	Linyphiidae	Araneae	Arachnida	E	SIE	P	0	0	1	0	0	1	1
FLO-MA-T-04_PT-TU-S21	NFF Morro Alto e Pico da Sé	Ribeira da Fazenda	FLO-MA-T-04	25S	138309	4377246	BALA	1999	July	Turquin	PT-TU-S21	313	Agyneta depigmentata Wunderlich	Agyneta	depigmentata		Wunderlich, 2008	Linyphiidae	Araneae	Arachnida	E	SIE	P	0	0	0	2	0	2	0
FLO-MA-T-04_PT-TU-S25	NFF Morro Alto e Pico da Sé	Ribeira da Fazenda	FLO-MA-T-04	25S	138309	4377246	BALA	1999	July	Turquin	PT-TU-S25	313	Agyneta depigmentata Wunderlich	Agyneta	depigmentata		Wunderlich, 2008	Linyphiidae	Araneae	Arachnida	E	SIE	P	0	0	0	1	0	1	0
FLO-MA-T-04_PT-ET-S04	NFF Morro Alto e Pico da Sé	Ribeira da Fazenda	FLO-MA-T-04	25S	138309	4377246	BALA	1999	July	Ethylene	PT-ET-S04	313	Agyneta depigmentata Wunderlich	Agyneta	depigmentata		Wunderlich, 2008	Linyphiidae	Araneae	Arachnida	E	SIE	P	0	0	0	1	0	1	0
FLO-MA-T-04_PT-ET-S10	NFF Morro Alto e Pico da Sé	Ribeira da Fazenda	FLO-MA-T-04	25S	138309	4377246	BALA	1999	July	Ethylene	PT-ET-S10	313	Agyneta depigmentata Wunderlich	Agyneta	depigmentata		Wunderlich, 2008	Linyphiidae	Araneae	Arachnida	E	SIE	P	0	1	0	3	0	4	1
FLO-MA-T-04_PT-ET-S18	NFF Morro Alto e Pico da Sé	Ribeira da Fazenda	FLO-MA-T-04	25S	138309	4377246	BALA	1999	July	Ethylene	PT-ET-S18	313	Agyneta depigmentata Wunderlich	Agyneta	depigmentata		Wunderlich, 2008	Linyphiidae	Araneae	Arachnida	E	SIE	P	0	0	0	5	0	5	0
FLO-MA-T-04_PT-ET-S30	NFF Morro Alto e Pico da Sé	Ribeira da Fazenda	FLO-MA-T-04	25S	138309	4377246	BALA	1999	July	Ethylene	PT-ET-S30	313	Agyneta depigmentata Wunderlich	Agyneta	depigmentata		Wunderlich, 2008	Linyphiidae	Araneae	Arachnida	E	SIE	P	0	0	0	3	0	3	0
FLO-MA-T-04_PT-ET-S14	NFF Morro Alto e Pico da Sé	Ribeira da Fazenda	FLO-MA-T-04	25S	138309	4377246	BALA	1999	July	Ethylene	PT-ET-S14	313	Agyneta depigmentata Wunderlich	Agyneta	depigmentata		Wunderlich, 2008	Linyphiidae	Araneae	Arachnida	E	SIE	P	0	0	1	2	0	3	1
FLO-MA-T-04_PT-ET-S28	NFF Morro Alto e Pico da Sé	Ribeira da Fazenda	FLO-MA-T-04	25S	138309	4377246	BALA	1999	July	Ethylene	PT-ET-S28	313	Agyneta depigmentata Wunderlich	Agyneta	depigmentata		Wunderlich, 2008	Linyphiidae	Araneae	Arachnida	E	SIE	P	0	1	0	0	0	1	1
FLO-MA-T-04_PT-ET-S24	NFF Morro Alto e Pico da Sé	Ribeira da Fazenda	FLO-MA-T-04	25S	138309	4377246	BALA	1999	July	Ethylene	PT-ET-S24	313	Agyneta depigmentata Wunderlich	Agyneta	depigmentata		Wunderlich, 2008	Linyphiidae	Araneae	Arachnida	E	SIE	P	0	0	4	14	0	18	4
FLO-MA-T-04_PT-ET-S06	NFF Morro Alto e Pico da Sé	Ribeira da Fazenda	FLO-MA-T-04	25S	138309	4377246	BALA	1999	July	Ethylene	PT-ET-S06	313	Agyneta depigmentata Wunderlich	Agyneta	depigmentata		Wunderlich, 2008	Linyphiidae	Araneae	Arachnida	E	SIE	P	0	0	0	2	0	2	0
FLO-MA-T-04_PT-ET-S12	NFF Morro Alto e Pico da Sé	Ribeira da Fazenda	FLO-MA-T-04	25S	138309	4377246	BALA	1999	July	Ethylene	PT-ET-S12	313	Agyneta depigmentata Wunderlich	Agyneta	depigmentata		Wunderlich, 2008	Linyphiidae	Araneae	Arachnida	E	SIE	P	0	0	0	4	0	4	0
FLO-MA-T-04_PT-ET-S26	NFF Morro Alto e Pico da Sé	Ribeira da Fazenda	FLO-MA-T-04	25S	138309	4377246	BALA	1999	July	Ethylene	PT-ET-S26	313	Agyneta depigmentata Wunderlich	Agyneta	depigmentata		Wunderlich, 2008	Linyphiidae	Araneae	Arachnida	E	SIE	P	0	1	0	2	0	3	1
FLO-MA-T-04_PT-ET-S22	NFF Morro Alto e Pico da Sé	Ribeira da Fazenda	FLO-MA-T-04	25S	138309	4377246	BALA	1999	July	Ethylene	PT-ET-S22	313	Agyneta depigmentata Wunderlich	Agyneta	depigmentata		Wunderlich, 2008	Linyphiidae	Araneae	Arachnida	E	SIE	P	0	0	2	0	0	2	2
FLO-MA-T-04_PT-ET-S08	NFF Morro Alto e Pico da Sé	Ribeira da Fazenda	FLO-MA-T-04	25S	138309	4377246	BALA	1999	July	Ethylene	PT-ET-S08	313	Agyneta depigmentata Wunderlich	Agyneta	depigmentata		Wunderlich, 2008	Linyphiidae	Araneae	Arachnida	E	SIE	P	0	0	0	1	0	1	0
FLO-MA-T-08_PT-TU-S05	NFF Morro Alto e Pico da Sé	Morro Alto Este	FLO-MA-T-08	25S	137809	4376293	BALA	1999	July	Turquin	PT-TU-S05	313	Agyneta depigmentata Wunderlich	Agyneta	depigmentata		Wunderlich, 2008	Linyphiidae	Araneae	Arachnida	E	SIE	P	0	0	1	0	0	1	1
FLO-MA-T-08_PT-TU-S09	NFF Morro Alto e Pico da Sé	Morro Alto Este	FLO-MA-T-08	25S	137809	4376293	BALA	1999	July	Turquin	PT-TU-S09	313	Agyneta depigmentata Wunderlich	Agyneta	depigmentata		Wunderlich, 2008	Linyphiidae	Araneae	Arachnida	E	SIE	P	0	0	0	1	0	1	0
FLO-MA-T-08_PT-TU-S27	NFF Morro Alto e Pico da Sé	Morro Alto Este	FLO-MA-T-08	25S	137809	4376293	BALA	1999	July	Turquin	PT-TU-S27	313	Agyneta depigmentata Wunderlich	Agyneta	depigmentata		Wunderlich, 2008	Linyphiidae	Araneae	Arachnida	E	SIE	P	0	0	1	8	0	9	1
FLO-MA-T-08_PT-TU-S07	NFF Morro Alto e Pico da Sé	Morro Alto Este	FLO-MA-T-08	25S	137809	4376293	BALA	1999	July	Turquin	PT-TU-S07	313	Agyneta depigmentata Wunderlich	Agyneta	depigmentata		Wunderlich, 2008	Linyphiidae	Araneae	Arachnida	E	SIE	P	0	0	0	1	0	1	0
FLO-MA-T-08_PT-TU-S29	NFF Morro Alto e Pico da Sé	Morro Alto Este	FLO-MA-T-08	25S	137809	4376293	BALA	1999	July	Turquin	PT-TU-S29	313	Agyneta depigmentata Wunderlich	Agyneta	depigmentata		Wunderlich, 2008	Linyphiidae	Araneae	Arachnida	E	SIE	P	0	1	0	3	0	4	1
FLO-MA-T-08_PT-TU-S11	NFF Morro Alto e Pico da Sé	Morro Alto Este	FLO-MA-T-08	25S	137809	4376293	BALA	1999	July	Turquin	PT-TU-S11	313	Agyneta depigmentata Wunderlich	Agyneta	depigmentata		Wunderlich, 2008	Linyphiidae	Araneae	Arachnida	E	SIE	P	0	0	0	3	0	3	0
FLO-MA-T-08_PT-TU-S21	NFF Morro Alto e Pico da Sé	Morro Alto Este	FLO-MA-T-08	25S	137809	4376293	BALA	1999	July	Turquin	PT-TU-S21	313	Agyneta depigmentata Wunderlich	Agyneta	depigmentata		Wunderlich, 2008	Linyphiidae	Araneae	Arachnida	E	SIE	P	0	1	4	13	0	18	5
FLO-MA-T-08_PT-TU-S21	NFF Morro Alto e Pico da Sé	Morro Alto Este	FLO-MA-T-08	25S	137809	4376293	BALA	1999	July	Turquin	PT-TU-S21	313	Agyneta depigmentata Wunderlich	Agyneta	depigmentata		Wunderlich, 2008	Linyphiidae	Araneae	Arachnida	E	SIE	P	0	0	1	0	0	1	1
FLO-MA-T-08_PT-ET-S28	NFF Morro Alto e Pico da Sé	Morro Alto Este	FLO-MA-T-08	25S	137809	4376293	BALA	1999	July	Ethylene	PT-ET-S28	313	Agyneta depigmentata Wunderlich	Agyneta	depigmentata		Wunderlich, 2008	Linyphiidae	Araneae	Arachnida	E	SIE	P	0	0	0	1	0	1	0
FLO-MA-T-08_PT-ET-S14	NFF Morro Alto e Pico da Sé	Morro Alto Este	FLO-MA-T-08	25S	137809	4376293	BALA	1999	July	Ethylene	PT-ET-S14	313	Agyneta depigmentata Wunderlich	Agyneta	depigmentata		Wunderlich, 2008	Linyphiidae	Araneae	Arachnida	E	SIE	P	0	0	2	2	0	4	2
FLO-MA-T-08_PT-ET-S30	NFF Morro Alto e Pico da Sé	Morro Alto Este	FLO-MA-T-08	25S	137809	4376293	BALA	1999	July	Ethylene	PT-ET-S30	313	Agyneta depigmentata Wunderlich	Agyneta	depigmentata		Wunderlich, 2008	Linyphiidae	Araneae	Arachnida	E	SIE	P	0	0	0	1	0	1	0
FLO-MA-T-08_PT-ET-S16	NFF Morro Alto e Pico da Sé	Morro Alto Este	FLO-MA-T-08	25S	137809	4376293	BALA	1999	July	Ethylene	PT-ET-S16	313	Agyneta depigmentata Wunderlich	Agyneta	depigmentata		Wunderlich, 2008	Linyphiidae	Araneae	Arachnida	E	SIE	P	0	0	0	1	0	1	0
FLO-MA-T-08_PT-ET-S26	NFF Morro Alto e Pico da Sé	Morro Alto Este	FLO-MA-T-08	25S	137809	4376293	BALA	1999	July	Ethylene	PT-ET-S26	313	Agyneta depigmentata Wunderlich	Agyneta	depigmentata		Wunderlich, 2008	Linyphiidae	Araneae	Arachnida	E	SIE	P	0	0	0	3	0	3	0
FLO-MA-T-08_PT-ET-S08	NFF Morro Alto e Pico da Sé	Morro Alto Este	FLO-MA-T-08	25S	137809	4376293	BALA2	2010	July	Ethylene	PT-ET-S08	313	Agyneta depigmentata Wunderlich	Agyneta	depigmentata		Wunderlich, 2008	Linyphiidae	Araneae	Arachnida	E	SIE	P	0	1	0	0	0	1	1
FLO-MA-T-08_PT-ET-S18	NFF Morro Alto e Pico da Sé	Morro Alto Este	FLO-MA-T-08	25S	137809	4376293	BALA2	2010	July	Ethylene	PT-ET-S18	313	Agyneta depigmentata Wunderlich	Agyneta	depigmentata		Wunderlich, 2008	Linyphiidae	Araneae	Arachnida	E	SIE	P	0	0	0	1	0	1	0
FLO-MA-T-08_PT-ET-S22	NFF Morro Alto e Pico da Sé	Morro Alto Este	FLO-MA-T-08	25S	137809	4376293	BALA2	2010	July	Ethylene	PT-ET-S22	313	Agyneta depigmentata Wunderlich	Agyneta	depigmentata		Wunderlich, 2008	Linyphiidae	Araneae	Arachnida	E	SIE	P	0	0	0	1	0	1	0
FLO-MA-T-08_PT-TU-S07	NFF Morro Alto e Pico da Sé	Morro Alto Este	FLO-MA-T-08	25S	137809	4376293	BALA2	2010	July	Turquin	PT-TU-S07	313	Agyneta depigmentata Wunderlich	Agyneta	depigmentata		Wunderlich, 2008	Linyphiidae	Araneae	Arachnida	E	SIE	P	0	1	1	1	0	3	2
FLO-MA-T-08_PT-TU-S01	NFF Morro Alto e Pico da Sé	Morro Alto Este	FLO-MA-T-08	25S	137809	4376293	BALA2	2010	July	Turquin	PT-TU-S01	313	Agyneta depigmentata Wunderlich	Agyneta	depigmentata		Wunderlich, 2008	Linyphiidae	Araneae	Arachnida	E	SIE	P	0	0	0	1	0	1	0
FLO-MA-T-08_PT-TU-S21	NFF Morro Alto e Pico da Sé	Morro Alto Este	FLO-MA-T-08	25S	137809	4376293	BALA2	2010	July	Turquin	PT-TU-S21	313	Agyneta depigmentata Wunderlich	Agyneta	depigmentata		Wunderlich, 2008	Linyphiidae	Araneae	Arachnida	E	SIE	P	0	0	0	1	0	1	0
FLO-MA-T-08_PT-TU-S19	NFF Morro Alto e Pico da Sé	Morro Alto Este	FLO-MA-T-08	25S	137809	4376293	BALA2	2010	July	Turquin	PT-TU-S19	313	Agyneta depigmentata Wunderlich	Agyneta	depigmentata		Wunderlich, 2008	Linyphiidae	Araneae	Arachnida	E	SIE	P	0	0	0	1	0	1	0
FLO-MA-T-11_PT-TU-S01	NFF Morro Alto e Pico da Sé	Morro Alto encosta E	FLO-MA-T-11	25S	137113	4376856	BALA	2000	September	Turquin	PT-TU-S01	313	Agyneta depigmentata Wunderlich	Agyneta	depigmentata		Wunderlich, 2008	Linyphiidae	Araneae	Arachnida	E	SIE	P	0	0	0	1	0	1	0
FLO-MA-T-11_PT-TU-S05	NFF Morro Alto e Pico da Sé	Morro Alto encosta E	FLO-MA-T-11	25S	137113	4376856	BALA	2000	September	Turquin	PT-TU-S05	313	Agyneta depigmentata Wunderlich	Agyneta	depigmentata		Wunderlich, 2008	Linyphiidae	Araneae	Arachnida	E	SIE	P	0	0	0	1	0	1	0
FLO-MA-T-11_PT-TU-S29	NFF Morro Alto e Pico da Sé	Morro Alto encosta E	FLO-MA-T-11	25S	137113	4376856	BALA	2000	September	Turquin	PT-TU-S29	313	Agyneta depigmentata Wunderlich	Agyneta	depigmentata		Wunderlich, 2008	Linyphiidae	Araneae	Arachnida	E	SIE	P	0	0	0	2	0	2	0
FLO-MA-T-11_PT-TU-S21	NFF Morro Alto e Pico da Sé	Morro Alto encosta E	FLO-MA-T-11	25S	137113	4376856	BALA	2000	September	Turquin	PT-TU-S21	313	Agyneta depigmentata Wunderlich	Agyneta	depigmentata		Wunderlich, 2008	Linyphiidae	Araneae	Arachnida	E	SIE	P	0	0	0	1	0	1	0
FLO-MA-T-11_PT-TU-S25	NFF Morro Alto e Pico da Sé	Morro Alto encosta E	FLO-MA-T-11	25S	137113	4376856	BALA	2000	September	Turquin	PT-TU-S25	313	Agyneta depigmentata Wunderlich	Agyneta	depigmentata		Wunderlich, 2008	Linyphiidae	Araneae	Arachnida	E	SIE	P	0	1	0	1	0	2	1
FLO-MA-T-11_PT-TU-S27	NFF Morro Alto e Pico da Sé	Morro Alto encosta E	FLO-MA-T-11	25S	137113	4376856	BALA	2000	September	Turquin	PT-TU-S27	313	Agyneta depigmentata Wunderlich	Agyneta	depigmentata		Wunderlich, 2008	Linyphiidae	Araneae	Arachnida	E	SIE	P	0	0	0	1	0	1	0
FLO-MA-T-11_PT-TU-S11	NFF Morro Alto e Pico da Sé	Morro Alto encosta E	FLO-MA-T-11	25S	137113	4376856	BALA	2000	September	Turquin	PT-TU-S11	313	Agyneta depigmentata Wunderlich	Agyneta	depigmentata		Wunderlich, 2008	Linyphiidae	Araneae	Arachnida	E	SIE	P	0	1	1	0	0	2	2
FLO-MA-T-11_PT-TU-S03	NFF Morro Alto e Pico da Sé	Morro Alto encosta E	FLO-MA-T-11	25S	137113	4376856	BALA	2000	September	Turquin	PT-TU-S03	313	Agyneta depigmentata Wunderlich	Agyneta	depigmentata		Wunderlich, 2008	Linyphiidae	Araneae	Arachnida	E	SIE	P	0	0	0	2	0	2	0
FLO-MA-T-11_PT-TU-S15	NFF Morro Alto e Pico da Sé	Morro Alto encosta E	FLO-MA-T-11	25S	137113	4376856	BALA	2000	September	Turquin	PT-TU-S15	313	Agyneta depigmentata Wunderlich	Agyneta	depigmentata		Wunderlich, 2008	Linyphiidae	Araneae	Arachnida	E	SIE	P	0	0	0	1	0	1	0
FLO-MA-T-11_PT-TU-S05	NFF Morro Alto e Pico da Sé	Morro Alto encosta E	FLO-MA-T-11	25S	137113	4376856	BALA	2000	September	Turquin	PT-TU-S05	313	Agyneta depigmentata Wunderlich	Agyneta	depigmentata		Wunderlich, 2008	Linyphiidae	Araneae	Arachnida	E	SIE	P	0	0	0	1	0	1	0
FLO-MA-T-11_PT-TU-S23	NFF Morro Alto e Pico da Sé	Morro Alto encosta E	FLO-MA-T-11	25S	137113	4376856	BALA	2000	September	Turquin	PT-TU-S23	313	Agyneta depigmentata Wunderlich	Agyneta	depigmentata		Wunderlich, 2008	Linyphiidae	Araneae	Arachnida	E	SIE	P	0	0	0	1	0	1	0
FLO-MA-T-11_PT-TU-S21	NFF Morro Alto e Pico da Sé	Morro Alto encosta E	FLO-MA-T-11	25S	137113	4376856	BALA	2000	September	Turquin	PT-TU-S21	313	Agyneta depigmentata Wunderlich	Agyneta	depigmentata		Wunderlich, 2008	Linyphiidae	Araneae	Arachnida	E	SIE	P	0	0	0	1	0	1	0
FLO-MA-T-11_PT-TU-S25	NFF Morro Alto e Pico da Sé	Morro Alto encosta E	FLO-MA-T-11	25S	137113	4376856	BALA	2000	September	Turquin	PT-TU-S25	313	Agyneta depigmentata Wunderlich	Agyneta	depigmentata		Wunderlich, 2008	Linyphiidae	Araneae	Arachnida	E	SIE	P	0	0	0	1	0	1	0
FLO-MA-T-11_PT-TU-S07	NFF Morro Alto e Pico da Sé	Morro Alto encosta E	FLO-MA-T-11	25S	137113	4376856	BALA	2000	September	Turquin	PT-TU-S07	313	Agyneta depigmentata Wunderlich	Agyneta	depigmentata		Wunderlich, 2008	Linyphiidae	Araneae	Arachnida	E	SIE	P	0	0	0	1	0	1	0
FLO-MA-T-11_PT-TU-S03	NFF Morro Alto e Pico da Sé	Morro Alto encosta E	FLO-MA-T-11	25S	137113	4376856	BALA	2000	September	Turquin	PT-TU-S03	313	Agyneta depigmentata Wunderlich	Agyneta	depigmentata		Wunderlich, 2008	Linyphiidae	Araneae	Arachnida	E	SIE	P	0	0	0	2	0	2	0
FLO-MA-T-11_PT-ET-S16	NFF Morro Alto e Pico da Sé	Morro Alto encosta E	FLO-MA-T-11	25S	137113	4376856	BALA	2000	September	Ethylene	PT-ET-S16	313	Agyneta depigmentata Wunderlich	Agyneta	depigmentata		Wunderlich, 2008	Linyphiidae	Araneae	Arachnida	E	SIE	P	0	0	0	1	0	1	0
FLO-MA-T-11_PT-ET-S02	NFF Morro Alto e Pico da Sé	Morro Alto encosta E	FLO-MA-T-11	25S	137113	4376856	BALA	2000	September	Ethylene	PT-ET-S02	313	Agyneta depigmentata Wunderlich	Agyneta	depigmentata		Wunderlich, 2008	Linyphiidae	Araneae	Arachnida	E	SIE	P	0	1	1	1	0	3	2
FLO-MA-T-11_PT-ET-S12	NFF Morro Alto e Pico da Sé	Morro Alto encosta E	FLO-MA-T-11	25S	137113	4376856	BALA	2000	September	Ethylene	PT-ET-S12	313	Agyneta depigmentata Wunderlich	Agyneta	depigmentata		Wunderlich, 2008	Linyphiidae	Araneae	Arachnida	E	SIE	P	0	0	0	1	0	1	0
FLO-MA-T-11_PT-ET-S10	NFF Morro Alto e Pico da Sé	Morro Alto encosta E	FLO-MA-T-11	25S	137113	4376856	BALA	2000	September	Ethylene	PT-ET-S10	313	Agyneta depigmentata Wunderlich	Agyneta	depigmentata		Wunderlich, 2008	Linyphiidae	Araneae	Arachnida	E	SIE	P	0	0	0	1	0	1	0
FLO-MA-T-11_PT-ET-S26	NFF Morro Alto e Pico da Sé	Morro Alto encosta E	FLO-MA-T-11	25S	137113	4376856	BALA	2000	September	Ethylene	PT-ET-S26	313	Agyneta depigmentata Wunderlich	Agyneta	depigmentata		Wunderlich, 2008	Linyphiidae	Araneae	Arachnida	E	SIE	P	0	0	0	3	0	3	0
FLO-MA-T-11_PT-ET-S04	NFF Morro Alto e Pico da Sé	Morro Alto encosta E	FLO-MA-T-11	25S	137113	4376856	BALA	2000	September	Ethylene	PT-ET-S04	313	Agyneta depigmentata Wunderlich	Agyneta	depigmentata		Wunderlich, 2008	Linyphiidae	Araneae	Arachnida	E	SIE	P	0	0	0	6	0	6	0
FLO-MA-T-11_PT-ET-S14	NFF Morro Alto e Pico da Sé	Morro Alto encosta E	FLO-MA-T-11	25S	137113	4376856	BALA	2000	September	Ethylene	PT-ET-S14	313	Agyneta depigmentata Wunderlich	Agyneta	depigmentata		Wunderlich, 2008	Linyphiidae	Araneae	Arachnida	E	SIE	P	0	0	0	4	0	4	0
FLO-MA-T-11_PT-ET-S18	NFF Morro Alto e Pico da Sé	Morro Alto encosta E	FLO-MA-T-11	25S	137113	4376856	BALA	2000	September	Ethylene	PT-ET-S18	313	Agyneta depigmentata Wunderlich	Agyneta	depigmentata		Wunderlich, 2008	Linyphiidae	Araneae	Arachnida	E	SIE	P	0	0	1	0	0	1	1
FLO-MA-T-14_PT-TU-S21	NFF Morro Alto e Pico da Sé	Caldeira Comprida	FLO-MA-T-14	25S	137246	4374777	BALA	2000	September	Turquin	PT-TU-S21	313	Agyneta depigmentata Wunderlich	Agyneta	depigmentata		Wunderlich, 2008	Linyphiidae	Araneae	Arachnida	E	SIE	P	0	0	0	4	0	4	0
FLO-MA-T-14_PT-TU-S23	NFF Morro Alto e Pico da Sé	Caldeira Comprida	FLO-MA-T-14	25S	137246	4374777	BALA	2000	September	Turquin	PT-TU-S23	313	Agyneta depigmentata Wunderlich	Agyneta	depigmentata		Wunderlich, 2008	Linyphiidae	Araneae	Arachnida	E	SIE	P	0	0	0	1	0	1	0
FLO-MA-T-14_PT-TU-S19	NFF Morro Alto e Pico da Sé	Caldeira Comprida	FLO-MA-T-14	25S	137246	4374777	BALA	2000	September	Turquin	PT-TU-S19	313	Agyneta depigmentata Wunderlich	Agyneta	depigmentata		Wunderlich, 2008	Linyphiidae	Araneae	Arachnida	E	SIE	P	0	0	0	2	0	2	0
FLO-MA-T-14_PT-TU-S01	NFF Morro Alto e Pico da Sé	Caldeira Comprida	FLO-MA-T-14	25S	137246	4374777	BALA	2000	September	Turquin	PT-TU-S01	313	Agyneta depigmentata Wunderlich	Agyneta	depigmentata		Wunderlich, 2008	Linyphiidae	Araneae	Arachnida	E	SIE	P	0	0	0	1	0	1	0
FLO-MA-T-14_PT-TU-S21	NFF Morro Alto e Pico da Sé	Caldeira Comprida	FLO-MA-T-14	25S	137246	4374777	BALA	2000	September	Turquin	PT-TU-S21	313	Agyneta depigmentata Wunderlich	Agyneta	depigmentata		Wunderlich, 2008	Linyphiidae	Araneae	Arachnida	E	SIE	P	0	0	0	4	0	4	0
FLO-MA-T-14_PT-TU-S23	NFF Morro Alto e Pico da Sé	Caldeira Comprida	FLO-MA-T-14	25S	137246	4374777	BALA	2000	September	Turquin	PT-TU-S23	313	Agyneta depigmentata Wunderlich	Agyneta	depigmentata		Wunderlich, 2008	Linyphiidae	Araneae	Arachnida	E	SIE	P	0	0	0	2	0	2	0
FLO-MA-T-14_PT-TU-S19	NFF Morro Alto e Pico da Sé	Caldeira Comprida	FLO-MA-T-14	25S	137246	4374777	BALA	2000	September	Turquin	PT-TU-S19	313	Agyneta depigmentata Wunderlich	Agyneta	depigmentata		Wunderlich, 2008	Linyphiidae	Araneae	Arachnida	E	SIE	P	0	0	0	1	0	1	0
FLO-MA-T-14_PT-TU-S07	NFF Morro Alto e Pico da Sé	Caldeira Comprida	FLO-MA-T-14	25S	137246	4374777	BALA	2000	September	Turquin	PT-TU-S07	313	Agyneta depigmentata Wunderlich	Agyneta	depigmentata		Wunderlich, 2008	Linyphiidae	Araneae	Arachnida	E	SIE	P	0	0	0	1	0	1	0
FLO-MA-T-14_PT-TU-S03	NFF Morro Alto e Pico da Sé	Caldeira Comprida	FLO-MA-T-14	25S	137246	4374777	BALA	2000	September	Turquin	PT-TU-S03	313	Agyneta depigmentata Wunderlich	Agyneta	depigmentata		Wunderlich, 2008	Linyphiidae	Araneae	Arachnida	E	SIE	P	0	0	0	3	0	3	0
FLO-MA-T-14_PT-TU-S05	NFF Morro Alto e Pico da Sé	Caldeira Comprida	FLO-MA-T-14	25S	137246	4374777	BALA	2000	September	Turquin	PT-TU-S05	313	Agyneta depigmentata Wunderlich	Agyneta	depigmentata		Wunderlich, 2008	Linyphiidae	Araneae	Arachnida	E	SIE	P	0	0	0	1	0	1	0
FLO-MA-T-14_PT-ET-S18	NFF Morro Alto e Pico da Sé	Caldeira Comprida	FLO-MA-T-14	25S	137246	4374777	BALA	2000	September	Ethylene	PT-ET-S18	313	Agyneta depigmentata Wunderlich	Agyneta	depigmentata		Wunderlich, 2008	Linyphiidae	Araneae	Arachnida	E	SIE	P	0	0	0	2	0	2	0
FLO-MA-T-14_PT-ET-S06	NFF Morro Alto e Pico da Sé	Caldeira Comprida	FLO-MA-T-14	25S	137246	4374777	BALA	2000	September	Ethylene	PT-ET-S06	313	Agyneta depigmentata Wunderlich	Agyneta	depigmentata		Wunderlich, 2008	Linyphiidae	Araneae	Arachnida	E	SIE	P	0	0	0	3	0	3	0
FLO-MA-T-14_PT-ET-S10	NFF Morro Alto e Pico da Sé	Caldeira Comprida	FLO-MA-T-14	25S	137246	4374777	BALA	2000	September	Ethylene	PT-ET-S10	313	Agyneta depigmentata Wunderlich	Agyneta	depigmentata		Wunderlich, 2008	Linyphiidae	Araneae	Arachnida	E	SIE	P	0	0	0	1	0	1	0
FLO-MA-T-14_PT-ET-S24	NFF Morro Alto e Pico da Sé	Caldeira Comprida	FLO-MA-T-14	25S	137246	4374777	BALA	2000	September	Ethylene	PT-ET-S24	313	Agyneta depigmentata Wunderlich	Agyneta	depigmentata		Wunderlich, 2008	Linyphiidae	Araneae	Arachnida	E	SIE	P	0	0	0	4	0	4	0
FLO-MA-T-14_PT-ET-S08	NFF Morro Alto e Pico da Sé	Caldeira Comprida	FLO-MA-T-14	25S	137246	4374777	BALA	2000	September	Ethylene	PT-ET-S08	313	Agyneta depigmentata Wunderlich	Agyneta	depigmentata		Wunderlich, 2008	Linyphiidae	Araneae	Arachnida	E	SIE	P	0	1	1	0	0	2	2
FLO-MA-T-14_PT-ET-S12	NFF Morro Alto e Pico da Sé	Caldeira Comprida	FLO-MA-T-14	25S	137246	4374777	BALA	2000	September	Ethylene	PT-ET-S12	313	Agyneta depigmentata Wunderlich	Agyneta	depigmentata		Wunderlich, 2008	Linyphiidae	Araneae	Arachnida	E	SIE	P	0	1	0	0	0	1	1
FLO-MA-T-14_PT-ET-S14	NFF Morro Alto e Pico da Sé	Caldeira Comprida	FLO-MA-T-14	25S	137246	4374777	BALA	2000	September	Ethylene	PT-ET-S14	313	Agyneta depigmentata Wunderlich	Agyneta	depigmentata		Wunderlich, 2008	Linyphiidae	Araneae	Arachnida	E	SIE	P	0	0	0	1	0	1	0
FLO-MA-T-14_PT-ET-S04	NFF Morro Alto e Pico da Sé	Caldeira Comprida	FLO-MA-T-14	25S	137246	4374777	BALA	2000	September	Ethylene	PT-ET-S04	313	Agyneta depigmentata Wunderlich	Agyneta	depigmentata		Wunderlich, 2008	Linyphiidae	Araneae	Arachnida	E	SIE	P	0	1	0	1	0	2	1
FLO-MA-T-14_PT-ET-S02	NFF Morro Alto e Pico da Sé	Caldeira Comprida	FLO-MA-T-14	25S	137246	4374777	BALA	2000	September	Ethylene	PT-ET-S02	313	Agyneta depigmentata Wunderlich	Agyneta	depigmentata		Wunderlich, 2008	Linyphiidae	Araneae	Arachnida	E	SIE	P	0	0	0	1	0	1	0
FLO-MA-T-14_PT-ET-S22	NFF Morro Alto e Pico da Sé	Caldeira Comprida	FLO-MA-T-14	25S	137246	4374777	BALA	2000	September	Ethylene	PT-ET-S22	313	Agyneta depigmentata Wunderlich	Agyneta	depigmentata		Wunderlich, 2008	Linyphiidae	Araneae	Arachnida	E	SIE	P	0	0	0	1	0	1	0
FLO-MA-T-15_PT-TU-S15	NFF Morro Alto e Pico da Sé	Pico da Sé	FLO-MA-T-15	25S	138230	4377715	BALA	2000	September	Turquin	PT-TU-S15	313	Agyneta depigmentata Wunderlich	Agyneta	depigmentata		Wunderlich, 2008	Linyphiidae	Araneae	Arachnida	E	SIE	P	0	0	0	5	0	5	0
FLO-MA-T-15_PT-TU-S01	NFF Morro Alto e Pico da Sé	Pico da Sé	FLO-MA-T-15	25S	138230	4377715	BALA	2000	September	Turquin	PT-TU-S01	313	Agyneta depigmentata Wunderlich	Agyneta	depigmentata		Wunderlich, 2008	Linyphiidae	Araneae	Arachnida	E	SIE	P	0	0	0	2	0	2	0
FLO-MA-T-15_PT-TU-S03	NFF Morro Alto e Pico da Sé	Pico da Sé	FLO-MA-T-15	25S	138230	4377715	BALA	2000	September	Turquin	PT-TU-S03	313	Agyneta depigmentata Wunderlich	Agyneta	depigmentata		Wunderlich, 2008	Linyphiidae	Araneae	Arachnida	E	SIE	P	0	0	0	1	0	1	0
FLO-MA-T-15_PT-TU-S23	NFF Morro Alto e Pico da Sé	Pico da Sé	FLO-MA-T-15	25S	138230	4377715	BALA	2000	September	Turquin	PT-TU-S23	313	Agyneta depigmentata Wunderlich	Agyneta	depigmentata		Wunderlich, 2008	Linyphiidae	Araneae	Arachnida	E	SIE	P	0	0	0	1	0	1	0
FLO-MA-T-15_PT-TU-S29	NFF Morro Alto e Pico da Sé	Pico da Sé	FLO-MA-T-15	25S	138230	4377715	BALA	2000	September	Turquin	PT-TU-S29	313	Agyneta depigmentata Wunderlich	Agyneta	depigmentata		Wunderlich, 2008	Linyphiidae	Araneae	Arachnida	E	SIE	P	0	1	0	0	0	1	1
FLO-MA-T-15_PT-TU-S07	NFF Morro Alto e Pico da Sé	Pico da Sé	FLO-MA-T-15	25S	138230	4377715	BALA	2000	September	Turquin	PT-TU-S07	313	Agyneta depigmentata Wunderlich	Agyneta	depigmentata		Wunderlich, 2008	Linyphiidae	Araneae	Arachnida	E	SIE	P	0	0	0	1	0	1	0
FLO-MA-T-15_PT-TU-S13	NFF Morro Alto e Pico da Sé	Pico da Sé	FLO-MA-T-15	25S	138230	4377715	BALA	2000	September	Turquin	PT-TU-S13	313	Agyneta depigmentata Wunderlich	Agyneta	depigmentata		Wunderlich, 2008	Linyphiidae	Araneae	Arachnida	E	SIE	P	0	0	0	1	0	1	0
FLO-MA-T-15_PT-TU-S01	NFF Morro Alto e Pico da Sé	Pico da Sé	FLO-MA-T-15	25S	138230	4377715	BALA	2000	September	Turquin	PT-TU-S01	313	Agyneta depigmentata Wunderlich	Agyneta	depigmentata		Wunderlich, 2008	Linyphiidae	Araneae	Arachnida	E	SIE	P	0	0	0	4	0	4	0
FLO-MA-T-15_PT-TU-S03	NFF Morro Alto e Pico da Sé	Pico da Sé	FLO-MA-T-15	25S	138230	4377715	BALA	2000	September	Turquin	PT-TU-S03	313	Agyneta depigmentata Wunderlich	Agyneta	depigmentata		Wunderlich, 2008	Linyphiidae	Araneae	Arachnida	E	SIE	P	0	0	0	1	0	1	0
FLO-MA-T-15_PT-TU-S19	NFF Morro Alto e Pico da Sé	Pico da Sé	FLO-MA-T-15	25S	138230	4377715	BALA	2000	September	Turquin	PT-TU-S19	313	Agyneta depigmentata Wunderlich	Agyneta	depigmentata		Wunderlich, 2008	Linyphiidae	Araneae	Arachnida	E	SIE	P	0	0	1	0	0	1	1
FLO-MA-T-15_PT-ET-S10	NFF Morro Alto e Pico da Sé	Pico da Sé	FLO-MA-T-15	25S	138230	4377715	BALA	2000	September	Ethylene	PT-ET-S10	313	Agyneta depigmentata Wunderlich	Agyneta	depigmentata		Wunderlich, 2008	Linyphiidae	Araneae	Arachnida	E	SIE	P	0	0	0	2	0	2	0
FLO-MA-T-15_PT-ET-S10	NFF Morro Alto e Pico da Sé	Pico da Sé	FLO-MA-T-15	25S	138230	4377715	BALA	2000	September	Ethylene	PT-ET-S10	313	Agyneta depigmentata Wunderlich	Agyneta	depigmentata		Wunderlich, 2008	Linyphiidae	Araneae	Arachnida	E	SIE	P	0	1	0	3	0	4	1
FLO-MA-T-15_PT-ET-S02	NFF Morro Alto e Pico da Sé	Pico da Sé	FLO-MA-T-15	25S	138230	4377715	BALA	2000	September	Ethylene	PT-ET-S02	313	Agyneta depigmentata Wunderlich	Agyneta	depigmentata		Wunderlich, 2008	Linyphiidae	Araneae	Arachnida	E	SIE	P	0	0	0	10	0	10	0
FLO-MA-T-15_PT-ET-S14	NFF Morro Alto e Pico da Sé	Pico da Sé	FLO-MA-T-15	25S	138230	4377715	BALA	2000	September	Ethylene	PT-ET-S14	313	Agyneta depigmentata Wunderlich	Agyneta	depigmentata		Wunderlich, 2008	Linyphiidae	Araneae	Arachnida	E	SIE	P	0	0	0	2	0	2	0
FLO-MA-T-15_PT-ET-S22	NFF Morro Alto e Pico da Sé	Pico da Sé	FLO-MA-T-15	25S	138230	4377715	BALA	2000	September	Ethylene	PT-ET-S22	313	Agyneta depigmentata Wunderlich	Agyneta	depigmentata		Wunderlich, 2008	Linyphiidae	Araneae	Arachnida	E	SIE	P	0	0	0	2	0	2	0
FLO-MA-T-15_PT-ET-S04	NFF Morro Alto e Pico da Sé	Pico da Sé	FLO-MA-T-15	25S	138230	4377715	BALA	2000	September	Ethylene	PT-ET-S04	313	Agyneta depigmentata Wunderlich	Agyneta	depigmentata		Wunderlich, 2008	Linyphiidae	Araneae	Arachnida	E	SIE	P	0	0	0	1	0	1	0
FLO-MA-T-15_PT-ET-S26	NFF Morro Alto e Pico da Sé	Pico da Sé	FLO-MA-T-15	25S	138230	4377715	BALA	2000	September	Ethylene	PT-ET-S26	313	Agyneta depigmentata Wunderlich	Agyneta	depigmentata		Wunderlich, 2008	Linyphiidae	Araneae	Arachnida	E	SIE	P	0	0	1	1	0	2	1
FLO-MA-T-15_PT-ET-S12	NFF Morro Alto e Pico da Sé	Pico da Sé	FLO-MA-T-15	25S	138230	4377715	BALA	2000	September	Ethylene	PT-ET-S12	313	Agyneta depigmentata Wunderlich	Agyneta	depigmentata		Wunderlich, 2008	Linyphiidae	Araneae	Arachnida	E	SIE	P	0	0	0	1	0	1	0
FLO-MA-T-16_PT-TU-S17	NFF Morro Alto e Pico da Sé	Ribeira do Cascalho	FLO-MA-T-16	25S	139699	4378652	BALA	2000	September	Turquin	PT-TU-S17	313	Agyneta depigmentata Wunderlich	Agyneta	depigmentata		Wunderlich, 2008	Linyphiidae	Araneae	Arachnida	E	SIE	P	0	1	0	1	0	2	1
FLO-MA-T-16_PT-TU-S29	NFF Morro Alto e Pico da Sé	Ribeira do Cascalho	FLO-MA-T-16	25S	139699	4378652	BALA	2000	September	Turquin	PT-TU-S29	313	Agyneta depigmentata Wunderlich	Agyneta	depigmentata		Wunderlich, 2008	Linyphiidae	Araneae	Arachnida	E	SIE	P	0	1	1	1	0	3	2
FLO-MA-T-16_PT-TU-S15	NFF Morro Alto e Pico da Sé	Ribeira do Cascalho	FLO-MA-T-16	25S	139699	4378652	BALA	2000	September	Turquin	PT-TU-S15	313	Agyneta depigmentata Wunderlich	Agyneta	depigmentata		Wunderlich, 2008	Linyphiidae	Araneae	Arachnida	E	SIE	P	0	0	0	1	0	1	0
FLO-MA-T-16_PT-TU-S27	NFF Morro Alto e Pico da Sé	Ribeira do Cascalho	FLO-MA-T-16	25S	139699	4378652	BALA	2000	September	Turquin	PT-TU-S27	313	Agyneta depigmentata Wunderlich	Agyneta	depigmentata		Wunderlich, 2008	Linyphiidae	Araneae	Arachnida	E	SIE	P	0	0	0	1	0	1	0
FLO-MA-T-16_PT-TU-S03	NFF Morro Alto e Pico da Sé	Ribeira do Cascalho	FLO-MA-T-16	25S	139699	4378652	BALA	2000	September	Turquin	PT-TU-S03	313	Agyneta depigmentata Wunderlich	Agyneta	depigmentata		Wunderlich, 2008	Linyphiidae	Araneae	Arachnida	E	SIE	P	0	0	0	1	0	1	0
FLO-MA-T-16_PT-TU-S07	NFF Morro Alto e Pico da Sé	Ribeira do Cascalho	FLO-MA-T-16	25S	139699	4378652	BALA	2000	September	Turquin	PT-TU-S07	313	Agyneta depigmentata Wunderlich	Agyneta	depigmentata		Wunderlich, 2008	Linyphiidae	Araneae	Arachnida	E	SIE	P	0	3	0	0	0	3	3
FLO-MA-T-16_PT-TU-S11	NFF Morro Alto e Pico da Sé	Ribeira do Cascalho	FLO-MA-T-16	25S	139699	4378652	BALA	2000	September	Turquin	PT-TU-S11	313	Agyneta depigmentata Wunderlich	Agyneta	depigmentata		Wunderlich, 2008	Linyphiidae	Araneae	Arachnida	E	SIE	P	0	0	1	2	0	3	1
FLO-MA-T-16_PT-TU-S09	NFF Morro Alto e Pico da Sé	Ribeira do Cascalho	FLO-MA-T-16	25S	139699	4378652	BALA	2000	September	Turquin	PT-TU-S09	313	Agyneta depigmentata Wunderlich	Agyneta	depigmentata		Wunderlich, 2008	Linyphiidae	Araneae	Arachnida	E	SIE	P	0	0	1	0	0	1	1
FLO-MA-T-16_PT-TU-S21	NFF Morro Alto e Pico da Sé	Ribeira do Cascalho	FLO-MA-T-16	25S	139699	4378652	BALA	2000	September	Turquin	PT-TU-S21	313	Agyneta depigmentata Wunderlich	Agyneta	depigmentata		Wunderlich, 2008	Linyphiidae	Araneae	Arachnida	E	SIE	P	0	1	0	0	0	1	1
FLO-MA-T-16_PT-ET-S06	NFF Morro Alto e Pico da Sé	Ribeira do Cascalho	FLO-MA-T-16	25S	139699	4378652	BALA	2000	September	Ethylene	PT-ET-S06	313	Agyneta depigmentata Wunderlich	Agyneta	depigmentata		Wunderlich, 2008	Linyphiidae	Araneae	Arachnida	E	SIE	P	0	1	1	3	0	5	2
FLO-MA-T-16_PT-ET-S30	NFF Morro Alto e Pico da Sé	Ribeira do Cascalho	FLO-MA-T-16	25S	139699	4378652	BALA	2000	September	Ethylene	PT-ET-S30	313	Agyneta depigmentata Wunderlich	Agyneta	depigmentata		Wunderlich, 2008	Linyphiidae	Araneae	Arachnida	E	SIE	P	0	0	0	3	0	3	0
FLO-MA-T-16_PT-ET-S12	NFF Morro Alto e Pico da Sé	Ribeira do Cascalho	FLO-MA-T-16	25S	139699	4378652	BALA	2000	September	Ethylene	PT-ET-S12	313	Agyneta depigmentata Wunderlich	Agyneta	depigmentata		Wunderlich, 2008	Linyphiidae	Araneae	Arachnida	E	SIE	P	0	0	0	1	0	1	0
FLO-MA-T-16_PT-ET-S08	NFF Morro Alto e Pico da Sé	Ribeira do Cascalho	FLO-MA-T-16	25S	139699	4378652	BALA2	2010	July	Ethylene	PT-ET-S08	313	Agyneta depigmentata Wunderlich	Agyneta	depigmentata		Wunderlich, 2008	Linyphiidae	Araneae	Arachnida	E	SIE	P	0	1	0	0	0	1	1
FLO-MA-T-16_PT-ET-S28	NFF Morro Alto e Pico da Sé	Ribeira do Cascalho	FLO-MA-T-16	25S	139699	4378652	BALA2	2010	July	Ethylene	PT-ET-S28	313	Agyneta depigmentata Wunderlich	Agyneta	depigmentata		Wunderlich, 2008	Linyphiidae	Araneae	Arachnida	E	SIE	P	0	1	0	0	0	1	1
FLO-MA-T-16_PT-ET-S24	NFF Morro Alto e Pico da Sé	Ribeira do Cascalho	FLO-MA-T-16	25S	139699	4378652	BALA2	2010	July	Ethylene	PT-ET-S24	313	Agyneta depigmentata Wunderlich	Agyneta	depigmentata		Wunderlich, 2008	Linyphiidae	Araneae	Arachnida	E	SIE	P	0	0	0	1	0	1	0
FLO-MA-T-16_PT-ET-S30	NFF Morro Alto e Pico da Sé	Ribeira do Cascalho	FLO-MA-T-16	25S	139699	4378652	BALA2	2010	July	Ethylene	PT-ET-S30	313	Agyneta depigmentata Wunderlich	Agyneta	depigmentata		Wunderlich, 2008	Linyphiidae	Araneae	Arachnida	E	SIE	P	0	1	0	0	0	1	1
FLO-MA-T-16_PT-ET-S04	NFF Morro Alto e Pico da Sé	Ribeira do Cascalho	FLO-MA-T-16	25S	139699	4378652	BALA2	2010	July	Ethylene	PT-ET-S04	313	Agyneta depigmentata Wunderlich	Agyneta	depigmentata		Wunderlich, 2008	Linyphiidae	Araneae	Arachnida	E	SIE	P	0	0	1	1	0	2	1
FLO-MA-T-16_PT-TU-S19	NFF Morro Alto e Pico da Sé	Ribeira do Cascalho	FLO-MA-T-16	25S	139699	4378652	BALA2	2010	July	Turquin	PT-TU-S19	313	Agyneta depigmentata Wunderlich	Agyneta	depigmentata		Wunderlich, 2008	Linyphiidae	Araneae	Arachnida	E	SIE	P	0	0	1	1	0	2	1
FLO-MA-T-16_PT-TU-S09	NFF Morro Alto e Pico da Sé	Ribeira do Cascalho	FLO-MA-T-16	25S	139699	4378652	BALA2	2010	July	Turquin	PT-TU-S09	313	Agyneta depigmentata Wunderlich	Agyneta	depigmentata		Wunderlich, 2008	Linyphiidae	Araneae	Arachnida	E	SIE	P	0	0	0	1	0	1	0
FLO-MA-T-16_PT-TU-S13	NFF Morro Alto e Pico da Sé	Ribeira do Cascalho	FLO-MA-T-16	25S	139699	4378652	BALA2	2010	July	Turquin	PT-TU-S13	313	Agyneta depigmentata Wunderlich	Agyneta	depigmentata		Wunderlich, 2008	Linyphiidae	Araneae	Arachnida	E	SIE	P	0	1	0	0	0	1	1
FAI-CG-T-02_PT-TU-S03	NFF Cabeço do Fogo	Caldeira	FAI-CG-T-02	26S	346188	4272501	BALA	1999	September	Turquin	PT-TU-S03	293	Agyneta rugosa Wunderlich	Agyneta	rugosa		Wunderlich, 1992	Linyphiidae	Araneae	Arachnida	E	A_END	P	0	1	0	0	0	1	1
FLO-FR-T-06_PT-ET-S14	NFF Caldeiras Funda e Rasa	Juniperal	FLO-FR-T-06	25S	136738	4370215	BALA	1999	July	Ethylene	PT-ET-S14	244	Alestrus dolosus (Crotch)	Alestrus	dolosus		(Crotch, 1867)	Elateridae	Coleoptera	Insecta	E	A_END	H	1	0	0	0	0	1	1
FLO-FR-T-06_PT-ET-S06	NFF Caldeiras Funda e Rasa	Juniperal	FLO-FR-T-06	25S	136738	4370215	BALA2	2010	July	Ethylene	PT-ET-S06	244	Alestrus dolosus (Crotch)	Alestrus	dolosus		(Crotch, 1867)	Elateridae	Coleoptera	Insecta	E	A_END	H	1	0	0	0	0	1	1
FLO-FR-T-06_PT-ET-S14	NFF Caldeiras Funda e Rasa	Juniperal	FLO-FR-T-06	25S	136738	4370215	BALA2	2010	July	Ethylene	PT-ET-S14	244	Alestrus dolosus (Crotch)	Alestrus	dolosus		(Crotch, 1867)	Elateridae	Coleoptera	Insecta	E	A_END	H	1	0	0	0	0	1	1
FLO-FR-T-06_PT-ET-S18	NFF Caldeiras Funda e Rasa	Juniperal	FLO-FR-T-06	25S	136738	4370215	BALA2	2010	July	Ethylene	PT-ET-S18	244	Alestrus dolosus (Crotch)	Alestrus	dolosus		(Crotch, 1867)	Elateridae	Coleoptera	Insecta	E	A_END	H	1	0	0	0	0	1	1
FLO-FR-T-06_PT-ET-S16	NFF Caldeiras Funda e Rasa	Juniperal	FLO-FR-T-06	25S	136738	4370215	BALA2	2010	July	Ethylene	PT-ET-S16	244	Alestrus dolosus (Crotch)	Alestrus	dolosus		(Crotch, 1867)	Elateridae	Coleoptera	Insecta	E	A_END	H	1	0	0	0	0	1	1
FLO-FR-T-06_PT-ET-S10	NFF Caldeiras Funda e Rasa	Juniperal	FLO-FR-T-06	25S	136738	4370215	BALA2	2010	July	Ethylene	PT-ET-S10	244	Alestrus dolosus (Crotch)	Alestrus	dolosus		(Crotch, 1867)	Elateridae	Coleoptera	Insecta	E	A_END	H	1	0	0	0	0	1	1
FLO-FR-T-06_PT-TU-S15	NFF Caldeiras Funda e Rasa	Juniperal	FLO-FR-T-06	25S	136738	4370215	BALA2	2010	July	Turquin	PT-TU-S15	244	Alestrus dolosus (Crotch)	Alestrus	dolosus		(Crotch, 1867)	Elateridae	Coleoptera	Insecta	E	A_END	H	1	0	0	0	0	1	1
FLO-FR-T-06_PT-TU-S17	NFF Caldeiras Funda e Rasa	Juniperal	FLO-FR-T-06	25S	136738	4370215	BALA2	2010	July	Turquin	PT-TU-S17	244	Alestrus dolosus (Crotch)	Alestrus	dolosus		(Crotch, 1867)	Elateridae	Coleoptera	Insecta	E	A_END	H	1	0	0	0	0	1	1
FLO-FR-T-07_PT-TU-S23	NFF Caldeiras Funda e Rasa	Encosta Caldeira Funda	FLO-FR-T-07	25S	136817	4370019	BALA	1999	July	Turquin	PT-TU-S23	244	Alestrus dolosus (Crotch)	Alestrus	dolosus		(Crotch, 1867)	Elateridae	Coleoptera	Insecta	E	A_END	H	1	0	0	0	0	1	1
FLO-FR-T-07_PT-TU-S13	NFF Caldeiras Funda e Rasa	Encosta Caldeira Funda	FLO-FR-T-07	25S	136817	4370019	BALA	1999	July	Turquin	PT-TU-S13	244	Alestrus dolosus (Crotch)	Alestrus	dolosus		(Crotch, 1867)	Elateridae	Coleoptera	Insecta	E	A_END	H	1	0	0	0	0	1	1
FLO-FR-T-07_PT-TU-S19	NFF Caldeiras Funda e Rasa	Encosta Caldeira Funda	FLO-FR-T-07	25S	136817	4370019	BALA	1999	July	Turquin	PT-TU-S19	244	Alestrus dolosus (Crotch)	Alestrus	dolosus		(Crotch, 1867)	Elateridae	Coleoptera	Insecta	E	A_END	H	1	0	0	0	0	1	1
FLO-FR-T-07_PT-TU-S07	NFF Caldeiras Funda e Rasa	Encosta Caldeira Funda	FLO-FR-T-07	25S	136817	4370019	BALA	1999	July	Turquin	PT-TU-S07	244	Alestrus dolosus (Crotch)	Alestrus	dolosus		(Crotch, 1867)	Elateridae	Coleoptera	Insecta	E	A_END	H	1	0	0	0	0	1	1
FLO-FR-T-07_PT-TU-S01	NFF Caldeiras Funda e Rasa	Encosta Caldeira Funda	FLO-FR-T-07	25S	136817	4370019	BALA2	2010	July	Turquin	PT-TU-S01	244	Alestrus dolosus (Crotch)	Alestrus	dolosus		(Crotch, 1867)	Elateridae	Coleoptera	Insecta	E	A_END	H	1	0	0	0	0	1	1
FLO-FR-T-07_PT-TU-S21	NFF Caldeiras Funda e Rasa	Encosta Caldeira Funda	FLO-FR-T-07	25S	136817	4370019	BALA2	2010	July	Turquin	PT-TU-S21	244	Alestrus dolosus (Crotch)	Alestrus	dolosus		(Crotch, 1867)	Elateridae	Coleoptera	Insecta	E	A_END	H	1	0	0	0	0	1	1
FLO-FR-T-12_PT-TU-S23	NFF Caldeiras Funda e Rasa	Encosta Erical	FLO-FR-T-12	25S	137301	4371286	BALA	2000	September	Turquin	PT-TU-S23	244	Alestrus dolosus (Crotch)	Alestrus	dolosus		(Crotch, 1867)	Elateridae	Coleoptera	Insecta	E	A_END	H	1	0	0	0	0	1	1
FLO-FR-T-12_PT-TU-S21	NFF Caldeiras Funda e Rasa	Encosta Erical	FLO-FR-T-12	25S	137301	4371286	BALA	2000	September	Turquin	PT-TU-S21	244	Alestrus dolosus (Crotch)	Alestrus	dolosus		(Crotch, 1867)	Elateridae	Coleoptera	Insecta	E	A_END	H	1	0	0	0	0	1	1
FLO-FR-T-12_PT-TU-S03	NFF Caldeiras Funda e Rasa	Encosta Erical	FLO-FR-T-12	25S	137301	4371286	BALA	2000	September	Turquin	PT-TU-S03	244	Alestrus dolosus (Crotch)	Alestrus	dolosus		(Crotch, 1867)	Elateridae	Coleoptera	Insecta	E	A_END	H	1	0	0	0	0	1	1
FLO-FR-T-12_PT-TU-S17	NFF Caldeiras Funda e Rasa	Encosta Erical	FLO-FR-T-12	25S	137301	4371286	BALA	2000	September	Turquin	PT-TU-S17	244	Alestrus dolosus (Crotch)	Alestrus	dolosus		(Crotch, 1867)	Elateridae	Coleoptera	Insecta	E	A_END	H	1	0	0	0	0	1	1
FLO-FR-T-12_PT-TU-S13	NFF Caldeiras Funda e Rasa	Encosta Erical	FLO-FR-T-12	25S	137301	4371286	BALA	2000	September	Turquin	PT-TU-S13	244	Alestrus dolosus (Crotch)	Alestrus	dolosus		(Crotch, 1867)	Elateridae	Coleoptera	Insecta	E	A_END	H	1	0	0	0	0	1	1
FLO-FR-T-12_PT-TU-S01	NFF Caldeiras Funda e Rasa	Encosta Erical	FLO-FR-T-12	25S	137301	4371286	BALA	2000	September	Turquin	PT-TU-S01	244	Alestrus dolosus (Crotch)	Alestrus	dolosus		(Crotch, 1867)	Elateridae	Coleoptera	Insecta	E	A_END	H	1	0	0	0	0	1	1
FLO-FR-T-12_PT-TU-S05	NFF Caldeiras Funda e Rasa	Encosta Erical	FLO-FR-T-12	25S	137301	4371286	BALA	2000	September	Turquin	PT-TU-S05	244	Alestrus dolosus (Crotch)	Alestrus	dolosus		(Crotch, 1867)	Elateridae	Coleoptera	Insecta	E	A_END	H	1	0	0	0	0	1	1
FLO-FR-T-12_PT-TU-S09	NFF Caldeiras Funda e Rasa	Encosta Erical	FLO-FR-T-12	25S	137301	4371286	BALA	2000	September	Turquin	PT-TU-S09	244	Alestrus dolosus (Crotch)	Alestrus	dolosus		(Crotch, 1867)	Elateridae	Coleoptera	Insecta	E	A_END	H	4	0	0	0	0	4	4
FLO-FR-T-12_PT-TU-S11	NFF Caldeiras Funda e Rasa	Encosta Erical	FLO-FR-T-12	25S	137301	4371286	BALA	2000	September	Turquin	PT-TU-S11	244	Alestrus dolosus (Crotch)	Alestrus	dolosus		(Crotch, 1867)	Elateridae	Coleoptera	Insecta	E	A_END	H	2	0	0	0	0	2	2
FLO-FR-T-12_PT-ET-S10	NFF Caldeiras Funda e Rasa	Encosta Erical	FLO-FR-T-12	25S	137301	4371286	BALA	2000	September	Ethylene	PT-ET-S10	244	Alestrus dolosus (Crotch)	Alestrus	dolosus		(Crotch, 1867)	Elateridae	Coleoptera	Insecta	E	A_END	H	1	0	0	0	0	1	1
FLO-FR-T-12_PT-ET-S16	NFF Caldeiras Funda e Rasa	Encosta Erical	FLO-FR-T-12	25S	137301	4371286	BALA	2000	September	Ethylene	PT-ET-S16	244	Alestrus dolosus (Crotch)	Alestrus	dolosus		(Crotch, 1867)	Elateridae	Coleoptera	Insecta	E	A_END	H	1	0	0	0	0	1	1
FLO-FR-T-12_PT-ET-S12	NFF Caldeiras Funda e Rasa	Encosta Erical	FLO-FR-T-12	25S	137301	4371286	BALA	2000	September	Ethylene	PT-ET-S12	244	Alestrus dolosus (Crotch)	Alestrus	dolosus		(Crotch, 1867)	Elateridae	Coleoptera	Insecta	E	A_END	H	3	0	0	0	0	3	3
FLO-FR-T-12_PT-ET-S06	NFF Caldeiras Funda e Rasa	Encosta Erical	FLO-FR-T-12	25S	137301	4371286	BALA	2000	September	Ethylene	PT-ET-S06	244	Alestrus dolosus (Crotch)	Alestrus	dolosus		(Crotch, 1867)	Elateridae	Coleoptera	Insecta	E	A_END	H	1	0	0	0	0	1	1
FLO-FR-T-12_PT-ET-S08	NFF Caldeiras Funda e Rasa	Encosta Erical	FLO-FR-T-12	25S	137301	4371286	BALA	2000	September	Ethylene	PT-ET-S08	244	Alestrus dolosus (Crotch)	Alestrus	dolosus		(Crotch, 1867)	Elateridae	Coleoptera	Insecta	E	A_END	H	3	0	0	0	0	3	3
FLO-FR-T-12_PT-ET-S14	NFF Caldeiras Funda e Rasa	Encosta Erical	FLO-FR-T-12	25S	137301	4371286	BALA	2000	September	Ethylene	PT-ET-S14	244	Alestrus dolosus (Crotch)	Alestrus	dolosus		(Crotch, 1867)	Elateridae	Coleoptera	Insecta	E	A_END	H	2	0	0	0	0	2	2
FLO-MA-T-04_PT-ET-S04	NFF Morro Alto e Pico da Sé	Ribeira da Fazenda	FLO-MA-T-04	25S	138309	4377246	BALA	1999	July	Ethylene	PT-ET-S04	244	Alestrus dolosus (Crotch)	Alestrus	dolosus		(Crotch, 1867)	Elateridae	Coleoptera	Insecta	E	A_END	H	1	0	0	0	0	1	1
FLO-MA-T-15_PT-TU-S19	NFF Morro Alto e Pico da Sé	Pico da Sé	FLO-MA-T-15	25S	138230	4377715	BALA	2000	September	Turquin	PT-TU-S19	244	Alestrus dolosus (Crotch)	Alestrus	dolosus		(Crotch, 1867)	Elateridae	Coleoptera	Insecta	E	A_END	H	1	0	0	0	0	1	1
FLO-MA-T-15_PT-TU-S23	NFF Morro Alto e Pico da Sé	Pico da Sé	FLO-MA-T-15	25S	138230	4377715	BALA	2000	September	Turquin	PT-TU-S23	244	Alestrus dolosus (Crotch)	Alestrus	dolosus		(Crotch, 1867)	Elateridae	Coleoptera	Insecta	E	A_END	H	1	0	0	0	0	1	1
FLO-MA-T-15_PT-TU-S25	NFF Morro Alto e Pico da Sé	Pico da Sé	FLO-MA-T-15	25S	138230	4377715	BALA	2000	September	Turquin	PT-TU-S25	244	Alestrus dolosus (Crotch)	Alestrus	dolosus		(Crotch, 1867)	Elateridae	Coleoptera	Insecta	E	A_END	H	1	0	0	0	0	1	1
FLO-MA-T-16_PT-TU-S05	NFF Morro Alto e Pico da Sé	Ribeira do Cascalho	FLO-MA-T-16	25S	139699	4378652	BALA2	2010	July	Turquin	PT-TU-S05	244	Alestrus dolosus (Crotch)	Alestrus	dolosus		(Crotch, 1867)	Elateridae	Coleoptera	Insecta	E	A_END	H	1	0	0	0	0	1	1
PIC-CA-T-09_PT-ET-S22	NFF Caveiro	Caveiro base	PIC-CA-T-09	26S	394341	4255080	BALA2	2010	july	Ethylene	PT-ET-S22	244	Alestrus dolosus (Crotch)	Alestrus	dolosus		(Crotch, 1867)	Elateridae	Coleoptera	Insecta	E	A_END	H	1	0	0	0	0	1	1
PIC-CA-T-09_PT-TU-S21	NFF Caveiro	Caveiro base	PIC-CA-T-09	26S	394341	4255080	BALA2	2010	july	Turquin	PT-TU-S21	244	Alestrus dolosus (Crotch)	Alestrus	dolosus		(Crotch, 1867)	Elateridae	Coleoptera	Insecta	E	A_END	H	1	0	0	0	0	1	1
PIC-CA-T-09_PT-TU-S27	NFF Caveiro	Caveiro base	PIC-CA-T-09	26S	394341	4255080	BALA2	2010	july	Turquin	PT-TU-S27	244	Alestrus dolosus (Crotch)	Alestrus	dolosus		(Crotch, 1867)	Elateridae	Coleoptera	Insecta	E	A_END	H	1	0	0	0	0	1	1
PIC-CA-T-22_PT-TU-S23	NFF Caveiro	Caveiro meio da reserva	PIC-CA-T-22	26S	396643	4255074	BALA	2000	July	Turquin	PT-TU-S23	244	Alestrus dolosus (Crotch)	Alestrus	dolosus		(Crotch, 1867)	Elateridae	Coleoptera	Insecta	E	A_END	H	1	0	0	0	0	1	1
SMG-AT-T-02_PT-TU-S23	NFF Atalhada	Fetos arbóreos	SMG-AT-T-02	26S	656878	4188871	BALA	1999	August	Turquin	PT-TU-S23	244	Alestrus dolosus (Crotch)	Alestrus	dolosus		(Crotch, 1867)	Elateridae	Coleoptera	Insecta	E	A_END	H	1	0	0	0	0	1	1
SMG-AT-T-06_PT-TU-S05	NFF Atalhada	Atalhada encosta	SMG-AT-T-06	26S	656905	4188787	BALA	1999	July	Turquin	PT-TU-S05	244	Alestrus dolosus (Crotch)	Alestrus	dolosus		(Crotch, 1867)	Elateridae	Coleoptera	Insecta	E	A_END	H	1	0	0	0	0	1	1
SMG-AT-T-06_PT-TU-S23	NFF Atalhada	Atalhada encosta	SMG-AT-T-06	26S	656905	4188787	BALA	1999	July	Turquin	PT-TU-S23	244	Alestrus dolosus (Crotch)	Alestrus	dolosus		(Crotch, 1867)	Elateridae	Coleoptera	Insecta	E	A_END	H	5	0	0	0	0	5	5
SMG-AT-T-06_PT-TU-S09	NFF Atalhada	Atalhada encosta	SMG-AT-T-06	26S	656905	4188787	BALA	1999	July	Turquin	PT-TU-S09	244	Alestrus dolosus (Crotch)	Alestrus	dolosus		(Crotch, 1867)	Elateridae	Coleoptera	Insecta	E	A_END	H	2	0	0	0	0	2	2
SMG-AT-T-06_PT-TU-S25	NFF Atalhada	Atalhada encosta	SMG-AT-T-06	26S	656905	4188787	BALA	1999	July	Turquin	PT-TU-S25	244	Alestrus dolosus (Crotch)	Alestrus	dolosus		(Crotch, 1867)	Elateridae	Coleoptera	Insecta	E	A_END	H	1	0	0	0	0	1	1
SMG-AT-T-06_PT-TU-S29	NFF Atalhada	Atalhada encosta	SMG-AT-T-06	26S	656905	4188787	BALA	1999	July	Turquin	PT-TU-S29	244	Alestrus dolosus (Crotch)	Alestrus	dolosus		(Crotch, 1867)	Elateridae	Coleoptera	Insecta	E	A_END	H	3	0	0	0	0	3	3
SMG-AT-T-06_PT-TU-S03	NFF Atalhada	Atalhada encosta	SMG-AT-T-06	26S	656905	4188787	BALA	1999	July	Turquin	PT-TU-S03	244	Alestrus dolosus (Crotch)	Alestrus	dolosus		(Crotch, 1867)	Elateridae	Coleoptera	Insecta	E	A_END	H	1	0	0	0	0	1	1
SMG-AT-T-06_PT-TU-S21	NFF Atalhada	Atalhada encosta	SMG-AT-T-06	26S	656905	4188787	BALA	1999	July	Turquin	PT-TU-S21	244	Alestrus dolosus (Crotch)	Alestrus	dolosus		(Crotch, 1867)	Elateridae	Coleoptera	Insecta	E	A_END	H	5	0	0	0	0	5	5
SMG-AT-T-06_PT-TU-S27	NFF Atalhada	Atalhada encosta	SMG-AT-T-06	26S	656905	4188787	BALA	1999	July	Turquin	PT-TU-S27	244	Alestrus dolosus (Crotch)	Alestrus	dolosus		(Crotch, 1867)	Elateridae	Coleoptera	Insecta	E	A_END	H	1	0	0	0	0	1	1
SMG-AT-T-12_PT-ET-S02	NFF Atalhada	Conteiras	SMG-AT-T-12	26S	657009	4188841	PhD Clara	2004	June	Ethylene	PT-ET-S02	244	Alestrus dolosus (Crotch)	Alestrus	dolosus		(Crotch, 1867)	Elateridae	Coleoptera	Insecta	E	A_END	H	1	0	0	0	0	1	1
SMG-AT-T-12_PT-TU-S05	NFF Atalhada	Conteiras	SMG-AT-T-12	26S	657009	4188841	PhD Clara	2004	June	Turquin	PT-TU-S05	244	Alestrus dolosus (Crotch)	Alestrus	dolosus		(Crotch, 1867)	Elateridae	Coleoptera	Insecta	E	A_END	H	1	0	0	0	0	1	1
SMG-AT-T-12_PT-TU-S13	NFF Atalhada	Conteiras	SMG-AT-T-12	26S	657009	4188841	PhD Clara	2004	June	Turquin	PT-TU-S13	244	Alestrus dolosus (Crotch)	Alestrus	dolosus		(Crotch, 1867)	Elateridae	Coleoptera	Insecta	E	A_END	H	1	0	0	0	0	1	1
SMG-AT-T-13_PT-TU-S23	NFF Atalhada	Borda precipício	SMG-AT-T-13	26S	657016	4188637	PhD Clara	2004	June	Turquin	PT-TU-S23	244	Alestrus dolosus (Crotch)	Alestrus	dolosus		(Crotch, 1867)	Elateridae	Coleoptera	Insecta	E	A_END	H	1	0	0	0	0	1	1
SMG-AT-T-13_PT-ET-S30	NFF Atalhada	Borda precipício	SMG-AT-T-13	26S	657016	4188637	PhD Clara	2004	June	Ethylene	PT-ET-S30	244	Alestrus dolosus (Crotch)	Alestrus	dolosus		(Crotch, 1867)	Elateridae	Coleoptera	Insecta	E	A_END	H	1	0	0	0	0	1	1
SMG-AT-T-13_PT-TU-S25	NFF Atalhada	Borda precipício	SMG-AT-T-13	26S	657016	4188637	PhD Clara	2004	June	Turquin	PT-TU-S25	244	Alestrus dolosus (Crotch)	Alestrus	dolosus		(Crotch, 1867)	Elateridae	Coleoptera	Insecta	E	A_END	H	1	0	0	0	0	1	1
SMG-AT-T-13_PT-TU-S03	NFF Atalhada	Borda precipício	SMG-AT-T-13	26S	657016	4188637	PhD Clara	2004	June	Turquin	PT-TU-S03	244	Alestrus dolosus (Crotch)	Alestrus	dolosus		(Crotch, 1867)	Elateridae	Coleoptera	Insecta	E	A_END	H	1	0	0	0	0	1	1
SMG-AT-T-13_PT-TU-S17	NFF Atalhada	Borda precipício	SMG-AT-T-13	26S	657016	4188637	PhD Clara	2004	June	Turquin	PT-TU-S17	244	Alestrus dolosus (Crotch)	Alestrus	dolosus		(Crotch, 1867)	Elateridae	Coleoptera	Insecta	E	A_END	H	1	0	0	0	0	1	1
SMG-GR-T-03_PT-TU-S11	NFF Graminhais	Graminhais encosta	SMG-GR-T-03	26S	654557	4185354	BALA	1999	August	Turquin	PT-TU-S11	244	Alestrus dolosus (Crotch)	Alestrus	dolosus		(Crotch, 1867)	Elateridae	Coleoptera	Insecta	E	A_END	H	1	0	0	0	0	1	1
SMG-GR-T-03_PT-TU-S03	NFF Graminhais	Graminhais encosta	SMG-GR-T-03	26S	654557	4185354	BALA	1999	August	Turquin	PT-TU-S03	244	Alestrus dolosus (Crotch)	Alestrus	dolosus		(Crotch, 1867)	Elateridae	Coleoptera	Insecta	E	A_END	H	2	0	0	0	0	2	2
SMG-GR-T-03_PT-TU-S23	NFF Graminhais	Graminhais encosta	SMG-GR-T-03	26S	654557	4185354	BALA	1999	August	Turquin	PT-TU-S23	244	Alestrus dolosus (Crotch)	Alestrus	dolosus		(Crotch, 1867)	Elateridae	Coleoptera	Insecta	E	A_END	H	1	0	0	0	0	1	1
SMG-GR-T-03_PT-ET-S18	NFF Graminhais	Graminhais encosta	SMG-GR-T-03	26S	654557	4185354	BALA2	2010	june	Ethylene	PT-ET-S18	244	Alestrus dolosus (Crotch)	Alestrus	dolosus		(Crotch, 1867)	Elateridae	Coleoptera	Insecta	E	A_END	H	1	0	0	0	0	1	1
SMG-GR-T-03_PT-ET-S26	NFF Graminhais	Graminhais encosta	SMG-GR-T-03	26S	654557	4185354	BALA2	2010	june	Ethylene	PT-ET-S26	244	Alestrus dolosus (Crotch)	Alestrus	dolosus		(Crotch, 1867)	Elateridae	Coleoptera	Insecta	E	A_END	H	1	0	0	0	0	1	1
SMG-GR-T-03_PT-ET-S08	NFF Graminhais	Graminhais encosta	SMG-GR-T-03	26S	654557	4185354	BALA2	2010	june	Ethylene	PT-ET-S08	244	Alestrus dolosus (Crotch)	Alestrus	dolosus		(Crotch, 1867)	Elateridae	Coleoptera	Insecta	E	A_END	H	1	0	0	0	0	1	1
SMG-GR-T-03_PT-ET-S14	NFF Graminhais	Graminhais encosta	SMG-GR-T-03	26S	654557	4185354	BALA2	2010	june	Ethylene	PT-ET-S14	244	Alestrus dolosus (Crotch)	Alestrus	dolosus		(Crotch, 1867)	Elateridae	Coleoptera	Insecta	E	A_END	H	1	0	0	0	0	1	1
SMG-GR-T-03_PT-TU-S11	NFF Graminhais	Graminhais encosta	SMG-GR-T-03	26S	654557	4185354	BALA2	2010	june	Turquin	PT-TU-S11	244	Alestrus dolosus (Crotch)	Alestrus	dolosus		(Crotch, 1867)	Elateridae	Coleoptera	Insecta	E	A_END	H	1	0	0	0	0	1	1
SMG-GR-T-03_PT-TU-S07	NFF Graminhais	Graminhais encosta	SMG-GR-T-03	26S	654557	4185354	BALA2	2010	june	Turquin	PT-TU-S07	244	Alestrus dolosus (Crotch)	Alestrus	dolosus		(Crotch, 1867)	Elateridae	Coleoptera	Insecta	E	A_END	H	2	0	0	0	0	2	2
SMG-GR-T-03_PT-TU-S17	NFF Graminhais	Graminhais encosta	SMG-GR-T-03	26S	654557	4185354	BALA2	2010	june	Turquin	PT-TU-S17	244	Alestrus dolosus (Crotch)	Alestrus	dolosus		(Crotch, 1867)	Elateridae	Coleoptera	Insecta	E	A_END	H	2	0	0	0	0	2	2
SMG-GR-T-03_PT-TU-S29	NFF Graminhais	Graminhais encosta	SMG-GR-T-03	26S	654557	4185354	BALA2	2010	june	Turquin	PT-TU-S29	244	Alestrus dolosus (Crotch)	Alestrus	dolosus		(Crotch, 1867)	Elateridae	Coleoptera	Insecta	E	A_END	H	1	0	0	0	0	1	1
SMG-GR-T-03_PT-TU-S19	NFF Graminhais	Graminhais encosta	SMG-GR-T-03	26S	654557	4185354	BALA2	2010	june	Turquin	PT-TU-S19	244	Alestrus dolosus (Crotch)	Alestrus	dolosus		(Crotch, 1867)	Elateridae	Coleoptera	Insecta	E	A_END	H	2	0	0	0	0	2	2
SMG-GR-T-03_PT-TU-S01	NFF Graminhais	Graminhais encosta	SMG-GR-T-03	26S	654557	4185354	BALA2	2010	june	Turquin	PT-TU-S01	244	Alestrus dolosus (Crotch)	Alestrus	dolosus		(Crotch, 1867)	Elateridae	Coleoptera	Insecta	E	A_END	H	9	0	0	0	0	9	9
SMG-GR-T-07_PT-TU-S21	NFF Graminhais	Ribeira	SMG-GR-T-07	26S	654838	4185138	BALA	1999	July	Turquin	PT-TU-S21	244	Alestrus dolosus (Crotch)	Alestrus	dolosus		(Crotch, 1867)	Elateridae	Coleoptera	Insecta	E	A_END	H	1	0	0	0	0	1	1
SMG-GR-T-07_PT-TU-S19	NFF Graminhais	Ribeira	SMG-GR-T-07	26S	654838	4185138	BALA	1999	July	Turquin	PT-TU-S19	244	Alestrus dolosus (Crotch)	Alestrus	dolosus		(Crotch, 1867)	Elateridae	Coleoptera	Insecta	E	A_END	H	10	0	0	0	0	10	10
SMG-GR-T-07_PT-TU-S15	NFF Graminhais	Ribeira	SMG-GR-T-07	26S	654838	4185138	BALA	1999	July	Turquin	PT-TU-S15	244	Alestrus dolosus (Crotch)	Alestrus	dolosus		(Crotch, 1867)	Elateridae	Coleoptera	Insecta	E	A_END	H	3	0	0	0	0	3	3
SMG-GR-T-07_PT-TU-S29	NFF Graminhais	Ribeira	SMG-GR-T-07	26S	654838	4185138	BALA	1999	July	Turquin	PT-TU-S29	244	Alestrus dolosus (Crotch)	Alestrus	dolosus		(Crotch, 1867)	Elateridae	Coleoptera	Insecta	E	A_END	H	6	0	0	0	0	6	6
SMG-GR-T-07_PT-TU-S03	NFF Graminhais	Ribeira	SMG-GR-T-07	26S	654838	4185138	BALA	1999	July	Turquin	PT-TU-S03	244	Alestrus dolosus (Crotch)	Alestrus	dolosus		(Crotch, 1867)	Elateridae	Coleoptera	Insecta	E	A_END	H	6	0	0	0	0	6	6
SMG-GR-T-07_PT-TU-S25	NFF Graminhais	Ribeira	SMG-GR-T-07	26S	654838	4185138	BALA	1999	July	Turquin	PT-TU-S25	244	Alestrus dolosus (Crotch)	Alestrus	dolosus		(Crotch, 1867)	Elateridae	Coleoptera	Insecta	E	A_END	H	3	0	0	0	0	3	3
SMG-GR-T-07_PT-TU-S09	NFF Graminhais	Ribeira	SMG-GR-T-07	26S	654838	4185138	BALA	1999	July	Turquin	PT-TU-S09	244	Alestrus dolosus (Crotch)	Alestrus	dolosus		(Crotch, 1867)	Elateridae	Coleoptera	Insecta	E	A_END	H	6	0	0	0	0	6	6
SMG-GR-T-07_PT-TU-S07	NFF Graminhais	Ribeira	SMG-GR-T-07	26S	654838	4185138	BALA	1999	July	Turquin	PT-TU-S07	244	Alestrus dolosus (Crotch)	Alestrus	dolosus		(Crotch, 1867)	Elateridae	Coleoptera	Insecta	E	A_END	H	8	0	0	0	0	8	8
SMG-GR-T-07_PT-TU-S13	NFF Graminhais	Ribeira	SMG-GR-T-07	26S	654838	4185138	BALA	1999	July	Turquin	PT-TU-S13	244	Alestrus dolosus (Crotch)	Alestrus	dolosus		(Crotch, 1867)	Elateridae	Coleoptera	Insecta	E	A_END	H	6	0	0	0	0	6	6
SMG-GR-T-07_PT-TU-S27	NFF Graminhais	Ribeira	SMG-GR-T-07	26S	654838	4185138	BALA	1999	July	Turquin	PT-TU-S27	244	Alestrus dolosus (Crotch)	Alestrus	dolosus		(Crotch, 1867)	Elateridae	Coleoptera	Insecta	E	A_END	H	7	0	0	0	0	7	7
SMG-GR-T-07_PT-TU-S01	NFF Graminhais	Ribeira	SMG-GR-T-07	26S	654838	4185138	BALA	1999	July	Turquin	PT-TU-S01	244	Alestrus dolosus (Crotch)	Alestrus	dolosus		(Crotch, 1867)	Elateridae	Coleoptera	Insecta	E	A_END	H	2	0	0	0	0	2	2
SMG-GR-T-07_PT-TU-S11	NFF Graminhais	Ribeira	SMG-GR-T-07	26S	654838	4185138	BALA	1999	July	Turquin	PT-TU-S11	244	Alestrus dolosus (Crotch)	Alestrus	dolosus		(Crotch, 1867)	Elateridae	Coleoptera	Insecta	E	A_END	H	3	0	0	0	0	3	3
SMG-GR-T-07_PT-ET-S28	NFF Graminhais	Ribeira	SMG-GR-T-07	26S	654838	4185138	BALA	1999	July	Ethylene	PT-ET-S28	244	Alestrus dolosus (Crotch)	Alestrus	dolosus		(Crotch, 1867)	Elateridae	Coleoptera	Insecta	E	A_END	H	1	0	0	0	0	1	1
SMG-GR-T-07_PT-ET-S22	NFF Graminhais	Ribeira	SMG-GR-T-07	26S	654838	4185138	BALA	1999	July	Ethylene	PT-ET-S22	244	Alestrus dolosus (Crotch)	Alestrus	dolosus		(Crotch, 1867)	Elateridae	Coleoptera	Insecta	E	A_END	H	1	0	0	0	0	1	1
SMG-GR-T-07_PT-ET-S18	NFF Graminhais	Ribeira	SMG-GR-T-07	26S	654838	4185138	BALA	1999	July	Ethylene	PT-ET-S18	244	Alestrus dolosus (Crotch)	Alestrus	dolosus		(Crotch, 1867)	Elateridae	Coleoptera	Insecta	E	A_END	H	2	0	0	0	0	2	2
SMG-GR-T-07_PT-ET-S08	NFF Graminhais	Ribeira	SMG-GR-T-07	26S	654838	4185138	BALA	1999	July	Ethylene	PT-ET-S08	244	Alestrus dolosus (Crotch)	Alestrus	dolosus		(Crotch, 1867)	Elateridae	Coleoptera	Insecta	E	A_END	H	2	0	0	0	0	2	2
SMG-GR-T-07_PT-ET-S12	NFF Graminhais	Ribeira	SMG-GR-T-07	26S	654838	4185138	BALA	1999	July	Ethylene	PT-ET-S12	244	Alestrus dolosus (Crotch)	Alestrus	dolosus		(Crotch, 1867)	Elateridae	Coleoptera	Insecta	E	A_END	H	1	0	0	0	0	1	1
SMG-GR-T-07_PT-ET-S10	NFF Graminhais	Ribeira	SMG-GR-T-07	26S	654838	4185138	BALA2	2010	june	Ethylene	PT-ET-S10	244	Alestrus dolosus (Crotch)	Alestrus	dolosus		(Crotch, 1867)	Elateridae	Coleoptera	Insecta	E	A_END	H	3	0	0	0	0	3	3
SMG-GR-T-07_PT-ET-S30	NFF Graminhais	Ribeira	SMG-GR-T-07	26S	654838	4185138	BALA2	2010	june	Ethylene	PT-ET-S30	244	Alestrus dolosus (Crotch)	Alestrus	dolosus		(Crotch, 1867)	Elateridae	Coleoptera	Insecta	E	A_END	H	1	0	0	0	0	1	1
SMG-GR-T-07_PT-ET-S16	NFF Graminhais	Ribeira	SMG-GR-T-07	26S	654838	4185138	BALA2	2010	june	Ethylene	PT-ET-S16	244	Alestrus dolosus (Crotch)	Alestrus	dolosus		(Crotch, 1867)	Elateridae	Coleoptera	Insecta	E	A_END	H	1	0	0	0	0	1	1
SMG-GR-T-07_PT-ET-S12	NFF Graminhais	Ribeira	SMG-GR-T-07	26S	654838	4185138	BALA2	2010	june	Ethylene	PT-ET-S12	244	Alestrus dolosus (Crotch)	Alestrus	dolosus		(Crotch, 1867)	Elateridae	Coleoptera	Insecta	E	A_END	H	1	0	0	0	0	1	1
SMG-GR-T-07_PT-ET-S24	NFF Graminhais	Ribeira	SMG-GR-T-07	26S	654838	4185138	BALA2	2010	june	Ethylene	PT-ET-S24	244	Alestrus dolosus (Crotch)	Alestrus	dolosus		(Crotch, 1867)	Elateridae	Coleoptera	Insecta	E	A_END	H	1	0	0	0	0	1	1
SMG-GR-T-07_PT-TU-S27	NFF Graminhais	Ribeira	SMG-GR-T-07	26S	654838	4185138	BALA2	2010	june	Turquin	PT-TU-S27	244	Alestrus dolosus (Crotch)	Alestrus	dolosus		(Crotch, 1867)	Elateridae	Coleoptera	Insecta	E	A_END	H	19	0	0	0	0	19	19
SMG-GR-T-07_PT-TU-S13	NFF Graminhais	Ribeira	SMG-GR-T-07	26S	654838	4185138	BALA2	2010	june	Turquin	PT-TU-S13	244	Alestrus dolosus (Crotch)	Alestrus	dolosus		(Crotch, 1867)	Elateridae	Coleoptera	Insecta	E	A_END	H	5	0	0	0	0	5	5
SMG-GR-T-07_PT-TU-S21	NFF Graminhais	Ribeira	SMG-GR-T-07	26S	654838	4185138	BALA2	2010	june	Turquin	PT-TU-S21	244	Alestrus dolosus (Crotch)	Alestrus	dolosus		(Crotch, 1867)	Elateridae	Coleoptera	Insecta	E	A_END	H	4	0	0	0	0	4	4
SMG-GR-T-07_PT-TU-S23	NFF Graminhais	Ribeira	SMG-GR-T-07	26S	654838	4185138	BALA2	2010	june	Turquin	PT-TU-S23	244	Alestrus dolosus (Crotch)	Alestrus	dolosus		(Crotch, 1867)	Elateridae	Coleoptera	Insecta	E	A_END	H	2	0	0	0	0	2	2
SMG-GR-T-07_PT-TU-S09	NFF Graminhais	Ribeira	SMG-GR-T-07	26S	654838	4185138	BALA2	2010	june	Turquin	PT-TU-S09	244	Alestrus dolosus (Crotch)	Alestrus	dolosus		(Crotch, 1867)	Elateridae	Coleoptera	Insecta	E	A_END	H	1	0	0	0	0	1	1
SMG-GR-T-07_PT-TU-S15	NFF Graminhais	Ribeira	SMG-GR-T-07	26S	654838	4185138	BALA2	2010	june	Turquin	PT-TU-S15	244	Alestrus dolosus (Crotch)	Alestrus	dolosus		(Crotch, 1867)	Elateridae	Coleoptera	Insecta	E	A_END	H	3	0	0	0	0	3	3
SMG-GR-T-07_PT-TU-S25	NFF Graminhais	Ribeira	SMG-GR-T-07	26S	654838	4185138	BALA2	2010	june	Turquin	PT-TU-S25	244	Alestrus dolosus (Crotch)	Alestrus	dolosus		(Crotch, 1867)	Elateridae	Coleoptera	Insecta	E	A_END	H	2	0	0	0	0	2	2
SMG-GR-T-07_PT-TU-S29	NFF Graminhais	Ribeira	SMG-GR-T-07	26S	654838	4185138	BALA2	2010	june	Turquin	PT-TU-S29	244	Alestrus dolosus (Crotch)	Alestrus	dolosus		(Crotch, 1867)	Elateridae	Coleoptera	Insecta	E	A_END	H	3	0	0	0	0	3	3
SMG-GR-T-07_PT-TU-S17	NFF Graminhais	Ribeira	SMG-GR-T-07	26S	654838	4185138	BALA2	2010	june	Turquin	PT-TU-S17	244	Alestrus dolosus (Crotch)	Alestrus	dolosus		(Crotch, 1867)	Elateridae	Coleoptera	Insecta	E	A_END	H	2	0	0	0	0	2	2
SMG-GR-T-07_PT-TU-S03	NFF Graminhais	Ribeira	SMG-GR-T-07	26S	654838	4185138	BALA2	2010	june	Turquin	PT-TU-S03	244	Alestrus dolosus (Crotch)	Alestrus	dolosus		(Crotch, 1867)	Elateridae	Coleoptera	Insecta	E	A_END	H	1	0	0	0	0	1	1
SMG-GR-T-07_PT-TU-S05	NFF Graminhais	Ribeira	SMG-GR-T-07	26S	654838	4185138	BALA2	2010	june	Turquin	PT-TU-S05	244	Alestrus dolosus (Crotch)	Alestrus	dolosus		(Crotch, 1867)	Elateridae	Coleoptera	Insecta	E	A_END	H	5	0	0	0	0	5	5
SMG-GR-T-07_PT-TU-S19	NFF Graminhais	Ribeira	SMG-GR-T-07	26S	654838	4185138	BALA2	2010	june	Turquin	PT-TU-S19	244	Alestrus dolosus (Crotch)	Alestrus	dolosus		(Crotch, 1867)	Elateridae	Coleoptera	Insecta	E	A_END	H	4	0	0	0	0	4	4
SMG-GR-T-07_PT-TU-S11	NFF Graminhais	Ribeira	SMG-GR-T-07	26S	654838	4185138	BALA2	2010	june	Turquin	PT-TU-S11	244	Alestrus dolosus (Crotch)	Alestrus	dolosus		(Crotch, 1867)	Elateridae	Coleoptera	Insecta	E	A_END	H	12	0	0	0	0	12	12
SMG-GR-T-14_PT-TU-S29	NFF Graminhais	Ao longo ribeira	SMG-GR-T-14	26S	654669	4185360	PhD Clara	2004	June	Turquin	PT-TU-S29	244	Alestrus dolosus (Crotch)	Alestrus	dolosus		(Crotch, 1867)	Elateridae	Coleoptera	Insecta	E	A_END	H	5	0	0	0	0	5	5
SMG-GR-T-14_PT-TU-S17	NFF Graminhais	Ao longo ribeira	SMG-GR-T-14	26S	654669	4185360	PhD Clara	2004	June	Turquin	PT-TU-S17	244	Alestrus dolosus (Crotch)	Alestrus	dolosus		(Crotch, 1867)	Elateridae	Coleoptera	Insecta	E	A_END	H	2	0	0	0	0	2	2
SMG-GR-T-14_PT-ET-S26	NFF Graminhais	Ao longo ribeira	SMG-GR-T-14	26S	654669	4185360	PhD Clara	2004	June	Ethylene	PT-ET-S26	244	Alestrus dolosus (Crotch)	Alestrus	dolosus		(Crotch, 1867)	Elateridae	Coleoptera	Insecta	E	A_END	H	1	0	0	0	0	1	1
SMG-GR-T-14_PT-ET-S18	NFF Graminhais	Ao longo ribeira	SMG-GR-T-14	26S	654669	4185360	PhD Clara	2004	June	Ethylene	PT-ET-S18	244	Alestrus dolosus (Crotch)	Alestrus	dolosus		(Crotch, 1867)	Elateridae	Coleoptera	Insecta	E	A_END	H	1	0	0	0	0	1	1
SMG-GR-T-14_PT-ET-S30	NFF Graminhais	Ao longo ribeira	SMG-GR-T-14	26S	654669	4185360	PhD Clara	2004	June	Ethylene	PT-ET-S30	244	Alestrus dolosus (Crotch)	Alestrus	dolosus		(Crotch, 1867)	Elateridae	Coleoptera	Insecta	E	A_END	H	1	0	0	0	0	1	1
SMG-GR-T-14_PT-TU-S07	NFF Graminhais	Ao longo ribeira	SMG-GR-T-14	26S	654669	4185360	PhD Clara	2004	June	Turquin	PT-TU-S07	244	Alestrus dolosus (Crotch)	Alestrus	dolosus		(Crotch, 1867)	Elateridae	Coleoptera	Insecta	E	A_END	H	1	0	0	0	0	1	1
SMG-GR-T-14_PT-TU-S25	NFF Graminhais	Ao longo ribeira	SMG-GR-T-14	26S	654669	4185360	PhD Clara	2004	June	Turquin	PT-TU-S25	244	Alestrus dolosus (Crotch)	Alestrus	dolosus		(Crotch, 1867)	Elateridae	Coleoptera	Insecta	E	A_END	H	2	0	0	0	0	2	2
SMG-GR-T-14_PT-TU-S27	NFF Graminhais	Ao longo ribeira	SMG-GR-T-14	26S	654669	4185360	PhD Clara	2004	June	Turquin	PT-TU-S27	244	Alestrus dolosus (Crotch)	Alestrus	dolosus		(Crotch, 1867)	Elateridae	Coleoptera	Insecta	E	A_END	H	1	0	0	0	0	1	1
SMG-GR-T-14_PT-TU-S23	NFF Graminhais	Ao longo ribeira	SMG-GR-T-14	26S	654669	4185360	PhD Clara	2004	June	Turquin	PT-TU-S23	244	Alestrus dolosus (Crotch)	Alestrus	dolosus		(Crotch, 1867)	Elateridae	Coleoptera	Insecta	E	A_END	H	1	0	0	0	0	1	1
SMG-GR-T-15_PT-TU-S21	NFF Graminhais	Veg baixa e fechada	SMG-GR-T-15	26S	654385	4185571	PhD Clara	2004	June	Turquin	PT-TU-S21	244	Alestrus dolosus (Crotch)	Alestrus	dolosus		(Crotch, 1867)	Elateridae	Coleoptera	Insecta	E	A_END	H	17	0	0	0	0	17	17
SMG-GR-T-15_PT-TU-S27	NFF Graminhais	Veg baixa e fechada	SMG-GR-T-15	26S	654385	4185571	PhD Clara	2004	June	Turquin	PT-TU-S27	244	Alestrus dolosus (Crotch)	Alestrus	dolosus		(Crotch, 1867)	Elateridae	Coleoptera	Insecta	E	A_END	H	1	0	0	0	0	1	1
SMG-GR-T-15_PT-ET-S22	NFF Graminhais	Veg baixa e fechada	SMG-GR-T-15	26S	654385	4185571	PhD Clara	2004	June	Ethylene	PT-ET-S22	244	Alestrus dolosus (Crotch)	Alestrus	dolosus		(Crotch, 1867)	Elateridae	Coleoptera	Insecta	E	A_END	H	1	0	0	0	0	1	1
SMG-GR-T-15_PT-TU-S05	NFF Graminhais	Veg baixa e fechada	SMG-GR-T-15	26S	654385	4185571	PhD Clara	2004	June	Turquin	PT-TU-S05	244	Alestrus dolosus (Crotch)	Alestrus	dolosus		(Crotch, 1867)	Elateridae	Coleoptera	Insecta	E	A_END	H	1	0	0	0	0	1	1
SMG-GR-T-15_PT-TU-S09	NFF Graminhais	Veg baixa e fechada	SMG-GR-T-15	26S	654385	4185571	PhD Clara	2004	June	Turquin	PT-TU-S09	244	Alestrus dolosus (Crotch)	Alestrus	dolosus		(Crotch, 1867)	Elateridae	Coleoptera	Insecta	E	A_END	H	2	0	0	0	0	2	2
SMG-GR-T-15_PT-ET-S10	NFF Graminhais	Veg baixa e fechada	SMG-GR-T-15	26S	654385	4185571	PhD Clara	2004	June	Ethylene	PT-ET-S10	244	Alestrus dolosus (Crotch)	Alestrus	dolosus		(Crotch, 1867)	Elateridae	Coleoptera	Insecta	E	A_END	H	1	0	0	0	0	1	1
SMG-GR-T-15_PT-TU-S11	NFF Graminhais	Veg baixa e fechada	SMG-GR-T-15	26S	654385	4185571	PhD Clara	2004	June	Turquin	PT-TU-S11	244	Alestrus dolosus (Crotch)	Alestrus	dolosus		(Crotch, 1867)	Elateridae	Coleoptera	Insecta	E	A_END	H	6	0	0	0	0	6	6
SMG-GR-T-15_PT-TU-S13	NFF Graminhais	Veg baixa e fechada	SMG-GR-T-15	26S	654385	4185571	PhD Clara	2004	June	Turquin	PT-TU-S13	244	Alestrus dolosus (Crotch)	Alestrus	dolosus		(Crotch, 1867)	Elateridae	Coleoptera	Insecta	E	A_END	H	1	0	0	0	0	1	1
SMG-GR-T-15_PT-TU-S03	NFF Graminhais	Veg baixa e fechada	SMG-GR-T-15	26S	654385	4185571	PhD Clara	2004	June	Turquin	PT-TU-S03	244	Alestrus dolosus (Crotch)	Alestrus	dolosus		(Crotch, 1867)	Elateridae	Coleoptera	Insecta	E	A_END	H	2	0	0	0	0	2	2
SMG-GR-T-15_PT-TU-S07	NFF Graminhais	Veg baixa e fechada	SMG-GR-T-15	26S	654385	4185571	PhD Clara	2004	June	Turquin	PT-TU-S07	244	Alestrus dolosus (Crotch)	Alestrus	dolosus		(Crotch, 1867)	Elateridae	Coleoptera	Insecta	E	A_END	H	1	0	0	0	0	1	1
SMG-GR-T-15_PT-TU-S23	NFF Graminhais	Veg baixa e fechada	SMG-GR-T-15	26S	654385	4185571	PhD Clara	2004	June	Turquin	PT-TU-S23	244	Alestrus dolosus (Crotch)	Alestrus	dolosus		(Crotch, 1867)	Elateridae	Coleoptera	Insecta	E	A_END	H	1	0	0	0	0	1	1
SMG-GR-T-15_PT-TU-S29	NFF Graminhais	Veg baixa e fechada	SMG-GR-T-15	26S	654385	4185571	PhD Clara	2004	June	Turquin	PT-TU-S29	244	Alestrus dolosus (Crotch)	Alestrus	dolosus		(Crotch, 1867)	Elateridae	Coleoptera	Insecta	E	A_END	H	1	0	0	0	0	1	1
SMG-GR-T-15_PT-TU-S15	NFF Graminhais	Veg baixa e fechada	SMG-GR-T-15	26S	654385	4185571	PhD Clara	2004	June	Turquin	PT-TU-S15	244	Alestrus dolosus (Crotch)	Alestrus	dolosus		(Crotch, 1867)	Elateridae	Coleoptera	Insecta	E	A_END	H	1	0	0	0	0	1	1
SMG-GR-T-15_PT-TU-S19	NFF Graminhais	Veg baixa e fechada	SMG-GR-T-15	26S	654385	4185571	PhD Clara	2004	June	Turquin	PT-TU-S19	244	Alestrus dolosus (Crotch)	Alestrus	dolosus		(Crotch, 1867)	Elateridae	Coleoptera	Insecta	E	A_END	H	3	0	0	0	0	3	3
SMG-PV-T-01_PT-TU-S21	NFF Pico da Vara	Miradouro Tronqueira	SMG-PV-T-01	26S	659806	4184815	BALA	1999	August	Turquin	PT-TU-S21	244	Alestrus dolosus (Crotch)	Alestrus	dolosus		(Crotch, 1867)	Elateridae	Coleoptera	Insecta	E	A_END	H	3	0	0	0	0	3	3
SMG-PV-T-01_PT-TU-S17	NFF Pico da Vara	Miradouro Tronqueira	SMG-PV-T-01	26S	659806	4184815	BALA	1999	August	Turquin	PT-TU-S17	244	Alestrus dolosus (Crotch)	Alestrus	dolosus		(Crotch, 1867)	Elateridae	Coleoptera	Insecta	E	A_END	H	2	0	0	0	0	2	2
SMG-PV-T-01_PT-TU-S09	NFF Pico da Vara	Miradouro Tronqueira	SMG-PV-T-01	26S	659806	4184815	BALA	1999	August	Turquin	PT-TU-S09	244	Alestrus dolosus (Crotch)	Alestrus	dolosus		(Crotch, 1867)	Elateridae	Coleoptera	Insecta	E	A_END	H	1	0	0	0	0	1	1
SMG-PV-T-01_PT-TU-S15	NFF Pico da Vara	Miradouro Tronqueira	SMG-PV-T-01	26S	659806	4184815	BALA	1999	August	Turquin	PT-TU-S15	244	Alestrus dolosus (Crotch)	Alestrus	dolosus		(Crotch, 1867)	Elateridae	Coleoptera	Insecta	E	A_END	H	1	0	0	0	0	1	1
SMG-PV-T-01_PT-TU-S27	NFF Pico da Vara	Miradouro Tronqueira	SMG-PV-T-01	26S	659806	4184815	BALA	1999	August	Turquin	PT-TU-S27	244	Alestrus dolosus (Crotch)	Alestrus	dolosus		(Crotch, 1867)	Elateridae	Coleoptera	Insecta	E	A_END	H	1	0	0	0	0	1	1
SMG-PV-T-01_PT-TU-S25	NFF Pico da Vara	Miradouro Tronqueira	SMG-PV-T-01	26S	659806	4184815	BALA	1999	August	Turquin	PT-TU-S25	244	Alestrus dolosus (Crotch)	Alestrus	dolosus		(Crotch, 1867)	Elateridae	Coleoptera	Insecta	E	A_END	H	2	0	0	0	0	2	2
SMG-PV-T-01_PT-TU-S23	NFF Pico da Vara	Miradouro Tronqueira	SMG-PV-T-01	26S	659806	4184815	BALA	1999	August	Turquin	PT-TU-S23	244	Alestrus dolosus (Crotch)	Alestrus	dolosus		(Crotch, 1867)	Elateridae	Coleoptera	Insecta	E	A_END	H	2	0	0	0	0	2	2
SMG-PV-T-01_PT-ET-S24	NFF Pico da Vara	Miradouro Tronqueira	SMG-PV-T-01	26S	659806	4184815	BALA	1999	August	Ethylene	PT-ET-S24	244	Alestrus dolosus (Crotch)	Alestrus	dolosus		(Crotch, 1867)	Elateridae	Coleoptera	Insecta	E	A_END	H	1	0	0	0	0	1	1
SMG-PV-T-01_PT-ET-S28	NFF Pico da Vara	Miradouro Tronqueira	SMG-PV-T-01	26S	659806	4184815	BALA	1999	August	Ethylene	PT-ET-S28	244	Alestrus dolosus (Crotch)	Alestrus	dolosus		(Crotch, 1867)	Elateridae	Coleoptera	Insecta	E	A_END	H	1	0	0	0	0	1	1
SMG-PV-T-01_PT-ET-S04	NFF Pico da Vara	Miradouro Tronqueira	SMG-PV-T-01	26S	659806	4184815	BALA2	2010	june	Ethylene	PT-ET-S04	244	Alestrus dolosus (Crotch)	Alestrus	dolosus		(Crotch, 1867)	Elateridae	Coleoptera	Insecta	E	A_END	H	1	0	0	0	0	1	1
SMG-PV-T-01_PT-ET-S28	NFF Pico da Vara	Miradouro Tronqueira	SMG-PV-T-01	26S	659806	4184815	BALA2	2010	june	Ethylene	PT-ET-S28	244	Alestrus dolosus (Crotch)	Alestrus	dolosus		(Crotch, 1867)	Elateridae	Coleoptera	Insecta	E	A_END	H	1	0	0	0	0	1	1
SMG-PV-T-01_PT-TU-S19	NFF Pico da Vara	Miradouro Tronqueira	SMG-PV-T-01	26S	659806	4184815	BALA2	2010	june	Turquin	PT-TU-S19	244	Alestrus dolosus (Crotch)	Alestrus	dolosus		(Crotch, 1867)	Elateridae	Coleoptera	Insecta	E	A_END	H	8	0	0	0	0	8	8
SMG-PV-T-01_PT-TU-S11	NFF Pico da Vara	Miradouro Tronqueira	SMG-PV-T-01	26S	659806	4184815	BALA2	2010	june	Turquin	PT-TU-S11	244	Alestrus dolosus (Crotch)	Alestrus	dolosus		(Crotch, 1867)	Elateridae	Coleoptera	Insecta	E	A_END	H	1	0	0	0	0	1	1
SMG-PV-T-01_PT-TU-S03	NFF Pico da Vara	Miradouro Tronqueira	SMG-PV-T-01	26S	659806	4184815	BALA2	2010	june	Turquin	PT-TU-S03	244	Alestrus dolosus (Crotch)	Alestrus	dolosus		(Crotch, 1867)	Elateridae	Coleoptera	Insecta	E	A_END	H	11	0	0	0	0	11	11
SMG-PV-T-01_PT-TU-S01	NFF Pico da Vara	Miradouro Tronqueira	SMG-PV-T-01	26S	659806	4184815	BALA2	2010	june	Turquin	PT-TU-S01	244	Alestrus dolosus (Crotch)	Alestrus	dolosus		(Crotch, 1867)	Elateridae	Coleoptera	Insecta	E	A_END	H	4	0	0	0	0	4	4
SMG-PV-T-01_PT-TU-S05	NFF Pico da Vara	Miradouro Tronqueira	SMG-PV-T-01	26S	659806	4184815	BALA2	2010	june	Turquin	PT-TU-S05	244	Alestrus dolosus (Crotch)	Alestrus	dolosus		(Crotch, 1867)	Elateridae	Coleoptera	Insecta	E	A_END	H	8	0	0	0	0	8	8
SMG-PV-T-01_PT-TU-S07	NFF Pico da Vara	Miradouro Tronqueira	SMG-PV-T-01	26S	659806	4184815	BALA2	2010	june	Turquin	PT-TU-S07	244	Alestrus dolosus (Crotch)	Alestrus	dolosus		(Crotch, 1867)	Elateridae	Coleoptera	Insecta	E	A_END	H	1	0	0	0	0	1	1
SMG-PV-T-01_PT-TU-S23	NFF Pico da Vara	Miradouro Tronqueira	SMG-PV-T-01	26S	659806	4184815	BALA2	2010	june	Turquin	PT-TU-S23	244	Alestrus dolosus (Crotch)	Alestrus	dolosus		(Crotch, 1867)	Elateridae	Coleoptera	Insecta	E	A_END	H	3	0	0	0	0	3	3
SMG-PV-T-01_PT-TU-S27	NFF Pico da Vara	Miradouro Tronqueira	SMG-PV-T-01	26S	659806	4184815	BALA2	2010	june	Turquin	PT-TU-S27	244	Alestrus dolosus (Crotch)	Alestrus	dolosus		(Crotch, 1867)	Elateridae	Coleoptera	Insecta	E	A_END	H	5	0	0	0	0	5	5
SMG-PV-T-01_PT-TU-S25	NFF Pico da Vara	Miradouro Tronqueira	SMG-PV-T-01	26S	659806	4184815	BALA2	2010	june	Turquin	PT-TU-S25	244	Alestrus dolosus (Crotch)	Alestrus	dolosus		(Crotch, 1867)	Elateridae	Coleoptera	Insecta	E	A_END	H	5	0	0	0	0	5	5
SMG-PV-T-01_PT-TU-S17	NFF Pico da Vara	Miradouro Tronqueira	SMG-PV-T-01	26S	659806	4184815	BALA2	2010	june	Turquin	PT-TU-S17	244	Alestrus dolosus (Crotch)	Alestrus	dolosus		(Crotch, 1867)	Elateridae	Coleoptera	Insecta	E	A_END	H	1	0	0	0	0	1	1
SMG-PV-T-04_PT-ET-S02	NFF Pico da Vara	Miradouro inferior	SMG-PV-T-04	26S	659850	4184997	BALA	1999	August	Ethylene	PT-ET-S02	244	Alestrus dolosus (Crotch)	Alestrus	dolosus		(Crotch, 1867)	Elateridae	Coleoptera	Insecta	E	A_END	H	1	0	0	0	0	1	1
SMG-PV-T-04_PT-ET-S30	NFF Pico da Vara	Miradouro inferior	SMG-PV-T-04	26S	659850	4184997	BALA	1999	August	Ethylene	PT-ET-S30	244	Alestrus dolosus (Crotch)	Alestrus	dolosus		(Crotch, 1867)	Elateridae	Coleoptera	Insecta	E	A_END	H	1	0	0	0	0	1	1
SMG-PV-T-04_PT-TU-S15	NFF Pico da Vara	Miradouro inferior	SMG-PV-T-04	26S	659850	4184997	BALA	1999	August	Turquin	PT-TU-S15	244	Alestrus dolosus (Crotch)	Alestrus	dolosus		(Crotch, 1867)	Elateridae	Coleoptera	Insecta	E	A_END	H	5	0	0	0	0	5	5
SMG-PV-T-04_PT-TU-S03	NFF Pico da Vara	Miradouro inferior	SMG-PV-T-04	26S	659850	4184997	BALA	1999	August	Turquin	PT-TU-S03	244	Alestrus dolosus (Crotch)	Alestrus	dolosus		(Crotch, 1867)	Elateridae	Coleoptera	Insecta	E	A_END	H	2	0	0	0	0	2	2
SMG-PV-T-04_PT-TU-S21	NFF Pico da Vara	Miradouro inferior	SMG-PV-T-04	26S	659850	4184997	BALA	1999	August	Turquin	PT-TU-S21	244	Alestrus dolosus (Crotch)	Alestrus	dolosus		(Crotch, 1867)	Elateridae	Coleoptera	Insecta	E	A_END	H	2	0	0	0	0	2	2
SMG-PV-T-04_PT-TU-S07	NFF Pico da Vara	Miradouro inferior	SMG-PV-T-04	26S	659850	4184997	BALA	1999	August	Turquin	PT-TU-S07	244	Alestrus dolosus (Crotch)	Alestrus	dolosus		(Crotch, 1867)	Elateridae	Coleoptera	Insecta	E	A_END	H	1	0	0	0	0	1	1
SMG-PV-T-04_PT-TU-S23	NFF Pico da Vara	Miradouro inferior	SMG-PV-T-04	26S	659850	4184997	BALA	1999	August	Turquin	PT-TU-S23	244	Alestrus dolosus (Crotch)	Alestrus	dolosus		(Crotch, 1867)	Elateridae	Coleoptera	Insecta	E	A_END	H	1	0	0	0	0	1	1
SMG-PV-T-04_PT-TU-S13	NFF Pico da Vara	Miradouro inferior	SMG-PV-T-04	26S	659850	4184997	BALA	1999	August	Turquin	PT-TU-S13	244	Alestrus dolosus (Crotch)	Alestrus	dolosus		(Crotch, 1867)	Elateridae	Coleoptera	Insecta	E	A_END	H	5	0	0	0	0	5	5
SMG-PV-T-04_PT-TU-S01	NFF Pico da Vara	Miradouro inferior	SMG-PV-T-04	26S	659850	4184997	BALA	1999	August	Turquin	PT-TU-S01	244	Alestrus dolosus (Crotch)	Alestrus	dolosus		(Crotch, 1867)	Elateridae	Coleoptera	Insecta	E	A_END	H	2	0	0	0	0	2	2
SMG-PV-T-04_PT-TU-S29	NFF Pico da Vara	Miradouro inferior	SMG-PV-T-04	26S	659850	4184997	BALA	1999	August	Turquin	PT-TU-S29	244	Alestrus dolosus (Crotch)	Alestrus	dolosus		(Crotch, 1867)	Elateridae	Coleoptera	Insecta	E	A_END	H	3	0	0	0	0	3	3
SMG-PV-T-04_PT-TU-S25	NFF Pico da Vara	Miradouro inferior	SMG-PV-T-04	26S	659850	4184997	BALA	1999	August	Turquin	PT-TU-S25	244	Alestrus dolosus (Crotch)	Alestrus	dolosus		(Crotch, 1867)	Elateridae	Coleoptera	Insecta	E	A_END	H	2	0	0	0	0	2	2
SMG-PV-T-04_PT-TU-S19	NFF Pico da Vara	Miradouro inferior	SMG-PV-T-04	26S	659850	4184997	BALA	1999	August	Turquin	PT-TU-S19	244	Alestrus dolosus (Crotch)	Alestrus	dolosus		(Crotch, 1867)	Elateridae	Coleoptera	Insecta	E	A_END	H	2	0	0	0	0	2	2
SMG-PV-T-04_PT-TU-S15	NFF Pico da Vara	Miradouro inferior	SMG-PV-T-04	26S	659850	4184997	BALA2	2010	june	Turquin	PT-TU-S15	244	Alestrus dolosus (Crotch)	Alestrus	dolosus		(Crotch, 1867)	Elateridae	Coleoptera	Insecta	E	A_END	H	1	0	0	0	0	1	1
SMG-PV-T-05_PT-TU-S05	NFF Pico da Vara	Tronqueira Rib Guilherme	SMG-PV-T-05	26S	659799	4185142	BALA	2000	July	Turquin	PT-TU-S05	244	Alestrus dolosus (Crotch)	Alestrus	dolosus		(Crotch, 1867)	Elateridae	Coleoptera	Insecta	E	A_END	H	2	0	0	0	0	2	2
SMG-PV-T-05_PT-TU-S01	NFF Pico da Vara	Tronqueira Rib Guilherme	SMG-PV-T-05	26S	659799	4185142	BALA	2000	July	Turquin	PT-TU-S01	244	Alestrus dolosus (Crotch)	Alestrus	dolosus		(Crotch, 1867)	Elateridae	Coleoptera	Insecta	E	A_END	H	4	0	0	0	0	4	4
SMG-PV-T-05_PT-TU-S03	NFF Pico da Vara	Tronqueira Rib Guilherme	SMG-PV-T-05	26S	659799	4185142	BALA	2000	July	Turquin	PT-TU-S03	244	Alestrus dolosus (Crotch)	Alestrus	dolosus		(Crotch, 1867)	Elateridae	Coleoptera	Insecta	E	A_END	H	16	0	0	0	0	16	16
SMG-PV-T-05_PT-TU-S13	NFF Pico da Vara	Tronqueira Rib Guilherme	SMG-PV-T-05	26S	659799	4185142	BALA	2000	July	Turquin	PT-TU-S13	244	Alestrus dolosus (Crotch)	Alestrus	dolosus		(Crotch, 1867)	Elateridae	Coleoptera	Insecta	E	A_END	H	1	0	0	0	0	1	1
SMG-PV-T-05_PT-TU-S07	NFF Pico da Vara	Tronqueira Rib Guilherme	SMG-PV-T-05	26S	659799	4185142	BALA	2000	July	Turquin	PT-TU-S07	244	Alestrus dolosus (Crotch)	Alestrus	dolosus		(Crotch, 1867)	Elateridae	Coleoptera	Insecta	E	A_END	H	3	0	0	0	0	3	3
SMG-PV-T-05_PT-TU-S19	NFF Pico da Vara	Tronqueira Rib Guilherme	SMG-PV-T-05	26S	659799	4185142	BALA	2000	July	Turquin	PT-TU-S19	244	Alestrus dolosus (Crotch)	Alestrus	dolosus		(Crotch, 1867)	Elateridae	Coleoptera	Insecta	E	A_END	H	3	0	0	0	0	3	3
SMG-PV-T-05_PT-TU-S21	NFF Pico da Vara	Tronqueira Rib Guilherme	SMG-PV-T-05	26S	659799	4185142	BALA	2000	July	Turquin	PT-TU-S21	244	Alestrus dolosus (Crotch)	Alestrus	dolosus		(Crotch, 1867)	Elateridae	Coleoptera	Insecta	E	A_END	H	1	0	0	0	0	1	1
SMG-PV-T-05_PT-TU-S09	NFF Pico da Vara	Tronqueira Rib Guilherme	SMG-PV-T-05	26S	659799	4185142	BALA	2000	July	Turquin	PT-TU-S09	244	Alestrus dolosus (Crotch)	Alestrus	dolosus		(Crotch, 1867)	Elateridae	Coleoptera	Insecta	E	A_END	H	5	0	0	0	0	5	5
SMG-PV-T-05_PT-ET-S02	NFF Pico da Vara	Tronqueira Rib Guilherme	SMG-PV-T-05	26S	659799	4185142	BALA	2000	July	Ethylene	PT-ET-S02	244	Alestrus dolosus (Crotch)	Alestrus	dolosus		(Crotch, 1867)	Elateridae	Coleoptera	Insecta	E	A_END	H	3	0	0	0	0	3	3
SMG-PV-T-05_PT-ET-S08	NFF Pico da Vara	Tronqueira Rib Guilherme	SMG-PV-T-05	26S	659799	4185142	BALA	2000	July	Ethylene	PT-ET-S08	244	Alestrus dolosus (Crotch)	Alestrus	dolosus		(Crotch, 1867)	Elateridae	Coleoptera	Insecta	E	A_END	H	2	0	0	0	0	2	2
SMG-PV-T-05_PT-ET-S06	NFF Pico da Vara	Tronqueira Rib Guilherme	SMG-PV-T-05	26S	659799	4185142	BALA	2000	July	Ethylene	PT-ET-S06	244	Alestrus dolosus (Crotch)	Alestrus	dolosus		(Crotch, 1867)	Elateridae	Coleoptera	Insecta	E	A_END	H	4	0	0	0	0	4	4
SMG-PV-T-08_PT-TU-S07	NFF Pico da Vara	Pico Vara A	SMG-PV-T-08	26S	657757	4186138	BALA	1999	July	Turquin	PT-TU-S07	244	Alestrus dolosus (Crotch)	Alestrus	dolosus		(Crotch, 1867)	Elateridae	Coleoptera	Insecta	E	A_END	H	1	0	0	0	0	1	1
SMG-PV-T-08_PT-TU-S01	NFF Pico da Vara	Pico Vara A	SMG-PV-T-08	26S	657757	4186138	BALA	1999	July	Turquin	PT-TU-S01	244	Alestrus dolosus (Crotch)	Alestrus	dolosus		(Crotch, 1867)	Elateridae	Coleoptera	Insecta	E	A_END	H	1	0	0	0	0	1	1
SMG-PV-T-08_PT-TU-S17	NFF Pico da Vara	Pico Vara A	SMG-PV-T-08	26S	657757	4186138	BALA	1999	July	Turquin	PT-TU-S17	244	Alestrus dolosus (Crotch)	Alestrus	dolosus		(Crotch, 1867)	Elateridae	Coleoptera	Insecta	E	A_END	H	2	0	0	0	0	2	2
SMG-PV-T-08_PT-TU-S05	NFF Pico da Vara	Pico Vara A	SMG-PV-T-08	26S	657757	4186138	BALA	1999	July	Turquin	PT-TU-S05	244	Alestrus dolosus (Crotch)	Alestrus	dolosus		(Crotch, 1867)	Elateridae	Coleoptera	Insecta	E	A_END	H	2	0	0	0	0	2	2
SMG-PV-T-08_PT-TU-S19	NFF Pico da Vara	Pico Vara A	SMG-PV-T-08	26S	657757	4186138	BALA	1999	July	Turquin	PT-TU-S19	244	Alestrus dolosus (Crotch)	Alestrus	dolosus		(Crotch, 1867)	Elateridae	Coleoptera	Insecta	E	A_END	H	4	0	0	0	0	4	4
SMG-PV-T-08_PT-TU-S21	NFF Pico da Vara	Pico Vara A	SMG-PV-T-08	26S	657757	4186138	BALA	1999	July	Turquin	PT-TU-S21	244	Alestrus dolosus (Crotch)	Alestrus	dolosus		(Crotch, 1867)	Elateridae	Coleoptera	Insecta	E	A_END	H	1	0	0	0	0	1	1
SMG-PV-T-08_PT-TU-S23	NFF Pico da Vara	Pico Vara A	SMG-PV-T-08	26S	657757	4186138	BALA	1999	July	Turquin	PT-TU-S23	244	Alestrus dolosus (Crotch)	Alestrus	dolosus		(Crotch, 1867)	Elateridae	Coleoptera	Insecta	E	A_END	H	1	0	0	0	0	1	1
SMG-PV-T-08_PT-TU-S25	NFF Pico da Vara	Pico Vara A	SMG-PV-T-08	26S	657757	4186138	BALA	1999	July	Turquin	PT-TU-S25	244	Alestrus dolosus (Crotch)	Alestrus	dolosus		(Crotch, 1867)	Elateridae	Coleoptera	Insecta	E	A_END	H	1	0	0	0	0	1	1
SMG-PV-T-08_PT-TU-S03	NFF Pico da Vara	Pico Vara A	SMG-PV-T-08	26S	657757	4186138	BALA	1999	July	Turquin	PT-TU-S03	244	Alestrus dolosus (Crotch)	Alestrus	dolosus		(Crotch, 1867)	Elateridae	Coleoptera	Insecta	E	A_END	H	3	0	0	0	0	3	3
SMG-PV-T-08_PT-ET-S02	NFF Pico da Vara	Pico Vara A	SMG-PV-T-08	26S	657757	4186138	BALA	1999	July	Ethylene	PT-ET-S02	244	Alestrus dolosus (Crotch)	Alestrus	dolosus		(Crotch, 1867)	Elateridae	Coleoptera	Insecta	E	A_END	H	1	0	0	0	0	1	1
SMG-PV-T-08_PT-ET-S06	NFF Pico da Vara	Pico Vara A	SMG-PV-T-08	26S	657757	4186138	BALA	1999	July	Ethylene	PT-ET-S06	244	Alestrus dolosus (Crotch)	Alestrus	dolosus		(Crotch, 1867)	Elateridae	Coleoptera	Insecta	E	A_END	H	1	0	0	0	0	1	1
SMG-PV-T-08_PT-ET-S18	NFF Pico da Vara	Pico Vara A	SMG-PV-T-08	26S	657757	4186138	BALA	1999	July	Ethylene	PT-ET-S18	244	Alestrus dolosus (Crotch)	Alestrus	dolosus		(Crotch, 1867)	Elateridae	Coleoptera	Insecta	E	A_END	H	1	0	0	0	0	1	1
TER-BF-T-01_PT-TU-S01	NFF Biscoito da Ferraria	Labaçal T2 Clara	TER-BF-T-01	26S	480849	4290312	BALA	1999	June	Turquin	PT-TU-S01	244	Alestrus dolosus (Crotch)	Alestrus	dolosus		(Crotch, 1867)	Elateridae	Coleoptera	Insecta	E	A_END	H	2	0	0	0	0	2	2
TER-BF-T-01_PT-TU-S05	NFF Biscoito da Ferraria	Labaçal T2 Clara	TER-BF-T-01	26S	480849	4290312	BALA	1999	June	Turquin	PT-TU-S05	244	Alestrus dolosus (Crotch)	Alestrus	dolosus		(Crotch, 1867)	Elateridae	Coleoptera	Insecta	E	A_END	H	1	0	0	0	0	1	1
TER-BF-T-01_PT-TU-S11	NFF Biscoito da Ferraria	Labaçal T2 Clara	TER-BF-T-01	26S	480849	4290312	BALA	1999	June	Turquin	PT-TU-S11	244	Alestrus dolosus (Crotch)	Alestrus	dolosus		(Crotch, 1867)	Elateridae	Coleoptera	Insecta	E	A_END	H	1	0	0	0	0	1	1
TER-BF-T-01_PT-TU-S15	NFF Biscoito da Ferraria	Labaçal T2 Clara	TER-BF-T-01	26S	480849	4290312	BALA	1999	June	Turquin	PT-TU-S15	244	Alestrus dolosus (Crotch)	Alestrus	dolosus		(Crotch, 1867)	Elateridae	Coleoptera	Insecta	E	A_END	H	5	0	0	0	0	5	5
TER-BF-T-01_PT-TU-S17	NFF Biscoito da Ferraria	Labaçal T2 Clara	TER-BF-T-01	26S	480849	4290312	BALA	1999	June	Turquin	PT-TU-S17	244	Alestrus dolosus (Crotch)	Alestrus	dolosus		(Crotch, 1867)	Elateridae	Coleoptera	Insecta	E	A_END	H	3	0	0	0	0	3	3
TER-BF-T-01_PT-ET-S02	NFF Biscoito da Ferraria	Labaçal T2 Clara	TER-BF-T-01	26S	480849	4290312	BALA	1999	June	Ethylene	PT-ET-S02	244	Alestrus dolosus (Crotch)	Alestrus	dolosus		(Crotch, 1867)	Elateridae	Coleoptera	Insecta	E	A_END	H	1	0	0	0	0	1	1
TER-BF-T-01_PT-ET-S16	NFF Biscoito da Ferraria	Labaçal T2 Clara	TER-BF-T-01	26S	480849	4290312	BALA	1999	June	Ethylene	PT-ET-S16	244	Alestrus dolosus (Crotch)	Alestrus	dolosus		(Crotch, 1867)	Elateridae	Coleoptera	Insecta	E	A_END	H	2	0	0	0	0	2	2
TER-BF-T-01_PT-ET-S28	NFF Biscoito da Ferraria	Labaçal T2 Clara	TER-BF-T-01	26S	480849	4290312	BALA	1999	June	Ethylene	PT-ET-S28	244	Alestrus dolosus (Crotch)	Alestrus	dolosus		(Crotch, 1867)	Elateridae	Coleoptera	Insecta	E	A_END	H	1	0	0	0	0	1	1
TER-BF-T-01_PT-ET-S30	NFF Biscoito da Ferraria	Labaçal T2 Clara	TER-BF-T-01	26S	480849	4290312	BALA	1999	June	Ethylene	PT-ET-S30	244	Alestrus dolosus (Crotch)	Alestrus	dolosus		(Crotch, 1867)	Elateridae	Coleoptera	Insecta	E	A_END	H	4	0	0	0	0	4	4
TER-BF-T-01_PT-ET-S28	NFF Biscoito da Ferraria	Labaçal T2 Clara	TER-BF-T-01	26S	480849	4290312	BALA2	2011	June	Ethylene	PT-ET-S28	244	Alestrus dolosus (Crotch)	Alestrus	dolosus		(Crotch, 1867)	Elateridae	Coleoptera	Insecta	E	A_END	H	1	0	0	0	0	1	1
TER-BF-T-03_PT-ET-S30	NFF Biscoito da Ferraria	Pico Alto	TER-BF-T-03	26S	481809	4289747	PhD Clara	2003	August	Ethylene	PT-ET-S30	244	Alestrus dolosus (Crotch)	Alestrus	dolosus		(Crotch, 1867)	Elateridae	Coleoptera	Insecta	E	A_END	H	1	0	0	0	0	1	1
TER-BF-T-03_PT-ET-S06	NFF Biscoito da Ferraria	Pico Alto	TER-BF-T-03	26S	481809	4289747	PhD Clara	2003	August	Ethylene	PT-ET-S06	244	Alestrus dolosus (Crotch)	Alestrus	dolosus		(Crotch, 1867)	Elateridae	Coleoptera	Insecta	E	A_END	H	1	0	0	0	0	1	1
TER-BF-T-03_PT-TU-S29	NFF Biscoito da Ferraria	Pico Alto	TER-BF-T-03	26S	481809	4289747	PhD Clara	2003	August	Turquin	PT-TU-S29	244	Alestrus dolosus (Crotch)	Alestrus	dolosus		(Crotch, 1867)	Elateridae	Coleoptera	Insecta	E	A_END	H	1	0	0	0	0	1	1
TER-BF-T-03_PT-TU-S15	NFF Biscoito da Ferraria	Pico Alto	TER-BF-T-03	26S	481809	4289747	PhD Clara	2003	August	Turquin	PT-TU-S15	244	Alestrus dolosus (Crotch)	Alestrus	dolosus		(Crotch, 1867)	Elateridae	Coleoptera	Insecta	E	A_END	H	1	0	0	0	0	1	1
TER-BF-T-03_PT-TU-S03	NFF Biscoito da Ferraria	Pico Alto	TER-BF-T-03	26S	481809	4289747	PhD Clara	2003	August	Turquin	PT-TU-S03	244	Alestrus dolosus (Crotch)	Alestrus	dolosus		(Crotch, 1867)	Elateridae	Coleoptera	Insecta	E	A_END	H	1	0	0	0	0	1	1
TER-BF-T-03_PT-TU-S17	NFF Biscoito da Ferraria	Pico Alto	TER-BF-T-03	26S	481809	4289747	PhD Clara	2003	August	Turquin	PT-TU-S17	244	Alestrus dolosus (Crotch)	Alestrus	dolosus		(Crotch, 1867)	Elateridae	Coleoptera	Insecta	E	A_END	H	4	0	0	0	0	4	4
TER-BF-T-03_PT-TU-S07	NFF Biscoito da Ferraria	Pico Alto	TER-BF-T-03	26S	481809	4289747	PhD Clara	2003	August	Turquin	PT-TU-S07	244	Alestrus dolosus (Crotch)	Alestrus	dolosus		(Crotch, 1867)	Elateridae	Coleoptera	Insecta	E	A_END	H	5	0	0	0	0	5	5
TER-BF-T-03_PT-TU-S05	NFF Biscoito da Ferraria	Pico Alto	TER-BF-T-03	26S	481809	4289747	PhD Clara	2003	August	Turquin	PT-TU-S05	244	Alestrus dolosus (Crotch)	Alestrus	dolosus		(Crotch, 1867)	Elateridae	Coleoptera	Insecta	E	A_END	H	1	0	0	0	0	1	1
TER-BF-T-03_PT-TU-S11	NFF Biscoito da Ferraria	Pico Alto	TER-BF-T-03	26S	481809	4289747	PhD Clara	2003	August	Turquin	PT-TU-S11	244	Alestrus dolosus (Crotch)	Alestrus	dolosus		(Crotch, 1867)	Elateridae	Coleoptera	Insecta	E	A_END	H	1	0	0	0	0	1	1
TER-BF-T-03_PT-TU-S09	NFF Biscoito da Ferraria	Pico Alto	TER-BF-T-03	26S	481809	4289747	PhD Clara	2003	August	Turquin	PT-TU-S09	244	Alestrus dolosus (Crotch)	Alestrus	dolosus		(Crotch, 1867)	Elateridae	Coleoptera	Insecta	E	A_END	H	2	0	0	0	0	2	2
TER-BF-T-38_PT-TU-S03	NFF Biscoito da Ferraria	Labaçal erical	TER-BF-T-38	26S	480778	4290662	PhD Clara	2003	June	Turquin	PT-TU-S03	244	Alestrus dolosus (Crotch)	Alestrus	dolosus		(Crotch, 1867)	Elateridae	Coleoptera	Insecta	E	A_END	H	2	0	0	0	0	2	2
TER-BF-T-38_PT-TU-S07	NFF Biscoito da Ferraria	Labaçal erical	TER-BF-T-38	26S	480778	4290662	PhD Clara	2003	June	Turquin	PT-TU-S07	244	Alestrus dolosus (Crotch)	Alestrus	dolosus		(Crotch, 1867)	Elateridae	Coleoptera	Insecta	E	A_END	H	3	0	0	0	0	3	3
TER-BF-T-38_PT-ET-S12	NFF Biscoito da Ferraria	Labaçal erical	TER-BF-T-38	26S	480778	4290662	PhD Clara	2003	June	Ethylene	PT-ET-S12	244	Alestrus dolosus (Crotch)	Alestrus	dolosus		(Crotch, 1867)	Elateridae	Coleoptera	Insecta	E	A_END	H	2	0	0	0	0	2	2
TER-BF-T-38_PT-ET-S04	NFF Biscoito da Ferraria	Labaçal erical	TER-BF-T-38	26S	480778	4290662	PhD Clara	2003	June	Ethylene	PT-ET-S04	244	Alestrus dolosus (Crotch)	Alestrus	dolosus		(Crotch, 1867)	Elateridae	Coleoptera	Insecta	E	A_END	H	2	0	0	0	0	2	2
TER-BF-T-38_PT-TU-S25	NFF Biscoito da Ferraria	Labaçal erical	TER-BF-T-38	26S	480778	4290662	PhD Clara	2003	June	Turquin	PT-TU-S25	244	Alestrus dolosus (Crotch)	Alestrus	dolosus		(Crotch, 1867)	Elateridae	Coleoptera	Insecta	E	A_END	H	3	0	0	0	0	3	3
TER-BF-T-38_PT-TU-S15	NFF Biscoito da Ferraria	Labaçal erical	TER-BF-T-38	26S	480778	4290662	PhD Clara	2003	June	Turquin	PT-TU-S15	244	Alestrus dolosus (Crotch)	Alestrus	dolosus		(Crotch, 1867)	Elateridae	Coleoptera	Insecta	E	A_END	H	5	0	0	0	0	5	5
TER-BF-T-38_PT-TU-S11	NFF Biscoito da Ferraria	Labaçal erical	TER-BF-T-38	26S	480778	4290662	PhD Clara	2003	June	Turquin	PT-TU-S11	244	Alestrus dolosus (Crotch)	Alestrus	dolosus		(Crotch, 1867)	Elateridae	Coleoptera	Insecta	E	A_END	H	13	0	0	0	0	13	13
TER-BF-T-38_PT-TU-S23	NFF Biscoito da Ferraria	Labaçal erical	TER-BF-T-38	26S	480778	4290662	PhD Clara	2003	June	Turquin	PT-TU-S23	244	Alestrus dolosus (Crotch)	Alestrus	dolosus		(Crotch, 1867)	Elateridae	Coleoptera	Insecta	E	A_END	H	1	0	0	0	0	1	1
TER-BF-T-38_PT-TU-S05	NFF Biscoito da Ferraria	Labaçal erical	TER-BF-T-38	26S	480778	4290662	PhD Clara	2003	June	Turquin	PT-TU-S05	244	Alestrus dolosus (Crotch)	Alestrus	dolosus		(Crotch, 1867)	Elateridae	Coleoptera	Insecta	E	A_END	H	3	0	0	0	0	3	3
TER-BF-T-38_PT-TU-S09	NFF Biscoito da Ferraria	Labaçal erical	TER-BF-T-38	26S	480778	4290662	PhD Clara	2003	June	Turquin	PT-TU-S09	244	Alestrus dolosus (Crotch)	Alestrus	dolosus		(Crotch, 1867)	Elateridae	Coleoptera	Insecta	E	A_END	H	5	0	0	0	0	5	5
TER-BF-T-38_PT-ET-S08	NFF Biscoito da Ferraria	Labaçal erical	TER-BF-T-38	26S	480778	4290662	PhD Clara	2003	June	Ethylene	PT-ET-S08	244	Alestrus dolosus (Crotch)	Alestrus	dolosus		(Crotch, 1867)	Elateridae	Coleoptera	Insecta	E	A_END	H	2	0	0	0	0	2	2
TER-BF-TY01_PT-ET-S04	NFF Biscoito da Ferraria	Labaçal T2 Clara	TER-BF-TY01	26S	480849	4290312	PhD Clara	2003	June	Ethylene	PT-ET-S04	244	Alestrus dolosus (Crotch)	Alestrus	dolosus		(Crotch, 1867)	Elateridae	Coleoptera	Insecta	E	A_END	H	0	2	0	0	0	2	2
TER-BF-TY01_PT-TU-S17	NFF Biscoito da Ferraria	Labaçal T2 Clara	TER-BF-TY01	26S	480849	4290312	PhD Clara	2003	June	Turquin	PT-TU-S17	244	Alestrus dolosus (Crotch)	Alestrus	dolosus		(Crotch, 1867)	Elateridae	Coleoptera	Insecta	E	A_END	H	0	4	0	0	0	4	4
TER-BF-TY01_PT-TU-S15	NFF Biscoito da Ferraria	Labaçal T2 Clara	TER-BF-TY01	26S	480849	4290312	PhD Clara	2003	June	Turquin	PT-TU-S15	244	Alestrus dolosus (Crotch)	Alestrus	dolosus		(Crotch, 1867)	Elateridae	Coleoptera	Insecta	E	A_END	H	0	1	0	0	0	1	1
TER-BF-TY01_PT-ET-S16	NFF Biscoito da Ferraria	Labaçal T2 Clara	TER-BF-TY01	26S	480849	4290312	PhD Clara	2003	June	Ethylene	PT-ET-S16	244	Alestrus dolosus (Crotch)	Alestrus	dolosus		(Crotch, 1867)	Elateridae	Coleoptera	Insecta	E	A_END	H	0	3	0	0	0	3	3
TER-BF-TY01_PT-TU-S23	NFF Biscoito da Ferraria	Labaçal T2 Clara	TER-BF-TY01	26S	480849	4290312	PhD Clara	2003	June	Turquin	PT-TU-S23	244	Alestrus dolosus (Crotch)	Alestrus	dolosus		(Crotch, 1867)	Elateridae	Coleoptera	Insecta	E	A_END	H	0	1	0	0	0	1	1
TER-BF-TY01_PT-ET-S14	NFF Biscoito da Ferraria	Labaçal T2 Clara	TER-BF-TY01	26S	480849	4290312	PhD Clara	2003	June	Ethylene	PT-ET-S14	244	Alestrus dolosus (Crotch)	Alestrus	dolosus		(Crotch, 1867)	Elateridae	Coleoptera	Insecta	E	A_END	H	0	1	0	0	0	1	1
TER-BF-TY01_PT-ET-S12	NFF Biscoito da Ferraria	Labaçal T2 Clara	TER-BF-TY01	26S	480849	4290312	PhD Clara	2003	June	Ethylene	PT-ET-S12	244	Alestrus dolosus (Crotch)	Alestrus	dolosus		(Crotch, 1867)	Elateridae	Coleoptera	Insecta	E	A_END	H	0	1	0	0	0	1	1
TER-BF-TY01_PT-ET-S20	NFF Biscoito da Ferraria	Labaçal T2 Clara	TER-BF-TY01	26S	480849	4290312	PhD Clara	2003	June	Ethylene	PT-ET-S20	244	Alestrus dolosus (Crotch)	Alestrus	dolosus		(Crotch, 1867)	Elateridae	Coleoptera	Insecta	E	A_END	H	0	2	0	0	0	2	2
TER-BF-TY01_PT-ET-S18	NFF Biscoito da Ferraria	Labaçal T2 Clara	TER-BF-TY01	26S	480849	4290312	PhD Clara	2003	June	Ethylene	PT-ET-S18	244	Alestrus dolosus (Crotch)	Alestrus	dolosus		(Crotch, 1867)	Elateridae	Coleoptera	Insecta	E	A_END	H	0	5	0	0	0	5	5
TER-PG-T-33_PT-TU-S01	NFF Pico Galhardo	Pico X B	TER-PG-T-33	26S	480249	4287288	BALA2	2010	June	Turquin	PT-TU-S01	244	Alestrus dolosus (Crotch)	Alestrus	dolosus		(Crotch, 1867)	Elateridae	Coleoptera	Insecta	E	A_END	H	1	0	0	0	0	1	1
TER-PG-T-40_PT-TU-S05	NFF Pico Galhardo	Pico X C	TER-PG-T-40	26S	480133	4287199	PhD Clara	2003	June	Turquin	PT-TU-S05	244	Alestrus dolosus (Crotch)	Alestrus	dolosus		(Crotch, 1867)	Elateridae	Coleoptera	Insecta	E	A_END	H	1	0	0	0	0	1	1
TER-PG-T-40_PT-TU-S03	NFF Pico Galhardo	Pico X C	TER-PG-T-40	26S	480133	4287199	PhD Clara	2003	June	Turquin	PT-TU-S03	244	Alestrus dolosus (Crotch)	Alestrus	dolosus		(Crotch, 1867)	Elateridae	Coleoptera	Insecta	E	A_END	H	1	0	0	0	0	1	1
TER-PG-T-44_PT-ET-S16	NFF Pico Galhardo	Pico X D	TER-PG-T-44	26S	480217	4287486	PhD Clara	2003	July	Ethylene	PT-ET-S16	244	Alestrus dolosus (Crotch)	Alestrus	dolosus		(Crotch, 1867)	Elateridae	Coleoptera	Insecta	E	A_END	H	1	0	0	0	0	1	1
TER-PG-T-44_PT-TU-S07	NFF Pico Galhardo	Pico X D	TER-PG-T-44	26S	480217	4287486	PhD Clara	2003	July	Turquin	PT-TU-S07	244	Alestrus dolosus (Crotch)	Alestrus	dolosus		(Crotch, 1867)	Elateridae	Coleoptera	Insecta	E	A_END	H	1	0	0	0	0	1	1
TER-PG-T-44_PT-TU-S03	NFF Pico Galhardo	Pico X D	TER-PG-T-44	26S	480217	4287486	PhD Clara	2003	July	Turquin	PT-TU-S03	244	Alestrus dolosus (Crotch)	Alestrus	dolosus		(Crotch, 1867)	Elateridae	Coleoptera	Insecta	E	A_END	H	1	0	0	0	0	1	1
TER-SB-T-05_PT-TU-S11	NFF Serra Sta. Bárbara	Tanque	TER-SB-T-05	26S	471646	4286413	BALA	1999	June	Turquin	PT-TU-S11	244	Alestrus dolosus (Crotch)	Alestrus	dolosus		(Crotch, 1867)	Elateridae	Coleoptera	Insecta	E	A_END	H	2	0	0	0	0	2	2
TER-SB-T-47_PT-ET-S04	NFF Serra Sta. Bárbara	Caldeira B	TER-SB-T-47	26S	472890	4287587	PhD Clara	2003	August	Ethylene	PT-ET-S04	244	Alestrus dolosus (Crotch)	Alestrus	dolosus		(Crotch, 1867)	Elateridae	Coleoptera	Insecta	E	A_END	H	1	0	0	0	0	1	1
TER-SB-T-47_PT-TU-S27	NFF Serra Sta. Bárbara	Caldeira B	TER-SB-T-47	26S	472890	4287587	PhD Clara	2003	August	Turquin	PT-TU-S27	244	Alestrus dolosus (Crotch)	Alestrus	dolosus		(Crotch, 1867)	Elateridae	Coleoptera	Insecta	E	A_END	H	1	0	0	0	0	1	1
TER-SB-TE49_PT-ET-S36	NFF Serra Sta. Bárbara	Pinheiro B	TER-SB-TE49	26S	472292	428880	PhD Clara	2003	July	Ethylene	PT-ET-S36	244	Alestrus dolosus (Crotch)	Alestrus	dolosus		(Crotch, 1867)	Elateridae	Coleoptera	Insecta	E	A_END	H	1	0	0	0	0	1	1
TER-SB-TE49_PT-TU-S43	NFF Serra Sta. Bárbara	Pinheiro B	TER-SB-TE49	26S	472292	428880	PhD Clara	2003	July	Turquin	PT-TU-S43	244	Alestrus dolosus (Crotch)	Alestrus	dolosus		(Crotch, 1867)	Elateridae	Coleoptera	Insecta	E	A_END	H	1	0	0	0	0	1	1
TER-TB-T-18_PT-TU-S21	NFF Terra Brava	Terra Brava B	TER-TB-T-18	26S	482792	4287094	BALA2	2010	August	Turquin	PT-TU-S21	244	Alestrus dolosus (Crotch)	Alestrus	dolosus		(Crotch, 1867)	Elateridae	Coleoptera	Insecta	E	A_END	H	2	0	0	0	0	2	2
TER-TB-T-18_PT-TU-S29	NFF Terra Brava	Terra Brava B	TER-TB-T-18	26S	482792	4287094	BALA2	2010	August	Turquin	PT-TU-S29	244	Alestrus dolosus (Crotch)	Alestrus	dolosus		(Crotch, 1867)	Elateridae	Coleoptera	Insecta	E	A_END	H	1	0	0	0	0	1	1
TER-TB-T-18_PT-TU-S27	NFF Terra Brava	Terra Brava B	TER-TB-T-18	26S	482792	4287094	BALA2	2010	August	Turquin	PT-TU-S27	244	Alestrus dolosus (Crotch)	Alestrus	dolosus		(Crotch, 1867)	Elateridae	Coleoptera	Insecta	E	A_END	H	1	0	0	0	0	1	1
TER-TB-T-18_PT-TU-S15	NFF Terra Brava	Terra Brava B	TER-TB-T-18	26S	482792	4287094	Geotermia1	2002	June	Turquin	PT-TU-S15	244	Alestrus dolosus (Crotch)	Alestrus	dolosus		(Crotch, 1867)	Elateridae	Coleoptera	Insecta	E	A_END	H	1	0	0	0	0	1	1
TER-TB-T-18_PT-TU-S17	NFF Terra Brava	Terra Brava B	TER-TB-T-18	26S	482792	4287094	Geotermia1	2002	June	Turquin	PT-TU-S17	244	Alestrus dolosus (Crotch)	Alestrus	dolosus		(Crotch, 1867)	Elateridae	Coleoptera	Insecta	E	A_END	H	1	0	0	0	0	1	1
TER-TB-T-18_PT-TU-S27	NFF Terra Brava	Terra Brava B	TER-TB-T-18	26S	482792	4287094	Geotermia1	2002	June	Turquin	PT-TU-S27	244	Alestrus dolosus (Crotch)	Alestrus	dolosus		(Crotch, 1867)	Elateridae	Coleoptera	Insecta	E	A_END	H	1	0	0	0	0	1	1
TER-TB-T-18_PT-TU-S29	NFF Terra Brava	Terra Brava B	TER-TB-T-18	26S	482792	4287094	Geotermia1	2002	June	Turquin	PT-TU-S29	244	Alestrus dolosus (Crotch)	Alestrus	dolosus		(Crotch, 1867)	Elateridae	Coleoptera	Insecta	E	A_END	H	1	0	0	0	0	1	1
TER-TB-T-18_PT-ET-S16	NFF Terra Brava	Terra Brava B	TER-TB-T-18	26S	482792	4287094	Geotermia1	2002	June	Ethylene	PT-ET-S16	244	Alestrus dolosus (Crotch)	Alestrus	dolosus		(Crotch, 1867)	Elateridae	Coleoptera	Insecta	E	A_END	H	1	0	0	0	0	1	1
SJG-TO-T-06_PT-TU-S15	NFF Topo	Mata Estado C	SJG-TO-T-06	26S	422089	4271756	BALA2	2010	September	Turquin	PT-TU-S15	730	Altella lucida (Simon)	Altella	lucida		(Simon, 1874)	Dictynidae	Araneae	Arachnida	I		P	0	1	0	0	0	1	1
TER-BF-T-01_PT-TU-S05	NFF Biscoito da Ferraria	Labaçal T2 Clara	TER-BF-T-01	26S	480849	4290312	BALA	1999	June	Turquin	PT-TU-S05	161	Amara aenea (De Geer)	Amara	aenea		(De Geer, 1774)	Carabidae	Coleoptera	Insecta	I		P	0	0	1	0	0	1	1
TER-SB-T-11_B-JU-S06	NFF Serra Sta. Bárbara	Caldeira A	TER-SB-T-11	26S	472028	4288949	BALA2	2010	September	Juniperus	B-JU-S06	161	Amara aenea (De Geer)	Amara	aenea		(De Geer, 1774)	Carabidae	Coleoptera	Insecta	I		P	1	0	0	0	0	1	1
FLO-FR-T-06_B-JU-S02	NFF Caldeiras Funda e Rasa	Juniperal	FLO-FR-T-06	25S	136738	4370215	BALA	1999	July	Juniperus	B-JU-S02	616	Amphorophora rubi (Kaltenbach) sensu latiore	Amphorophora	rubi		(Kaltenbach, 1843)	Aphididae	Hemiptera	Insecta	N		H	1	0	0	0	0	1	1
FAI-CF-T-08_B-VA-S05	NFF Caldeira do Faial	Fora trilho Caldeira	FAI-CF-T-08	26S	350801	4271693	PhD Clara	2004	July	Vaccinium	B-VA-S05	78	Anaspis proteus (Wollaston)	Anaspis	proteus		Wollaston, 1854	Scraptiidae	Coleoptera	Insecta	N	Mac	H	1	0	0	0	0	1	1
FAI-CF-T-08_B-JU-S05	NFF Caldeira do Faial	Fora trilho Caldeira	FAI-CF-T-08	26S	350801	4271693	PhD Clara	2004	July	Juniperus	B-JU-S05	78	Anaspis proteus (Wollaston)	Anaspis	proteus		Wollaston, 1854	Scraptiidae	Coleoptera	Insecta	N	Mac	H	4	0	0	0	0	4	4
FAI-CF-T-08_B-JU-S03	NFF Caldeira do Faial	Fora trilho Caldeira	FAI-CF-T-08	26S	350801	4271693	PhD Clara	2004	July	Juniperus	B-JU-S03	78	Anaspis proteus (Wollaston)	Anaspis	proteus		Wollaston, 1854	Scraptiidae	Coleoptera	Insecta	N	Mac	H	1	0	0	0	0	1	1
FAI-CF-T-10_B-JU-S03	NFF Caldeira do Faial	Trilho Caldeira inferior	FAI-CF-T-10	26S	351110	4271917	PhD Clara	2004	July	Juniperus	B-JU-S03	78	Anaspis proteus (Wollaston)	Anaspis	proteus		Wollaston, 1854	Scraptiidae	Coleoptera	Insecta	N	Mac	H	4	0	0	0	0	4	4
FAI-CF-T-11_B-ER-S03	NFF Caldeira do Faial	Fundo Caldeira	FAI-CF-T-11	26S	350857	4272272	PhD Clara	2004	July	Erica	B-ER-S03	78	Anaspis proteus (Wollaston)	Anaspis	proteus		Wollaston, 1854	Scraptiidae	Coleoptera	Insecta	N	Mac	H	1	0	0	0	0	1	1
FLO-FR-T-06_PT-TU-S13	NFF Caldeiras Funda e Rasa	Juniperal	FLO-FR-T-06	25S	136738	4370215	BALA	1999	July	Turquin	PT-TU-S13	78	Anaspis proteus (Wollaston)	Anaspis	proteus		Wollaston, 1854	Scraptiidae	Coleoptera	Insecta	N	Mac	H	1	0	0	0	0	1	1
FLO-FR-T-06_B-JU-S03	NFF Caldeiras Funda e Rasa	Juniperal	FLO-FR-T-06	25S	136738	4370215	BALA2	2010	July	Juniperus	B-JU-S03	78	Anaspis proteus (Wollaston)	Anaspis	proteus		Wollaston, 1854	Scraptiidae	Coleoptera	Insecta	N	Mac	H	1	0	0	0	0	1	1
FLO-FR-T-07_B-IL-S01	NFF Caldeiras Funda e Rasa	Encosta Caldeira Funda	FLO-FR-T-07	25S	136817	4370019	BALA	1999	July	Ilex	B-IL-S01	78	Anaspis proteus (Wollaston)	Anaspis	proteus		Wollaston, 1854	Scraptiidae	Coleoptera	Insecta	N	Mac	H	1	0	0	0	0	1	1
FLO-FR-T-07_B-IL-S02	NFF Caldeiras Funda e Rasa	Encosta Caldeira Funda	FLO-FR-T-07	25S	136817	4370019	BALA	1999	July	Ilex	B-IL-S02	78	Anaspis proteus (Wollaston)	Anaspis	proteus		Wollaston, 1854	Scraptiidae	Coleoptera	Insecta	N	Mac	H	1	0	0	0	0	1	1
FLO-FR-T-07_B-JU-S02	NFF Caldeiras Funda e Rasa	Encosta Caldeira Funda	FLO-FR-T-07	25S	136817	4370019	BALA	1999	July	Juniperus	B-JU-S02	78	Anaspis proteus (Wollaston)	Anaspis	proteus		Wollaston, 1854	Scraptiidae	Coleoptera	Insecta	N	Mac	H	1	0	0	0	0	1	1
FLO-FR-T-07_B-VA-S07	NFF Caldeiras Funda e Rasa	Encosta Caldeira Funda	FLO-FR-T-07	25S	136817	4370019	BALA	1999	July	Vaccinium	B-VA-S07	78	Anaspis proteus (Wollaston)	Anaspis	proteus		Wollaston, 1854	Scraptiidae	Coleoptera	Insecta	N	Mac	H	1	0	0	0	0	1	1
FLO-FR-T-07_PT-ET-S16	NFF Caldeiras Funda e Rasa	Encosta Caldeira Funda	FLO-FR-T-07	25S	136817	4370019	BALA	1999	July	Ethylene	PT-ET-S16	78	Anaspis proteus (Wollaston)	Anaspis	proteus		Wollaston, 1854	Scraptiidae	Coleoptera	Insecta	N	Mac	H	1	0	0	0	0	1	1
FLO-MA-T-04_B-MS-S03	NFF Morro Alto e Pico da Sé	Ribeira da Fazenda	FLO-MA-T-04	25S	138309	4377246	BALA	1999	July	Myrsine	B-MS-S03	78	Anaspis proteus (Wollaston)	Anaspis	proteus		Wollaston, 1854	Scraptiidae	Coleoptera	Insecta	N	Mac	H	1	0	0	0	0	1	1
FLO-MA-T-04_PT-TU-S13	NFF Morro Alto e Pico da Sé	Ribeira da Fazenda	FLO-MA-T-04	25S	138309	4377246	BALA	1999	July	Turquin	PT-TU-S13	78	Anaspis proteus (Wollaston)	Anaspis	proteus		Wollaston, 1854	Scraptiidae	Coleoptera	Insecta	N	Mac	H	1	0	0	0	0	1	1
FLO-MA-T-08_B-CA-S01	NFF Morro Alto e Pico da Sé	Morro Alto Este	FLO-MA-T-08	25S	137809	4376293	BALA2	2010	July	Calluna	B-CA-S01	78	Anaspis proteus (Wollaston)	Anaspis	proteus		Wollaston, 1854	Scraptiidae	Coleoptera	Insecta	N	Mac	H	1	0	0	0	0	1	1
FLO-MA-T-08_B-JU-S04	NFF Morro Alto e Pico da Sé	Morro Alto Este	FLO-MA-T-08	25S	137809	4376293	BALA2	2010	July	Juniperus	B-JU-S04	78	Anaspis proteus (Wollaston)	Anaspis	proteus		Wollaston, 1854	Scraptiidae	Coleoptera	Insecta	N	Mac	H	1	0	0	0	0	1	1
FLO-MA-T-08_B-VA-S05	NFF Morro Alto e Pico da Sé	Morro Alto Este	FLO-MA-T-08	25S	137809	4376293	BALA2	2010	July	Vaccinium	B-VA-S05	78	Anaspis proteus (Wollaston)	Anaspis	proteus		Wollaston, 1854	Scraptiidae	Coleoptera	Insecta	N	Mac	H	1	0	0	0	0	1	1
FLO-MA-T-08_B-VA-S08	NFF Morro Alto e Pico da Sé	Morro Alto Este	FLO-MA-T-08	25S	137809	4376293	BALA2	2010	July	Vaccinium	B-VA-S08	78	Anaspis proteus (Wollaston)	Anaspis	proteus		Wollaston, 1854	Scraptiidae	Coleoptera	Insecta	N	Mac	H	8	0	0	0	0	8	8
PIC-CA-T-21_B-JU-S02	NFF Caveiro	Caveiro morro	PIC-CA-T-21	26S	394055	4255376	BALA	2000	July	Juniperus	B-JU-S02	78	Anaspis proteus (Wollaston)	Anaspis	proteus		Wollaston, 1854	Scraptiidae	Coleoptera	Insecta	N	Mac	H	1	0	0	0	0	1	1
PIC-CA-T-21_B-JU-S03	NFF Caveiro	Caveiro morro	PIC-CA-T-21	26S	394055	4255376	BALA	2000	July	Juniperus	B-JU-S03	78	Anaspis proteus (Wollaston)	Anaspis	proteus		Wollaston, 1854	Scraptiidae	Coleoptera	Insecta	N	Mac	H	4	0	0	0	0	4	4
PIC-CA-T-21_B-JU-S07	NFF Caveiro	Caveiro morro	PIC-CA-T-21	26S	394055	4255376	BALA	2000	July	Juniperus	B-JU-S07	78	Anaspis proteus (Wollaston)	Anaspis	proteus		Wollaston, 1854	Scraptiidae	Coleoptera	Insecta	N	Mac	H	1	0	0	0	0	1	1
PIC-CA-T-21_B-LA-S05	NFF Caveiro	Caveiro morro	PIC-CA-T-21	26S	394055	4255376	BALA	2000	July	Laurus	B-LA-S05	78	Anaspis proteus (Wollaston)	Anaspis	proteus		Wollaston, 1854	Scraptiidae	Coleoptera	Insecta	N	Mac	H	1	0	0	0	0	1	1
PIC-LC-T-16_B-JU-S06	NFF Lagoa do Caiado	Frente Lagoa	PIC-LC-T-16	26S	390537	4257057	BALA	2000	July	Juniperus	B-JU-S06	78	Anaspis proteus (Wollaston)	Anaspis	proteus		Wollaston, 1854	Scraptiidae	Coleoptera	Insecta	N	Mac	H	1	0	0	0	0	1	1
PIC-LC-T-17_B-JU-S01	NFF Lagoa do Caiado	Frente Euphorbia	PIC-LC-T-17	26S	390661	4257058	BALA	2000	July	Juniperus	B-JU-S01	78	Anaspis proteus (Wollaston)	Anaspis	proteus		Wollaston, 1854	Scraptiidae	Coleoptera	Insecta	N	Mac	H	1	0	0	0	0	1	1
PIC-LC-T-17_B-ER-S02	NFF Lagoa do Caiado	Frente Euphorbia	PIC-LC-T-17	26S	390661	4257058	BALA	2000	July	Erica	B-ER-S02	78	Anaspis proteus (Wollaston)	Anaspis	proteus		Wollaston, 1854	Scraptiidae	Coleoptera	Insecta	N	Mac	H	15	0	0	0	0	15	15
PIC-LC-T-17_B-ER-S05	NFF Lagoa do Caiado	Frente Euphorbia	PIC-LC-T-17	26S	390661	4257058	BALA	2000	July	Erica	B-ER-S05	78	Anaspis proteus (Wollaston)	Anaspis	proteus		Wollaston, 1854	Scraptiidae	Coleoptera	Insecta	N	Mac	H	16	0	0	0	0	16	16
PIC-LC-T-17_B-ER-S06	NFF Lagoa do Caiado	Frente Euphorbia	PIC-LC-T-17	26S	390661	4257058	BALA	2000	July	Erica	B-ER-S06	78	Anaspis proteus (Wollaston)	Anaspis	proteus		Wollaston, 1854	Scraptiidae	Coleoptera	Insecta	N	Mac	H	20	0	0	0	0	20	20
PIC-LC-T-17_B-ER-S07	NFF Lagoa do Caiado	Frente Euphorbia	PIC-LC-T-17	26S	390661	4257058	BALA	2000	July	Erica	B-ER-S07	78	Anaspis proteus (Wollaston)	Anaspis	proteus		Wollaston, 1854	Scraptiidae	Coleoptera	Insecta	N	Mac	H	5	0	0	0	0	5	5
PIC-LC-T-17_B-ER-S09	NFF Lagoa do Caiado	Frente Euphorbia	PIC-LC-T-17	26S	390661	4257058	BALA	2000	July	Erica	B-ER-S09	78	Anaspis proteus (Wollaston)	Anaspis	proteus		Wollaston, 1854	Scraptiidae	Coleoptera	Insecta	N	Mac	H	5	0	0	0	0	5	5
PIC-LC-T-17_B-MS-S02	NFF Lagoa do Caiado	Frente Euphorbia	PIC-LC-T-17	26S	390661	4257058	BALA	2000	July	Myrsine	B-MS-S02	78	Anaspis proteus (Wollaston)	Anaspis	proteus		Wollaston, 1854	Scraptiidae	Coleoptera	Insecta	N	Mac	H	4	0	0	0	0	4	4
PIC-LC-T-17_B-MS-S03	NFF Lagoa do Caiado	Frente Euphorbia	PIC-LC-T-17	26S	390661	4257058	BALA	2000	July	Myrsine	B-MS-S03	78	Anaspis proteus (Wollaston)	Anaspis	proteus		Wollaston, 1854	Scraptiidae	Coleoptera	Insecta	N	Mac	H	1	0	0	0	0	1	1
PIC-LC-T-17_B-MS-S04	NFF Lagoa do Caiado	Frente Euphorbia	PIC-LC-T-17	26S	390661	4257058	BALA	2000	July	Myrsine	B-MS-S04	78	Anaspis proteus (Wollaston)	Anaspis	proteus		Wollaston, 1854	Scraptiidae	Coleoptera	Insecta	N	Mac	H	1	0	0	0	0	1	1
PIC-LC-T-17_B-MS-S05	NFF Lagoa do Caiado	Frente Euphorbia	PIC-LC-T-17	26S	390661	4257058	BALA	2000	July	Myrsine	B-MS-S05	78	Anaspis proteus (Wollaston)	Anaspis	proteus		Wollaston, 1854	Scraptiidae	Coleoptera	Insecta	N	Mac	H	1	0	0	0	0	1	1
PIC-LC-T-17_B-MS-S07	NFF Lagoa do Caiado	Frente Euphorbia	PIC-LC-T-17	26S	390661	4257058	BALA	2000	July	Myrsine	B-MS-S07	78	Anaspis proteus (Wollaston)	Anaspis	proteus		Wollaston, 1854	Scraptiidae	Coleoptera	Insecta	N	Mac	H	1	0	0	0	0	1	1
PIC-MP-T-01_B-LA-S08	NFF Mistério da Prainha	Chão Verde superior	PIC-MP-T-01	26S	388838	4259774	BALA2	2010	July	Laurus	B-LA-S08	78	Anaspis proteus (Wollaston)	Anaspis	proteus		Wollaston, 1854	Scraptiidae	Coleoptera	Insecta	N	Mac	H	0	1	0	0	0	1	1
PIC-MP-T-14_B-IL-S09	NFF Mistério da Prainha	Chão Verde inferior cima	PIC-MP-T-14	26S	389041	4260364	BALA	2000	July	Ilex	B-IL-S09	78	Anaspis proteus (Wollaston)	Anaspis	proteus		Wollaston, 1854	Scraptiidae	Coleoptera	Insecta	N	Mac	H	5	0	0	0	0	5	5
PIC-MP-T-14_B-ER-S08	NFF Mistério da Prainha	Chão Verde inferior cima	PIC-MP-T-14	26S	389041	4260364	BALA	2000	July	Erica	B-ER-S08	78	Anaspis proteus (Wollaston)	Anaspis	proteus		Wollaston, 1854	Scraptiidae	Coleoptera	Insecta	N	Mac	H	1	0	0	0	0	1	1
PIC-MP-T-15_B-JU-S01	NFF Mistério da Prainha	Chão Verde superior perpendicular	PIC-MP-T-15	26S	389035	4259508	BALA	2000	July	Juniperus	B-JU-S01	78	Anaspis proteus (Wollaston)	Anaspis	proteus		Wollaston, 1854	Scraptiidae	Coleoptera	Insecta	N	Mac	H	1	0	0	0	0	1	1
PIC-MP-T-15_B-JU-S06	NFF Mistério da Prainha	Chão Verde superior perpendicular	PIC-MP-T-15	26S	389035	4259508	BALA	2000	July	Juniperus	B-JU-S06	78	Anaspis proteus (Wollaston)	Anaspis	proteus		Wollaston, 1854	Scraptiidae	Coleoptera	Insecta	N	Mac	H	1	0	0	0	0	1	1
PIC-MP-T-18_B-IL-S07	NFF Mistério da Prainha	Mistério plateau dir	PIC-MP-T-18	26S	388485	4257668	BALA	2000	July	Ilex	B-IL-S07	78	Anaspis proteus (Wollaston)	Anaspis	proteus		Wollaston, 1854	Scraptiidae	Coleoptera	Insecta	N	Mac	H	9	0	0	0	0	9	9
PIC-MP-T-19_B-JU-S09	NFF Mistério da Prainha	Mistério plateau terminal	PIC-MP-T-19	26S	389130	4258082	BALA	2000	July	Juniperus	B-JU-S09	78	Anaspis proteus (Wollaston)	Anaspis	proteus		Wollaston, 1854	Scraptiidae	Coleoptera	Insecta	N	Mac	H	1	0	0	0	0	1	1
SJG-PP-T-13_B-PT-S02	NFF Pico Pinheiro	Pico Pinheiro inferior	SJG-PP-T-13	26S	409256	4278677	PhD Clara	2004	July	Pittosporum	B-PT-S02	78	Anaspis proteus (Wollaston)	Anaspis	proteus		Wollaston, 1854	Scraptiidae	Coleoptera	Insecta	N	Mac	H	1	0	0	0	0	1	1
SJG-PP-T-13_B-IL-S01	NFF Pico Pinheiro	Pico Pinheiro inferior	SJG-PP-T-13	26S	409256	4278677	PhD Clara	2004	July	Ilex	B-IL-S01	78	Anaspis proteus (Wollaston)	Anaspis	proteus		Wollaston, 1854	Scraptiidae	Coleoptera	Insecta	N	Mac	H	4	0	0	0	0	4	4
SJG-PP-T-14_B-ER-S07	NFF Pico Pinheiro	Pico Pinheiro superior	SJG-PP-T-14	26S	408853	4278139	PhD Clara	2004	July	Erica	B-ER-S07	78	Anaspis proteus (Wollaston)	Anaspis	proteus		Wollaston, 1854	Scraptiidae	Coleoptera	Insecta	N	Mac	H	1	0	0	0	0	1	1
SJG-PP-T-14_B-ER-S05	NFF Pico Pinheiro	Pico Pinheiro superior	SJG-PP-T-14	26S	408853	4278139	PhD Clara	2004	July	Erica	B-ER-S05	78	Anaspis proteus (Wollaston)	Anaspis	proteus		Wollaston, 1854	Scraptiidae	Coleoptera	Insecta	N	Mac	H	1	0	0	0	0	1	1
SJG-TO-T-15_B-VA-S04	NFF Topo	Topo juniperal	SJG-TO-T-15	26S	422255	4271216	PhD Clara	2004	July	Vaccinium	B-VA-S04	78	Anaspis proteus (Wollaston)	Anaspis	proteus		Wollaston, 1854	Scraptiidae	Coleoptera	Insecta	N	Mac	H	1	0	0	0	0	1	1
SJG-TO-T-15_B-VA-S10	NFF Topo	Topo juniperal	SJG-TO-T-15	26S	422255	4271216	PhD Clara	2004	July	Vaccinium	B-VA-S10	78	Anaspis proteus (Wollaston)	Anaspis	proteus		Wollaston, 1854	Scraptiidae	Coleoptera	Insecta	N	Mac	H	1	0	0	0	0	1	1
SJG-TO-T-15_B-ER-S10	NFF Topo	Topo juniperal	SJG-TO-T-15	26S	422255	4271216	PhD Clara	2004	July	Erica	B-ER-S10	78	Anaspis proteus (Wollaston)	Anaspis	proteus		Wollaston, 1854	Scraptiidae	Coleoptera	Insecta	N	Mac	H	2	0	0	0	0	2	2
SJG-TO-T-15_B-ER-S09	NFF Topo	Topo juniperal	SJG-TO-T-15	26S	422255	4271216	PhD Clara	2004	July	Erica	B-ER-S09	78	Anaspis proteus (Wollaston)	Anaspis	proteus		Wollaston, 1854	Scraptiidae	Coleoptera	Insecta	N	Mac	H	2	0	0	0	0	2	2
SMG-AT-T-12_B-LA-S08	NFF Atalhada	Conteiras	SMG-AT-T-12	26S	657009	4188841	PhD Clara	2004	June	Laurus	B-LA-S08	78	Anaspis proteus (Wollaston)	Anaspis	proteus		Wollaston, 1854	Scraptiidae	Coleoptera	Insecta	N	Mac	H	1	0	0	0	0	1	1
SMG-AT-T-13_B-LA-S06	NFF Atalhada	Borda precipício	SMG-AT-T-13	26S	657016	4188637	PhD Clara	2004	June	Laurus	B-LA-S06	78	Anaspis proteus (Wollaston)	Anaspis	proteus		Wollaston, 1854	Scraptiidae	Coleoptera	Insecta	N	Mac	H	1	0	0	0	0	1	1
SMG-AT-T-13_B-LA-S05	NFF Atalhada	Borda precipício	SMG-AT-T-13	26S	657016	4188637	PhD Clara	2004	June	Laurus	B-LA-S05	78	Anaspis proteus (Wollaston)	Anaspis	proteus		Wollaston, 1854	Scraptiidae	Coleoptera	Insecta	N	Mac	H	1	0	0	0	0	1	1
SMG-PV-T-01_B-JU-S01	NFF Pico da Vara	Miradouro Tronqueira	SMG-PV-T-01	26S	659806	4184815	BALA2	2010	june	Juniperus	B-JU-S01	78	Anaspis proteus (Wollaston)	Anaspis	proteus		Wollaston, 1854	Scraptiidae	Coleoptera	Insecta	N	Mac	H	1	0	0	0	0	1	1
SMG-PV-T-01_B-JU-S09	NFF Pico da Vara	Miradouro Tronqueira	SMG-PV-T-01	26S	659806	4184815	BALA2	2010	june	Juniperus	B-JU-S09	78	Anaspis proteus (Wollaston)	Anaspis	proteus		Wollaston, 1854	Scraptiidae	Coleoptera	Insecta	N	Mac	H	1	0	0	0	0	1	1
SMG-PV-T-04_B-IL-S05	NFF Pico da Vara	Miradouro inferior	SMG-PV-T-04	26S	659850	4184997	BALA	1999	August	Ilex	B-IL-S05	78	Anaspis proteus (Wollaston)	Anaspis	proteus		Wollaston, 1854	Scraptiidae	Coleoptera	Insecta	N	Mac	H	1	0	0	0	0	1	1
SMG-PV-T-04_B-ER-S01	NFF Pico da Vara	Miradouro inferior	SMG-PV-T-04	26S	659850	4184997	BALA2	2010	june	Erica	B-ER-S01	78	Anaspis proteus (Wollaston)	Anaspis	proteus		Wollaston, 1854	Scraptiidae	Coleoptera	Insecta	N	Mac	H	1	0	0	0	0	1	1
SMG-PV-T-04_B-IL-S05	NFF Pico da Vara	Miradouro inferior	SMG-PV-T-04	26S	659850	4184997	BALA2	2010	june	Ilex	B-IL-S05	78	Anaspis proteus (Wollaston)	Anaspis	proteus		Wollaston, 1854	Scraptiidae	Coleoptera	Insecta	N	Mac	H	4	0	0	0	0	4	4
SMG-PV-T-04_B-IL-S06	NFF Pico da Vara	Miradouro inferior	SMG-PV-T-04	26S	659850	4184997	BALA2	2010	june	Ilex	B-IL-S06	78	Anaspis proteus (Wollaston)	Anaspis	proteus		Wollaston, 1854	Scraptiidae	Coleoptera	Insecta	N	Mac	H	1	0	0	0	0	1	1
SMG-PV-T-04_B-IL-S10	NFF Pico da Vara	Miradouro inferior	SMG-PV-T-04	26S	659850	4184997	BALA2	2010	june	Ilex	B-IL-S10	78	Anaspis proteus (Wollaston)	Anaspis	proteus		Wollaston, 1854	Scraptiidae	Coleoptera	Insecta	N	Mac	H	1	0	0	2	0	3	1
SMG-PV-T-05_B-CL-S04	NFF Pico da Vara	Tronqueira Rib Guilherme	SMG-PV-T-05	26S	659799	4185142	BALA	2000	July	Clectra	B-CL-S04	78	Anaspis proteus (Wollaston)	Anaspis	proteus		Wollaston, 1854	Scraptiidae	Coleoptera	Insecta	N	Mac	H	1	0	0	0	0	1	1
SMG-PV-T-05_B-ER-S03	NFF Pico da Vara	Tronqueira Rib Guilherme	SMG-PV-T-05	26S	659799	4185142	BALA	2000	July	Erica	B-ER-S03	78	Anaspis proteus (Wollaston)	Anaspis	proteus		Wollaston, 1854	Scraptiidae	Coleoptera	Insecta	N	Mac	H	3	0	0	0	0	3	3
SMG-PV-T-05_B-ER-S05	NFF Pico da Vara	Tronqueira Rib Guilherme	SMG-PV-T-05	26S	659799	4185142	BALA	2000	July	Erica	B-ER-S05	78	Anaspis proteus (Wollaston)	Anaspis	proteus		Wollaston, 1854	Scraptiidae	Coleoptera	Insecta	N	Mac	H	4	0	0	0	0	4	4
SMG-PV-T-05_B-ER-S07	NFF Pico da Vara	Tronqueira Rib Guilherme	SMG-PV-T-05	26S	659799	4185142	BALA	2000	July	Erica	B-ER-S07	78	Anaspis proteus (Wollaston)	Anaspis	proteus		Wollaston, 1854	Scraptiidae	Coleoptera	Insecta	N	Mac	H	1	0	0	0	0	1	1
SMG-PV-T-05_B-ER-S08	NFF Pico da Vara	Tronqueira Rib Guilherme	SMG-PV-T-05	26S	659799	4185142	BALA	2000	July	Erica	B-ER-S08	78	Anaspis proteus (Wollaston)	Anaspis	proteus		Wollaston, 1854	Scraptiidae	Coleoptera	Insecta	N	Mac	H	1	0	0	0	0	1	1
SMG-PV-T-05_B-ER-S09	NFF Pico da Vara	Tronqueira Rib Guilherme	SMG-PV-T-05	26S	659799	4185142	BALA	2000	July	Erica	B-ER-S09	78	Anaspis proteus (Wollaston)	Anaspis	proteus		Wollaston, 1854	Scraptiidae	Coleoptera	Insecta	N	Mac	H	1	0	0	0	0	1	1
SMR-PA-T-02_B-VA-S01	NFF Pico Alto	Pico Alto STM B	SMR-PA-T-02	26S	669823	4094394	BALA	2002	July	Vaccinium	B-VA-S01	78	Anaspis proteus (Wollaston)	Anaspis	proteus		Wollaston, 1854	Scraptiidae	Coleoptera	Insecta	N	Mac	H	1	0	0	0	0	1	1
SMR-PA-TA02_PT-ET-S30	NFF Pico Alto	Pico Alto STM B	SMR-PA-TA02	26S	669823	4094394	Tese Álvaro	1997	June	Ethylene	PT-ET-S30	78	Anaspis proteus (Wollaston)	Anaspis	proteus		Wollaston, 1854	Scraptiidae	Coleoptera	Insecta	N	Mac	H	1	0	0	0	0	1	1
TER-BF-T-01_B-LA-S06	NFF Biscoito da Ferraria	Labaçal T2 Clara	TER-BF-T-01	26S	480849	4290312	BALA	1999	June	Laurus	B-LA-S06	78	Anaspis proteus (Wollaston)	Anaspis	proteus		Wollaston, 1854	Scraptiidae	Coleoptera	Insecta	N	Mac	H	10	0	0	0	0	10	10
TER-BF-T-01_B-IL-S05	NFF Biscoito da Ferraria	Labaçal T2 Clara	TER-BF-T-01	26S	480849	4290312	BALA	1999	June	Ilex	B-IL-S05	78	Anaspis proteus (Wollaston)	Anaspis	proteus		Wollaston, 1854	Scraptiidae	Coleoptera	Insecta	N	Mac	H	1	0	0	0	0	1	1
TER-BF-T-01_B-JU-S06	NFF Biscoito da Ferraria	Labaçal T2 Clara	TER-BF-T-01	26S	480849	4290312	BALA	1999	June	Juniperus	B-JU-S06	78	Anaspis proteus (Wollaston)	Anaspis	proteus		Wollaston, 1854	Scraptiidae	Coleoptera	Insecta	N	Mac	H	2	0	0	0	0	2	2
TER-BF-T-01_B-JU-S05	NFF Biscoito da Ferraria	Labaçal T2 Clara	TER-BF-T-01	26S	480849	4290312	BALA2	2011	June	Juniperus	B-JU-S05	78	Anaspis proteus (Wollaston)	Anaspis	proteus		Wollaston, 1854	Scraptiidae	Coleoptera	Insecta	N	Mac	H	1	0	0	0	0	1	1
TER-BF-T-01_B-JU-S06	NFF Biscoito da Ferraria	Labaçal T2 Clara	TER-BF-T-01	26S	480849	4290312	BALA2	2011	June	Juniperus	B-JU-S06	78	Anaspis proteus (Wollaston)	Anaspis	proteus		Wollaston, 1854	Scraptiidae	Coleoptera	Insecta	N	Mac	H	5	0	0	0	0	5	5
TER-BF-T-02_B-JU-S05	NFF Biscoito da Ferraria	Chambre A T1 Clara	TER-BF-T-02	26S	479370	4289985	BALA2	2011	June	Juniperus	B-JU-S05	78	Anaspis proteus (Wollaston)	Anaspis	proteus		Wollaston, 1854	Scraptiidae	Coleoptera	Insecta	N	Mac	H	1	0	0	0	0	1	1
TER-BF-T-02_B-JU-S06	NFF Biscoito da Ferraria	Chambre A T1 Clara	TER-BF-T-02	26S	479370	4289985	BALA2	2011	June	Juniperus	B-JU-S06	78	Anaspis proteus (Wollaston)	Anaspis	proteus		Wollaston, 1854	Scraptiidae	Coleoptera	Insecta	N	Mac	H	3	0	0	0	0	3	3
TER-BF-T-02_B-JU-S10	NFF Biscoito da Ferraria	Chambre A T1 Clara	TER-BF-T-02	26S	479370	4289985	BALA2	2011	June	Juniperus	B-JU-S10	78	Anaspis proteus (Wollaston)	Anaspis	proteus		Wollaston, 1854	Scraptiidae	Coleoptera	Insecta	N	Mac	H	1	0	0	0	0	1	1
TER-BF-T-02_B-MS-S01	NFF Biscoito da Ferraria	Chambre A T1 Clara	TER-BF-T-02	26S	479370	4289985	BALA2	2011	June	Myrsine	B-MS-S01	78	Anaspis proteus (Wollaston)	Anaspis	proteus		Wollaston, 1854	Scraptiidae	Coleoptera	Insecta	N	Mac	H	1	0	0	0	0	1	1
TER-BF-T-02_B-MS-S02	NFF Biscoito da Ferraria	Chambre A T1 Clara	TER-BF-T-02	26S	479370	4289985	BALA2	2011	June	Myrsine	B-MS-S02	78	Anaspis proteus (Wollaston)	Anaspis	proteus		Wollaston, 1854	Scraptiidae	Coleoptera	Insecta	N	Mac	H	1	0	0	0	0	1	1
TER-BF-T-02_B-MS-S08	NFF Biscoito da Ferraria	Chambre A T1 Clara	TER-BF-T-02	26S	479370	4289985	BALA2	2011	June	Myrsine	B-MS-S08	78	Anaspis proteus (Wollaston)	Anaspis	proteus		Wollaston, 1854	Scraptiidae	Coleoptera	Insecta	N	Mac	H	1	0	0	0	0	1	1
TER-BF-T-02_B-VA-S02	NFF Biscoito da Ferraria	Chambre A T1 Clara	TER-BF-T-02	26S	479370	4289985	BALA2	2011	June	Vaccinium	B-VA-S02	78	Anaspis proteus (Wollaston)	Anaspis	proteus		Wollaston, 1854	Scraptiidae	Coleoptera	Insecta	N	Mac	H	1	0	0	0	0	1	1
TER-BF-T-02_B-VA-S04	NFF Biscoito da Ferraria	Chambre A T1 Clara	TER-BF-T-02	26S	479370	4289985	BALA2	2011	June	Vaccinium	B-VA-S04	78	Anaspis proteus (Wollaston)	Anaspis	proteus		Wollaston, 1854	Scraptiidae	Coleoptera	Insecta	N	Mac	H	1	0	0	0	0	1	1
TER-BF-T-02_B-VA-S05	NFF Biscoito da Ferraria	Chambre A T1 Clara	TER-BF-T-02	26S	479370	4289985	BALA2	2011	June	Vaccinium	B-VA-S05	78	Anaspis proteus (Wollaston)	Anaspis	proteus		Wollaston, 1854	Scraptiidae	Coleoptera	Insecta	N	Mac	H	4	0	0	0	0	4	4
TER-BF-T-02_B-VA-S06	NFF Biscoito da Ferraria	Chambre A T1 Clara	TER-BF-T-02	26S	479370	4289985	BALA2	2011	June	Vaccinium	B-VA-S06	78	Anaspis proteus (Wollaston)	Anaspis	proteus		Wollaston, 1854	Scraptiidae	Coleoptera	Insecta	N	Mac	H	22	0	0	0	0	22	22
TER-BF-T-04_B-JU-S10	NFF Biscoito da Ferraria	Chambre B	TER-BF-T-04	26S	479467	4289620	BALA	2000	September	Juniperus	B-JU-S10	78	Anaspis proteus (Wollaston)	Anaspis	proteus		Wollaston, 1854	Scraptiidae	Coleoptera	Insecta	N	Mac	H	2	0	0	0	0	2	2
TER-BF-T-38_B-CA-S05	NFF Biscoito da Ferraria	Labaçal erical	TER-BF-T-38	26S	480778	4290662	PhD Clara	2003	July	Calluna	B-CA-S05	78	Anaspis proteus (Wollaston)	Anaspis	proteus		Wollaston, 1854	Scraptiidae	Coleoptera	Insecta	N	Mac	H	1	0	0	0	0	1	1
TER-BF-T-38_B-ER-S08	NFF Biscoito da Ferraria	Labaçal erical	TER-BF-T-38	26S	480778	4290662	PhD Clara	2003	July	Erica	B-ER-S08	78	Anaspis proteus (Wollaston)	Anaspis	proteus		Wollaston, 1854	Scraptiidae	Coleoptera	Insecta	N	Mac	H	2	0	0	0	0	2	2
TER-BF-TP39_B-VA-S10	NFF Biscoito da Ferraria	Chambre C	TER-BF-TP39	26S	479995	4289832	PhD Clara	2003	July	Vaccinium	B-VA-S10	78	Anaspis proteus (Wollaston)	Anaspis	proteus		Wollaston, 1854	Scraptiidae	Coleoptera	Insecta	N	Mac	H	1	0	0	0	0	1	1
TER-BF-TP41_B-LA-S04	NFF Biscoito da Ferraria	Pico Alto nascente	TER-BF-TP41	26S	481855	4289438	PhD Clara	2003	July	Laurus	B-LA-S04	78	Anaspis proteus (Wollaston)	Anaspis	proteus		Wollaston, 1854	Scraptiidae	Coleoptera	Insecta	N	Mac	H	4	0	0	0	0	4	4
TER-BF-TP41_B-ER-S05	NFF Biscoito da Ferraria	Pico Alto nascente	TER-BF-TP41	26S	481855	4289438	PhD Clara	2003	July	Erica	B-ER-S05	78	Anaspis proteus (Wollaston)	Anaspis	proteus		Wollaston, 1854	Scraptiidae	Coleoptera	Insecta	N	Mac	H	1	0	0	0	0	1	1
TER-BF-TP41_B-ER-S04	NFF Biscoito da Ferraria	Pico Alto nascente	TER-BF-TP41	26S	481855	4289438	PhD Clara	2003	July	Erica	B-ER-S04	78	Anaspis proteus (Wollaston)	Anaspis	proteus		Wollaston, 1854	Scraptiidae	Coleoptera	Insecta	N	Mac	H	1	0	0	0	0	1	1
TER-BF-TP41_B-IL-S02	NFF Biscoito da Ferraria	Pico Alto nascente	TER-BF-TP41	26S	481855	4289438	PhD Clara	2003	July	Ilex	B-IL-S02	78	Anaspis proteus (Wollaston)	Anaspis	proteus		Wollaston, 1854	Scraptiidae	Coleoptera	Insecta	N	Mac	H	1	0	0	0	0	1	1
TER-BF-TP42_B-VA-S05	NFF Biscoito da Ferraria	Biscoito centro	TER-BF-TP42	26S	480073	4290159	PhD Clara	2003	July	Vaccinium	B-VA-S05	78	Anaspis proteus (Wollaston)	Anaspis	proteus		Wollaston, 1854	Scraptiidae	Coleoptera	Insecta	N	Mac	H	1	0	0	0	0	1	1
TER-BF-TY01_B-ER-S10	NFF Biscoito da Ferraria	Labaçal T2 Clara	TER-BF-TY01	26S	480849	4290312	PhD Clara	2003	June	Erica	B-ER-S10	78	Anaspis proteus (Wollaston)	Anaspis	proteus		Wollaston, 1854	Scraptiidae	Coleoptera	Insecta	N	Mac	H	2	0	0	0	0	2	2
TER-BF-TY01_B-VA-S04	NFF Biscoito da Ferraria	Labaçal T2 Clara	TER-BF-TY01	26S	480849	4290312	PhD Clara	2003	June	Vaccinium	B-VA-S04	78	Anaspis proteus (Wollaston)	Anaspis	proteus		Wollaston, 1854	Scraptiidae	Coleoptera	Insecta	N	Mac	H	2	0	0	0	0	2	2
TER-BF-TY01_B-MS-S04	NFF Biscoito da Ferraria	Labaçal T2 Clara	TER-BF-TY01	26S	480849	4290312	PhD Clara	2003	June	Myrsine	B-MS-S04	78	Anaspis proteus (Wollaston)	Anaspis	proteus		Wollaston, 1854	Scraptiidae	Coleoptera	Insecta	N	Mac	H	1	0	0	0	0	1	1
TER-BF-TY01_B-JU-S03	NFF Biscoito da Ferraria	Labaçal T2 Clara	TER-BF-TY01	26S	480849	4290312	PhD Clara	2003	June	Juniperus	B-JU-S03	78	Anaspis proteus (Wollaston)	Anaspis	proteus		Wollaston, 1854	Scraptiidae	Coleoptera	Insecta	N	Mac	H	1	0	0	0	0	1	1
TER-BF-TY02_B-VA-S08	NFF Biscoito da Ferraria	Chambre A T1 Clara	TER-BF-TY02	26S	479370	4289985	PhD Clara	2003	June	Vaccinium	B-VA-S08	78	Anaspis proteus (Wollaston)	Anaspis	proteus		Wollaston, 1854	Scraptiidae	Coleoptera	Insecta	N	Mac	H	1	0	0	0	0	1	1
TER-BF-TY02_B-JU-S01	NFF Biscoito da Ferraria	Chambre A T1 Clara	TER-BF-TY02	26S	479370	4289985	PhD Clara	2003	June	Juniperus	B-JU-S01	78	Anaspis proteus (Wollaston)	Anaspis	proteus		Wollaston, 1854	Scraptiidae	Coleoptera	Insecta	N	Mac	H	2	0	0	0	0	2	2
TER-BF-TY04_B-VA-S08	NFF Biscoito da Ferraria	Chambre B	TER-BF-TY04	26S	479467	4289620	PhD Clara	2003	July	Vaccinium	B-VA-S08	78	Anaspis proteus (Wollaston)	Anaspis	proteus		Wollaston, 1854	Scraptiidae	Coleoptera	Insecta	N	Mac	H	13	0	0	0	0	13	13
TER-GM-T-23_B-ER-S05	NFF Caldeira Guilherme Moniz	GM touros	TER-GM-T-23	26S	482285	4284477	Geotermia1	2002	July	Erica	B-ER-S05	78	Anaspis proteus (Wollaston)	Anaspis	proteus		Wollaston, 1854	Scraptiidae	Coleoptera	Insecta	N	Mac	H	1	0	0	0	0	1	1
TER-GM-T-23_B-ER-S07	NFF Caldeira Guilherme Moniz	GM touros	TER-GM-T-23	26S	482285	4284477	Geotermia1	2002	July	Erica	B-ER-S07	78	Anaspis proteus (Wollaston)	Anaspis	proteus		Wollaston, 1854	Scraptiidae	Coleoptera	Insecta	N	Mac	H	1	0	0	0	0	1	1
TER-GM-T-23_B-LA-S03	NFF Caldeira Guilherme Moniz	GM touros	TER-GM-T-23	26S	482285	4284477	Geotermia1	2002	July	Laurus	B-LA-S03	78	Anaspis proteus (Wollaston)	Anaspis	proteus		Wollaston, 1854	Scraptiidae	Coleoptera	Insecta	N	Mac	H	3	0	0	0	0	3	3
TER-PG-T-22_B-JU-S08	NFF Pico Galhardo	Pico X A	TER-PG-T-22	26S	479664	4287554	BALA2	2010	June	Juniperus	B-JU-S08	78	Anaspis proteus (Wollaston)	Anaspis	proteus		Wollaston, 1854	Scraptiidae	Coleoptera	Insecta	N	Mac	H	1	0	0	0	0	1	1
TER-PG-T-22_B-JU-S04	NFF Pico Galhardo	Pico X A	TER-PG-T-22	26S	479664	4287554	Geotermia1	2002	July	Juniperus	B-JU-S04	78	Anaspis proteus (Wollaston)	Anaspis	proteus		Wollaston, 1854	Scraptiidae	Coleoptera	Insecta	N	Mac	H	12	0	0	0	0	12	12
TER-PG-T-22_B-VA-S10	NFF Pico Galhardo	Pico X A	TER-PG-T-22	26S	479664	4287554	Geotermia1	2002	July	Vaccinium	B-VA-S10	78	Anaspis proteus (Wollaston)	Anaspis	proteus		Wollaston, 1854	Scraptiidae	Coleoptera	Insecta	N	Mac	H	1	0	0	0	0	1	1
TER-PG-T-33_B-JU-S04	NFF Pico Galhardo	Pico X B	TER-PG-T-33	26S	480249	4287288	BALA2	2010	June	Juniperus	B-JU-S04	78	Anaspis proteus (Wollaston)	Anaspis	proteus		Wollaston, 1854	Scraptiidae	Coleoptera	Insecta	N	Mac	H	2	0	0	0	0	2	2
TER-PG-T-33_B-JU-S05	NFF Pico Galhardo	Pico X B	TER-PG-T-33	26S	480249	4287288	BALA2	2010	June	Juniperus	B-JU-S05	78	Anaspis proteus (Wollaston)	Anaspis	proteus		Wollaston, 1854	Scraptiidae	Coleoptera	Insecta	N	Mac	H	3	0	0	0	0	3	3
TER-PG-T-33_B-JU-S09	NFF Pico Galhardo	Pico X B	TER-PG-T-33	26S	480249	4287288	BALA2	2010	June	Juniperus	B-JU-S09	78	Anaspis proteus (Wollaston)	Anaspis	proteus		Wollaston, 1854	Scraptiidae	Coleoptera	Insecta	N	Mac	H	2	0	0	0	0	2	2
TER-PG-T-33_B-JU-S10	NFF Pico Galhardo	Pico X B	TER-PG-T-33	26S	480249	4287288	BALA2	2010	June	Juniperus	B-JU-S10	78	Anaspis proteus (Wollaston)	Anaspis	proteus		Wollaston, 1854	Scraptiidae	Coleoptera	Insecta	N	Mac	H	1	0	0	0	0	1	1
TER-PG-T-33_B-LA-S10	NFF Pico Galhardo	Pico X B	TER-PG-T-33	26S	480249	4287288	BALA2	2010	June	laurus	B-LA-S10	78	Anaspis proteus (Wollaston)	Anaspis	proteus		Wollaston, 1854	Scraptiidae	Coleoptera	Insecta	N	Mac	H	1	0	0	0	0	1	1
TER-PG-T-33_B-VA-S02	NFF Pico Galhardo	Pico X B	TER-PG-T-33	26S	480249	4287288	BALA2	2010	June	Vaccinium	B-VA-S02	78	Anaspis proteus (Wollaston)	Anaspis	proteus		Wollaston, 1854	Scraptiidae	Coleoptera	Insecta	N	Mac	H	2	0	0	0	0	2	2
TER-PG-T-33_B-VA-S09	NFF Pico Galhardo	Pico X B	TER-PG-T-33	26S	480249	4287288	BALA2	2010	June	Vaccinium	B-VA-S09	78	Anaspis proteus (Wollaston)	Anaspis	proteus		Wollaston, 1854	Scraptiidae	Coleoptera	Insecta	N	Mac	H	1	0	0	0	0	1	1
TER-PG-T-33_B-VA-S10	NFF Pico Galhardo	Pico X B	TER-PG-T-33	26S	480249	4287288	BALA2	2010	June	Vaccinium	B-VA-S10	78	Anaspis proteus (Wollaston)	Anaspis	proteus		Wollaston, 1854	Scraptiidae	Coleoptera	Insecta	N	Mac	H	1	0	0	0	0	1	1
TER-PG-T-40_B-VA-S10	NFF Pico Galhardo	Pico X C	TER-PG-T-40	26S	480133	4287199	PhD Clara	2003	August	Vaccinium	B-VA-S10	78	Anaspis proteus (Wollaston)	Anaspis	proteus		Wollaston, 1854	Scraptiidae	Coleoptera	Insecta	N	Mac	H	1	0	0	0	0	1	1
TER-PG-T-44_B-LA-S02	NFF Pico Galhardo	Pico X D	TER-PG-T-44	26S	480217	4287486	PhD Clara	2003	July	Laurus	B-LA-S02	78	Anaspis proteus (Wollaston)	Anaspis	proteus		Wollaston, 1854	Scraptiidae	Coleoptera	Insecta	N	Mac	H	1	0	0	0	0	1	1
TER-PG-T-44_B-IL-S02	NFF Pico Galhardo	Pico X D	TER-PG-T-44	26S	480217	4287486	PhD Clara	2003	July	Ilex	B-IL-S02	78	Anaspis proteus (Wollaston)	Anaspis	proteus		Wollaston, 1854	Scraptiidae	Coleoptera	Insecta	N	Mac	H	1	0	0	0	0	1	1
TER-PG-TY33_B-JU-S01	NFF Pico Galhardo	Pico X B	TER-PG-TY33	26S	480249	4287288	PhD Clara	2003	September	Juniperus	B-JU-S01	78	Anaspis proteus (Wollaston)	Anaspis	proteus		Wollaston, 1854	Scraptiidae	Coleoptera	Insecta	N	Mac	H	1	0	0	0	0	1	1
TER-SB-T-06_B-JU-S02	NFF Serra Sta. Bárbara	Lagoinha	TER-SB-T-06	26S	471077	4289150	BALA	1999	June	Juniperus	B-JU-S02	78	Anaspis proteus (Wollaston)	Anaspis	proteus		Wollaston, 1854	Scraptiidae	Coleoptera	Insecta	N	Mac	H	1	0	0	0	0	1	1
TER-SB-T-06_B-JU-S03	NFF Serra Sta. Bárbara	Lagoinha	TER-SB-T-06	26S	471077	4289150	BALA	1999	June	Juniperus	B-JU-S03	78	Anaspis proteus (Wollaston)	Anaspis	proteus		Wollaston, 1854	Scraptiidae	Coleoptera	Insecta	N	Mac	H	2	0	0	0	0	2	2
TER-SB-T-06_B-JU-S04	NFF Serra Sta. Bárbara	Lagoinha	TER-SB-T-06	26S	471077	4289150	BALA	1999	June	Juniperus	B-JU-S04	78	Anaspis proteus (Wollaston)	Anaspis	proteus		Wollaston, 1854	Scraptiidae	Coleoptera	Insecta	N	Mac	H	4	0	0	0	0	4	4
TER-SB-T-06_B-JU-S08	NFF Serra Sta. Bárbara	Lagoinha	TER-SB-T-06	26S	471077	4289150	BALA	1999	June	Juniperus	B-JU-S08	78	Anaspis proteus (Wollaston)	Anaspis	proteus		Wollaston, 1854	Scraptiidae	Coleoptera	Insecta	N	Mac	H	1	0	0	0	0	1	1
TER-SB-T-06_B-IL-S01	NFF Serra Sta. Bárbara	Lagoinha	TER-SB-T-06	26S	471077	4289150	BALA	1999	June	Ilex	B-IL-S01	78	Anaspis proteus (Wollaston)	Anaspis	proteus		Wollaston, 1854	Scraptiidae	Coleoptera	Insecta	N	Mac	H	5	0	0	0	0	5	5
TER-SB-T-06_B-IL-S02	NFF Serra Sta. Bárbara	Lagoinha	TER-SB-T-06	26S	471077	4289150	BALA	1999	June	Ilex	B-IL-S02	78	Anaspis proteus (Wollaston)	Anaspis	proteus		Wollaston, 1854	Scraptiidae	Coleoptera	Insecta	N	Mac	H	1	0	0	0	0	1	1
TER-SB-T-06_B-IL-S03	NFF Serra Sta. Bárbara	Lagoinha	TER-SB-T-06	26S	471077	4289150	BALA	1999	June	Ilex	B-IL-S03	78	Anaspis proteus (Wollaston)	Anaspis	proteus		Wollaston, 1854	Scraptiidae	Coleoptera	Insecta	N	Mac	H	1	0	0	0	0	1	1
TER-SB-T-06_B-IL-S04	NFF Serra Sta. Bárbara	Lagoinha	TER-SB-T-06	26S	471077	4289150	BALA	1999	June	Ilex	B-IL-S04	78	Anaspis proteus (Wollaston)	Anaspis	proteus		Wollaston, 1854	Scraptiidae	Coleoptera	Insecta	N	Mac	H	2	0	0	0	0	2	2
TER-SB-T-06_B-IL-S05	NFF Serra Sta. Bárbara	Lagoinha	TER-SB-T-06	26S	471077	4289150	BALA	1999	June	Ilex	B-IL-S05	78	Anaspis proteus (Wollaston)	Anaspis	proteus		Wollaston, 1854	Scraptiidae	Coleoptera	Insecta	N	Mac	H	3	0	0	0	0	3	3
TER-SB-T-06_B-IL-S06	NFF Serra Sta. Bárbara	Lagoinha	TER-SB-T-06	26S	471077	4289150	BALA	1999	June	Ilex	B-IL-S06	78	Anaspis proteus (Wollaston)	Anaspis	proteus		Wollaston, 1854	Scraptiidae	Coleoptera	Insecta	N	Mac	H	1	0	0	0	0	1	1
TER-SB-T-06_B-IL-S08	NFF Serra Sta. Bárbara	Lagoinha	TER-SB-T-06	26S	471077	4289150	BALA	1999	June	Ilex	B-IL-S08	78	Anaspis proteus (Wollaston)	Anaspis	proteus		Wollaston, 1854	Scraptiidae	Coleoptera	Insecta	N	Mac	H	5	0	0	0	0	5	5
TER-SB-T-06_B-MS-S02	NFF Serra Sta. Bárbara	Lagoinha	TER-SB-T-06	26S	471077	4289150	BALA	1999	June	Myrsine	B-MS-S02	78	Anaspis proteus (Wollaston)	Anaspis	proteus		Wollaston, 1854	Scraptiidae	Coleoptera	Insecta	N	Mac	H	1	0	0	0	0	1	1
TER-SB-T-06_B-MS-S05	NFF Serra Sta. Bárbara	Lagoinha	TER-SB-T-06	26S	471077	4289150	BALA	1999	June	Myrsine	B-MS-S05	78	Anaspis proteus (Wollaston)	Anaspis	proteus		Wollaston, 1854	Scraptiidae	Coleoptera	Insecta	N	Mac	H	1	0	0	0	0	1	1
TER-SB-T-12_B-ER-S04	NFF Serra Sta. Bárbara	Pico Rachado	TER-SB-T-12	26S	473143	4290063	BALA	2001	July	Erica	B-ER-S04	78	Anaspis proteus (Wollaston)	Anaspis	proteus		Wollaston, 1854	Scraptiidae	Coleoptera	Insecta	N	Mac	H	1	0	0	0	0	1	1
TER-SB-T-12_B-ER-S05	NFF Serra Sta. Bárbara	Pico Rachado	TER-SB-T-12	26S	473143	4290063	BALA	2001	July	Erica	B-ER-S05	78	Anaspis proteus (Wollaston)	Anaspis	proteus		Wollaston, 1854	Scraptiidae	Coleoptera	Insecta	N	Mac	H	1	0	0	0	0	1	1
TER-SB-T-12_B-JU-S03	NFF Serra Sta. Bárbara	Pico Rachado	TER-SB-T-12	26S	473143	4290063	BALA	2001	July	Juniperus	B-JU-S03	78	Anaspis proteus (Wollaston)	Anaspis	proteus		Wollaston, 1854	Scraptiidae	Coleoptera	Insecta	N	Mac	H	1	0	0	0	0	1	1
TER-SB-TY06_B-MS-S03	NFF Serra Sta. Bárbara	Lagoinha	TER-SB-TY06	26S	471077	4289150	PhD Clara	2003	June	Myrsine	B-MS-S03	78	Anaspis proteus (Wollaston)	Anaspis	proteus		Wollaston, 1854	Scraptiidae	Coleoptera	Insecta	N	Mac	H	1	0	0	0	0	1	1
TER-SB-TY06_B-IL-S03	NFF Serra Sta. Bárbara	Lagoinha	TER-SB-TY06	26S	471077	4289150	PhD Clara	2003	June	Ilex	B-IL-S03	78	Anaspis proteus (Wollaston)	Anaspis	proteus		Wollaston, 1854	Scraptiidae	Coleoptera	Insecta	N	Mac	H	3	0	0	0	0	3	3
TER-TB-T-15_B-IL-S07	NFF Terra Brava	Terra Brava A	TER-TB-T-15	26S	482438	4287412	BALA	2001	September	Ilex	B-IL-S07	78	Anaspis proteus (Wollaston)	Anaspis	proteus		Wollaston, 1854	Scraptiidae	Coleoptera	Insecta	N	Mac	H	2	0	0	0	0	2	2
TER-TB-T-18_B-JU-S08	NFF Terra Brava	Terra Brava B	TER-TB-T-18	26S	482792	4287094	Geotermia1	2002	July	Juniperus	B-JU-S08	78	Anaspis proteus (Wollaston)	Anaspis	proteus		Wollaston, 1854	Scraptiidae	Coleoptera	Insecta	N	Mac	H	1	0	0	0	0	1	1
TER-TB-T-18_B-LA-S07	NFF Terra Brava	Terra Brava B	TER-TB-T-18	26S	482792	4287094	Geotermia1	2002	July	Laurus	B-LA-S07	78	Anaspis proteus (Wollaston)	Anaspis	proteus		Wollaston, 1854	Scraptiidae	Coleoptera	Insecta	N	Mac	H	1	0	0	0	0	1	1
TER-TB-TY15_B-LA-S05	NFF Terra Brava	Terra Brava A	TER-TB-TY15	26S	482438	4287412	PhD Clara	2003	June	Laurus	B-LA-S05	78	Anaspis proteus (Wollaston)	Anaspis	proteus		Wollaston, 1854	Scraptiidae	Coleoptera	Insecta	N	Mac	H	3	0	0	0	0	3	3
TER-TB-TY15_B-LA-S10	NFF Terra Brava	Terra Brava A	TER-TB-TY15	26S	482438	4287412	PhD Clara	2003	June	Laurus	B-LA-S10	78	Anaspis proteus (Wollaston)	Anaspis	proteus		Wollaston, 1854	Scraptiidae	Coleoptera	Insecta	N	Mac	H	1	0	0	0	0	1	1
TER-TB-TY15_B-JU-S07	NFF Terra Brava	Terra Brava A	TER-TB-TY15	26S	482438	4287412	PhD Clara	2003	June	Juniperus	B-JU-S07	78	Anaspis proteus (Wollaston)	Anaspis	proteus		Wollaston, 1854	Scraptiidae	Coleoptera	Insecta	N	Mac	H	3	0	0	0	0	3	3
TER-TB-TY15_B-IL-S10	NFF Terra Brava	Terra Brava A	TER-TB-TY15	26S	482438	4287412	PhD Clara	2003	June	Ilex	B-IL-S10	78	Anaspis proteus (Wollaston)	Anaspis	proteus		Wollaston, 1854	Scraptiidae	Coleoptera	Insecta	N	Mac	H	1	0	0	0	0	1	1
TER-TB-TY15_B-IL-S07	NFF Terra Brava	Terra Brava A	TER-TB-TY15	26S	482438	4287412	PhD Clara	2003	June	Ilex	B-IL-S07	78	Anaspis proteus (Wollaston)	Anaspis	proteus		Wollaston, 1854	Scraptiidae	Coleoptera	Insecta	N	Mac	H	1	0	0	0	0	1	1
FLO-FR-T-13_PT-ET-S06	NFF Caldeiras Funda e Rasa	Erical	FLO-FR-T-13	25S	137605	4370363	BALA	2000	September	Ethylene	PT-ET-S06	45	Anisodactylus binotatus (Fabricius)	Anisodactylus	binotatus		(Fabricius, 1787)	Carabidae	Coleoptera	Insecta	I		P	0	1	0	0	0	1	1
FLO-FR-T-13_PT-ET-S22	NFF Caldeiras Funda e Rasa	Erical	FLO-FR-T-13	25S	137605	4370363	BALA	2000	September	Ethylene	PT-ET-S22	45	Anisodactylus binotatus (Fabricius)	Anisodactylus	binotatus		(Fabricius, 1787)	Carabidae	Coleoptera	Insecta	I		P	0	1	0	0	0	1	1
FLO-FR-T-13_PT-TU-S23	NFF Caldeiras Funda e Rasa	Erical	FLO-FR-T-13	25S	137605	4370363	BALA	2000	September	Turquin	PT-TU-S23	45	Anisodactylus binotatus (Fabricius)	Anisodactylus	binotatus		(Fabricius, 1787)	Carabidae	Coleoptera	Insecta	I		P	0	1	0	0	0	1	1
FLO-FR-T-13_PT-TU-S17	NFF Caldeiras Funda e Rasa	Erical	FLO-FR-T-13	25S	137605	4370363	BALA	2000	September	Turquin	PT-TU-S17	45	Anisodactylus binotatus (Fabricius)	Anisodactylus	binotatus		(Fabricius, 1787)	Carabidae	Coleoptera	Insecta	I		P	0	1	0	0	0	1	1
PIC-MP-T-14_PT-ET-S18	NFF Mistério da Prainha	Chão Verde inferior cima	PIC-MP-T-14	26S	389041	4260364	BALA	2000	July	Ethylene	PT-ET-S18	45	Anisodactylus binotatus (Fabricius)	Anisodactylus	binotatus		(Fabricius, 1787)	Carabidae	Coleoptera	Insecta	I		P	0	0	1	0	0	1	1
SJG-TO-T-15_PT-ET-S10	NFF Topo	Topo juniperal	SJG-TO-T-15	26S	422255	4271216	PhD Clara	2004	July	Ethylene	PT-ET-S10	45	Anisodactylus binotatus (Fabricius)	Anisodactylus	binotatus		(Fabricius, 1787)	Carabidae	Coleoptera	Insecta	I		P	0	0	1	0	0	1	1
SMG-AT-T-12_PT-ET-S14	NFF Atalhada	Conteiras	SMG-AT-T-12	26S	657009	4188841	PhD Clara	2004	June	Ethylene	PT-ET-S14	45	Anisodactylus binotatus (Fabricius)	Anisodactylus	binotatus		(Fabricius, 1787)	Carabidae	Coleoptera	Insecta	I		P	0	0	1	0	0	1	1
SMG-AT-T-13_PT-ET-S02	NFF Atalhada	Borda precipício	SMG-AT-T-13	26S	657016	4188637	PhD Clara	2004	June	Ethylene	PT-ET-S02	45	Anisodactylus binotatus (Fabricius)	Anisodactylus	binotatus		(Fabricius, 1787)	Carabidae	Coleoptera	Insecta	I		P	0	1	0	0	0	1	1
SMG-AT-T-13_PT-ET-S04	NFF Atalhada	Borda precipício	SMG-AT-T-13	26S	657016	4188637	PhD Clara	2004	June	Ethylene	PT-ET-S04	45	Anisodactylus binotatus (Fabricius)	Anisodactylus	binotatus		(Fabricius, 1787)	Carabidae	Coleoptera	Insecta	I		P	0	0	1	0	0	1	1
SMG-GR-T-07_PT-ET-S16	NFF Graminhais	Ribeira	SMG-GR-T-07	26S	654838	4185138	BALA2	2010	june	Ethylene	PT-ET-S16	45	Anisodactylus binotatus (Fabricius)	Anisodactylus	binotatus		(Fabricius, 1787)	Carabidae	Coleoptera	Insecta	I		P	0	0	1	0	0	1	1
SMR-PA-TA02_PT-TU-S29	NFF Pico Alto	Pico Alto STM B	SMR-PA-TA02	26S	669823	4094394	Tese Álvaro	1997	June	Turquin	PT-TU-S29	45	Anisodactylus binotatus (Fabricius)	Anisodactylus	binotatus		(Fabricius, 1787)	Carabidae	Coleoptera	Insecta	I		P	1	0	0	0	0	1	1
SMR-PA-TB01_PT-ET-S20	NFF Pico Alto	Pico Alto STM A	SMR-PA-TB01	26S	669927	4094384	Tese Álvaro	1997	June	Ethylene	PT-ET-S20	45	Anisodactylus binotatus (Fabricius)	Anisodactylus	binotatus		(Fabricius, 1787)	Carabidae	Coleoptera	Insecta	I		P	0	1	0	0	0	1	1
TER-GM-T-23_PT-ET-S14	NFF Caldeira Guilherme Moniz	GM touros	TER-GM-T-23	26S	482285	4284477	Geotermia1	2002	July	Ethylene	PT-ET-S14	45	Anisodactylus binotatus (Fabricius)	Anisodactylus	binotatus		(Fabricius, 1787)	Carabidae	Coleoptera	Insecta	I		P	0	1	0	0	0	1	1
TER-TB-T-15_PT-ET-S08	NFF Terra Brava	Terra Brava A	TER-TB-T-15	26S	482438	4287412	BALA2	2010	July	Ethylene	PT-ET-S08	45	Anisodactylus binotatus (Fabricius)	Anisodactylus	binotatus		(Fabricius, 1787)	Carabidae	Coleoptera	Insecta	I		P	0	0	1	0	0	1	1
TER-PG-T-33_B-JU-S04	NFF Pico Galhardo	Pico X B	TER-PG-T-33	26S	480249	4287288	BALA2	2010	June	Juniperus	B-JU-S04	979	Anobium punctatum (De Geer)	Anobium	punctatum		(DeGueer, 1774)	Anobiidae	Coleoptera	Insecta	I		H	1	0	0	0	0	1	1
PIC-LC-T-02_B-IL-S08	NFF Lagoa do Caiado	Euphorbia	PIC-LC-T-02	26S	390266	4257172	BALA	1999	September	Ilex	B-IL-S08	299	Anoecia corni (Fabricius)	Anoecia	corni		(Fabricius, 1775)	Drepanosiphidae	Hemiptera	Insecta	I		H	1	0	0	0	0	1	1
PIC-LC-T-02_PT-TU-S29	NFF Lagoa do Caiado	Euphorbia	PIC-LC-T-02	26S	390266	4257172	BALA	1999	September	Turquin	PT-TU-S29	299	Anoecia corni (Fabricius)	Anoecia	corni		(Fabricius, 1775)	Drepanosiphidae	Hemiptera	Insecta	I		H	1	0	0	0	0	1	1
SJG-PP-T-02_B-VA-S07	NFF Pico Pinheiro	Pinheiro juniperal	SJG-PP-T-02	26S	408586	4278492	BALA	1999	July	Vaccinium	B-VA-S07	299	Anoecia corni (Fabricius)	Anoecia	corni		(Fabricius, 1775)	Drepanosiphidae	Hemiptera	Insecta	I		H	1	0	0	0	0	1	1
TER-TB-T-18_B-LA-S06	NFF Terra Brava	Terra Brava B	TER-TB-T-18	26S	482792	4287094	Geotermia1	2002	July	Laurus	B-LA-S06	299	Anoecia corni (Fabricius)	Anoecia	corni		(Fabricius, 1775)	Drepanosiphidae	Hemiptera	Insecta	I		H	1	0	0	0	0	1	1
FAI-CF-T-10_PT-TU-S01	NFF Caldeira do Faial	Trilho Caldeira inferior	FAI-CF-T-10	26S	351110	4271917	PhD Clara	2004	July	Turquin	PT-TU-S01	926	Anoscopus albifrons (Linnaeus)	Anoscopus	albifrons		(Linnaeus, 1758)	Cicadellidae	Hemiptera	Insecta	N		H	0	0	0	1	0	1	0
FLO-FR-T-06_PT-ET-S22	NFF Caldeiras Funda e Rasa	Juniperal	FLO-FR-T-06	25S	136738	4370215	BALA	1999	July	Ethylene	PT-ET-S22	926	Anoscopus albifrons (Linnaeus)	Anoscopus	albifrons		(Linnaeus, 1758)	Cicadellidae	Hemiptera	Insecta	N		H	1	0	0	0	0	1	1
FLO-FR-T-13_PT-TU-S01	NFF Caldeiras Funda e Rasa	Erical	FLO-FR-T-13	25S	137605	4370363	BALA	2000	September	Turquin	PT-TU-S01	926	Anoscopus albifrons (Linnaeus)	Anoscopus	albifrons		(Linnaeus, 1758)	Cicadellidae	Hemiptera	Insecta	N		H	1	0	0	0	0	1	1
FLO-MA-T-03_PT-TU-S17	NFF Morro Alto e Pico da Sé	Caldeira Branca margem ribeira	FLO-MA-T-03	25S	136183	4374629	BALA	1999	July	Turquin	PT-TU-S17	926	Anoscopus albifrons (Linnaeus)	Anoscopus	albifrons		(Linnaeus, 1758)	Cicadellidae	Hemiptera	Insecta	N		H	1	0	0	0	0	1	1
FLO-MA-T-03_PT-TU-S01	NFF Morro Alto e Pico da Sé	Caldeira Branca margem ribeira	FLO-MA-T-03	25S	136183	4374629	BALA	1999	July	Turquin	PT-TU-S01	926	Anoscopus albifrons (Linnaeus)	Anoscopus	albifrons		(Linnaeus, 1758)	Cicadellidae	Hemiptera	Insecta	N		H	1	0	0	0	0	1	1
FLO-MA-T-03_PT-TU-S21	NFF Morro Alto e Pico da Sé	Caldeira Branca margem ribeira	FLO-MA-T-03	25S	136183	4374629	BALA	1999	July	Turquin	PT-TU-S21	926	Anoscopus albifrons (Linnaeus)	Anoscopus	albifrons		(Linnaeus, 1758)	Cicadellidae	Hemiptera	Insecta	N		H	1	0	0	0	0	1	1
FLO-MA-T-03_PT-TU-S29	NFF Morro Alto e Pico da Sé	Caldeira Branca margem ribeira	FLO-MA-T-03	25S	136183	4374629	BALA	1999	July	Turquin	PT-TU-S29	926	Anoscopus albifrons (Linnaeus)	Anoscopus	albifrons		(Linnaeus, 1758)	Cicadellidae	Hemiptera	Insecta	N		H	4	0	0	0	0	4	4
FLO-MA-T-03_PT-ET-S18	NFF Morro Alto e Pico da Sé	Caldeira Branca margem ribeira	FLO-MA-T-03	25S	136183	4374629	BALA	1999	July	Ethylene	PT-ET-S18	926	Anoscopus albifrons (Linnaeus)	Anoscopus	albifrons		(Linnaeus, 1758)	Cicadellidae	Hemiptera	Insecta	N		H	1	0	0	0	0	1	1
FLO-MA-T-03_PT-ET-S22	NFF Morro Alto e Pico da Sé	Caldeira Branca margem ribeira	FLO-MA-T-03	25S	136183	4374629	BALA	1999	July	Ethylene	PT-ET-S22	926	Anoscopus albifrons (Linnaeus)	Anoscopus	albifrons		(Linnaeus, 1758)	Cicadellidae	Hemiptera	Insecta	N		H	1	0	0	1	0	2	1
FLO-MA-T-05_PT-TU-S09	NFF Morro Alto e Pico da Sé	Encosta Caldeira Branca	FLO-MA-T-05	25S	137340	4375246	BALA	1999	July	Turquin	PT-TU-S09	926	Anoscopus albifrons (Linnaeus)	Anoscopus	albifrons		(Linnaeus, 1758)	Cicadellidae	Hemiptera	Insecta	N		H	2	0	0	0	0	2	2
FLO-MA-T-05_PT-TU-S21	NFF Morro Alto e Pico da Sé	Encosta Caldeira Branca	FLO-MA-T-05	25S	137340	4375246	BALA	1999	July	Turquin	PT-TU-S21	926	Anoscopus albifrons (Linnaeus)	Anoscopus	albifrons		(Linnaeus, 1758)	Cicadellidae	Hemiptera	Insecta	N		H	1	0	0	0	0	1	1
FLO-MA-T-05_PT-TU-S19	NFF Morro Alto e Pico da Sé	Encosta Caldeira Branca	FLO-MA-T-05	25S	137340	4375246	BALA	1999	July	Turquin	PT-TU-S19	926	Anoscopus albifrons (Linnaeus)	Anoscopus	albifrons		(Linnaeus, 1758)	Cicadellidae	Hemiptera	Insecta	N		H	1	0	0	1	0	2	1
FLO-MA-T-05_PT-TU-S17	NFF Morro Alto e Pico da Sé	Encosta Caldeira Branca	FLO-MA-T-05	25S	137340	4375246	BALA	1999	July	Turquin	PT-TU-S17	926	Anoscopus albifrons (Linnaeus)	Anoscopus	albifrons		(Linnaeus, 1758)	Cicadellidae	Hemiptera	Insecta	N		H	2	0	0	0	0	2	2
FLO-MA-T-05_PT-TU-S11	NFF Morro Alto e Pico da Sé	Encosta Caldeira Branca	FLO-MA-T-05	25S	137340	4375246	BALA	1999	July	Turquin	PT-TU-S11	926	Anoscopus albifrons (Linnaeus)	Anoscopus	albifrons		(Linnaeus, 1758)	Cicadellidae	Hemiptera	Insecta	N		H	2	0	0	1	0	3	2
FLO-MA-T-05_PT-ET-S24	NFF Morro Alto e Pico da Sé	Encosta Caldeira Branca	FLO-MA-T-05	25S	137340	4375246	BALA	1999	July	Ethylene	PT-ET-S24	926	Anoscopus albifrons (Linnaeus)	Anoscopus	albifrons		(Linnaeus, 1758)	Cicadellidae	Hemiptera	Insecta	N		H	0	0	0	1	0	1	0
FLO-MA-T-05_PT-ET-S22	NFF Morro Alto e Pico da Sé	Encosta Caldeira Branca	FLO-MA-T-05	25S	137340	4375246	BALA	1999	July	Ethylene	PT-ET-S22	926	Anoscopus albifrons (Linnaeus)	Anoscopus	albifrons		(Linnaeus, 1758)	Cicadellidae	Hemiptera	Insecta	N		H	1	0	0	0	0	1	1
FLO-MA-T-05_PT-ET-S08	NFF Morro Alto e Pico da Sé	Encosta Caldeira Branca	FLO-MA-T-05	25S	137340	4375246	BALA	1999	July	Ethylene	PT-ET-S08	926	Anoscopus albifrons (Linnaeus)	Anoscopus	albifrons		(Linnaeus, 1758)	Cicadellidae	Hemiptera	Insecta	N		H	1	0	0	0	0	1	1
FLO-MA-T-15_PT-ET-S02	NFF Morro Alto e Pico da Sé	Pico da Sé	FLO-MA-T-15	25S	138230	4377715	BALA	2000	September	Ethylene	PT-ET-S02	926	Anoscopus albifrons (Linnaeus)	Anoscopus	albifrons		(Linnaeus, 1758)	Cicadellidae	Hemiptera	Insecta	N		H	1	0	0	0	0	1	1
PIC-CA-T-08_PT-TU-S13	NFF Caveiro	Picos do Caveiro	PIC-CA-T-08	26S	395274	4255409	BALA	1999	September	Turquin	PT-TU-S13	926	Anoscopus albifrons (Linnaeus)	Anoscopus	albifrons		(Linnaeus, 1758)	Cicadellidae	Hemiptera	Insecta	N		H	1	0	0	0	0	1	1
PIC-CA-T-08_PT-ET-S10	NFF Caveiro	Picos do Caveiro	PIC-CA-T-08	26S	395274	4255409	BALA	1999	September	Ethylene	PT-ET-S10	926	Anoscopus albifrons (Linnaeus)	Anoscopus	albifrons		(Linnaeus, 1758)	Cicadellidae	Hemiptera	Insecta	N		H	1	0	0	0	0	1	1
PIC-CA-T-09_PT-TU-S23	NFF Caveiro	Caveiro base	PIC-CA-T-09	26S	394341	4255080	BALA2	2010	july	Turquin	PT-TU-S23	926	Anoscopus albifrons (Linnaeus)	Anoscopus	albifrons		(Linnaeus, 1758)	Cicadellidae	Hemiptera	Insecta	N		H	1	0	0	0	0	1	1
PIC-CA-T-21_B-IL-S04	NFF Caveiro	Caveiro morro	PIC-CA-T-21	26S	394055	4255376	BALA	2000	July	Ilex	B-IL-S04	926	Anoscopus albifrons (Linnaeus)	Anoscopus	albifrons		(Linnaeus, 1758)	Cicadellidae	Hemiptera	Insecta	N		H	1	0	0	0	0	1	1
PIC-CA-T-22_PT-ET-S06	NFF Caveiro	Caveiro meio da reserva	PIC-CA-T-22	26S	396643	4255074	BALA	2000	July	Ethylene	PT-ET-S06	926	Anoscopus albifrons (Linnaeus)	Anoscopus	albifrons		(Linnaeus, 1758)	Cicadellidae	Hemiptera	Insecta	N		H	1	0	0	0	0	1	1
PIC-LC-T-06_PT-ET-S12	NFF Lagoa do Caiado	Margem Lagoa	PIC-LC-T-06	26S	390720	4257063	BALA	1999	September	Ethylene	PT-ET-S12	926	Anoscopus albifrons (Linnaeus)	Anoscopus	albifrons		(Linnaeus, 1758)	Cicadellidae	Hemiptera	Insecta	N		H	1	0	0	1	0	2	1
PIC-MP-T-10_PT-ET-S12	NFF Mistério da Prainha	Mistério esq esq	PIC-MP-T-10	26S	388683	4257957	BALA2	2010	july	Ethylene	PT-ET-S12	926	Anoscopus albifrons (Linnaeus)	Anoscopus	albifrons		(Linnaeus, 1758)	Cicadellidae	Hemiptera	Insecta	N		H	1	0	0	0	0	1	1
PIC-MP-T-10_PT-ET-S20	NFF Mistério da Prainha	Mistério esq esq	PIC-MP-T-10	26S	388683	4257957	BALA2	2010	july	Ethylene	PT-ET-S20	926	Anoscopus albifrons (Linnaeus)	Anoscopus	albifrons		(Linnaeus, 1758)	Cicadellidae	Hemiptera	Insecta	N		H	1	0	0	0	0	1	1
PIC-MP-T-10_PT-ET-S02	NFF Mistério da Prainha	Mistério esq esq	PIC-MP-T-10	26S	388683	4257957	BALA2	2010	july	Ethylene	PT-ET-S02	926	Anoscopus albifrons (Linnaeus)	Anoscopus	albifrons		(Linnaeus, 1758)	Cicadellidae	Hemiptera	Insecta	N		H	1	0	0	0	0	1	1
PIC-MP-T-15_PT-TU-S25	NFF Mistério da Prainha	Chão Verde superior perpendicular	PIC-MP-T-15	26S	389035	4259508	BALA	2000	July	Turquin	PT-TU-S25	926	Anoscopus albifrons (Linnaeus)	Anoscopus	albifrons		(Linnaeus, 1758)	Cicadellidae	Hemiptera	Insecta	N		H	1	0	0	0	0	1	1
PIC-MP-T-18_B-ER-S09	NFF Mistério da Prainha	Mistério plateau dir	PIC-MP-T-18	26S	388485	4257668	BALA	2000	July	Erica	B-ER-S09	926	Anoscopus albifrons (Linnaeus)	Anoscopus	albifrons		(Linnaeus, 1758)	Cicadellidae	Hemiptera	Insecta	N		H	4	0	0	0	0	4	4
PIC-MP-T-19_PT-TU-S01	NFF Mistério da Prainha	Mistério plateau terminal	PIC-MP-T-19	26S	389130	4258082	BALA	2000	July	Turquin	PT-TU-S01	926	Anoscopus albifrons (Linnaeus)	Anoscopus	albifrons		(Linnaeus, 1758)	Cicadellidae	Hemiptera	Insecta	N		H	3	0	0	0	0	3	3
SJG-TO-T-12_B-VA-S02	NFF Topo	Mata Estado C2	SJG-TO-T-12	26S	421857	4272031	BALA	2000	August	Vaccinium	B-VA-S02	926	Anoscopus albifrons (Linnaeus)	Anoscopus	albifrons		(Linnaeus, 1758)	Cicadellidae	Hemiptera	Insecta	N		H	1	0	0	0	0	1	1
SJG-TO-T-15_PT-TU-S03	NFF Topo	Topo juniperal	SJG-TO-T-15	26S	422255	4271216	PhD Clara	2004	July	Turquin	PT-TU-S03	926	Anoscopus albifrons (Linnaeus)	Anoscopus	albifrons		(Linnaeus, 1758)	Cicadellidae	Hemiptera	Insecta	N		H	1	0	0	0	0	1	1
SJG-TO-T-15_PT-ET-S04	NFF Topo	Topo juniperal	SJG-TO-T-15	26S	422255	4271216	PhD Clara	2004	July	Ethylene	PT-ET-S04	926	Anoscopus albifrons (Linnaeus)	Anoscopus	albifrons		(Linnaeus, 1758)	Cicadellidae	Hemiptera	Insecta	N		H	1	0	0	0	0	1	1
SMG-PV-T-08_PT-ET-S28	NFF Pico da Vara	Pico Vara A	SMG-PV-T-08	26S	657757	4186138	BALA	1999	July	Ethylene	PT-ET-S28	926	Anoscopus albifrons (Linnaeus)	Anoscopus	albifrons		(Linnaeus, 1758)	Cicadellidae	Hemiptera	Insecta	N		H	1	0	0	0	0	1	1
SMR-PA-T-02_PT-ET-S22	NFF Pico Alto	Pico Alto STM B	SMR-PA-T-02	26S	669823	4094394	Tese Álvaro	1997	August	Ethylene	PT-ET-S22	926	Anoscopus albifrons (Linnaeus)	Anoscopus	albifrons		(Linnaeus, 1758)	Cicadellidae	Hemiptera	Insecta	N		H	1	0	0	0	0	1	1
SMR-PA-T-02_PT-TU-S03	NFF Pico Alto	Pico Alto STM B	SMR-PA-T-02	26S	669823	4094394	Tese Álvaro	1997	August	Turquin	PT-TU-S03	926	Anoscopus albifrons (Linnaeus)	Anoscopus	albifrons		(Linnaeus, 1758)	Cicadellidae	Hemiptera	Insecta	N		H	1	0	0	0	0	1	1
SMR-PA-TA02_PT-ET-S12	NFF Pico Alto	Pico Alto STM B	SMR-PA-TA02	26S	669823	4094394	Tese Álvaro	1997	June	Ethylene	PT-ET-S12	926	Anoscopus albifrons (Linnaeus)	Anoscopus	albifrons		(Linnaeus, 1758)	Cicadellidae	Hemiptera	Insecta	N		H	1	0	0	0	0	1	1
SMR-PA-TA02_PT-TU-S29	NFF Pico Alto	Pico Alto STM B	SMR-PA-TA02	26S	669823	4094394	Tese Álvaro	1997	June	Turquin	PT-TU-S29	926	Anoscopus albifrons (Linnaeus)	Anoscopus	albifrons		(Linnaeus, 1758)	Cicadellidae	Hemiptera	Insecta	N		H	1	0	0	0	0	1	1
SMR-PA-TB01_PT-TU-S21	NFF Pico Alto	Pico Alto STM A	SMR-PA-TB01	26S	669927	4094384	Tese Álvaro	1997	June	Turquin	PT-TU-S21	926	Anoscopus albifrons (Linnaeus)	Anoscopus	albifrons		(Linnaeus, 1758)	Cicadellidae	Hemiptera	Insecta	N		H	1	0	0	0	0	1	1
TER-BF-T-03_PT-TU-S13	NFF Biscoito da Ferraria	Pico Alto	TER-BF-T-03	26S	481809	4289747	PhD Clara	2003	August	Turquin	PT-TU-S13	926	Anoscopus albifrons (Linnaeus)	Anoscopus	albifrons		(Linnaeus, 1758)	Cicadellidae	Hemiptera	Insecta	N		H	1	0	0	0	0	1	1
TER-GM-T-23_PT-TU-S13	NFF Caldeira Guilherme Moniz	GM touros	TER-GM-T-23	26S	482285	4284477	Geotermia1	2002	July	Turquin	PT-TU-S13	926	Anoscopus albifrons (Linnaeus)	Anoscopus	albifrons		(Linnaeus, 1758)	Cicadellidae	Hemiptera	Insecta	N		H	1	0	0	0	0	1	1
TER-GM-T-53_PT-TU-S17	NFF Caldeira Guilherme Moniz	GM C	TER-GM-T-53	26S	481480	4284073	PhD Clara	2003	September	Turquin	PT-TU-S17	926	Anoscopus albifrons (Linnaeus)	Anoscopus	albifrons		(Linnaeus, 1758)	Cicadellidae	Hemiptera	Insecta	N		H	1	0	0	0	0	1	1
TER-GM-T-53_PT-TU-S01	NFF Caldeira Guilherme Moniz	GM C	TER-GM-T-53	26S	481480	4284073	PhD Clara	2003	September	Turquin	PT-TU-S01	926	Anoscopus albifrons (Linnaeus)	Anoscopus	albifrons		(Linnaeus, 1758)	Cicadellidae	Hemiptera	Insecta	N		H	1	0	0	0	0	1	1
TER-PG-T-40_PT-ET-S04	NFF Pico Galhardo	Pico X C	TER-PG-T-40	26S	480133	4287199	PhD Clara	2003	June	Ethylene	PT-ET-S04	926	Anoscopus albifrons (Linnaeus)	Anoscopus	albifrons		(Linnaeus, 1758)	Cicadellidae	Hemiptera	Insecta	N		H	0	0	0	1	0	1	0
TER-PG-T-44_PT-TU-S09	NFF Pico Galhardo	Pico X D	TER-PG-T-44	26S	480217	4287486	PhD Clara	2003	July	Turquin	PT-TU-S09	926	Anoscopus albifrons (Linnaeus)	Anoscopus	albifrons		(Linnaeus, 1758)	Cicadellidae	Hemiptera	Insecta	N		H	1	0	0	0	0	1	1
TER-SB-T-05_PT-ET-S28	NFF Serra Sta. Bárbara	Tanque	TER-SB-T-05	26S	471646	4286413	BALA	1999	June	Ethylene	PT-ET-S28	926	Anoscopus albifrons (Linnaeus)	Anoscopus	albifrons		(Linnaeus, 1758)	Cicadellidae	Hemiptera	Insecta	N		H	1	0	0	0	0	1	1
TER-SB-T-47_PT-TU-S05	NFF Serra Sta. Bárbara	Caldeira B	TER-SB-T-47	26S	472890	4287587	PhD Clara	2003	August	Turquin	PT-TU-S05	926	Anoscopus albifrons (Linnaeus)	Anoscopus	albifrons		(Linnaeus, 1758)	Cicadellidae	Hemiptera	Insecta	N		H	1	0	0	0	0	1	1
TER-SB-T-47_PT-TU-S15	NFF Serra Sta. Bárbara	Caldeira B	TER-SB-T-47	26S	472890	4287587	PhD Clara	2003	August	Turquin	PT-TU-S15	926	Anoscopus albifrons (Linnaeus)	Anoscopus	albifrons		(Linnaeus, 1758)	Cicadellidae	Hemiptera	Insecta	N		H	0	0	0	1	0	1	0
TER-SB-TE50_PT-TU-S01	NFF Serra Sta. Bárbara	Pinheiro Rachado	TER-SB-TE50	26S	472428	4289636	PhD Clara	2003	September	Turquin	PT-TU-S01	926	Anoscopus albifrons (Linnaeus)	Anoscopus	albifrons		(Linnaeus, 1758)	Cicadellidae	Hemiptera	Insecta	N		H	0	0	0	1	0	1	0
TER-SB-TE50_PT-TU-S13	NFF Serra Sta. Bárbara	Pinheiro Rachado	TER-SB-TE50	26S	472428	4289636	PhD Clara	2003	September	Turquin	PT-TU-S13	926	Anoscopus albifrons (Linnaeus)	Anoscopus	albifrons		(Linnaeus, 1758)	Cicadellidae	Hemiptera	Insecta	N		H	0	0	0	1	0	1	0
TER-TB-T-51_PT-TU-S19	NFF Terra Brava	Terra Brava D	TER-TB-T-51	26S	482031	4287697	PhD Clara	2003	September	Turquin	PT-TU-S19	926	Anoscopus albifrons (Linnaeus)	Anoscopus	albifrons		(Linnaeus, 1758)	Cicadellidae	Hemiptera	Insecta	N		H	1	0	0	1	0	2	1
FAI-CG-T-02_PT-TU-S23	NFF Cabeço do Fogo	Caldeira	FAI-CG-T-02	26S	346188	4272501	BALA	1999	September	Turquin	PT-TU-S23	106	Aphis craccivora Koch	Aphis	craccivora		Koch, 1854	Aphididae	Hemiptera	Insecta	N		H	0	0	0	1	0	1	0
FAI-CG-T-02_PT-TU-S01	NFF Cabeço do Fogo	Caldeira	FAI-CG-T-02	26S	346188	4272501	BALA	1999	September	Turquin	PT-TU-S01	106	Aphis craccivora Koch	Aphis	craccivora		Koch, 1854	Aphididae	Hemiptera	Insecta	N		H	0	0	0	1	0	1	0
SMR-PA-TB01_PT-ET-S08	NFF Pico Alto	Pico Alto STM A	SMR-PA-TB01	26S	669927	4094384	Tese Álvaro	1997	June	Ethylene	PT-ET-S08	106	Aphis craccivora Koch	Aphis	craccivora		Koch, 1854	Aphididae	Hemiptera	Insecta	N		H	1	0	0	0	0	1	1
TER-BF-TY01_B-JU-S07	NFF Biscoito da Ferraria	Labaçal T2 Clara	TER-BF-TY01	26S	480849	4290312	PhD Clara	2003	June	Juniperus	B-JU-S07	106	Aphis craccivora Koch	Aphis	craccivora		Koch, 1854	Aphididae	Hemiptera	Insecta	N		H	0	0	0	1	0	1	0
TER-GM-T-23_PT-ET-S06	NFF Caldeira Guilherme Moniz	GM touros	TER-GM-T-23	26S	482285	4284477	Geotermia1	2002	July	Ethylene	PT-ET-S06	106	Aphis craccivora Koch	Aphis	craccivora		Koch, 1854	Aphididae	Hemiptera	Insecta	N		H	0	0	0	1	0	1	0
TER-SB-T-05_B-JU-S01	NFF Serra Sta. Bárbara	Tanque	TER-SB-T-05	26S	471646	4286413	BALA	1999	June	Juniperus	B-JU-S01	106	Aphis craccivora Koch	Aphis	craccivora		Koch, 1854	Aphididae	Hemiptera	Insecta	N		H	0	0	0	1	0	1	0
FAI-CF-T-10_PT-TU-S09	NFF Caldeira do Faial	Trilho Caldeira inferior	FAI-CF-T-10	26S	351110	4271917	PhD Clara	2004	July	Turquin	PT-TU-S09	8	Aphrodes hamiltoni Quartau & Borges	Aphrodes	hamiltoni		Quartau& Borges, 2003	Cicadellidae	Hemiptera	Insecta	E	A_END	H	0	0	0	2		2	0
FAI-CF-T-10_PT-ET-S18	NFF Caldeira do Faial	Trilho Caldeira inferior	FAI-CF-T-10	26S	351110	4271917	PhD Clara	2004	July	Ethylene	PT-ET-S18	8	Aphrodes hamiltoni Quartau & Borges	Aphrodes	hamiltoni		Quartau& Borges, 2003	Cicadellidae	Hemiptera	Insecta	E	A_END	H	0	0	0	0	1	1	0
FAI-CF-T-10_PT-ET-S10	NFF Caldeira do Faial	Trilho Caldeira inferior	FAI-CF-T-10	26S	351110	4271917	BALA2	2010	September	Ethylene	PT-ET-S10	8	Aphrodes hamiltoni Quartau & Borges	Aphrodes	hamiltoni		Quartau& Borges, 2003	Cicadellidae	Hemiptera	Insecta	E	A_END	H	1	0	0	0	0	1	1
FAI-CF-T-10_PT-TU-S21	NFF Caldeira do Faial	Trilho Caldeira inferior	FAI-CF-T-10	26S	351110	4271917	BALA2	2010	September	Turquin	PT-TU-S21	8	Aphrodes hamiltoni Quartau & Borges	Aphrodes	hamiltoni		Quartau& Borges, 2003	Cicadellidae	Hemiptera	Insecta	E	A_END	H	1	0	0	0	0	1	1
FAI-CF-T-10_PT-ET-S30	NFF Caldeira do Faial	Trilho Caldeira inferior	FAI-CF-T-10	26S	351110	4271917	PhD Clara	2004	July	Ethylene	PT-ET-S30	8	Aphrodes hamiltoni Quartau & Borges	Aphrodes	hamiltoni		Quartau& Borges, 2003	Cicadellidae	Hemiptera	Insecta	E	A_END	H	1	0	0	0	0	1	1
FAI-CF-T-10_PT-ET-S12	NFF Caldeira do Faial	Trilho Caldeira inferior	FAI-CF-T-10	26S	351110	4271917	PhD Clara	2004	July	Ethylene	PT-ET-S12	8	Aphrodes hamiltoni Quartau & Borges	Aphrodes	hamiltoni		Quartau& Borges, 2003	Cicadellidae	Hemiptera	Insecta	E	A_END	H	0	0	0	1	0	1	0
FAI-CF-T-10_PT-ET-S24	NFF Caldeira do Faial	Trilho Caldeira inferior	FAI-CF-T-10	26S	351110	4271917	PhD Clara	2004	July	Ethylene	PT-ET-S24	8	Aphrodes hamiltoni Quartau & Borges	Aphrodes	hamiltoni		Quartau& Borges, 2003	Cicadellidae	Hemiptera	Insecta	E	A_END	H	1	0	0	0	0	1	1
FAI-CF-T-11_PT-TU-S15	NFF Caldeira do Faial	Fundo Caldeira	FAI-CF-T-11	26S	350857	4272272	PhD Clara	2004	July	Turquin	PT-TU-S15	8	Aphrodes hamiltoni Quartau & Borges	Aphrodes	hamiltoni		Quartau& Borges, 2003	Cicadellidae	Hemiptera	Insecta	E	A_END	H	0	0	0	2		2	0
FAI-CF-T-11_PT-ET-S10	NFF Caldeira do Faial	Fundo Caldeira	FAI-CF-T-11	26S	350857	4272272	PhD Clara	2004	July	Ethylene	PT-ET-S10	8	Aphrodes hamiltoni Quartau & Borges	Aphrodes	hamiltoni		Quartau& Borges, 2003	Cicadellidae	Hemiptera	Insecta	E	A_END	H	0	0	0	0	1	1	0
FAI-CF-T-11_PT-TU-S17	NFF Caldeira do Faial	Fundo Caldeira	FAI-CF-T-11	26S	350857	4272272	PhD Clara	2004	July	Turquin	PT-TU-S17	8	Aphrodes hamiltoni Quartau & Borges	Aphrodes	hamiltoni		Quartau& Borges, 2003	Cicadellidae	Hemiptera	Insecta	E	A_END	H	0	0	0	0	1	1	0
FAI-CF-T-11_PT-ET-S02	NFF Caldeira do Faial	Fundo Caldeira	FAI-CF-T-11	26S	350857	4272272	PhD Clara	2004	July	Ethylene	PT-ET-S02	8	Aphrodes hamiltoni Quartau & Borges	Aphrodes	hamiltoni		Quartau& Borges, 2003	Cicadellidae	Hemiptera	Insecta	E	A_END	H	0	0	0	3	0	3	0
FAI-CF-TB26_PT-TU-S07	NFF Caldeira do Faial	Fundo Caldeira2	FAI-CF-TB26	26S	350857	4272272	BALA2	2010	September	Turquin	PT-TU-S07	8	Aphrodes hamiltoni Quartau & Borges	Aphrodes	hamiltoni		Quartau& Borges, 2003	Cicadellidae	Hemiptera	Insecta	E	A_END	H				1		1	0
FAI-CF-TB26_PT-ET-S12	NFF Caldeira do Faial	Fundo Caldeira2	FAI-CF-TB26	26S	350857	4272272	BALA2	2010	September	Ethylene	PT-ET-S12	8	Aphrodes hamiltoni Quartau & Borges	Aphrodes	hamiltoni		Quartau& Borges, 2003	Cicadellidae	Hemiptera	Insecta	E	A_END	H	1					1	1
FAI-CF-TB26_PT-TU-S01	NFF Caldeira do Faial	Fundo Caldeira2	FAI-CF-TB26	26S	350857	4272272	BALA2	2010	September	Turquin	PT-TU-S01	8	Aphrodes hamiltoni Quartau & Borges	Aphrodes	hamiltoni		Quartau& Borges, 2003	Cicadellidae	Hemiptera	Insecta	E	A_END	H	2					2	2
FAI-CF-TB26_PT-TU-S11	NFF Caldeira do Faial	Fundo Caldeira2	FAI-CF-TB26	26S	350857	4272272	BALA2	2010	September	Turquin	PT-TU-S11	8	Aphrodes hamiltoni Quartau & Borges	Aphrodes	hamiltoni		Quartau& Borges, 2003	Cicadellidae	Hemiptera	Insecta	E	A_END	H	1					1	1
FAI-CF-TB26_PT-ET-S16	NFF Caldeira do Faial	Fundo Caldeira2	FAI-CF-TB26	26S	350857	4272272	BALA2	2010	September	Ethylene	PT-ET-S16	8	Aphrodes hamiltoni Quartau & Borges	Aphrodes	hamiltoni		Quartau& Borges, 2003	Cicadellidae	Hemiptera	Insecta	E	A_END	H				1		1	0
FAI-CF-TB26_PT-TU-S19	NFF Caldeira do Faial	Fundo Caldeira2	FAI-CF-TB26	26S	350857	4272272	BALA2	2010	September	Turquin	PT-TU-S19	8	Aphrodes hamiltoni Quartau & Borges	Aphrodes	hamiltoni		Quartau& Borges, 2003	Cicadellidae	Hemiptera	Insecta	E	A_END	H	1					1	1
FAI-CG-T-01_PT-ET-S30	NFF Cabeço do Fogo	Erical	FAI-CG-T-01	26S	345906	4272298	BALA2	2010	September	Ethylene	PT-ET-S30	8	Aphrodes hamiltoni Quartau & Borges	Aphrodes	hamiltoni		Quartau& Borges, 2003	Cicadellidae	Hemiptera	Insecta	E	A_END	H	1	0	0	0	0	1	1
FAI-CG-T-01_PT-TU-S15	NFF Cabeço do Fogo	Erical	FAI-CG-T-01	26S	345906	4272298	BALA2	2010	September	Turquin	PT-TU-S15	8	Aphrodes hamiltoni Quartau & Borges	Aphrodes	hamiltoni		Quartau& Borges, 2003	Cicadellidae	Hemiptera	Insecta	E	A_END	H	1	0	0	0	0	1	1
FAI-CG-T-02_PT-ET-S30	NFF Cabeço do Fogo	Caldeira	FAI-CG-T-02	26S	346188	4272501	BALA	1999	September	Ethylene	PT-ET-S30	8	Aphrodes hamiltoni Quartau & Borges	Aphrodes	hamiltoni		Quartau& Borges, 2003	Cicadellidae	Hemiptera	Insecta	E	A_END	H	1	0	0	0	0	1	1
FAI-CG-T-03_PT-TU-S03	NFF Cabeço do Fogo	Cabeço Fogo Erical	FAI-CG-T-03	26S	346239	4272261	PhD Clara	2004	July	Turquin	PT-TU-S03	8	Aphrodes hamiltoni Quartau & Borges	Aphrodes	hamiltoni		Quartau& Borges, 2003	Cicadellidae	Hemiptera	Insecta	E	A_END	H	0	0	0	0	1	1	0
FAI-CG-T-03_PT-ET-S08	NFF Cabeço do Fogo	Cabeço Fogo Erical	FAI-CG-T-03	26S	346239	4272261	BALA2	2010	September	Ethylene	PT-ET-S08	8	Aphrodes hamiltoni Quartau & Borges	Aphrodes	hamiltoni		Quartau& Borges, 2003	Cicadellidae	Hemiptera	Insecta	E	A_END	H	0	0	0	1	0	1	0
FAI-CG-T-03_PT-ET-S20	NFF Cabeço do Fogo	Cabeço Fogo Erical	FAI-CG-T-03	26S	346239	4272261	BALA2	2010	September	Ethylene	PT-ET-S20	8	Aphrodes hamiltoni Quartau & Borges	Aphrodes	hamiltoni		Quartau& Borges, 2003	Cicadellidae	Hemiptera	Insecta	E	A_END	H	1	0	0	0	0	1	1
FAI-CG-T-03_PT-ET-S04	NFF Cabeço do Fogo	Cabeço Fogo Erical	FAI-CG-T-03	26S	346239	4272261	BALA2	2010	September	Ethylene	PT-ET-S04	8	Aphrodes hamiltoni Quartau & Borges	Aphrodes	hamiltoni		Quartau& Borges, 2003	Cicadellidae	Hemiptera	Insecta	E	A_END	H	1	0	0	0	0	1	1
FAI-CG-T-03_PT-ET-S24	NFF Cabeço do Fogo	Cabeço Fogo Erical	FAI-CG-T-03	26S	346239	4272261	BALA2	2010	September	Ethylene	PT-ET-S24	8	Aphrodes hamiltoni Quartau & Borges	Aphrodes	hamiltoni		Quartau& Borges, 2003	Cicadellidae	Hemiptera	Insecta	E	A_END	H	2	0	0	0	0	2	2
FAI-CG-T-03_PT-ET-S26	NFF Cabeço do Fogo	Cabeço Fogo Erical	FAI-CG-T-03	26S	346239	4272261	BALA2	2010	September	Ethylene	PT-ET-S26	8	Aphrodes hamiltoni Quartau & Borges	Aphrodes	hamiltoni		Quartau& Borges, 2003	Cicadellidae	Hemiptera	Insecta	E	A_END	H	4	0	0	0	0	4	4
FAI-CG-T-03_PT-ET-S14	NFF Cabeço do Fogo	Cabeço Fogo Erical	FAI-CG-T-03	26S	346239	4272261	BALA2	2010	September	Ethylene	PT-ET-S14	8	Aphrodes hamiltoni Quartau & Borges	Aphrodes	hamiltoni		Quartau& Borges, 2003	Cicadellidae	Hemiptera	Insecta	E	A_END	H	1	0	0	0	0	1	1
FAI-CG-T-03_PT-TU-S07	NFF Cabeço do Fogo	Cabeço Fogo Erical	FAI-CG-T-03	26S	346239	4272261	BALA2	2010	September	Turquin	PT-TU-S07	8	Aphrodes hamiltoni Quartau & Borges	Aphrodes	hamiltoni		Quartau& Borges, 2003	Cicadellidae	Hemiptera	Insecta	E	A_END	H	2	0	0	0	0	2	2
FAI-CG-T-03_PT-TU-S23	NFF Cabeço do Fogo	Cabeço Fogo Erical	FAI-CG-T-03	26S	346239	4272261	BALA2	2010	September	Turquin	PT-TU-S23	8	Aphrodes hamiltoni Quartau & Borges	Aphrodes	hamiltoni		Quartau& Borges, 2003	Cicadellidae	Hemiptera	Insecta	E	A_END	H	1	0	0	0	0	1	1
FAI-CG-T-03_PT-TU-S11	NFF Cabeço do Fogo	Cabeço Fogo Erical	FAI-CG-T-03	26S	346239	4272261	BALA2	2010	September	Turquin	PT-TU-S11	8	Aphrodes hamiltoni Quartau & Borges	Aphrodes	hamiltoni		Quartau& Borges, 2003	Cicadellidae	Hemiptera	Insecta	E	A_END	H	1	0	0	0	0	1	1
FAI-CG-T-03_PT-TU-S15	NFF Cabeço do Fogo	Cabeço Fogo Erical	FAI-CG-T-03	26S	346239	4272261	PhD Clara	2004	July	Turquin	PT-TU-S15	8	Aphrodes hamiltoni Quartau & Borges	Aphrodes	hamiltoni		Quartau& Borges, 2003	Cicadellidae	Hemiptera	Insecta	E	A_END	H	0	0	0	1	0	1	0
FAI-CG-T-03_PT-ET-S10	NFF Cabeço do Fogo	Cabeço Fogo Erical	FAI-CG-T-03	26S	346239	4272261	PhD Clara	2004	July	Ethylene	PT-ET-S10	8	Aphrodes hamiltoni Quartau & Borges	Aphrodes	hamiltoni		Quartau& Borges, 2003	Cicadellidae	Hemiptera	Insecta	E	A_END	H	3	0	0	3	0	6	3
FAI-CG-T-03_PT-ET-S06	NFF Cabeço do Fogo	Cabeço Fogo Erical	FAI-CG-T-03	26S	346239	4272261	PhD Clara	2004	July	Ethylene	PT-ET-S06	8	Aphrodes hamiltoni Quartau & Borges	Aphrodes	hamiltoni		Quartau& Borges, 2003	Cicadellidae	Hemiptera	Insecta	E	A_END	H	1	0	0	0	0	1	1
FAI-CG-T-03_PT-ET-S08	NFF Cabeço do Fogo	Cabeço Fogo Erical	FAI-CG-T-03	26S	346239	4272261	PhD Clara	2004	July	Ethylene	PT-ET-S08	8	Aphrodes hamiltoni Quartau & Borges	Aphrodes	hamiltoni		Quartau& Borges, 2003	Cicadellidae	Hemiptera	Insecta	E	A_END	H	2	0	0	2	0	4	2
FAI-CG-T-03_PT-TU-S11	NFF Cabeço do Fogo	Cabeço Fogo Erical	FAI-CG-T-03	26S	346239	4272261	PhD Clara	2004	July	Turquin	PT-TU-S11	8	Aphrodes hamiltoni Quartau & Borges	Aphrodes	hamiltoni		Quartau& Borges, 2003	Cicadellidae	Hemiptera	Insecta	E	A_END	H	1	0	0	0	0	1	1
FAI-CG-T-03_PT-TU-S07	NFF Cabeço do Fogo	Cabeço Fogo Erical	FAI-CG-T-03	26S	346239	4272261	PhD Clara	2004	July	Turquin	PT-TU-S07	8	Aphrodes hamiltoni Quartau & Borges	Aphrodes	hamiltoni		Quartau& Borges, 2003	Cicadellidae	Hemiptera	Insecta	E	A_END	H	2	0	0	1	0	3	2
FAI-CG-T-03_PT-TU-S29	NFF Cabeço do Fogo	Cabeço Fogo Erical	FAI-CG-T-03	26S	346239	4272261	PhD Clara	2004	July	Turquin	PT-TU-S29	8	Aphrodes hamiltoni Quartau & Borges	Aphrodes	hamiltoni		Quartau& Borges, 2003	Cicadellidae	Hemiptera	Insecta	E	A_END	H	2	0	0	0	0	2	2
FAI-CG-T-03_PT-ET-S30	NFF Cabeço do Fogo	Cabeço Fogo Erical	FAI-CG-T-03	26S	346239	4272261	PhD Clara	2004	July	Ethylene	PT-ET-S30	8	Aphrodes hamiltoni Quartau & Borges	Aphrodes	hamiltoni		Quartau& Borges, 2003	Cicadellidae	Hemiptera	Insecta	E	A_END	H	1	0	0	0	0	1	1
FAI-CG-T-03_PT-TU-S05	NFF Cabeço do Fogo	Cabeço Fogo Erical	FAI-CG-T-03	26S	346239	4272261	PhD Clara	2004	July	Turquin	PT-TU-S05	8	Aphrodes hamiltoni Quartau & Borges	Aphrodes	hamiltoni		Quartau& Borges, 2003	Cicadellidae	Hemiptera	Insecta	E	A_END	H	1	0	0	0	0	1	1
FAI-CG-T-03_PT-ET-S24	NFF Cabeço do Fogo	Cabeço Fogo Erical	FAI-CG-T-03	26S	346239	4272261	PhD Clara	2004	July	Ethylene	PT-ET-S24	8	Aphrodes hamiltoni Quartau & Borges	Aphrodes	hamiltoni		Quartau& Borges, 2003	Cicadellidae	Hemiptera	Insecta	E	A_END	H	1	0	0	0	0	1	1
FAI-CG-T-03_PT-ET-S28	NFF Cabeço do Fogo	Cabeço Fogo Erical	FAI-CG-T-03	26S	346239	4272261	PhD Clara	2004	July	Ethylene	PT-ET-S28	8	Aphrodes hamiltoni Quartau & Borges	Aphrodes	hamiltoni		Quartau& Borges, 2003	Cicadellidae	Hemiptera	Insecta	E	A_END	H	2	0	0	0	0	2	2
FAI-CG-T-03_PT-TU-S09	NFF Cabeço do Fogo	Cabeço Fogo Erical	FAI-CG-T-03	26S	346239	4272261	PhD Clara	2004	July	Turquin	PT-TU-S09	8	Aphrodes hamiltoni Quartau & Borges	Aphrodes	hamiltoni		Quartau& Borges, 2003	Cicadellidae	Hemiptera	Insecta	E	A_END	H	1	0	0	1	0	2	1
FAI-CG-T-03_PT-TU-S13	NFF Cabeço do Fogo	Cabeço Fogo Erical	FAI-CG-T-03	26S	346239	4272261	PhD Clara	2004	July	Turquin	PT-TU-S13	8	Aphrodes hamiltoni Quartau & Borges	Aphrodes	hamiltoni		Quartau& Borges, 2003	Cicadellidae	Hemiptera	Insecta	E	A_END	H	1	0	0	0	0	1	1
FAI-CG-T-04_PT-TU-S19	NFF Cabeço do Fogo	Cabeço Fogo Contorno	FAI-CG-T-04	26S	346051	4272725	PhD Clara	2004	July	Turquin	PT-TU-S19	8	Aphrodes hamiltoni Quartau & Borges	Aphrodes	hamiltoni		Quartau& Borges, 2003	Cicadellidae	Hemiptera	Insecta	E	A_END	H	1	0	0	0	0	1	1
FAI-CG-T-04_PT-TU-S13	NFF Cabeço do Fogo	Cabeço Fogo Contorno	FAI-CG-T-04	26S	346051	4272725	PhD Clara	2004	July	Turquin	PT-TU-S13	8	Aphrodes hamiltoni Quartau & Borges	Aphrodes	hamiltoni		Quartau& Borges, 2003	Cicadellidae	Hemiptera	Insecta	E	A_END	H	1	0	0	0	0	1	1
FAI-CG-T-04_PT-ET-S22	NFF Cabeço do Fogo	Cabeço Fogo Contorno	FAI-CG-T-04	26S	346051	4272725	PhD Clara	2004	July	Ethylene	PT-ET-S22	8	Aphrodes hamiltoni Quartau & Borges	Aphrodes	hamiltoni		Quartau& Borges, 2003	Cicadellidae	Hemiptera	Insecta	E	A_END	H	2	0	0	0	0	2	2
FAI-CG-T-04_PT-TU-S21	NFF Cabeço do Fogo	Cabeço Fogo Contorno	FAI-CG-T-04	26S	346051	4272725	PhD Clara	2004	July	Turquin	PT-TU-S21	8	Aphrodes hamiltoni Quartau & Borges	Aphrodes	hamiltoni		Quartau& Borges, 2003	Cicadellidae	Hemiptera	Insecta	E	A_END	H	1	0	0	0	0	1	1
FLO-FR-T-06_PT-TU-S03	NFF Caldeiras Funda e Rasa	Juniperal	FLO-FR-T-06	25S	136738	4370215	BALA	1999	July	Turquin	PT-TU-S03	8	Aphrodes hamiltoni Quartau & Borges	Aphrodes	hamiltoni		Quartau& Borges, 2003	Cicadellidae	Hemiptera	Insecta	E	A_END	H	4	0	0	0	0	4	4
FLO-FR-T-06_PT-TU-S27	NFF Caldeiras Funda e Rasa	Juniperal	FLO-FR-T-06	25S	136738	4370215	BALA	1999	July	Turquin	PT-TU-S27	8	Aphrodes hamiltoni Quartau & Borges	Aphrodes	hamiltoni		Quartau& Borges, 2003	Cicadellidae	Hemiptera	Insecta	E	A_END	H	1	0	0	0	0	1	1
FLO-FR-T-06_PT-TU-S01	NFF Caldeiras Funda e Rasa	Juniperal	FLO-FR-T-06	25S	136738	4370215	BALA	1999	July	Turquin	PT-TU-S01	8	Aphrodes hamiltoni Quartau & Borges	Aphrodes	hamiltoni		Quartau& Borges, 2003	Cicadellidae	Hemiptera	Insecta	E	A_END	H	1	0	0	0	0	1	1
FLO-FR-T-06_PT-TU-S07	NFF Caldeiras Funda e Rasa	Juniperal	FLO-FR-T-06	25S	136738	4370215	BALA	1999	July	Turquin	PT-TU-S07	8	Aphrodes hamiltoni Quartau & Borges	Aphrodes	hamiltoni		Quartau& Borges, 2003	Cicadellidae	Hemiptera	Insecta	E	A_END	H	2	0	0	0	0	2	2
FLO-FR-T-06_PT-TU-S25	NFF Caldeiras Funda e Rasa	Juniperal	FLO-FR-T-06	25S	136738	4370215	BALA	1999	July	Turquin	PT-TU-S25	8	Aphrodes hamiltoni Quartau & Borges	Aphrodes	hamiltoni		Quartau& Borges, 2003	Cicadellidae	Hemiptera	Insecta	E	A_END	H	1	0	0	0	0	1	1
FLO-FR-T-06_PT-TU-S05	NFF Caldeiras Funda e Rasa	Juniperal	FLO-FR-T-06	25S	136738	4370215	BALA	1999	July	Turquin	PT-TU-S05	8	Aphrodes hamiltoni Quartau & Borges	Aphrodes	hamiltoni		Quartau& Borges, 2003	Cicadellidae	Hemiptera	Insecta	E	A_END	H	1	0	0	0	0	1	1
FLO-FR-T-06_PT-TU-S23	NFF Caldeiras Funda e Rasa	Juniperal	FLO-FR-T-06	25S	136738	4370215	BALA	1999	July	Turquin	PT-TU-S23	8	Aphrodes hamiltoni Quartau & Borges	Aphrodes	hamiltoni		Quartau& Borges, 2003	Cicadellidae	Hemiptera	Insecta	E	A_END	H	1	0	0	0	0	1	1
FLO-FR-T-06_PT-TU-S21	NFF Caldeiras Funda e Rasa	Juniperal	FLO-FR-T-06	25S	136738	4370215	BALA	1999	July	Turquin	PT-TU-S21	8	Aphrodes hamiltoni Quartau & Borges	Aphrodes	hamiltoni		Quartau& Borges, 2003	Cicadellidae	Hemiptera	Insecta	E	A_END	H	2	0	0	0	0	2	2
FLO-FR-T-06_PT-TU-S15	NFF Caldeiras Funda e Rasa	Juniperal	FLO-FR-T-06	25S	136738	4370215	BALA	1999	July	Turquin	PT-TU-S15	8	Aphrodes hamiltoni Quartau & Borges	Aphrodes	hamiltoni		Quartau& Borges, 2003	Cicadellidae	Hemiptera	Insecta	E	A_END	H	2	0	0	0	0	2	2
FLO-FR-T-06_PT-TU-S09	NFF Caldeiras Funda e Rasa	Juniperal	FLO-FR-T-06	25S	136738	4370215	BALA	1999	July	Turquin	PT-TU-S09	8	Aphrodes hamiltoni Quartau & Borges	Aphrodes	hamiltoni		Quartau& Borges, 2003	Cicadellidae	Hemiptera	Insecta	E	A_END	H	1	0	0	0	0	1	1
FLO-FR-T-06_PT-TU-S29	NFF Caldeiras Funda e Rasa	Juniperal	FLO-FR-T-06	25S	136738	4370215	BALA	1999	July	Turquin	PT-TU-S29	8	Aphrodes hamiltoni Quartau & Borges	Aphrodes	hamiltoni		Quartau& Borges, 2003	Cicadellidae	Hemiptera	Insecta	E	A_END	H	1	0	0	0	0	1	1
FLO-FR-T-06_PT-TU-S13	NFF Caldeiras Funda e Rasa	Juniperal	FLO-FR-T-06	25S	136738	4370215	BALA	1999	July	Turquin	PT-TU-S13	8	Aphrodes hamiltoni Quartau & Borges	Aphrodes	hamiltoni		Quartau& Borges, 2003	Cicadellidae	Hemiptera	Insecta	E	A_END	H	1	0	0	0	0	1	1
FLO-FR-T-06_PT-ET-S20	NFF Caldeiras Funda e Rasa	Juniperal	FLO-FR-T-06	25S	136738	4370215	BALA	1999	July	Ethylene	PT-ET-S20	8	Aphrodes hamiltoni Quartau & Borges	Aphrodes	hamiltoni		Quartau& Borges, 2003	Cicadellidae	Hemiptera	Insecta	E	A_END	H	1	0	0	0	0	1	1
FLO-FR-T-06_PT-ET-S18	NFF Caldeiras Funda e Rasa	Juniperal	FLO-FR-T-06	25S	136738	4370215	BALA	1999	July	Ethylene	PT-ET-S18	8	Aphrodes hamiltoni Quartau & Borges	Aphrodes	hamiltoni		Quartau& Borges, 2003	Cicadellidae	Hemiptera	Insecta	E	A_END	H	2	0	0	0	0	2	2
FLO-FR-T-06_PT-ET-S08	NFF Caldeiras Funda e Rasa	Juniperal	FLO-FR-T-06	25S	136738	4370215	BALA	1999	July	Ethylene	PT-ET-S08	8	Aphrodes hamiltoni Quartau & Borges	Aphrodes	hamiltoni		Quartau& Borges, 2003	Cicadellidae	Hemiptera	Insecta	E	A_END	H	6	0	0	1	0	7	6
FLO-FR-T-06_PT-ET-S02	NFF Caldeiras Funda e Rasa	Juniperal	FLO-FR-T-06	25S	136738	4370215	BALA	1999	July	Ethylene	PT-ET-S02	8	Aphrodes hamiltoni Quartau & Borges	Aphrodes	hamiltoni		Quartau& Borges, 2003	Cicadellidae	Hemiptera	Insecta	E	A_END	H	2	0	0	0	0	2	2
FLO-FR-T-07_B-JU-S05	NFF Caldeiras Funda e Rasa	Encosta Caldeira Funda	FLO-FR-T-07	25S	136817	4370019	BALA	1999	July	Juniperus	B-JU-S05	8	Aphrodes hamiltoni Quartau & Borges	Aphrodes	hamiltoni		Quartau& Borges, 2003	Cicadellidae	Hemiptera	Insecta	E	A_END	H	1	0	0	0	0	1	1
FLO-FR-T-07_PT-TU-S09	NFF Caldeiras Funda e Rasa	Encosta Caldeira Funda	FLO-FR-T-07	25S	136817	4370019	BALA	1999	July	Turquin	PT-TU-S09	8	Aphrodes hamiltoni Quartau & Borges	Aphrodes	hamiltoni		Quartau& Borges, 2003	Cicadellidae	Hemiptera	Insecta	E	A_END	H	1	0	0	0	0	1	1
FLO-FR-T-07_PT-TU-S27	NFF Caldeiras Funda e Rasa	Encosta Caldeira Funda	FLO-FR-T-07	25S	136817	4370019	BALA	1999	July	Turquin	PT-TU-S27	8	Aphrodes hamiltoni Quartau & Borges	Aphrodes	hamiltoni		Quartau& Borges, 2003	Cicadellidae	Hemiptera	Insecta	E	A_END	H	1	0	0	0	0	1	1
FLO-FR-T-07_PT-TU-S03	NFF Caldeiras Funda e Rasa	Encosta Caldeira Funda	FLO-FR-T-07	25S	136817	4370019	BALA	1999	July	Turquin	PT-TU-S03	8	Aphrodes hamiltoni Quartau & Borges	Aphrodes	hamiltoni		Quartau& Borges, 2003	Cicadellidae	Hemiptera	Insecta	E	A_END	H	1	0	0	0	0	1	1
FLO-FR-T-07_PT-TU-S13	NFF Caldeiras Funda e Rasa	Encosta Caldeira Funda	FLO-FR-T-07	25S	136817	4370019	BALA	1999	July	Turquin	PT-TU-S13	8	Aphrodes hamiltoni Quartau & Borges	Aphrodes	hamiltoni		Quartau& Borges, 2003	Cicadellidae	Hemiptera	Insecta	E	A_END	H	2	0	0	1	0	3	2
FLO-FR-T-07_PT-TU-S29	NFF Caldeiras Funda e Rasa	Encosta Caldeira Funda	FLO-FR-T-07	25S	136817	4370019	BALA	1999	July	Turquin	PT-TU-S29	8	Aphrodes hamiltoni Quartau & Borges	Aphrodes	hamiltoni		Quartau& Borges, 2003	Cicadellidae	Hemiptera	Insecta	E	A_END	H	0	0	0	1	0	1	0
FLO-FR-T-07_PT-TU-S05	NFF Caldeiras Funda e Rasa	Encosta Caldeira Funda	FLO-FR-T-07	25S	136817	4370019	BALA	1999	July	Turquin	PT-TU-S05	8	Aphrodes hamiltoni Quartau & Borges	Aphrodes	hamiltoni		Quartau& Borges, 2003	Cicadellidae	Hemiptera	Insecta	E	A_END	H	1	0	0	0	0	1	1
FLO-FR-T-07_PT-TU-S07	NFF Caldeiras Funda e Rasa	Encosta Caldeira Funda	FLO-FR-T-07	25S	136817	4370019	BALA	1999	July	Turquin	PT-TU-S07	8	Aphrodes hamiltoni Quartau & Borges	Aphrodes	hamiltoni		Quartau& Borges, 2003	Cicadellidae	Hemiptera	Insecta	E	A_END	H	3	0	0	1	0	4	3
FLO-FR-T-07_PT-ET-S28	NFF Caldeiras Funda e Rasa	Encosta Caldeira Funda	FLO-FR-T-07	25S	136817	4370019	BALA	1999	July	Ethylene	PT-ET-S28	8	Aphrodes hamiltoni Quartau & Borges	Aphrodes	hamiltoni		Quartau& Borges, 2003	Cicadellidae	Hemiptera	Insecta	E	A_END	H	1	0	0	0	0	1	1
FLO-FR-T-07_PT-ET-S08	NFF Caldeiras Funda e Rasa	Encosta Caldeira Funda	FLO-FR-T-07	25S	136817	4370019	BALA	1999	July	Ethylene	PT-ET-S08	8	Aphrodes hamiltoni Quartau & Borges	Aphrodes	hamiltoni		Quartau& Borges, 2003	Cicadellidae	Hemiptera	Insecta	E	A_END	H	1	0	0	0	0	1	1
FLO-FR-T-07_PT-ET-S16	NFF Caldeiras Funda e Rasa	Encosta Caldeira Funda	FLO-FR-T-07	25S	136817	4370019	BALA	1999	July	Ethylene	PT-ET-S16	8	Aphrodes hamiltoni Quartau & Borges	Aphrodes	hamiltoni		Quartau& Borges, 2003	Cicadellidae	Hemiptera	Insecta	E	A_END	H	1	0	0	0	0	1	1
FLO-FR-T-07_PT-ET-S02	NFF Caldeiras Funda e Rasa	Encosta Caldeira Funda	FLO-FR-T-07	25S	136817	4370019	BALA2	2010	July	Ethylene	PT-ET-S02	8	Aphrodes hamiltoni Quartau & Borges	Aphrodes	hamiltoni		Quartau& Borges, 2003	Cicadellidae	Hemiptera	Insecta	E	A_END	H	0	0	0	1	0	1	0
FLO-FR-T-07_PT-ET-S16	NFF Caldeiras Funda e Rasa	Encosta Caldeira Funda	FLO-FR-T-07	25S	136817	4370019	BALA2	2010	July	Ethylene	PT-ET-S16	8	Aphrodes hamiltoni Quartau & Borges	Aphrodes	hamiltoni		Quartau& Borges, 2003	Cicadellidae	Hemiptera	Insecta	E	A_END	H	1	0	0	0	0	1	1
FLO-FR-T-07_PT-ET-S26	NFF Caldeiras Funda e Rasa	Encosta Caldeira Funda	FLO-FR-T-07	25S	136817	4370019	BALA2	2010	July	Ethylene	PT-ET-S26	8	Aphrodes hamiltoni Quartau & Borges	Aphrodes	hamiltoni		Quartau& Borges, 2003	Cicadellidae	Hemiptera	Insecta	E	A_END	H	1	0	0	0	0	1	1
FLO-FR-T-07_PT-TU-S17	NFF Caldeiras Funda e Rasa	Encosta Caldeira Funda	FLO-FR-T-07	25S	136817	4370019	BALA2	2010	July	Turquin	PT-TU-S17	8	Aphrodes hamiltoni Quartau & Borges	Aphrodes	hamiltoni		Quartau& Borges, 2003	Cicadellidae	Hemiptera	Insecta	E	A_END	H	1	0	0	0	0	1	1
FLO-FR-T-07_PT-TU-S11	NFF Caldeiras Funda e Rasa	Encosta Caldeira Funda	FLO-FR-T-07	25S	136817	4370019	BALA2	2010	July	Turquin	PT-TU-S11	8	Aphrodes hamiltoni Quartau & Borges	Aphrodes	hamiltoni		Quartau& Borges, 2003	Cicadellidae	Hemiptera	Insecta	E	A_END	H	0	0	0	1	0	1	0
FLO-FR-T-12_PT-TU-S23	NFF Caldeiras Funda e Rasa	Encosta Erical	FLO-FR-T-12	25S	137301	4371286	BALA	2000	September	Turquin	PT-TU-S23	8	Aphrodes hamiltoni Quartau & Borges	Aphrodes	hamiltoni		Quartau& Borges, 2003	Cicadellidae	Hemiptera	Insecta	E	A_END	H	1	0	0	0	0	1	1
FLO-FR-T-12_PT-TU-S07	NFF Caldeiras Funda e Rasa	Encosta Erical	FLO-FR-T-12	25S	137301	4371286	BALA	2000	September	Turquin	PT-TU-S07	8	Aphrodes hamiltoni Quartau & Borges	Aphrodes	hamiltoni		Quartau& Borges, 2003	Cicadellidae	Hemiptera	Insecta	E	A_END	H	1	0	0	0	0	1	1
FLO-FR-T-12_PT-TU-S21	NFF Caldeiras Funda e Rasa	Encosta Erical	FLO-FR-T-12	25S	137301	4371286	BALA	2000	September	Turquin	PT-TU-S21	8	Aphrodes hamiltoni Quartau & Borges	Aphrodes	hamiltoni		Quartau& Borges, 2003	Cicadellidae	Hemiptera	Insecta	E	A_END	H	1	0	0	0	0	1	1
FLO-FR-T-12_PT-TU-S17	NFF Caldeiras Funda e Rasa	Encosta Erical	FLO-FR-T-12	25S	137301	4371286	BALA	2000	September	Turquin	PT-TU-S17	8	Aphrodes hamiltoni Quartau & Borges	Aphrodes	hamiltoni		Quartau& Borges, 2003	Cicadellidae	Hemiptera	Insecta	E	A_END	H	1	0	0	0	0	1	1
FLO-FR-T-12_PT-TU-S15	NFF Caldeiras Funda e Rasa	Encosta Erical	FLO-FR-T-12	25S	137301	4371286	BALA	2000	September	Turquin	PT-TU-S15	8	Aphrodes hamiltoni Quartau & Borges	Aphrodes	hamiltoni		Quartau& Borges, 2003	Cicadellidae	Hemiptera	Insecta	E	A_END	H	1	0	0	0	0	1	1
FLO-FR-T-12_PT-TU-S09	NFF Caldeiras Funda e Rasa	Encosta Erical	FLO-FR-T-12	25S	137301	4371286	BALA	2000	September	Turquin	PT-TU-S09	8	Aphrodes hamiltoni Quartau & Borges	Aphrodes	hamiltoni		Quartau& Borges, 2003	Cicadellidae	Hemiptera	Insecta	E	A_END	H	1	0	0	0	0	1	1
FLO-FR-T-12_PT-ET-S26	NFF Caldeiras Funda e Rasa	Encosta Erical	FLO-FR-T-12	25S	137301	4371286	BALA	2000	September	Ethylene	PT-ET-S26	8	Aphrodes hamiltoni Quartau & Borges	Aphrodes	hamiltoni		Quartau& Borges, 2003	Cicadellidae	Hemiptera	Insecta	E	A_END	H	1	0	0	0	0	1	1
FLO-FR-T-12_PT-ET-S28	NFF Caldeiras Funda e Rasa	Encosta Erical	FLO-FR-T-12	25S	137301	4371286	BALA	2000	September	Ethylene	PT-ET-S28	8	Aphrodes hamiltoni Quartau & Borges	Aphrodes	hamiltoni		Quartau& Borges, 2003	Cicadellidae	Hemiptera	Insecta	E	A_END	H	3	0	0	0	0	3	3
FLO-FR-T-12_PT-ET-S22	NFF Caldeiras Funda e Rasa	Encosta Erical	FLO-FR-T-12	25S	137301	4371286	BALA	2000	September	Ethylene	PT-ET-S22	8	Aphrodes hamiltoni Quartau & Borges	Aphrodes	hamiltoni		Quartau& Borges, 2003	Cicadellidae	Hemiptera	Insecta	E	A_END	H	1	0	0	0	0	1	1
FLO-FR-T-12_PT-ET-S02	NFF Caldeiras Funda e Rasa	Encosta Erical	FLO-FR-T-12	25S	137301	4371286	BALA	2000	September	Ethylene	PT-ET-S02	8	Aphrodes hamiltoni Quartau & Borges	Aphrodes	hamiltoni		Quartau& Borges, 2003	Cicadellidae	Hemiptera	Insecta	E	A_END	H	1	0	0	0	0	1	1
FLO-FR-T-12_PT-ET-S08	NFF Caldeiras Funda e Rasa	Encosta Erical	FLO-FR-T-12	25S	137301	4371286	BALA	2000	September	Ethylene	PT-ET-S08	8	Aphrodes hamiltoni Quartau & Borges	Aphrodes	hamiltoni		Quartau& Borges, 2003	Cicadellidae	Hemiptera	Insecta	E	A_END	H	1	0	0	0	0	1	1
FLO-FR-T-12_PT-ET-S04	NFF Caldeiras Funda e Rasa	Encosta Erical	FLO-FR-T-12	25S	137301	4371286	BALA	2000	September	Ethylene	PT-ET-S04	8	Aphrodes hamiltoni Quartau & Borges	Aphrodes	hamiltoni		Quartau& Borges, 2003	Cicadellidae	Hemiptera	Insecta	E	A_END	H	3	0	0	0	0	3	3
FLO-FR-T-13_PT-ET-S10	NFF Caldeiras Funda e Rasa	Erical	FLO-FR-T-13	25S	137605	4370363	BALA	2000	September	Ethylene	PT-ET-S10	8	Aphrodes hamiltoni Quartau & Borges	Aphrodes	hamiltoni		Quartau& Borges, 2003	Cicadellidae	Hemiptera	Insecta	E	A_END	H	1	0	0	0	0	1	1
FLO-FR-T-13_PT-ET-S18	NFF Caldeiras Funda e Rasa	Erical	FLO-FR-T-13	25S	137605	4370363	BALA	2000	September	Ethylene	PT-ET-S18	8	Aphrodes hamiltoni Quartau & Borges	Aphrodes	hamiltoni		Quartau& Borges, 2003	Cicadellidae	Hemiptera	Insecta	E	A_END	H	1	0	0	0	0	1	1
FLO-FR-T-13_PT-ET-S26	NFF Caldeiras Funda e Rasa	Erical	FLO-FR-T-13	25S	137605	4370363	BALA	2000	September	Ethylene	PT-ET-S26	8	Aphrodes hamiltoni Quartau & Borges	Aphrodes	hamiltoni		Quartau& Borges, 2003	Cicadellidae	Hemiptera	Insecta	E	A_END	H	1	0	0	0	0	1	1
FLO-FR-T-13_PT-ET-S20	NFF Caldeiras Funda e Rasa	Erical	FLO-FR-T-13	25S	137605	4370363	BALA	2000	September	Ethylene	PT-ET-S20	8	Aphrodes hamiltoni Quartau & Borges	Aphrodes	hamiltoni		Quartau& Borges, 2003	Cicadellidae	Hemiptera	Insecta	E	A_END	H	1	0	0	0	0	1	1
FLO-FR-T-13_PT-ET-S02	NFF Caldeiras Funda e Rasa	Erical	FLO-FR-T-13	25S	137605	4370363	BALA	2000	September	Ethylene	PT-ET-S02	8	Aphrodes hamiltoni Quartau & Borges	Aphrodes	hamiltoni		Quartau& Borges, 2003	Cicadellidae	Hemiptera	Insecta	E	A_END	H	1	0	0	0	0	1	1
FLO-FR-T-13_PT-ET-S24	NFF Caldeiras Funda e Rasa	Erical	FLO-FR-T-13	25S	137605	4370363	BALA	2000	September	Ethylene	PT-ET-S24	8	Aphrodes hamiltoni Quartau & Borges	Aphrodes	hamiltoni		Quartau& Borges, 2003	Cicadellidae	Hemiptera	Insecta	E	A_END	H	1	0	0	0	0	1	1
FLO-FR-T-13_PT-ET-S16	NFF Caldeiras Funda e Rasa	Erical	FLO-FR-T-13	25S	137605	4370363	BALA	2000	September	Ethylene	PT-ET-S16	8	Aphrodes hamiltoni Quartau & Borges	Aphrodes	hamiltoni		Quartau& Borges, 2003	Cicadellidae	Hemiptera	Insecta	E	A_END	H	1	0	0	0	0	1	1
FLO-FR-T-13_PT-TU-S27	NFF Caldeiras Funda e Rasa	Erical	FLO-FR-T-13	25S	137605	4370363	BALA	2000	September	Turquin	PT-TU-S27	8	Aphrodes hamiltoni Quartau & Borges	Aphrodes	hamiltoni		Quartau& Borges, 2003	Cicadellidae	Hemiptera	Insecta	E	A_END	H	1	0	0	0	0	1	1
FLO-FR-T-13_PT-TU-S15	NFF Caldeiras Funda e Rasa	Erical	FLO-FR-T-13	25S	137605	4370363	BALA	2000	September	Turquin	PT-TU-S15	8	Aphrodes hamiltoni Quartau & Borges	Aphrodes	hamiltoni		Quartau& Borges, 2003	Cicadellidae	Hemiptera	Insecta	E	A_END	H	2	0	0	0	0	2	2
FLO-FR-T-13_PT-TU-S23	NFF Caldeiras Funda e Rasa	Erical	FLO-FR-T-13	25S	137605	4370363	BALA	2000	September	Turquin	PT-TU-S23	8	Aphrodes hamiltoni Quartau & Borges	Aphrodes	hamiltoni		Quartau& Borges, 2003	Cicadellidae	Hemiptera	Insecta	E	A_END	H	1	0	0	0	0	1	1
FLO-FR-T-13_PT-TU-S09	NFF Caldeiras Funda e Rasa	Erical	FLO-FR-T-13	25S	137605	4370363	BALA	2000	September	Turquin	PT-TU-S09	8	Aphrodes hamiltoni Quartau & Borges	Aphrodes	hamiltoni		Quartau& Borges, 2003	Cicadellidae	Hemiptera	Insecta	E	A_END	H	2	0	0	0	0	2	2
FLO-FR-T-13_PT-TU-S17	NFF Caldeiras Funda e Rasa	Erical	FLO-FR-T-13	25S	137605	4370363	BALA	2000	September	Turquin	PT-TU-S17	8	Aphrodes hamiltoni Quartau & Borges	Aphrodes	hamiltoni		Quartau& Borges, 2003	Cicadellidae	Hemiptera	Insecta	E	A_END	H	1	0	0	0	0	1	1
FLO-MA-T-03_PT-TU-S15	NFF Morro Alto e Pico da Sé	Caldeira Branca margem ribeira	FLO-MA-T-03	25S	136183	4374629	BALA	1999	July	Turquin	PT-TU-S15	8	Aphrodes hamiltoni Quartau & Borges	Aphrodes	hamiltoni		Quartau& Borges, 2003	Cicadellidae	Hemiptera	Insecta	E	A_END	H	1	0	0	0	0	1	1
FLO-MA-T-04_PT-TU-S07	NFF Morro Alto e Pico da Sé	Ribeira da Fazenda	FLO-MA-T-04	25S	138309	4377246	BALA	1999	July	Turquin	PT-TU-S07	8	Aphrodes hamiltoni Quartau & Borges	Aphrodes	hamiltoni		Quartau& Borges, 2003	Cicadellidae	Hemiptera	Insecta	E	A_END	H	0	0	0	1	0	1	0
FLO-MA-T-04_PT-TU-S09	NFF Morro Alto e Pico da Sé	Ribeira da Fazenda	FLO-MA-T-04	25S	138309	4377246	BALA	1999	July	Turquin	PT-TU-S09	8	Aphrodes hamiltoni Quartau & Borges	Aphrodes	hamiltoni		Quartau& Borges, 2003	Cicadellidae	Hemiptera	Insecta	E	A_END	H	1	0	0	0	0	1	1
FLO-MA-T-04_PT-TU-S03	NFF Morro Alto e Pico da Sé	Ribeira da Fazenda	FLO-MA-T-04	25S	138309	4377246	BALA	1999	July	Turquin	PT-TU-S03	8	Aphrodes hamiltoni Quartau & Borges	Aphrodes	hamiltoni		Quartau& Borges, 2003	Cicadellidae	Hemiptera	Insecta	E	A_END	H	1	0	0	0	0	1	1
FLO-MA-T-05_B-LA-S09	NFF Morro Alto e Pico da Sé	Encosta Caldeira Branca	FLO-MA-T-05	25S	137340	4375246	BALA	1999	July	Laurus	B-LA-S09	8	Aphrodes hamiltoni Quartau & Borges	Aphrodes	hamiltoni		Quartau& Borges, 2003	Cicadellidae	Hemiptera	Insecta	E	A_END	H	1	0	0	0	0	1	1
FLO-MA-T-05_PT-TU-S17	NFF Morro Alto e Pico da Sé	Encosta Caldeira Branca	FLO-MA-T-05	25S	137340	4375246	BALA	1999	July	Turquin	PT-TU-S17	8	Aphrodes hamiltoni Quartau & Borges	Aphrodes	hamiltoni		Quartau& Borges, 2003	Cicadellidae	Hemiptera	Insecta	E	A_END	H	1	0	0	0	0	1	1
FLO-MA-T-05_PT-TU-S03	NFF Morro Alto e Pico da Sé	Encosta Caldeira Branca	FLO-MA-T-05	25S	137340	4375246	BALA	1999	July	Turquin	PT-TU-S03	8	Aphrodes hamiltoni Quartau & Borges	Aphrodes	hamiltoni		Quartau& Borges, 2003	Cicadellidae	Hemiptera	Insecta	E	A_END	H	1	0	0	0	0	1	1
FLO-MA-T-05_PT-ET-S02	NFF Morro Alto e Pico da Sé	Encosta Caldeira Branca	FLO-MA-T-05	25S	137340	4375246	BALA	1999	July	Ethylene	PT-ET-S02	8	Aphrodes hamiltoni Quartau & Borges	Aphrodes	hamiltoni		Quartau& Borges, 2003	Cicadellidae	Hemiptera	Insecta	E	A_END	H	1	0	0	0	0	1	1
FLO-MA-T-05_PT-ET-S14	NFF Morro Alto e Pico da Sé	Encosta Caldeira Branca	FLO-MA-T-05	25S	137340	4375246	BALA	1999	July	Ethylene	PT-ET-S14	8	Aphrodes hamiltoni Quartau & Borges	Aphrodes	hamiltoni		Quartau& Borges, 2003	Cicadellidae	Hemiptera	Insecta	E	A_END	H	0	0	0	1	0	1	0
FLO-MA-T-05_PT-ET-S28	NFF Morro Alto e Pico da Sé	Encosta Caldeira Branca	FLO-MA-T-05	25S	137340	4375246	BALA	1999	July	Ethylene	PT-ET-S28	8	Aphrodes hamiltoni Quartau & Borges	Aphrodes	hamiltoni		Quartau& Borges, 2003	Cicadellidae	Hemiptera	Insecta	E	A_END	H	2	0	0	0	0	2	2
FLO-MA-T-05_PT-ET-S16	NFF Morro Alto e Pico da Sé	Encosta Caldeira Branca	FLO-MA-T-05	25S	137340	4375246	BALA	1999	July	Ethylene	PT-ET-S16	8	Aphrodes hamiltoni Quartau & Borges	Aphrodes	hamiltoni		Quartau& Borges, 2003	Cicadellidae	Hemiptera	Insecta	E	A_END	H	2	0	0	0	0	2	2
FLO-MA-T-08_B-CA-S09	NFF Morro Alto e Pico da Sé	Morro Alto Este	FLO-MA-T-08	25S	137809	4376293	BALA2	2010	July	Calluna	B-CA-S09	8	Aphrodes hamiltoni Quartau & Borges	Aphrodes	hamiltoni		Quartau& Borges, 2003	Cicadellidae	Hemiptera	Insecta	E	A_END	H	0	0	0	1	0	1	0
FLO-MA-T-08_PT-TU-S19	NFF Morro Alto e Pico da Sé	Morro Alto Este	FLO-MA-T-08	25S	137809	4376293	BALA2	2010	July	Turquin	PT-TU-S19	8	Aphrodes hamiltoni Quartau & Borges	Aphrodes	hamiltoni		Quartau& Borges, 2003	Cicadellidae	Hemiptera	Insecta	E	A_END	H	0	0	0	1	0	1	0
FLO-MA-T-11_PT-ET-S02	NFF Morro Alto e Pico da Sé	Morro Alto encosta E	FLO-MA-T-11	25S	137113	4376856	BALA	2000	September	Ethylene	PT-ET-S02	8	Aphrodes hamiltoni Quartau & Borges	Aphrodes	hamiltoni		Quartau& Borges, 2003	Cicadellidae	Hemiptera	Insecta	E	A_END	H	1	0	0	0	0	1	1
FLO-MA-T-11_PT-ET-S10	NFF Morro Alto e Pico da Sé	Morro Alto encosta E	FLO-MA-T-11	25S	137113	4376856	BALA	2000	September	Ethylene	PT-ET-S10	8	Aphrodes hamiltoni Quartau & Borges	Aphrodes	hamiltoni		Quartau& Borges, 2003	Cicadellidae	Hemiptera	Insecta	E	A_END	H	0	0	0	1	0	1	0
FLO-MA-T-11_PT-ET-S04	NFF Morro Alto e Pico da Sé	Morro Alto encosta E	FLO-MA-T-11	25S	137113	4376856	BALA	2000	September	Ethylene	PT-ET-S04	8	Aphrodes hamiltoni Quartau & Borges	Aphrodes	hamiltoni		Quartau& Borges, 2003	Cicadellidae	Hemiptera	Insecta	E	A_END	H	0	0	0	1	0	1	0
FLO-MA-T-14_PT-TU-S07	NFF Morro Alto e Pico da Sé	Caldeira Comprida	FLO-MA-T-14	25S	137246	4374777	BALA	2000	September	Turquin	PT-TU-S07	8	Aphrodes hamiltoni Quartau & Borges	Aphrodes	hamiltoni		Quartau& Borges, 2003	Cicadellidae	Hemiptera	Insecta	E	A_END	H	1	0	0	0	0	1	1
FLO-MA-T-14_PT-TU-S13	NFF Morro Alto e Pico da Sé	Caldeira Comprida	FLO-MA-T-14	25S	137246	4374777	BALA	2000	September	Turquin	PT-TU-S13	8	Aphrodes hamiltoni Quartau & Borges	Aphrodes	hamiltoni		Quartau& Borges, 2003	Cicadellidae	Hemiptera	Insecta	E	A_END	H	1	0	0	1	0	2	1
FLO-MA-T-16_PT-TU-S21	NFF Morro Alto e Pico da Sé	Ribeira do Cascalho	FLO-MA-T-16	25S	139699	4378652	BALA	2000	September	Turquin	PT-TU-S21	8	Aphrodes hamiltoni Quartau & Borges	Aphrodes	hamiltoni		Quartau& Borges, 2003	Cicadellidae	Hemiptera	Insecta	E	A_END	H	1	0	0	0	0	1	1
FLO-MA-T-16_PT-ET-S24	NFF Morro Alto e Pico da Sé	Ribeira do Cascalho	FLO-MA-T-16	25S	139699	4378652	BALA	2000	September	Ethylene	PT-ET-S24	8	Aphrodes hamiltoni Quartau & Borges	Aphrodes	hamiltoni		Quartau& Borges, 2003	Cicadellidae	Hemiptera	Insecta	E	A_END	H	1	0	0	0	0	1	1
FLO-MA-T-16_PT-ET-S16	NFF Morro Alto e Pico da Sé	Ribeira do Cascalho	FLO-MA-T-16	25S	139699	4378652	BALA	2000	September	Ethylene	PT-ET-S16	8	Aphrodes hamiltoni Quartau & Borges	Aphrodes	hamiltoni		Quartau& Borges, 2003	Cicadellidae	Hemiptera	Insecta	E	A_END	H	0	0	0	1	0	1	0
FLO-MA-T-16_PT-ET-S28	NFF Morro Alto e Pico da Sé	Ribeira do Cascalho	FLO-MA-T-16	25S	139699	4378652	BALA	2000	September	Ethylene	PT-ET-S28	8	Aphrodes hamiltoni Quartau & Borges	Aphrodes	hamiltoni		Quartau& Borges, 2003	Cicadellidae	Hemiptera	Insecta	E	A_END	H	1	0	0	0	0	1	1
FLO-MA-T-16_PT-ET-S22	NFF Morro Alto e Pico da Sé	Ribeira do Cascalho	FLO-MA-T-16	25S	139699	4378652	BALA	2000	September	Ethylene	PT-ET-S22	8	Aphrodes hamiltoni Quartau & Borges	Aphrodes	hamiltoni		Quartau& Borges, 2003	Cicadellidae	Hemiptera	Insecta	E	A_END	H	1	0	0	0	0	1	1
FLO-MA-T-16_PT-ET-S04	NFF Morro Alto e Pico da Sé	Ribeira do Cascalho	FLO-MA-T-16	25S	139699	4378652	BALA2	2010	July	Ethylene	PT-ET-S04	8	Aphrodes hamiltoni Quartau & Borges	Aphrodes	hamiltoni		Quartau& Borges, 2003	Cicadellidae	Hemiptera	Insecta	E	A_END	H	0	0	0	1	0	1	0
FLO-MA-T-16_PT-TU-S15	NFF Morro Alto e Pico da Sé	Ribeira do Cascalho	FLO-MA-T-16	25S	139699	4378652	BALA2	2010	July	Turquin	PT-TU-S15	8	Aphrodes hamiltoni Quartau & Borges	Aphrodes	hamiltoni		Quartau& Borges, 2003	Cicadellidae	Hemiptera	Insecta	E	A_END	H	0	0	0	1	0	1	0
FLO-MA-T-16_PT-TU-S11	NFF Morro Alto e Pico da Sé	Ribeira do Cascalho	FLO-MA-T-16	25S	139699	4378652	BALA2	2010	July	Turquin	PT-TU-S11	8	Aphrodes hamiltoni Quartau & Borges	Aphrodes	hamiltoni		Quartau& Borges, 2003	Cicadellidae	Hemiptera	Insecta	E	A_END	H	3	0	0	0	0	3	3
FLO-MA-T-16_PT-TU-S29	NFF Morro Alto e Pico da Sé	Ribeira do Cascalho	FLO-MA-T-16	25S	139699	4378652	BALA2	2010	July	Turquin	PT-TU-S29	8	Aphrodes hamiltoni Quartau & Borges	Aphrodes	hamiltoni		Quartau& Borges, 2003	Cicadellidae	Hemiptera	Insecta	E	A_END	H	1	0	0	0	0	1	1
PIC-CA-T-08_PT-TU-S17	NFF Caveiro	Picos do Caveiro	PIC-CA-T-08	26S	395274	4255409	BALA	1999	September	Turquin	PT-TU-S17	8	Aphrodes hamiltoni Quartau & Borges	Aphrodes	hamiltoni		Quartau& Borges, 2003	Cicadellidae	Hemiptera	Insecta	E	A_END	H	1	0	0	0	0	1	1
PIC-CA-T-08_PT-ET-S18	NFF Caveiro	Picos do Caveiro	PIC-CA-T-08	26S	395274	4255409	BALA	1999	September	Ethylene	PT-ET-S18	8	Aphrodes hamiltoni Quartau & Borges	Aphrodes	hamiltoni		Quartau& Borges, 2003	Cicadellidae	Hemiptera	Insecta	E	A_END	H	1	0	0	0	0	1	1
PIC-CA-T-08_PT-ET-S28	NFF Caveiro	Picos do Caveiro	PIC-CA-T-08	26S	395274	4255409	BALA	1999	September	Ethylene	PT-ET-S28	8	Aphrodes hamiltoni Quartau & Borges	Aphrodes	hamiltoni		Quartau& Borges, 2003	Cicadellidae	Hemiptera	Insecta	E	A_END	H	1	0	0	0	0	1	1
PIC-CA-T-08_PT-ET-S12	NFF Caveiro	Picos do Caveiro	PIC-CA-T-08	26S	395274	4255409	BALA	1999	September	Ethylene	PT-ET-S12	8	Aphrodes hamiltoni Quartau & Borges	Aphrodes	hamiltoni		Quartau& Borges, 2003	Cicadellidae	Hemiptera	Insecta	E	A_END	H	1	0	0	0	0	1	1
PIC-CA-T-08_PT-ET-S06	NFF Caveiro	Picos do Caveiro	PIC-CA-T-08	26S	395274	4255409	BALA	1999	September	Ethylene	PT-ET-S06	8	Aphrodes hamiltoni Quartau & Borges	Aphrodes	hamiltoni		Quartau& Borges, 2003	Cicadellidae	Hemiptera	Insecta	E	A_END	H	3	0	0	3	0	6	3
PIC-CA-T-08_PT-ET-S30	NFF Caveiro	Picos do Caveiro	PIC-CA-T-08	26S	395274	4255409	BALA	1999	September	Ethylene	PT-ET-S30	8	Aphrodes hamiltoni Quartau & Borges	Aphrodes	hamiltoni		Quartau& Borges, 2003	Cicadellidae	Hemiptera	Insecta	E	A_END	H	1	0	0	0	0	1	1
PIC-CA-T-08_PT-ET-S10	NFF Caveiro	Picos do Caveiro	PIC-CA-T-08	26S	395274	4255409	BALA2	2010	july	Ethylene	PT-ET-S10	8	Aphrodes hamiltoni Quartau & Borges	Aphrodes	hamiltoni		Quartau& Borges, 2003	Cicadellidae	Hemiptera	Insecta	E	A_END	H	0	0	0	1	0	1	0
PIC-CA-T-08_PT-TU-S21	NFF Caveiro	Picos do Caveiro	PIC-CA-T-08	26S	395274	4255409	BALA2	2010	july	Turquin	PT-TU-S21	8	Aphrodes hamiltoni Quartau & Borges	Aphrodes	hamiltoni		Quartau& Borges, 2003	Cicadellidae	Hemiptera	Insecta	E	A_END	H	0	0	0	1	0	1	0
PIC-CA-T-09_PT-TU-S05	NFF Caveiro	Caveiro base	PIC-CA-T-09	26S	394341	4255080	BALA	1999	September	Turquin	PT-TU-S05	8	Aphrodes hamiltoni Quartau & Borges	Aphrodes	hamiltoni		Quartau& Borges, 2003	Cicadellidae	Hemiptera	Insecta	E	A_END	H	0	0	0	1	0	1	0
PIC-CA-T-09_PT-TU-S03	NFF Caveiro	Caveiro base	PIC-CA-T-09	26S	394341	4255080	BALA	1999	September	Turquin	PT-TU-S03	8	Aphrodes hamiltoni Quartau & Borges	Aphrodes	hamiltoni		Quartau& Borges, 2003	Cicadellidae	Hemiptera	Insecta	E	A_END	H	1	0	0	0	0	1	1
PIC-CA-T-09_PT-TU-S01	NFF Caveiro	Caveiro base	PIC-CA-T-09	26S	394341	4255080	BALA	1999	September	Turquin	PT-TU-S01	8	Aphrodes hamiltoni Quartau & Borges	Aphrodes	hamiltoni		Quartau& Borges, 2003	Cicadellidae	Hemiptera	Insecta	E	A_END	H	1	0	0	0	0	1	1
PIC-CA-T-09_PT-TU-S11	NFF Caveiro	Caveiro base	PIC-CA-T-09	26S	394341	4255080	BALA	1999	September	Turquin	PT-TU-S11	8	Aphrodes hamiltoni Quartau & Borges	Aphrodes	hamiltoni		Quartau& Borges, 2003	Cicadellidae	Hemiptera	Insecta	E	A_END	H	0	0	0	1	0	1	0
PIC-CA-T-09_PT-ET-S28	NFF Caveiro	Caveiro base	PIC-CA-T-09	26S	394341	4255080	BALA	1999	September	Ethylene	PT-ET-S28	8	Aphrodes hamiltoni Quartau & Borges	Aphrodes	hamiltoni		Quartau& Borges, 2003	Cicadellidae	Hemiptera	Insecta	E	A_END	H	2	0	0	0	0	2	2
PIC-CA-T-09_PT-ET-S08	NFF Caveiro	Caveiro base	PIC-CA-T-09	26S	394341	4255080	BALA2	2010	july	Ethylene	PT-ET-S08	8	Aphrodes hamiltoni Quartau & Borges	Aphrodes	hamiltoni		Quartau& Borges, 2003	Cicadellidae	Hemiptera	Insecta	E	A_END	H	0	0	0	1	0	1	0
PIC-CA-T-09_PT-ET-S10	NFF Caveiro	Caveiro base	PIC-CA-T-09	26S	394341	4255080	BALA2	2010	july	Ethylene	PT-ET-S10	8	Aphrodes hamiltoni Quartau & Borges	Aphrodes	hamiltoni		Quartau& Borges, 2003	Cicadellidae	Hemiptera	Insecta	E	A_END	H	0	0	0	1	0	1	0
PIC-CA-T-21_PT-TU-S05	NFF Caveiro	Caveiro morro	PIC-CA-T-21	26S	394055	4255376	BALA	2000	July	Turquin	PT-TU-S05	8	Aphrodes hamiltoni Quartau & Borges	Aphrodes	hamiltoni		Quartau& Borges, 2003	Cicadellidae	Hemiptera	Insecta	E	A_END	H	0	0	0	1	0	1	0
PIC-CA-T-21_PT-TU-S07	NFF Caveiro	Caveiro morro	PIC-CA-T-21	26S	394055	4255376	BALA	2000	July	Turquin	PT-TU-S07	8	Aphrodes hamiltoni Quartau & Borges	Aphrodes	hamiltoni		Quartau& Borges, 2003	Cicadellidae	Hemiptera	Insecta	E	A_END	H	0	0	0	1	0	1	0
PIC-CA-T-21_PT-ET-S28	NFF Caveiro	Caveiro morro	PIC-CA-T-21	26S	394055	4255376	BALA	2000	July	Ethylene	PT-ET-S28	8	Aphrodes hamiltoni Quartau & Borges	Aphrodes	hamiltoni		Quartau& Borges, 2003	Cicadellidae	Hemiptera	Insecta	E	A_END	H	1	0	0	0	0	1	1
PIC-CA-T-22_PT-TU-S15	NFF Caveiro	Caveiro meio da reserva	PIC-CA-T-22	26S	396643	4255074	BALA	2000	July	Turquin	PT-TU-S15	8	Aphrodes hamiltoni Quartau & Borges	Aphrodes	hamiltoni		Quartau& Borges, 2003	Cicadellidae	Hemiptera	Insecta	E	A_END	H	0	0	0	1	0	1	0
PIC-CA-T-22_PT-TU-S07	NFF Caveiro	Caveiro meio da reserva	PIC-CA-T-22	26S	396643	4255074	BALA	2000	July	Turquin	PT-TU-S07	8	Aphrodes hamiltoni Quartau & Borges	Aphrodes	hamiltoni		Quartau& Borges, 2003	Cicadellidae	Hemiptera	Insecta	E	A_END	H	0	0	0	1	0	1	0
PIC-CA-T-22_PT-TU-S17	NFF Caveiro	Caveiro meio da reserva	PIC-CA-T-22	26S	396643	4255074	BALA	2000	July	Turquin	PT-TU-S17	8	Aphrodes hamiltoni Quartau & Borges	Aphrodes	hamiltoni		Quartau& Borges, 2003	Cicadellidae	Hemiptera	Insecta	E	A_END	H	0	0	0	1	0	1	0
PIC-CA-T-22_PT-ET-S28	NFF Caveiro	Caveiro meio da reserva	PIC-CA-T-22	26S	396643	4255074	BALA	2000	July	Ethylene	PT-ET-S28	8	Aphrodes hamiltoni Quartau & Borges	Aphrodes	hamiltoni		Quartau& Borges, 2003	Cicadellidae	Hemiptera	Insecta	E	A_END	H	1	0	0	0	0	1	1
PIC-LC-T-02_PT-ET-S22	NFF Lagoa do Caiado	Euphorbia	PIC-LC-T-02	26S	390266	4257172	BALA	1999	September	Ethylene	PT-ET-S22	8	Aphrodes hamiltoni Quartau & Borges	Aphrodes	hamiltoni		Quartau& Borges, 2003	Cicadellidae	Hemiptera	Insecta	E	A_END	H	0	0	0	1	0	1	0
PIC-LC-T-02_PT-ET-S06	NFF Lagoa do Caiado	Euphorbia	PIC-LC-T-02	26S	390266	4257172	BALA	1999	September	Ethylene	PT-ET-S06	8	Aphrodes hamiltoni Quartau & Borges	Aphrodes	hamiltoni		Quartau& Borges, 2003	Cicadellidae	Hemiptera	Insecta	E	A_END	H	1	0	0	0	0	1	1
PIC-LC-T-02_PT-ET-S14	NFF Lagoa do Caiado	Euphorbia	PIC-LC-T-02	26S	390266	4257172	BALA	1999	September	Ethylene	PT-ET-S14	8	Aphrodes hamiltoni Quartau & Borges	Aphrodes	hamiltoni		Quartau& Borges, 2003	Cicadellidae	Hemiptera	Insecta	E	A_END	H	2	0	0	0	0	2	2
PIC-LC-T-02_PT-ET-S02	NFF Lagoa do Caiado	Euphorbia	PIC-LC-T-02	26S	390266	4257172	BALA	1999	September	Ethylene	PT-ET-S02	8	Aphrodes hamiltoni Quartau & Borges	Aphrodes	hamiltoni		Quartau& Borges, 2003	Cicadellidae	Hemiptera	Insecta	E	A_END	H	0	0	0	1	0	1	0
PIC-LC-T-02_PT-ET-S04	NFF Lagoa do Caiado	Euphorbia	PIC-LC-T-02	26S	390266	4257172	BALA	1999	September	Ethylene	PT-ET-S04	8	Aphrodes hamiltoni Quartau & Borges	Aphrodes	hamiltoni		Quartau& Borges, 2003	Cicadellidae	Hemiptera	Insecta	E	A_END	H	1	0	0	0	0	1	1
PIC-LC-T-02_PT-ET-S08	NFF Lagoa do Caiado	Euphorbia	PIC-LC-T-02	26S	390266	4257172	BALA	1999	September	Ethylene	PT-ET-S08	8	Aphrodes hamiltoni Quartau & Borges	Aphrodes	hamiltoni		Quartau& Borges, 2003	Cicadellidae	Hemiptera	Insecta	E	A_END	H	0	0	0	1	0	1	0
PIC-LC-T-02_PT-ET-S30	NFF Lagoa do Caiado	Euphorbia	PIC-LC-T-02	26S	390266	4257172	BALA	1999	September	Ethylene	PT-ET-S30	8	Aphrodes hamiltoni Quartau & Borges	Aphrodes	hamiltoni		Quartau& Borges, 2003	Cicadellidae	Hemiptera	Insecta	E	A_END	H	1	0	0	0	0	1	1
PIC-LC-T-02_PT-TU-S09	NFF Lagoa do Caiado	Euphorbia	PIC-LC-T-02	26S	390266	4257172	BALA	1999	September	Turquin	PT-TU-S09	8	Aphrodes hamiltoni Quartau & Borges	Aphrodes	hamiltoni		Quartau& Borges, 2003	Cicadellidae	Hemiptera	Insecta	E	A_END	H	2	0	0	0	0	2	2
PIC-LC-T-02_PT-TU-S15	NFF Lagoa do Caiado	Euphorbia	PIC-LC-T-02	26S	390266	4257172	BALA	1999	September	Turquin	PT-TU-S15	8	Aphrodes hamiltoni Quartau & Borges	Aphrodes	hamiltoni		Quartau& Borges, 2003	Cicadellidae	Hemiptera	Insecta	E	A_END	H	0	0	0	4	0	4	0
PIC-LC-T-02_PT-TU-S05	NFF Lagoa do Caiado	Euphorbia	PIC-LC-T-02	26S	390266	4257172	BALA	1999	September	Turquin	PT-TU-S05	8	Aphrodes hamiltoni Quartau & Borges	Aphrodes	hamiltoni		Quartau& Borges, 2003	Cicadellidae	Hemiptera	Insecta	E	A_END	H	1	0	0	0	0	1	1
PIC-LC-T-02_PT-TU-S13	NFF Lagoa do Caiado	Euphorbia	PIC-LC-T-02	26S	390266	4257172	BALA	1999	September	Turquin	PT-TU-S13	8	Aphrodes hamiltoni Quartau & Borges	Aphrodes	hamiltoni		Quartau& Borges, 2003	Cicadellidae	Hemiptera	Insecta	E	A_END	H	1	0	0	0	0	1	1
PIC-LC-T-02_PT-TU-S01	NFF Lagoa do Caiado	Euphorbia	PIC-LC-T-02	26S	390266	4257172	BALA	1999	September	Turquin	PT-TU-S01	8	Aphrodes hamiltoni Quartau & Borges	Aphrodes	hamiltoni		Quartau& Borges, 2003	Cicadellidae	Hemiptera	Insecta	E	A_END	H	2	0	0	1	0	3	2
PIC-LC-T-02_PT-TU-S29	NFF Lagoa do Caiado	Euphorbia	PIC-LC-T-02	26S	390266	4257172	BALA	1999	September	Turquin	PT-TU-S29	8	Aphrodes hamiltoni Quartau & Borges	Aphrodes	hamiltoni		Quartau& Borges, 2003	Cicadellidae	Hemiptera	Insecta	E	A_END	H	1	0	0	0	0	1	1
PIC-LC-T-02_PT-TU-S23	NFF Lagoa do Caiado	Euphorbia	PIC-LC-T-02	26S	390266	4257172	BALA	1999	September	Turquin	PT-TU-S23	8	Aphrodes hamiltoni Quartau & Borges	Aphrodes	hamiltoni		Quartau& Borges, 2003	Cicadellidae	Hemiptera	Insecta	E	A_END	H	1	0	0	0	0	1	1
PIC-LC-T-02_PT-TU-S19	NFF Lagoa do Caiado	Euphorbia	PIC-LC-T-02	26S	390266	4257172	BALA	1999	September	Turquin	PT-TU-S19	8	Aphrodes hamiltoni Quartau & Borges	Aphrodes	hamiltoni		Quartau& Borges, 2003	Cicadellidae	Hemiptera	Insecta	E	A_END	H	1	0	0	0	0	1	1
PIC-LC-T-02_PT-TU-S11	NFF Lagoa do Caiado	Euphorbia	PIC-LC-T-02	26S	390266	4257172	BALA	1999	September	Turquin	PT-TU-S11	8	Aphrodes hamiltoni Quartau & Borges	Aphrodes	hamiltoni		Quartau& Borges, 2003	Cicadellidae	Hemiptera	Insecta	E	A_END	H	1	0	0	1	0	2	1
PIC-LC-T-06_PT-TU-S25	NFF Lagoa do Caiado	Margem Lagoa	PIC-LC-T-06	26S	390720	4257063	BALA	1999	September	Turquin	PT-TU-S25	8	Aphrodes hamiltoni Quartau & Borges	Aphrodes	hamiltoni		Quartau& Borges, 2003	Cicadellidae	Hemiptera	Insecta	E	A_END	H	0	0	0	2	0	2	0
PIC-LC-T-06_PT-ET-S26	NFF Lagoa do Caiado	Margem Lagoa	PIC-LC-T-06	26S	390720	4257063	BALA	1999	September	Ethylene	PT-ET-S26	8	Aphrodes hamiltoni Quartau & Borges	Aphrodes	hamiltoni		Quartau& Borges, 2003	Cicadellidae	Hemiptera	Insecta	E	A_END	H	0	0	0	1	0	1	0
PIC-LC-T-16_PT-ET-S08	NFF Lagoa do Caiado	Frente Lagoa	PIC-LC-T-16	26S	390537	4257057	BALA	2000	July	Ethylene	PT-ET-S08	8	Aphrodes hamiltoni Quartau & Borges	Aphrodes	hamiltoni		Quartau& Borges, 2003	Cicadellidae	Hemiptera	Insecta	E	A_END	H	0	0	0	1	0	1	0
PIC-LC-T-16_PT-ET-S28	NFF Lagoa do Caiado	Frente Lagoa	PIC-LC-T-16	26S	390537	4257057	BALA	2000	July	Ethylene	PT-ET-S28	8	Aphrodes hamiltoni Quartau & Borges	Aphrodes	hamiltoni		Quartau& Borges, 2003	Cicadellidae	Hemiptera	Insecta	E	A_END	H	0	0	0	1	0	1	0
PIC-LC-T-16_PT-TU-S25	NFF Lagoa do Caiado	Frente Lagoa	PIC-LC-T-16	26S	390537	4257057	BALA	2000	July	Turquin	PT-TU-S25	8	Aphrodes hamiltoni Quartau & Borges	Aphrodes	hamiltoni		Quartau& Borges, 2003	Cicadellidae	Hemiptera	Insecta	E	A_END	H	1	0	0	0	0	1	1
PIC-LC-T-16_PT-TU-S07	NFF Lagoa do Caiado	Frente Lagoa	PIC-LC-T-16	26S	390537	4257057	BALA	2000	July	Turquin	PT-TU-S07	8	Aphrodes hamiltoni Quartau & Borges	Aphrodes	hamiltoni		Quartau& Borges, 2003	Cicadellidae	Hemiptera	Insecta	E	A_END	H	1	0	0	0	0	1	1
PIC-LC-T-16_PT-TU-S03	NFF Lagoa do Caiado	Frente Lagoa	PIC-LC-T-16	26S	390537	4257057	BALA	2000	July	Turquin	PT-TU-S03	8	Aphrodes hamiltoni Quartau & Borges	Aphrodes	hamiltoni		Quartau& Borges, 2003	Cicadellidae	Hemiptera	Insecta	E	A_END	H	2	0	0	0	0	2	2
PIC-LC-T-16_PT-TU-S29	NFF Lagoa do Caiado	Frente Lagoa	PIC-LC-T-16	26S	390537	4257057	BALA	2000	July	Turquin	PT-TU-S29	8	Aphrodes hamiltoni Quartau & Borges	Aphrodes	hamiltoni		Quartau& Borges, 2003	Cicadellidae	Hemiptera	Insecta	E	A_END	H	2	0	0	0	0	2	2
PIC-LC-T-17_PT-TU-S13	NFF Lagoa do Caiado	Frente Euphorbia	PIC-LC-T-17	26S	390661	4257058	BALA	2000	July	Turquin	PT-TU-S13	8	Aphrodes hamiltoni Quartau & Borges	Aphrodes	hamiltoni		Quartau& Borges, 2003	Cicadellidae	Hemiptera	Insecta	E	A_END	H	0	0	0	1	0	1	0
PIC-LC-T-17_PT-TU-S27	NFF Lagoa do Caiado	Frente Euphorbia	PIC-LC-T-17	26S	390661	4257058	BALA	2000	July	Turquin	PT-TU-S27	8	Aphrodes hamiltoni Quartau & Borges	Aphrodes	hamiltoni		Quartau& Borges, 2003	Cicadellidae	Hemiptera	Insecta	E	A_END	H	0	0	0	1	0	1	0
PIC-LC-T-17_PT-TU-S17	NFF Lagoa do Caiado	Frente Euphorbia	PIC-LC-T-17	26S	390661	4257058	BALA	2000	July	Turquin	PT-TU-S17	8	Aphrodes hamiltoni Quartau & Borges	Aphrodes	hamiltoni		Quartau& Borges, 2003	Cicadellidae	Hemiptera	Insecta	E	A_END	H	0	0	0	1	0	1	0
PIC-LC-T-17_PT-TU-S21	NFF Lagoa do Caiado	Frente Euphorbia	PIC-LC-T-17	26S	390661	4257058	BALA	2000	July	Turquin	PT-TU-S21	8	Aphrodes hamiltoni Quartau & Borges	Aphrodes	hamiltoni		Quartau& Borges, 2003	Cicadellidae	Hemiptera	Insecta	E	A_END	H	0	0	0	1	0	1	0
PIC-LC-T-17_PT-TU-S23	NFF Lagoa do Caiado	Frente Euphorbia	PIC-LC-T-17	26S	390661	4257058	BALA	2000	July	Turquin	PT-TU-S23	8	Aphrodes hamiltoni Quartau & Borges	Aphrodes	hamiltoni		Quartau& Borges, 2003	Cicadellidae	Hemiptera	Insecta	E	A_END	H	0	0	0	1	0	1	0
PIC-LC-T-17_PT-TU-S25	NFF Lagoa do Caiado	Frente Euphorbia	PIC-LC-T-17	26S	390661	4257058	BALA	2000	July	Turquin	PT-TU-S25	8	Aphrodes hamiltoni Quartau & Borges	Aphrodes	hamiltoni		Quartau& Borges, 2003	Cicadellidae	Hemiptera	Insecta	E	A_END	H	0	0	0	1	0	1	0
PIC-LC-T-17_PT-ET-S14	NFF Lagoa do Caiado	Frente Euphorbia	PIC-LC-T-17	26S	390661	4257058	BALA	2000	July	Ethylene	PT-ET-S14	8	Aphrodes hamiltoni Quartau & Borges	Aphrodes	hamiltoni		Quartau& Borges, 2003	Cicadellidae	Hemiptera	Insecta	E	A_END	H	0	0	0	1	0	1	0
PIC-LC-T-17_PT-ET-S30	NFF Lagoa do Caiado	Frente Euphorbia	PIC-LC-T-17	26S	390661	4257058	BALA	2000	July	Ethylene	PT-ET-S30	8	Aphrodes hamiltoni Quartau & Borges	Aphrodes	hamiltoni		Quartau& Borges, 2003	Cicadellidae	Hemiptera	Insecta	E	A_END	H	0	0	0	1	0	1	0
PIC-LC-T-17_PT-ET-S26	NFF Lagoa do Caiado	Frente Euphorbia	PIC-LC-T-17	26S	390661	4257058	BALA	2000	July	Ethylene	PT-ET-S26	8	Aphrodes hamiltoni Quartau & Borges	Aphrodes	hamiltoni		Quartau& Borges, 2003	Cicadellidae	Hemiptera	Insecta	E	A_END	H	0	0	0	1	0	1	0
PIC-LC-T-17_PT-ET-S06	NFF Lagoa do Caiado	Frente Euphorbia	PIC-LC-T-17	26S	390661	4257058	BALA	2000	July	Ethylene	PT-ET-S06	8	Aphrodes hamiltoni Quartau & Borges	Aphrodes	hamiltoni		Quartau& Borges, 2003	Cicadellidae	Hemiptera	Insecta	E	A_END	H	0	0	0	1	0	1	0
PIC-MP-T-01_PT-TU-S01	NFF Mistério da Prainha	Chão Verde superior	PIC-MP-T-01	26S	388838	4259774	BALA	1999	September	Turquin	PT-TU-S01	8	Aphrodes hamiltoni Quartau & Borges	Aphrodes	hamiltoni		Quartau& Borges, 2003	Cicadellidae	Hemiptera	Insecta	E	A_END	H	1	0	0	0	0	1	1
PIC-MP-T-01_PT-TU-S07	NFF Mistério da Prainha	Chão Verde superior	PIC-MP-T-01	26S	388838	4259774	BALA	1999	September	Turquin	PT-TU-S07	8	Aphrodes hamiltoni Quartau & Borges	Aphrodes	hamiltoni		Quartau& Borges, 2003	Cicadellidae	Hemiptera	Insecta	E	A_END	H	2	0	0	0	0	2	2
PIC-MP-T-01_PT-TU-S15	NFF Mistério da Prainha	Chão Verde superior	PIC-MP-T-01	26S	388838	4259774	BALA	1999	September	Turquin	PT-TU-S15	8	Aphrodes hamiltoni Quartau & Borges	Aphrodes	hamiltoni		Quartau& Borges, 2003	Cicadellidae	Hemiptera	Insecta	E	A_END	H	1	0	0	0	0	1	1
PIC-MP-T-01_PT-TU-S17	NFF Mistério da Prainha	Chão Verde superior	PIC-MP-T-01	26S	388838	4259774	BALA	1999	September	Turquin	PT-TU-S17	8	Aphrodes hamiltoni Quartau & Borges	Aphrodes	hamiltoni		Quartau& Borges, 2003	Cicadellidae	Hemiptera	Insecta	E	A_END	H	3	0	0	0	0	3	3
PIC-MP-T-01_PT-TU-S23	NFF Mistério da Prainha	Chão Verde superior	PIC-MP-T-01	26S	388838	4259774	BALA	1999	September	Turquin	PT-TU-S23	8	Aphrodes hamiltoni Quartau & Borges	Aphrodes	hamiltoni		Quartau& Borges, 2003	Cicadellidae	Hemiptera	Insecta	E	A_END	H	1	0	0	0	0	1	1
PIC-MP-T-01_PT-TU-S29	NFF Mistério da Prainha	Chão Verde superior	PIC-MP-T-01	26S	388838	4259774	BALA	1999	September	Turquin	PT-TU-S29	8	Aphrodes hamiltoni Quartau & Borges	Aphrodes	hamiltoni		Quartau& Borges, 2003	Cicadellidae	Hemiptera	Insecta	E	A_END	H	1	0	0	0	0	1	1
PIC-MP-T-01_PT-ET-S08	NFF Mistério da Prainha	Chão Verde superior	PIC-MP-T-01	26S	388838	4259774	BALA	1999	September	Ethylene	PT-ET-S08	8	Aphrodes hamiltoni Quartau & Borges	Aphrodes	hamiltoni		Quartau& Borges, 2003	Cicadellidae	Hemiptera	Insecta	E	A_END	H	1	0	0	0	0	1	1
PIC-MP-T-01_PT-ET-S10	NFF Mistério da Prainha	Chão Verde superior	PIC-MP-T-01	26S	388838	4259774	BALA	1999	September	Ethylene	PT-ET-S10	8	Aphrodes hamiltoni Quartau & Borges	Aphrodes	hamiltoni		Quartau& Borges, 2003	Cicadellidae	Hemiptera	Insecta	E	A_END	H	1	0	0	0	0	1	1
PIC-MP-T-01_PT-ET-S14	NFF Mistério da Prainha	Chão Verde superior	PIC-MP-T-01	26S	388838	4259774	BALA	1999	September	Ethylene	PT-ET-S14	8	Aphrodes hamiltoni Quartau & Borges	Aphrodes	hamiltoni		Quartau& Borges, 2003	Cicadellidae	Hemiptera	Insecta	E	A_END	H	2	0	0	0	0	2	2
PIC-MP-T-01_PT-ET-S16	NFF Mistério da Prainha	Chão Verde superior	PIC-MP-T-01	26S	388838	4259774	BALA	1999	September	Ethylene	PT-ET-S16	8	Aphrodes hamiltoni Quartau & Borges	Aphrodes	hamiltoni		Quartau& Borges, 2003	Cicadellidae	Hemiptera	Insecta	E	A_END	H	1	0	0	0	0	1	1
PIC-MP-T-01_PT-ET-S18	NFF Mistério da Prainha	Chão Verde superior	PIC-MP-T-01	26S	388838	4259774	BALA	1999	September	Ethylene	PT-ET-S18	8	Aphrodes hamiltoni Quartau & Borges	Aphrodes	hamiltoni		Quartau& Borges, 2003	Cicadellidae	Hemiptera	Insecta	E	A_END	H	1	0	0	0	0	1	1
PIC-MP-T-01_PT-ET-S20	NFF Mistério da Prainha	Chão Verde superior	PIC-MP-T-01	26S	388838	4259774	BALA	1999	September	Ethylene	PT-ET-S20	8	Aphrodes hamiltoni Quartau & Borges	Aphrodes	hamiltoni		Quartau& Borges, 2003	Cicadellidae	Hemiptera	Insecta	E	A_END	H	1	0	0	0	0	1	1
PIC-MP-T-01_PT-ET-S26	NFF Mistério da Prainha	Chão Verde superior	PIC-MP-T-01	26S	388838	4259774	BALA	1999	September	Ethylene	PT-ET-S26	8	Aphrodes hamiltoni Quartau & Borges	Aphrodes	hamiltoni		Quartau& Borges, 2003	Cicadellidae	Hemiptera	Insecta	E	A_END	H	1	0	0	0	0	1	1
PIC-MP-T-01_PT-ET-S24	NFF Mistério da Prainha	Chão Verde superior	PIC-MP-T-01	26S	388838	4259774	BALA2	2010	July	Ethylene	PT-ET-S24	8	Aphrodes hamiltoni Quartau & Borges	Aphrodes	hamiltoni		Quartau& Borges, 2003	Cicadellidae	Hemiptera	Insecta	E	A_END	H	2	0	0	0	0	2	2
PIC-MP-T-01_PT-ET-S26	NFF Mistério da Prainha	Chão Verde superior	PIC-MP-T-01	26S	388838	4259774	BALA2	2010	July	Ethylene	PT-ET-S26	8	Aphrodes hamiltoni Quartau & Borges	Aphrodes	hamiltoni		Quartau& Borges, 2003	Cicadellidae	Hemiptera	Insecta	E	A_END	H	0	0	0	1	0	1	0
PIC-MP-T-01_PT-ET-S28	NFF Mistério da Prainha	Chão Verde superior	PIC-MP-T-01	26S	388838	4259774	BALA2	2010	July	Ethylene	PT-ET-S28	8	Aphrodes hamiltoni Quartau & Borges	Aphrodes	hamiltoni		Quartau& Borges, 2003	Cicadellidae	Hemiptera	Insecta	E	A_END	H	1	0	0	0	0	1	1
PIC-MP-T-01_PT-ET-S06	NFF Mistério da Prainha	Chão Verde superior	PIC-MP-T-01	26S	388838	4259774	BALA2	2010	July	Ethylene	PT-ET-S06	8	Aphrodes hamiltoni Quartau & Borges	Aphrodes	hamiltoni		Quartau& Borges, 2003	Cicadellidae	Hemiptera	Insecta	E	A_END	H	1	0	0	0	0	1	1
PIC-MP-T-01_PT-ET-S20	NFF Mistério da Prainha	Chão Verde superior	PIC-MP-T-01	26S	388838	4259774	BALA2	2010	July	Ethylene	PT-ET-S20	8	Aphrodes hamiltoni Quartau & Borges	Aphrodes	hamiltoni		Quartau& Borges, 2003	Cicadellidae	Hemiptera	Insecta	E	A_END	H	2	0	0	0	0	2	2
PIC-MP-T-01_PT-ET-S12	NFF Mistério da Prainha	Chão Verde superior	PIC-MP-T-01	26S	388838	4259774	BALA2	2010	July	Ethylene	PT-ET-S12	8	Aphrodes hamiltoni Quartau & Borges	Aphrodes	hamiltoni		Quartau& Borges, 2003	Cicadellidae	Hemiptera	Insecta	E	A_END	H	0	0	0	1	0	1	0
PIC-MP-T-01_PT-TU-S01	NFF Mistério da Prainha	Chão Verde superior	PIC-MP-T-01	26S	388838	4259774	BALA2	2010	July	Turquin	PT-TU-S01	8	Aphrodes hamiltoni Quartau & Borges	Aphrodes	hamiltoni		Quartau& Borges, 2003	Cicadellidae	Hemiptera	Insecta	E	A_END	H	1	0	0	0	0	1	1
PIC-MP-T-03_PT-TU-S07	NFF Mistério da Prainha	Chão Verde inferior	PIC-MP-T-03	26S	388946	4260693	BALA	1999	September	Turquin	PT-TU-S07	8	Aphrodes hamiltoni Quartau & Borges	Aphrodes	hamiltoni		Quartau& Borges, 2003	Cicadellidae	Hemiptera	Insecta	E	A_END	H	1	0	0	0	0	1	1
PIC-MP-T-03_PT-TU-S15	NFF Mistério da Prainha	Chão Verde inferior	PIC-MP-T-03	26S	388946	4260693	BALA	1999	September	Turquin	PT-TU-S15	8	Aphrodes hamiltoni Quartau & Borges	Aphrodes	hamiltoni		Quartau& Borges, 2003	Cicadellidae	Hemiptera	Insecta	E	A_END	H	1	0	0	0	0	1	1
PIC-MP-T-03_PT-TU-S21	NFF Mistério da Prainha	Chão Verde inferior	PIC-MP-T-03	26S	388946	4260693	BALA	1999	September	Turquin	PT-TU-S21	8	Aphrodes hamiltoni Quartau & Borges	Aphrodes	hamiltoni		Quartau& Borges, 2003	Cicadellidae	Hemiptera	Insecta	E	A_END	H	1	0	0	0	0	1	1
PIC-MP-T-03_PT-TU-S27	NFF Mistério da Prainha	Chão Verde inferior	PIC-MP-T-03	26S	388946	4260693	BALA	1999	September	Turquin	PT-TU-S27	8	Aphrodes hamiltoni Quartau & Borges	Aphrodes	hamiltoni		Quartau& Borges, 2003	Cicadellidae	Hemiptera	Insecta	E	A_END	H	1	0	0	0	0	1	1
PIC-MP-T-03_PT-TU-S29	NFF Mistério da Prainha	Chão Verde inferior	PIC-MP-T-03	26S	388946	4260693	BALA	1999	September	Turquin	PT-TU-S29	8	Aphrodes hamiltoni Quartau & Borges	Aphrodes	hamiltoni		Quartau& Borges, 2003	Cicadellidae	Hemiptera	Insecta	E	A_END	H	1	0	0	0	0	1	1
PIC-MP-T-03_PT-ET-S14	NFF Mistério da Prainha	Chão Verde inferior	PIC-MP-T-03	26S	388946	4260693	BALA	1999	September	Ethylene	PT-ET-S14	8	Aphrodes hamiltoni Quartau & Borges	Aphrodes	hamiltoni		Quartau& Borges, 2003	Cicadellidae	Hemiptera	Insecta	E	A_END	H	1	0	0	0	0	1	1
PIC-MP-T-03_PT-ET-S30	NFF Mistério da Prainha	Chão Verde inferior	PIC-MP-T-03	26S	388946	4260693	BALA	1999	September	Ethylene	PT-ET-S30	8	Aphrodes hamiltoni Quartau & Borges	Aphrodes	hamiltoni		Quartau& Borges, 2003	Cicadellidae	Hemiptera	Insecta	E	A_END	H	1	0	0	0	0	1	1
PIC-MP-T-10_PT-TU-S05	NFF Mistério da Prainha	Mistério esq esq	PIC-MP-T-10	26S	388683	4257957	BALA	1999	September	Turquin	PT-TU-S05	8	Aphrodes hamiltoni Quartau & Borges	Aphrodes	hamiltoni		Quartau& Borges, 2003	Cicadellidae	Hemiptera	Insecta	E	A_END	H	0	0	0	1	0	1	0
PIC-MP-T-10_PT-TU-S09	NFF Mistério da Prainha	Mistério esq esq	PIC-MP-T-10	26S	388683	4257957	BALA	1999	September	Turquin	PT-TU-S09	8	Aphrodes hamiltoni Quartau & Borges	Aphrodes	hamiltoni		Quartau& Borges, 2003	Cicadellidae	Hemiptera	Insecta	E	A_END	H	1	0	0	0	0	1	1
PIC-MP-T-10_PT-TU-S29	NFF Mistério da Prainha	Mistério esq esq	PIC-MP-T-10	26S	388683	4257957	BALA	1999	September	Turquin	PT-TU-S29	8	Aphrodes hamiltoni Quartau & Borges	Aphrodes	hamiltoni		Quartau& Borges, 2003	Cicadellidae	Hemiptera	Insecta	E	A_END	H	1	0	0	0	0	1	1
PIC-MP-T-10_PT-TU-S19	NFF Mistério da Prainha	Mistério esq esq	PIC-MP-T-10	26S	388683	4257957	BALA	1999	September	Turquin	PT-TU-S19	8	Aphrodes hamiltoni Quartau & Borges	Aphrodes	hamiltoni		Quartau& Borges, 2003	Cicadellidae	Hemiptera	Insecta	E	A_END	H	0	0	0	1	0	1	0
PIC-MP-T-10_PT-ET-S10	NFF Mistério da Prainha	Mistério esq esq	PIC-MP-T-10	26S	388683	4257957	BALA	1999	September	Ethylene	PT-ET-S10	8	Aphrodes hamiltoni Quartau & Borges	Aphrodes	hamiltoni		Quartau& Borges, 2003	Cicadellidae	Hemiptera	Insecta	E	A_END	H	1	0	0	0	0	1	1
PIC-MP-T-10_PT-ET-S16	NFF Mistério da Prainha	Mistério esq esq	PIC-MP-T-10	26S	388683	4257957	BALA	1999	September	Ethylene	PT-ET-S16	8	Aphrodes hamiltoni Quartau & Borges	Aphrodes	hamiltoni		Quartau& Borges, 2003	Cicadellidae	Hemiptera	Insecta	E	A_END	H	0	0	0	1	0	1	0
PIC-MP-T-10_PT-ET-S06	NFF Mistério da Prainha	Mistério esq esq	PIC-MP-T-10	26S	388683	4257957	BALA	1999	September	Ethylene	PT-ET-S06	8	Aphrodes hamiltoni Quartau & Borges	Aphrodes	hamiltoni		Quartau& Borges, 2003	Cicadellidae	Hemiptera	Insecta	E	A_END	H	0	0	0	1	0	1	0
PIC-MP-T-10_PT-ET-S12	NFF Mistério da Prainha	Mistério esq esq	PIC-MP-T-10	26S	388683	4257957	BALA2	2010	july	Ethylene	PT-ET-S12	8	Aphrodes hamiltoni Quartau & Borges	Aphrodes	hamiltoni		Quartau& Borges, 2003	Cicadellidae	Hemiptera	Insecta	E	A_END	H	0	0	0	1	0	1	0
PIC-MP-T-10_PT-ET-S10	NFF Mistério da Prainha	Mistério esq esq	PIC-MP-T-10	26S	388683	4257957	BALA2	2010	july	Ethylene	PT-ET-S10	8	Aphrodes hamiltoni Quartau & Borges	Aphrodes	hamiltoni		Quartau& Borges, 2003	Cicadellidae	Hemiptera	Insecta	E	A_END	H	1	0	0	0	0	1	1
PIC-MP-T-10_PT-ET-S14	NFF Mistério da Prainha	Mistério esq esq	PIC-MP-T-10	26S	388683	4257957	BALA2	2010	july	Ethylene	PT-ET-S14	8	Aphrodes hamiltoni Quartau & Borges	Aphrodes	hamiltoni		Quartau& Borges, 2003	Cicadellidae	Hemiptera	Insecta	E	A_END	H	0	0	0	1	0	1	0
PIC-MP-T-10_PT-TU-S11	NFF Mistério da Prainha	Mistério esq esq	PIC-MP-T-10	26S	388683	4257957	BALA2	2010	july	Turquin	PT-TU-S11	8	Aphrodes hamiltoni Quartau & Borges	Aphrodes	hamiltoni		Quartau& Borges, 2003	Cicadellidae	Hemiptera	Insecta	E	A_END	H	1	0	0	0	0	1	1
PIC-MP-T-12_PT-TU-S07	NFF Mistério da Prainha	Mistério esq dir	PIC-MP-T-12	26S	388857	4258741	BALA	1999	September	Turquin	PT-TU-S07	8	Aphrodes hamiltoni Quartau & Borges	Aphrodes	hamiltoni		Quartau& Borges, 2003	Cicadellidae	Hemiptera	Insecta	E	A_END	H	1	0	0	0	0	1	1
PIC-MP-T-12_PT-TU-S27	NFF Mistério da Prainha	Mistério esq dir	PIC-MP-T-12	26S	388857	4258741	BALA	1999	September	Turquin	PT-TU-S27	8	Aphrodes hamiltoni Quartau & Borges	Aphrodes	hamiltoni		Quartau& Borges, 2003	Cicadellidae	Hemiptera	Insecta	E	A_END	H	1	0	0	0	0	1	1
PIC-MP-T-12_PT-ET-S18	NFF Mistério da Prainha	Mistério esq dir	PIC-MP-T-12	26S	388857	4258741	BALA	1999	September	Ethylene	PT-ET-S18	8	Aphrodes hamiltoni Quartau & Borges	Aphrodes	hamiltoni		Quartau& Borges, 2003	Cicadellidae	Hemiptera	Insecta	E	A_END	H	0	0	0	1	0	1	0
PIC-MP-T-12_PT-ET-S28	NFF Mistério da Prainha	Mistério esq dir	PIC-MP-T-12	26S	388857	4258741	BALA	1999	September	Ethylene	PT-ET-S28	8	Aphrodes hamiltoni Quartau & Borges	Aphrodes	hamiltoni		Quartau& Borges, 2003	Cicadellidae	Hemiptera	Insecta	E	A_END	H	1	0	0	0	0	1	1
PIC-MP-T-14_PT-TU-S09	NFF Mistério da Prainha	Chão Verde inferior cima	PIC-MP-T-14	26S	389041	4260364	BALA	2000	July	Turquin	PT-TU-S09	8	Aphrodes hamiltoni Quartau & Borges	Aphrodes	hamiltoni		Quartau& Borges, 2003	Cicadellidae	Hemiptera	Insecta	E	A_END	H	0	0	0	1	0	1	0
PIC-MP-T-14_PT-ET-S26	NFF Mistério da Prainha	Chão Verde inferior cima	PIC-MP-T-14	26S	389041	4260364	BALA	2000	July	Ethylene	PT-ET-S26	8	Aphrodes hamiltoni Quartau & Borges	Aphrodes	hamiltoni		Quartau& Borges, 2003	Cicadellidae	Hemiptera	Insecta	E	A_END	H	0	0	0	1	0	1	0
PIC-MP-T-14_PT-ET-S04	NFF Mistério da Prainha	Chão Verde inferior cima	PIC-MP-T-14	26S	389041	4260364	BALA	2000	July	Ethylene	PT-ET-S04	8	Aphrodes hamiltoni Quartau & Borges	Aphrodes	hamiltoni		Quartau& Borges, 2003	Cicadellidae	Hemiptera	Insecta	E	A_END	H	0	0	0	1	0	1	0
PIC-MP-T-15_PT-TU-S07	NFF Mistério da Prainha	Chão Verde superior perpendicular	PIC-MP-T-15	26S	389035	4259508	BALA	2000	July	Turquin	PT-TU-S07	8	Aphrodes hamiltoni Quartau & Borges	Aphrodes	hamiltoni		Quartau& Borges, 2003	Cicadellidae	Hemiptera	Insecta	E	A_END	H	0	0	0	1	0	1	0
PIC-MP-T-15_PT-TU-S11	NFF Mistério da Prainha	Chão Verde superior perpendicular	PIC-MP-T-15	26S	389035	4259508	BALA	2000	July	Turquin	PT-TU-S11	8	Aphrodes hamiltoni Quartau & Borges	Aphrodes	hamiltoni		Quartau& Borges, 2003	Cicadellidae	Hemiptera	Insecta	E	A_END	H	0	0	0	1	0	1	0
PIC-MP-T-18_PT-TU-S17	NFF Mistério da Prainha	Mistério plateau dir	PIC-MP-T-18	26S	388485	4257668	BALA	2000	July	Turquin	PT-TU-S17	8	Aphrodes hamiltoni Quartau & Borges	Aphrodes	hamiltoni		Quartau& Borges, 2003	Cicadellidae	Hemiptera	Insecta	E	A_END	H	2	0	0	0	0	2	2
PIC-MP-T-18_PT-TU-S01	NFF Mistério da Prainha	Mistério plateau dir	PIC-MP-T-18	26S	388485	4257668	BALA	2000	July	Turquin	PT-TU-S01	8	Aphrodes hamiltoni Quartau & Borges	Aphrodes	hamiltoni		Quartau& Borges, 2003	Cicadellidae	Hemiptera	Insecta	E	A_END	H	1	0	0	0	0	1	1
PIC-MP-T-18_PT-TU-S13	NFF Mistério da Prainha	Mistério plateau dir	PIC-MP-T-18	26S	388485	4257668	BALA	2000	July	Turquin	PT-TU-S13	8	Aphrodes hamiltoni Quartau & Borges	Aphrodes	hamiltoni		Quartau& Borges, 2003	Cicadellidae	Hemiptera	Insecta	E	A_END	H	0	0	0	1	0	1	0
PIC-MP-T-18_PT-TU-S29	NFF Mistério da Prainha	Mistério plateau dir	PIC-MP-T-18	26S	388485	4257668	BALA	2000	July	Turquin	PT-TU-S29	8	Aphrodes hamiltoni Quartau & Borges	Aphrodes	hamiltoni		Quartau& Borges, 2003	Cicadellidae	Hemiptera	Insecta	E	A_END	H	0	0	0	1	0	1	0
PIC-MP-T-18_PT-ET-S22	NFF Mistério da Prainha	Mistério plateau dir	PIC-MP-T-18	26S	388485	4257668	BALA	2000	July	Ethylene	PT-ET-S22	8	Aphrodes hamiltoni Quartau & Borges	Aphrodes	hamiltoni		Quartau& Borges, 2003	Cicadellidae	Hemiptera	Insecta	E	A_END	H	1	0	0	0	0	1	1
PIC-MP-T-19_PT-TU-S17	NFF Mistério da Prainha	Mistério plateau terminal	PIC-MP-T-19	26S	389130	4258082	BALA	2000	July	Turquin	PT-TU-S17	8	Aphrodes hamiltoni Quartau & Borges	Aphrodes	hamiltoni		Quartau& Borges, 2003	Cicadellidae	Hemiptera	Insecta	E	A_END	H	1	0	0	0	0	1	1
PIC-MP-T-19_PT-TU-S23	NFF Mistério da Prainha	Mistério plateau terminal	PIC-MP-T-19	26S	389130	4258082	BALA	2000	July	Turquin	PT-TU-S23	8	Aphrodes hamiltoni Quartau & Borges	Aphrodes	hamiltoni		Quartau& Borges, 2003	Cicadellidae	Hemiptera	Insecta	E	A_END	H	0	0	0	2	0	2	0
SJG-PP-T-02_PT-TU-S25	NFF Pico Pinheiro	Pinheiro juniperal	SJG-PP-T-02	26S	408586	4278492	BALA	1999	July	Turquin	PT-TU-S25	8	Aphrodes hamiltoni Quartau & Borges	Aphrodes	hamiltoni		Quartau& Borges, 2003	Cicadellidae	Hemiptera	Insecta	E	A_END	H	1	0	0	0	0	1	1
SJG-PP-T-02_PT-TU-S09	NFF Pico Pinheiro	Pinheiro juniperal	SJG-PP-T-02	26S	408586	4278492	BALA	1999	July	Turquin	PT-TU-S09	8	Aphrodes hamiltoni Quartau & Borges	Aphrodes	hamiltoni		Quartau& Borges, 2003	Cicadellidae	Hemiptera	Insecta	E	A_END	H	1	0	0	1	0	2	1
SJG-PP-T-02_PT-TU-S11	NFF Pico Pinheiro	Pinheiro juniperal	SJG-PP-T-02	26S	408586	4278492	BALA	1999	July	Turquin	PT-TU-S11	8	Aphrodes hamiltoni Quartau & Borges	Aphrodes	hamiltoni		Quartau& Borges, 2003	Cicadellidae	Hemiptera	Insecta	E	A_END	H	1	0	0	0	0	1	1
SJG-PP-T-02_PT-TU-S23	NFF Pico Pinheiro	Pinheiro juniperal	SJG-PP-T-02	26S	408586	4278492	BALA	1999	July	Turquin	PT-TU-S23	8	Aphrodes hamiltoni Quartau & Borges	Aphrodes	hamiltoni		Quartau& Borges, 2003	Cicadellidae	Hemiptera	Insecta	E	A_END	H	1	0	0	0	0	1	1
SJG-PP-T-02_PT-TU-S13	NFF Pico Pinheiro	Pinheiro juniperal	SJG-PP-T-02	26S	408586	4278492	BALA	1999	July	Turquin	PT-TU-S13	8	Aphrodes hamiltoni Quartau & Borges	Aphrodes	hamiltoni		Quartau& Borges, 2003	Cicadellidae	Hemiptera	Insecta	E	A_END	H	1	0	0	1	0	2	1
SJG-PP-T-02_PT-TU-S01	NFF Pico Pinheiro	Pinheiro juniperal	SJG-PP-T-02	26S	408586	4278492	BALA	1999	July	Turquin	PT-TU-S01	8	Aphrodes hamiltoni Quartau & Borges	Aphrodes	hamiltoni		Quartau& Borges, 2003	Cicadellidae	Hemiptera	Insecta	E	A_END	H	0	0	0	1	0	1	0
SJG-PP-T-02_PT-ET-S24	NFF Pico Pinheiro	Pinheiro juniperal	SJG-PP-T-02	26S	408586	4278492	BALA	1999	July	Ethylene	PT-ET-S24	8	Aphrodes hamiltoni Quartau & Borges	Aphrodes	hamiltoni		Quartau& Borges, 2003	Cicadellidae	Hemiptera	Insecta	E	A_END	H	2	0	0	0	0	2	2
SJG-PP-T-02_PT-ET-S06	NFF Pico Pinheiro	Pinheiro juniperal	SJG-PP-T-02	26S	408586	4278492	BALA	1999	July	Ethylene	PT-ET-S06	8	Aphrodes hamiltoni Quartau & Borges	Aphrodes	hamiltoni		Quartau& Borges, 2003	Cicadellidae	Hemiptera	Insecta	E	A_END	H	1	0	0	0	0	1	1
SJG-PP-T-02_PT-ET-S28	NFF Pico Pinheiro	Pinheiro juniperal	SJG-PP-T-02	26S	408586	4278492	BALA	1999	July	Ethylene	PT-ET-S28	8	Aphrodes hamiltoni Quartau & Borges	Aphrodes	hamiltoni		Quartau& Borges, 2003	Cicadellidae	Hemiptera	Insecta	E	A_END	H	1	0	0	0	0	1	1
SJG-PP-T-02_PT-ET-S30	NFF Pico Pinheiro	Pinheiro juniperal	SJG-PP-T-02	26S	408586	4278492	BALA	1999	July	Ethylene	PT-ET-S30	8	Aphrodes hamiltoni Quartau & Borges	Aphrodes	hamiltoni		Quartau& Borges, 2003	Cicadellidae	Hemiptera	Insecta	E	A_END	H	3	0	0	2	0	5	3
SJG-PP-T-02_PT-ET-S18	NFF Pico Pinheiro	Pinheiro juniperal	SJG-PP-T-02	26S	408586	4278492	BALA	1999	July	Ethylene	PT-ET-S18	8	Aphrodes hamiltoni Quartau & Borges	Aphrodes	hamiltoni		Quartau& Borges, 2003	Cicadellidae	Hemiptera	Insecta	E	A_END	H	1	0	0	1	0	2	1
SJG-PP-T-02_PT-ET-S22	NFF Pico Pinheiro	Pinheiro juniperal	SJG-PP-T-02	26S	408586	4278492	BALA	1999	July	Ethylene	PT-ET-S22	8	Aphrodes hamiltoni Quartau & Borges	Aphrodes	hamiltoni		Quartau& Borges, 2003	Cicadellidae	Hemiptera	Insecta	E	A_END	H	1	0	0	0	0	1	1
SJG-PP-T-02_PT-ET-S02	NFF Pico Pinheiro	Pinheiro juniperal	SJG-PP-T-02	26S	408586	4278492	BALA	1999	July	Ethylene	PT-ET-S02	8	Aphrodes hamiltoni Quartau & Borges	Aphrodes	hamiltoni		Quartau& Borges, 2003	Cicadellidae	Hemiptera	Insecta	E	A_END	H	1	0	0	0	0	1	1
SJG-PP-T-02_PT-ET-S12	NFF Pico Pinheiro	Pinheiro juniperal	SJG-PP-T-02	26S	408586	4278492	BALA2	2010	September	Ethylene	PT-ET-S12	8	Aphrodes hamiltoni Quartau & Borges	Aphrodes	hamiltoni		Quartau& Borges, 2003	Cicadellidae	Hemiptera	Insecta	E	A_END	H	1	0	0	0	0	1	1
SJG-PP-T-02_PT-TU-S07	NFF Pico Pinheiro	Pinheiro juniperal	SJG-PP-T-02	26S	408586	4278492	BALA2	2010	September	Turquin	PT-TU-S07	8	Aphrodes hamiltoni Quartau & Borges	Aphrodes	hamiltoni		Quartau& Borges, 2003	Cicadellidae	Hemiptera	Insecta	E	A_END	H	0	0	0	1	0	1	0
SJG-PP-T-02_PT-TU-S01	NFF Pico Pinheiro	Pinheiro juniperal	SJG-PP-T-02	26S	408586	4278492	BALA2	2010	September	Turquin	PT-TU-S01	8	Aphrodes hamiltoni Quartau & Borges	Aphrodes	hamiltoni		Quartau& Borges, 2003	Cicadellidae	Hemiptera	Insecta	E	A_END	H	0	0	0	1	0	1	0
SJG-PP-T-09_PT-TU-S11	NFF Pico Pinheiro	Pinheiro erical	SJG-PP-T-09	26S	408602	4277888	BALA	2000	July	Turquin	PT-TU-S11	8	Aphrodes hamiltoni Quartau & Borges	Aphrodes	hamiltoni		Quartau& Borges, 2003	Cicadellidae	Hemiptera	Insecta	E	A_END	H	1	0	0	0	0	1	1
SJG-PP-T-09_PT-TU-S17	NFF Pico Pinheiro	Pinheiro erical	SJG-PP-T-09	26S	408602	4277888	BALA	2000	July	Turquin	PT-TU-S17	8	Aphrodes hamiltoni Quartau & Borges	Aphrodes	hamiltoni		Quartau& Borges, 2003	Cicadellidae	Hemiptera	Insecta	E	A_END	H	1	0	0	0	0	1	1
SJG-PP-T-09_PT-TU-S09	NFF Pico Pinheiro	Pinheiro erical	SJG-PP-T-09	26S	408602	4277888	BALA	2000	July	Turquin	PT-TU-S09	8	Aphrodes hamiltoni Quartau & Borges	Aphrodes	hamiltoni		Quartau& Borges, 2003	Cicadellidae	Hemiptera	Insecta	E	A_END	H	0	0	0	1	0	1	0
SJG-PP-T-09_PT-TU-S19	NFF Pico Pinheiro	Pinheiro erical	SJG-PP-T-09	26S	408602	4277888	BALA	2000	July	Turquin	PT-TU-S19	8	Aphrodes hamiltoni Quartau & Borges	Aphrodes	hamiltoni		Quartau& Borges, 2003	Cicadellidae	Hemiptera	Insecta	E	A_END	H	1	0	0	0	0	1	1
SJG-PP-T-09_PT-TU-S23	NFF Pico Pinheiro	Pinheiro erical	SJG-PP-T-09	26S	408602	4277888	BALA	2000	July	Turquin	PT-TU-S23	8	Aphrodes hamiltoni Quartau & Borges	Aphrodes	hamiltoni		Quartau& Borges, 2003	Cicadellidae	Hemiptera	Insecta	E	A_END	H	1	0	0	0	0	1	1
SJG-PP-T-09_PT-TU-S21	NFF Pico Pinheiro	Pinheiro erical	SJG-PP-T-09	26S	408602	4277888	BALA	2000	July	Turquin	PT-TU-S21	8	Aphrodes hamiltoni Quartau & Borges	Aphrodes	hamiltoni		Quartau& Borges, 2003	Cicadellidae	Hemiptera	Insecta	E	A_END	H	1	0	0	1	0	2	1
SJG-PP-T-09_PT-TU-S27	NFF Pico Pinheiro	Pinheiro erical	SJG-PP-T-09	26S	408602	4277888	BALA	2000	July	Turquin	PT-TU-S27	8	Aphrodes hamiltoni Quartau & Borges	Aphrodes	hamiltoni		Quartau& Borges, 2003	Cicadellidae	Hemiptera	Insecta	E	A_END	H	1	0	0	0	0	1	1
SJG-PP-T-09_PT-TU-S25	NFF Pico Pinheiro	Pinheiro erical	SJG-PP-T-09	26S	408602	4277888	BALA	2000	July	Turquin	PT-TU-S25	8	Aphrodes hamiltoni Quartau & Borges	Aphrodes	hamiltoni		Quartau& Borges, 2003	Cicadellidae	Hemiptera	Insecta	E	A_END	H	1	0	0	2	0	3	1
SJG-PP-T-09_PT-ET-S02	NFF Pico Pinheiro	Pinheiro erical	SJG-PP-T-09	26S	408602	4277888	BALA	2000	July	Ethylene	PT-ET-S02	8	Aphrodes hamiltoni Quartau & Borges	Aphrodes	hamiltoni		Quartau& Borges, 2003	Cicadellidae	Hemiptera	Insecta	E	A_END	H	1	0	0	0	0	1	1
SJG-PP-T-09_PT-ET-S04	NFF Pico Pinheiro	Pinheiro erical	SJG-PP-T-09	26S	408602	4277888	BALA	2000	July	Ethylene	PT-ET-S04	8	Aphrodes hamiltoni Quartau & Borges	Aphrodes	hamiltoni		Quartau& Borges, 2003	Cicadellidae	Hemiptera	Insecta	E	A_END	H	1	0	0	0	0	1	1
SJG-PP-T-09_PT-ET-S22	NFF Pico Pinheiro	Pinheiro erical	SJG-PP-T-09	26S	408602	4277888	BALA	2000	July	Ethylene	PT-ET-S22	8	Aphrodes hamiltoni Quartau & Borges	Aphrodes	hamiltoni		Quartau& Borges, 2003	Cicadellidae	Hemiptera	Insecta	E	A_END	H	0	0	0	1	0	1	0
SJG-PP-T-09_PT-ET-S20	NFF Pico Pinheiro	Pinheiro erical	SJG-PP-T-09	26S	408602	4277888	BALA	2000	July	Ethylene	PT-ET-S20	8	Aphrodes hamiltoni Quartau & Borges	Aphrodes	hamiltoni		Quartau& Borges, 2003	Cicadellidae	Hemiptera	Insecta	E	A_END	H	2	0	0	0	0	2	2
SJG-PP-T-09_PT-ET-S16	NFF Pico Pinheiro	Pinheiro erical	SJG-PP-T-09	26S	408602	4277888	BALA	2000	July	Ethylene	PT-ET-S16	8	Aphrodes hamiltoni Quartau & Borges	Aphrodes	hamiltoni		Quartau& Borges, 2003	Cicadellidae	Hemiptera	Insecta	E	A_END	H	0	0	0	1	0	1	0
SJG-PP-T-09_PT-ET-S26	NFF Pico Pinheiro	Pinheiro erical	SJG-PP-T-09	26S	408602	4277888	BALA2	2010	September	Ethylene	PT-ET-S26	8	Aphrodes hamiltoni Quartau & Borges	Aphrodes	hamiltoni		Quartau& Borges, 2003	Cicadellidae	Hemiptera	Insecta	E	A_END	H	0	0	0	1	0	1	0
SJG-PP-T-09_PT-ET-S06	NFF Pico Pinheiro	Pinheiro erical	SJG-PP-T-09	26S	408602	4277888	BALA2	2010	September	Ethylene	PT-ET-S06	8	Aphrodes hamiltoni Quartau & Borges	Aphrodes	hamiltoni		Quartau& Borges, 2003	Cicadellidae	Hemiptera	Insecta	E	A_END	H	1	0	0	0	0	1	1
SJG-PP-T-09_PT-ET-S02	NFF Pico Pinheiro	Pinheiro erical	SJG-PP-T-09	26S	408602	4277888	BALA2	2010	September	Ethylene	PT-ET-S02	8	Aphrodes hamiltoni Quartau & Borges	Aphrodes	hamiltoni		Quartau& Borges, 2003	Cicadellidae	Hemiptera	Insecta	E	A_END	H	1	0	0	0	0	1	1
SJG-PP-T-09_PT-TU-S01	NFF Pico Pinheiro	Pinheiro erical	SJG-PP-T-09	26S	408602	4277888	BALA2	2010	September	Turquin	PT-TU-S01	8	Aphrodes hamiltoni Quartau & Borges	Aphrodes	hamiltoni		Quartau& Borges, 2003	Cicadellidae	Hemiptera	Insecta	E	A_END	H	0	0	0	1	0	1	0
SJG-PP-T-09_PT-TU-S11	NFF Pico Pinheiro	Pinheiro erical	SJG-PP-T-09	26S	408602	4277888	BALA2	2010	September	Turquin	PT-TU-S11	8	Aphrodes hamiltoni Quartau & Borges	Aphrodes	hamiltoni		Quartau& Borges, 2003	Cicadellidae	Hemiptera	Insecta	E	A_END	H	1	0	0	0	0	1	1
SJG-PP-T-14_PT-TU-S01	NFF Pico Pinheiro	Pico Pinheiro superior	SJG-PP-T-14	26S	408853	4278139	PhD Clara	2004	July	Turquin	PT-TU-S01	8	Aphrodes hamiltoni Quartau & Borges	Aphrodes	hamiltoni		Quartau& Borges, 2003	Cicadellidae	Hemiptera	Insecta	E	A_END	H	0	0	0	1	0	1	0
SJG-PP-T-14_PT-ET-S04	NFF Pico Pinheiro	Pico Pinheiro superior	SJG-PP-T-14	26S	408853	4278139	PhD Clara	2004	July	Ethylene	PT-ET-S04	8	Aphrodes hamiltoni Quartau & Borges	Aphrodes	hamiltoni		Quartau& Borges, 2003	Cicadellidae	Hemiptera	Insecta	E	A_END	H	0	0	0	1	0	1	0
SJG-PP-T-14_PT-TU-S21	NFF Pico Pinheiro	Pico Pinheiro superior	SJG-PP-T-14	26S	408853	4278139	PhD Clara	2004	July	Turquin	PT-TU-S21	8	Aphrodes hamiltoni Quartau & Borges	Aphrodes	hamiltoni		Quartau& Borges, 2003	Cicadellidae	Hemiptera	Insecta	E	A_END	H	2	0	0	0	0	2	2
SJG-PP-T-14_PT-ET-S16	NFF Pico Pinheiro	Pico Pinheiro superior	SJG-PP-T-14	26S	408853	4278139	PhD Clara	2004	July	Ethylene	PT-ET-S16	8	Aphrodes hamiltoni Quartau & Borges	Aphrodes	hamiltoni		Quartau& Borges, 2003	Cicadellidae	Hemiptera	Insecta	E	A_END	H	1	0	0	1	0	2	1
SJG-PP-T-14_PT-TU-S27	NFF Pico Pinheiro	Pico Pinheiro superior	SJG-PP-T-14	26S	408853	4278139	PhD Clara	2004	July	Turquin	PT-TU-S27	8	Aphrodes hamiltoni Quartau & Borges	Aphrodes	hamiltoni		Quartau& Borges, 2003	Cicadellidae	Hemiptera	Insecta	E	A_END	H	0	0	0	1	0	1	0
SJG-PP-T-14_PT-ET-S26	NFF Pico Pinheiro	Pico Pinheiro superior	SJG-PP-T-14	26S	408853	4278139	PhD Clara	2004	July	Ethylene	PT-ET-S26	8	Aphrodes hamiltoni Quartau & Borges	Aphrodes	hamiltoni		Quartau& Borges, 2003	Cicadellidae	Hemiptera	Insecta	E	A_END	H	1	0	0	0	0	1	1
SJG-PP-T-14_PT-ET-S12	NFF Pico Pinheiro	Pico Pinheiro superior	SJG-PP-T-14	26S	408853	4278139	PhD Clara	2004	July	Ethylene	PT-ET-S12	8	Aphrodes hamiltoni Quartau & Borges	Aphrodes	hamiltoni		Quartau& Borges, 2003	Cicadellidae	Hemiptera	Insecta	E	A_END	H	1	0	0	0	0	1	1
SJG-TO-T-06_PT-TU-S13	NFF Topo	Mata Estado C	SJG-TO-T-06	26S	422089	4271756	BALA	1999	July	Turquin	PT-TU-S13	8	Aphrodes hamiltoni Quartau & Borges	Aphrodes	hamiltoni		Quartau& Borges, 2003	Cicadellidae	Hemiptera	Insecta	E	A_END	H	1	0	0	0	0	1	1
SJG-TO-T-06_PT-TU-S25	NFF Topo	Mata Estado C	SJG-TO-T-06	26S	422089	4271756	BALA	1999	July	Turquin	PT-TU-S25	8	Aphrodes hamiltoni Quartau & Borges	Aphrodes	hamiltoni		Quartau& Borges, 2003	Cicadellidae	Hemiptera	Insecta	E	A_END	H	1	0	0	1	0	2	1
SJG-TO-T-06_PT-ET-S20	NFF Topo	Mata Estado C	SJG-TO-T-06	26S	422089	4271756	BALA	1999	July	Ethylene	PT-ET-S20	8	Aphrodes hamiltoni Quartau & Borges	Aphrodes	hamiltoni		Quartau& Borges, 2003	Cicadellidae	Hemiptera	Insecta	E	A_END	H	0	0	0	1	0	1	0
SJG-TO-T-06_PT-ET-S16	NFF Topo	Mata Estado C	SJG-TO-T-06	26S	422089	4271756	BALA	1999	July	Ethylene	PT-ET-S16	8	Aphrodes hamiltoni Quartau & Borges	Aphrodes	hamiltoni		Quartau& Borges, 2003	Cicadellidae	Hemiptera	Insecta	E	A_END	H	0	0	0	1	0	1	0
SJG-TO-T-06_PT-ET-S30	NFF Topo	Mata Estado C	SJG-TO-T-06	26S	422089	4271756	BALA	1999	July	Ethylene	PT-ET-S30	8	Aphrodes hamiltoni Quartau & Borges	Aphrodes	hamiltoni		Quartau& Borges, 2003	Cicadellidae	Hemiptera	Insecta	E	A_END	H	0	0	0	1	0	1	0
SJG-TO-T-06_PT-ET-S02	NFF Topo	Mata Estado C	SJG-TO-T-06	26S	422089	4271756	BALA2	2010	September	Ethylene	PT-ET-S02	8	Aphrodes hamiltoni Quartau & Borges	Aphrodes	hamiltoni		Quartau& Borges, 2003	Cicadellidae	Hemiptera	Insecta	E	A_END	H	0	0	0	1	0	1	0
SJG-TO-T-12_PT-TU-S19	NFF Topo	Mata Estado C2	SJG-TO-T-12	26S	421857	4272031	BALA	2000	August	Turquin	PT-TU-S19	8	Aphrodes hamiltoni Quartau & Borges	Aphrodes	hamiltoni		Quartau& Borges, 2003	Cicadellidae	Hemiptera	Insecta	E	A_END	H	0	0	0	1	0	1	0
SJG-TO-T-12_PT-TU-S15	NFF Topo	Mata Estado C2	SJG-TO-T-12	26S	421857	4272031	BALA	2000	August	Turquin	PT-TU-S15	8	Aphrodes hamiltoni Quartau & Borges	Aphrodes	hamiltoni		Quartau& Borges, 2003	Cicadellidae	Hemiptera	Insecta	E	A_END	H	1	0	0	2	0	3	1
SJG-TO-T-12_PT-ET-S18	NFF Topo	Mata Estado C2	SJG-TO-T-12	26S	421857	4272031	BALA	2000	August	Ethylene	PT-ET-S18	8	Aphrodes hamiltoni Quartau & Borges	Aphrodes	hamiltoni		Quartau& Borges, 2003	Cicadellidae	Hemiptera	Insecta	E	A_END	H	2	0	0	0	0	2	2
SJG-TO-T-12_PT-ET-S24	NFF Topo	Mata Estado C2	SJG-TO-T-12	26S	421857	4272031	BALA	2000	August	Ethylene	PT-ET-S24	8	Aphrodes hamiltoni Quartau & Borges	Aphrodes	hamiltoni		Quartau& Borges, 2003	Cicadellidae	Hemiptera	Insecta	E	A_END	H	1	0	0	1	0	2	1
SJG-TO-T-12_PT-ET-S20	NFF Topo	Mata Estado C2	SJG-TO-T-12	26S	421857	4272031	BALA	2000	August	Ethylene	PT-ET-S20	8	Aphrodes hamiltoni Quartau & Borges	Aphrodes	hamiltoni		Quartau& Borges, 2003	Cicadellidae	Hemiptera	Insecta	E	A_END	H	1	0	0	0	0	1	1
SJG-TO-T-12_PT-ET-S02	NFF Topo	Mata Estado C2	SJG-TO-T-12	26S	421857	4272031	BALA	2000	August	Ethylene	PT-ET-S02	8	Aphrodes hamiltoni Quartau & Borges	Aphrodes	hamiltoni		Quartau& Borges, 2003	Cicadellidae	Hemiptera	Insecta	E	A_END	H	1	0	0	0	0	1	1
SJG-TO-T-12_PT-ET-S10	NFF Topo	Mata Estado C2	SJG-TO-T-12	26S	421857	4272031	BALA	2000	August	Ethylene	PT-ET-S10	8	Aphrodes hamiltoni Quartau & Borges	Aphrodes	hamiltoni		Quartau& Borges, 2003	Cicadellidae	Hemiptera	Insecta	E	A_END	H	0	0	0	1	0	1	0
SJG-TO-T-12_PT-ET-S28	NFF Topo	Mata Estado C2	SJG-TO-T-12	26S	421857	4272031	BALA2	2010	September	Ethylene	PT-ET-S28	8	Aphrodes hamiltoni Quartau & Borges	Aphrodes	hamiltoni		Quartau& Borges, 2003	Cicadellidae	Hemiptera	Insecta	E	A_END	H	1	0	0	0	0	1	1
SJG-TO-T-12_PT-TU-S15	NFF Topo	Mata Estado C2	SJG-TO-T-12	26S	421857	4272031	BALA2	2010	September	Turquin	PT-TU-S15	8	Aphrodes hamiltoni Quartau & Borges	Aphrodes	hamiltoni		Quartau& Borges, 2003	Cicadellidae	Hemiptera	Insecta	E	A_END	H	1	0	0	0	0	1	1
SJG-TO-T-16_PT-TU-S03	NFF Topo	Topo Euphorbia	SJG-TO-T-16	26S	422871	4271075	PhD Clara	2004	July	Turquin	PT-TU-S03	8	Aphrodes hamiltoni Quartau & Borges	Aphrodes	hamiltoni		Quartau& Borges, 2003	Cicadellidae	Hemiptera	Insecta	E	A_END	H	0	0	0	1	0	1	0
SJG-TO-T-16_PT-TU-S29	NFF Topo	Topo Euphorbia	SJG-TO-T-16	26S	422871	4271075	PhD Clara	2004	July	Turquin	PT-TU-S29	8	Aphrodes hamiltoni Quartau & Borges	Aphrodes	hamiltoni		Quartau& Borges, 2003	Cicadellidae	Hemiptera	Insecta	E	A_END	H	1	0	0	0	0	1	1
SMG-AT-T-06_PT-ET-S20	NFF Atalhada	Atalhada encosta	SMG-AT-T-06	26S	656905	4188787	BALA	1999	July	Ethylene	PT-ET-S20	8	Aphrodes hamiltoni Quartau & Borges	Aphrodes	hamiltoni		Quartau& Borges, 2003	Cicadellidae	Hemiptera	Insecta	E	A_END	H	1	0	0	0	0	1	1
SMG-AT-T-06_PT-ET-S12	NFF Atalhada	Atalhada encosta	SMG-AT-T-06	26S	656905	4188787	BALA	1999	July	Ethylene	PT-ET-S12	8	Aphrodes hamiltoni Quartau & Borges	Aphrodes	hamiltoni		Quartau& Borges, 2003	Cicadellidae	Hemiptera	Insecta	E	A_END	H	1	0	0	1	0	2	1
SMG-PV-T-01_PT-TU-S25	NFF Pico da Vara	Miradouro Tronqueira	SMG-PV-T-01	26S	659806	4184815	BALA	1999	August	Turquin	PT-TU-S25	8	Aphrodes hamiltoni Quartau & Borges	Aphrodes	hamiltoni		Quartau& Borges, 2003	Cicadellidae	Hemiptera	Insecta	E	A_END	H	1	0	0	0	0	1	1
SMG-PV-T-01_PT-TU-S23	NFF Pico da Vara	Miradouro Tronqueira	SMG-PV-T-01	26S	659806	4184815	BALA	1999	August	Turquin	PT-TU-S23	8	Aphrodes hamiltoni Quartau & Borges	Aphrodes	hamiltoni		Quartau& Borges, 2003	Cicadellidae	Hemiptera	Insecta	E	A_END	H	1	0	0	0	0	1	1
SMG-PV-T-01_PT-ET-S30	NFF Pico da Vara	Miradouro Tronqueira	SMG-PV-T-01	26S	659806	4184815	BALA	1999	August	Ethylene	PT-ET-S30	8	Aphrodes hamiltoni Quartau & Borges	Aphrodes	hamiltoni		Quartau& Borges, 2003	Cicadellidae	Hemiptera	Insecta	E	A_END	H	1	0	0	0	0	1	1
SMR-PA-T-01_PT-ET-S04	NFF Pico Alto	Pico Alto STM A	SMR-PA-T-01	26S	669927	4094384	BALA2	2010	August	Ethylene	PT-ET-S04	8	Aphrodes hamiltoni Quartau & Borges	Aphrodes	hamiltoni		Quartau& Borges, 2003	Cicadellidae	Hemiptera	Insecta	E	A_END	H	1	0	0	0	0	1	1
SMR-PA-T-01_PT-ET-S24	NFF Pico Alto	Pico Alto STM A	SMR-PA-T-01	26S	669927	4094384	BALA2	2010	August	Ethylene	PT-ET-S24	8	Aphrodes hamiltoni Quartau & Borges	Aphrodes	hamiltoni		Quartau& Borges, 2003	Cicadellidae	Hemiptera	Insecta	E	A_END	H	1	0	0	0	0	1	1
SMR-PA-T-01_PT-ET-S16	NFF Pico Alto	Pico Alto STM A	SMR-PA-T-01	26S	669927	4094384	BALA2	2010	August	Ethylene	PT-ET-S16	8	Aphrodes hamiltoni Quartau & Borges	Aphrodes	hamiltoni		Quartau& Borges, 2003	Cicadellidae	Hemiptera	Insecta	E	A_END	H	2	0	0	0	0	2	2
SMR-PA-T-01_PT-TU-S23	NFF Pico Alto	Pico Alto STM A	SMR-PA-T-01	26S	669927	4094384	BALA2	2010	August	Turquin	PT-TU-S23	8	Aphrodes hamiltoni Quartau & Borges	Aphrodes	hamiltoni		Quartau& Borges, 2003	Cicadellidae	Hemiptera	Insecta	E	A_END	H	1	0	0	1	0	2	1
SMR-PA-T-01_PT-TU-S19	NFF Pico Alto	Pico Alto STM A	SMR-PA-T-01	26S	669927	4094384	BALA2	2010	August	Turquin	PT-TU-S19	8	Aphrodes hamiltoni Quartau & Borges	Aphrodes	hamiltoni		Quartau& Borges, 2003	Cicadellidae	Hemiptera	Insecta	E	A_END	H	1	0	0	0	0	1	1
SMR-PA-T-01_PT-ET-S02	NFF Pico Alto	Pico Alto STM A	SMR-PA-T-01	26S	669927	4094384	Tese Álvaro	1997	August	Ethylene	PT-ET-S02	8	Aphrodes hamiltoni Quartau & Borges	Aphrodes	hamiltoni		Quartau& Borges, 2003	Cicadellidae	Hemiptera	Insecta	E	A_END	H	0	0	0	1	0	1	0
SMR-PA-T-01_PT-ET-S06	NFF Pico Alto	Pico Alto STM A	SMR-PA-T-01	26S	669927	4094384	Tese Álvaro	1997	August	Ethylene	PT-ET-S06	8	Aphrodes hamiltoni Quartau & Borges	Aphrodes	hamiltoni		Quartau& Borges, 2003	Cicadellidae	Hemiptera	Insecta	E	A_END	H	1	0	0	0	0	1	1
SMR-PA-T-01_PT-ET-S08	NFF Pico Alto	Pico Alto STM A	SMR-PA-T-01	26S	669927	4094384	Tese Álvaro	1997	August	Ethylene	PT-ET-S08	8	Aphrodes hamiltoni Quartau & Borges	Aphrodes	hamiltoni		Quartau& Borges, 2003	Cicadellidae	Hemiptera	Insecta	E	A_END	H	2	0	0	0	0	2	2
SMR-PA-T-02_PT-ET-S16	NFF Pico Alto	Pico Alto STM B	SMR-PA-T-02	26S	669823	4094394	Tese Álvaro	1997	August	Ethylene	PT-ET-S16	8	Aphrodes hamiltoni Quartau & Borges	Aphrodes	hamiltoni		Quartau& Borges, 2003	Cicadellidae	Hemiptera	Insecta	E	A_END	H	1	0	0	0	0	1	1
SMR-PA-T-03_PT-ET-S22	NFF Pico Alto	Paulo, Pedro e Pardal	SMR-PA-T-03	26S	670257	4094043	PhD Clara	2004	June	Ethylene	PT-ET-S22	8	Aphrodes hamiltoni Quartau & Borges	Aphrodes	hamiltoni		Quartau& Borges, 2003	Cicadellidae	Hemiptera	Insecta	E	A_END	H	0	0	0	0	1	1	0
SMR-PA-T-03_PT-TU-S25	NFF Pico Alto	Paulo, Pedro e Pardal	SMR-PA-T-03	26S	670257	4094043	PhD Clara	2004	June	Turquin	PT-TU-S25	8	Aphrodes hamiltoni Quartau & Borges	Aphrodes	hamiltoni		Quartau& Borges, 2003	Cicadellidae	Hemiptera	Insecta	E	A_END	H	0	0	0	0	1	1	0
SMR-PA-T-03_PT-TU-S27	NFF Pico Alto	Paulo, Pedro e Pardal	SMR-PA-T-03	26S	670257	4094043	BALA2	2010	August	Turquin	PT-TU-S27	8	Aphrodes hamiltoni Quartau & Borges	Aphrodes	hamiltoni		Quartau& Borges, 2003	Cicadellidae	Hemiptera	Insecta	E	A_END	H	1	0	0	0	0	1	1
SMR-PA-T-03_PT-TU-S17	NFF Pico Alto	Paulo, Pedro e Pardal	SMR-PA-T-03	26S	670257	4094043	PhD Clara	2004	June	Turquin	PT-TU-S17	8	Aphrodes hamiltoni Quartau & Borges	Aphrodes	hamiltoni		Quartau& Borges, 2003	Cicadellidae	Hemiptera	Insecta	E	A_END	H	0	0	0	1	0	1	0
SMR-PA-T-03_PT-TU-S27	NFF Pico Alto	Paulo, Pedro e Pardal	SMR-PA-T-03	26S	670257	4094043	PhD Clara	2004	June	Turquin	PT-TU-S27	8	Aphrodes hamiltoni Quartau & Borges	Aphrodes	hamiltoni		Quartau& Borges, 2003	Cicadellidae	Hemiptera	Insecta	E	A_END	H	0	0	0	1	0	1	0
SMR-PA-T-03_PT-TU-S15	NFF Pico Alto	Paulo, Pedro e Pardal	SMR-PA-T-03	26S	670257	4094043	PhD Clara	2004	June	Turquin	PT-TU-S15	8	Aphrodes hamiltoni Quartau & Borges	Aphrodes	hamiltoni		Quartau& Borges, 2003	Cicadellidae	Hemiptera	Insecta	E	A_END	H	0	0	0	1	0	1	0
SMR-PA-T-04_PT-TU-S29	NFF Pico Alto	Ana e Clara	SMR-PA-T-04	26S	670170	4094140	PhD Clara	2004	June	Turquin	PT-TU-S29	8	Aphrodes hamiltoni Quartau & Borges	Aphrodes	hamiltoni		Quartau& Borges, 2003	Cicadellidae	Hemiptera	Insecta	E	A_END	H	0	0	0	3		3	0
SMR-PA-T-04_PT-ET-S18	NFF Pico Alto	Ana e Clara	SMR-PA-T-04	26S	670170	4094140	PhD Clara	2004	June	Ethylene	PT-ET-S18	8	Aphrodes hamiltoni Quartau & Borges	Aphrodes	hamiltoni		Quartau& Borges, 2003	Cicadellidae	Hemiptera	Insecta	E	A_END	H	0	0	0	2		2	0
SMR-PA-T-04_PT-ET-S24	NFF Pico Alto	Ana e Clara	SMR-PA-T-04	26S	670170	4094140	PhD Clara	2004	June	Ethylene	PT-ET-S24	8	Aphrodes hamiltoni Quartau & Borges	Aphrodes	hamiltoni		Quartau& Borges, 2003	Cicadellidae	Hemiptera	Insecta	E	A_END	H	0	0	0	0	1	1	0
SMR-PA-T-04_PT-TU-S15	NFF Pico Alto	Ana e Clara	SMR-PA-T-04	26S	670170	4094140	PhD Clara	2004	June	Turquin	PT-TU-S15	8	Aphrodes hamiltoni Quartau & Borges	Aphrodes	hamiltoni		Quartau& Borges, 2003	Cicadellidae	Hemiptera	Insecta	E	A_END	H	0	0	0	0	1	1	0
SMR-PA-T-04_PT-ET-S08	NFF Pico Alto	Ana e Clara	SMR-PA-T-04	26S	670170	4094140	PhD Clara	2004	June	Ethylene	PT-ET-S08	8	Aphrodes hamiltoni Quartau & Borges	Aphrodes	hamiltoni		Quartau& Borges, 2003	Cicadellidae	Hemiptera	Insecta	E	A_END	H	0	0	0	0	1	1	0
SMR-PA-T-04_PT-ET-S20	NFF Pico Alto	Ana e Clara	SMR-PA-T-04	26S	670170	4094140	PhD Clara	2004	June	Ethylene	PT-ET-S20	8	Aphrodes hamiltoni Quartau & Borges	Aphrodes	hamiltoni		Quartau& Borges, 2003	Cicadellidae	Hemiptera	Insecta	E	A_END	H	0	0	0	0	1	1	0
SMR-PA-T-04_PT-TU-S11	NFF Pico Alto	Ana e Clara	SMR-PA-T-04	26S	670170	4094140	PhD Clara	2004	June	Turquin	PT-TU-S11	8	Aphrodes hamiltoni Quartau & Borges	Aphrodes	hamiltoni		Quartau& Borges, 2003	Cicadellidae	Hemiptera	Insecta	E	A_END	H	0	0	0	0	1	1	0
SMR-PA-T-04_PT-TU-S19	NFF Pico Alto	Ana e Clara	SMR-PA-T-04	26S	670170	4094140	PhD Clara	2004	June	Turquin	PT-TU-S19	8	Aphrodes hamiltoni Quartau & Borges	Aphrodes	hamiltoni		Quartau& Borges, 2003	Cicadellidae	Hemiptera	Insecta	E	A_END	H	0	0	0	0	1	1	0
SMR-PA-T-04_PT-TU-S27	NFF Pico Alto	Ana e Clara	SMR-PA-T-04	26S	670170	4094140	PhD Clara	2004	June	Turquin	PT-TU-S27	8	Aphrodes hamiltoni Quartau & Borges	Aphrodes	hamiltoni		Quartau& Borges, 2003	Cicadellidae	Hemiptera	Insecta	E	A_END	H	0	0	0	3	0	3	0
SMR-PA-T-04_PT-TU-S01	NFF Pico Alto	Ana e Clara	SMR-PA-T-04	26S	670170	4094140	PhD Clara	2004	June	Turquin	PT-TU-S01	8	Aphrodes hamiltoni Quartau & Borges	Aphrodes	hamiltoni		Quartau& Borges, 2003	Cicadellidae	Hemiptera	Insecta	E	A_END	H	0	0	0	2	0	2	0
SMR-PA-T-04_PT-ET-S16	NFF Pico Alto	Ana e Clara	SMR-PA-T-04	26S	670170	4094140	PhD Clara	2004	June	Ethylene	PT-ET-S16	8	Aphrodes hamiltoni Quartau & Borges	Aphrodes	hamiltoni		Quartau& Borges, 2003	Cicadellidae	Hemiptera	Insecta	E	A_END	H	0	0	0	1	0	1	0
SMR-PA-T-04_PT-TU-S23	NFF Pico Alto	Ana e Clara	SMR-PA-T-04	26S	670170	4094140	PhD Clara	2004	June	Turquin	PT-TU-S23	8	Aphrodes hamiltoni Quartau & Borges	Aphrodes	hamiltoni		Quartau& Borges, 2003	Cicadellidae	Hemiptera	Insecta	E	A_END	H	0	0	0	1	0	1	0
SMR-PA-T-04_PT-ET-S30	NFF Pico Alto	Ana e Clara	SMR-PA-T-04	26S	670170	4094140	PhD Clara	2004	June	Ethylene	PT-ET-S30	8	Aphrodes hamiltoni Quartau & Borges	Aphrodes	hamiltoni		Quartau& Borges, 2003	Cicadellidae	Hemiptera	Insecta	E	A_END	H	1	0	0	1	0	2	1
SMR-PA-TA02_PT-ET-S10	NFF Pico Alto	Pico Alto STM B	SMR-PA-TA02	26S	669823	4094394	Tese Álvaro	1997	June	Ethylene	PT-ET-S10	8	Aphrodes hamiltoni Quartau & Borges	Aphrodes	hamiltoni		Quartau& Borges, 2003	Cicadellidae	Hemiptera	Insecta	E	A_END	H	0	0	0	1	0	1	0
SMR-PA-TA02_PT-TU-S03	NFF Pico Alto	Pico Alto STM B	SMR-PA-TA02	26S	669823	4094394	Tese Álvaro	1997	June	Turquin	PT-TU-S03	8	Aphrodes hamiltoni Quartau & Borges	Aphrodes	hamiltoni		Quartau& Borges, 2003	Cicadellidae	Hemiptera	Insecta	E	A_END	H	1	0	0	0	0	1	1
SMR-PA-TB01_PT-TU-S05	NFF Pico Alto	Pico Alto STM A	SMR-PA-TB01	26S	669927	4094384	Tese Álvaro	1997	June	Turquin	PT-TU-S05	8	Aphrodes hamiltoni Quartau & Borges	Aphrodes	hamiltoni		Quartau& Borges, 2003	Cicadellidae	Hemiptera	Insecta	E	A_END	H	1	0	0	0	0	1	1
TER-BF-T-01_PT-TU-S15	NFF Biscoito da Ferraria	Labaçal T2 Clara	TER-BF-T-01	26S	480849	4290312	BALA	1999	June	Turquin	PT-TU-S15	8	Aphrodes hamiltoni Quartau & Borges	Aphrodes	hamiltoni		Quartau& Borges, 2003	Cicadellidae	Hemiptera	Insecta	E	A_END	H	0	0	0	1	0	1	0
TER-BF-T-01_PT-TU-S27	NFF Biscoito da Ferraria	Labaçal T2 Clara	TER-BF-T-01	26S	480849	4290312	BALA	1999	June	Turquin	PT-TU-S27	8	Aphrodes hamiltoni Quartau & Borges	Aphrodes	hamiltoni		Quartau& Borges, 2003	Cicadellidae	Hemiptera	Insecta	E	A_END	H	0	0	0	1	0	1	0
TER-BF-T-01_PT-ET-S24	NFF Biscoito da Ferraria	Labaçal T2 Clara	TER-BF-T-01	26S	480849	4290312	BALA	1999	June	Ethylene	PT-ET-S24	8	Aphrodes hamiltoni Quartau & Borges	Aphrodes	hamiltoni		Quartau& Borges, 2003	Cicadellidae	Hemiptera	Insecta	E	A_END	H	0	0	0	1	0	1	0
TER-BF-T-01_PT-ET-S18	NFF Biscoito da Ferraria	Labaçal T2 Clara	TER-BF-T-01	26S	480849	4290312	BALA2	2011	June	Ethylene	PT-ET-S18	8	Aphrodes hamiltoni Quartau & Borges	Aphrodes	hamiltoni		Quartau& Borges, 2003	Cicadellidae	Hemiptera	Insecta	E	A_END	H	0	0	0	1	0	1	0
TER-BF-T-01_PT-ET-S26	NFF Biscoito da Ferraria	Labaçal T2 Clara	TER-BF-T-01	26S	480849	4290312	BALA2	2011	June	Ethylene	PT-ET-S26	8	Aphrodes hamiltoni Quartau & Borges	Aphrodes	hamiltoni		Quartau& Borges, 2003	Cicadellidae	Hemiptera	Insecta	E	A_END	H	0	0	0	1	0	1	0
TER-BF-T-01_PT-TU-S19	NFF Biscoito da Ferraria	Labaçal T2 Clara	TER-BF-T-01	26S	480849	4290312	BALA2	2011	June	Turquin	PT-TU-S19	8	Aphrodes hamiltoni Quartau & Borges	Aphrodes	hamiltoni		Quartau& Borges, 2003	Cicadellidae	Hemiptera	Insecta	E	A_END	H	0	0	0	1	0	1	0
TER-BF-T-02_PT-ET-S08	NFF Biscoito da Ferraria	Chambre A T1 Clara	TER-BF-T-02	26S	479370	4289985	BALA	1999	June	Ethylene	PT-ET-S08	8	Aphrodes hamiltoni Quartau & Borges	Aphrodes	hamiltoni		Quartau& Borges, 2003	Cicadellidae	Hemiptera	Insecta	E	A_END	H	0	0	0	2	0	2	0
TER-BF-T-02_PT-TU-S21	NFF Biscoito da Ferraria	Chambre A T1 Clara	TER-BF-T-02	26S	479370	4289985	BALA	1999	June	Turquin	PT-TU-S21	8	Aphrodes hamiltoni Quartau & Borges	Aphrodes	hamiltoni		Quartau& Borges, 2003	Cicadellidae	Hemiptera	Insecta	E	A_END	H	0	0	0	2	0	2	0
TER-BF-T-02_PT-TU-S09	NFF Biscoito da Ferraria	Chambre A T1 Clara	TER-BF-T-02	26S	479370	4289985	BALA	1999	June	Turquin	PT-TU-S09	8	Aphrodes hamiltoni Quartau & Borges	Aphrodes	hamiltoni		Quartau& Borges, 2003	Cicadellidae	Hemiptera	Insecta	E	A_END	H	0	0	0	1	0	1	0
TER-BF-T-02_PT-TU-S23	NFF Biscoito da Ferraria	Chambre A T1 Clara	TER-BF-T-02	26S	479370	4289985	BALA	1999	June	Turquin	PT-TU-S23	8	Aphrodes hamiltoni Quartau & Borges	Aphrodes	hamiltoni		Quartau& Borges, 2003	Cicadellidae	Hemiptera	Insecta	E	A_END	H	0	0	0	3	0	3	0
TER-BF-T-02_PT-TU-S03	NFF Biscoito da Ferraria	Chambre A T1 Clara	TER-BF-T-02	26S	479370	4289985	BALA2	2011	June	Turquin	PT-TU-S03	8	Aphrodes hamiltoni Quartau & Borges	Aphrodes	hamiltoni		Quartau& Borges, 2003	Cicadellidae	Hemiptera	Insecta	E	A_END	H	0	0	0	1	0	1	0
TER-BF-T-03_PT-ET-S16	NFF Biscoito da Ferraria	Pico Alto	TER-BF-T-03	26S	481809	4289747	PhD Clara	2003	August	Ethylene	PT-ET-S16	8	Aphrodes hamiltoni Quartau & Borges	Aphrodes	hamiltoni		Quartau& Borges, 2003	Cicadellidae	Hemiptera	Insecta	E	A_END	H	0	0	0	1	0	1	0
TER-BF-T-03_PT-TU-S15	NFF Biscoito da Ferraria	Pico Alto	TER-BF-T-03	26S	481809	4289747	PhD Clara	2003	August	Turquin	PT-TU-S15	8	Aphrodes hamiltoni Quartau & Borges	Aphrodes	hamiltoni		Quartau& Borges, 2003	Cicadellidae	Hemiptera	Insecta	E	A_END	H	0	0	0	1	0	1	0
TER-BF-T-03_PT-TU-S23	NFF Biscoito da Ferraria	Pico Alto	TER-BF-T-03	26S	481809	4289747	PhD Clara	2003	August	Turquin	PT-TU-S23	8	Aphrodes hamiltoni Quartau & Borges	Aphrodes	hamiltoni		Quartau& Borges, 2003	Cicadellidae	Hemiptera	Insecta	E	A_END	H	1	0	0	0	0	1	1
TER-BF-T-03_PT-TU-S25	NFF Biscoito da Ferraria	Pico Alto	TER-BF-T-03	26S	481809	4289747	PhD Clara	2003	August	Turquin	PT-TU-S25	8	Aphrodes hamiltoni Quartau & Borges	Aphrodes	hamiltoni		Quartau& Borges, 2003	Cicadellidae	Hemiptera	Insecta	E	A_END	H	0	0	0	2	0	2	0
TER-BF-T-38_PT-TU-S03	NFF Biscoito da Ferraria	Labaçal erical	TER-BF-T-38	26S	480778	4290662	PhD Clara	2003	June	Turquin	PT-TU-S03	8	Aphrodes hamiltoni Quartau & Borges	Aphrodes	hamiltoni		Quartau& Borges, 2003	Cicadellidae	Hemiptera	Insecta	E	A_END	H	0	0	0	2	0	2	0
TER-BF-T-38_PT-ET-S04	NFF Biscoito da Ferraria	Labaçal erical	TER-BF-T-38	26S	480778	4290662	PhD Clara	2003	June	Ethylene	PT-ET-S04	8	Aphrodes hamiltoni Quartau & Borges	Aphrodes	hamiltoni		Quartau& Borges, 2003	Cicadellidae	Hemiptera	Insecta	E	A_END	H	0	0	0	1	0	1	0
TER-BF-T-38_PT-ET-S02	NFF Biscoito da Ferraria	Labaçal erical	TER-BF-T-38	26S	480778	4290662	PhD Clara	2003	June	Ethylene	PT-ET-S02	8	Aphrodes hamiltoni Quartau & Borges	Aphrodes	hamiltoni		Quartau& Borges, 2003	Cicadellidae	Hemiptera	Insecta	E	A_END	H	1	0	0	1	0	2	1
TER-BF-TP39_PT-ET-S08	NFF Biscoito da Ferraria	Chambre C	TER-BF-TP39	26S	479995	4289832	PhD Clara	2003	June	Ethylene	PT-ET-S08	8	Aphrodes hamiltoni Quartau & Borges	Aphrodes	hamiltoni		Quartau& Borges, 2003	Cicadellidae	Hemiptera	Insecta	E	A_END	H	0	0	0	1	0	1	0
TER-BF-TP39_PT-TU-S19	NFF Biscoito da Ferraria	Chambre C	TER-BF-TP39	26S	479995	4289832	PhD Clara	2003	June	Turquin	PT-TU-S19	8	Aphrodes hamiltoni Quartau & Borges	Aphrodes	hamiltoni		Quartau& Borges, 2003	Cicadellidae	Hemiptera	Insecta	E	A_END	H	0	0	0	1	0	1	0
TER-BF-TP39_PT-TU-S03	NFF Biscoito da Ferraria	Chambre C	TER-BF-TP39	26S	479995	4289832	PhD Clara	2003	June	Turquin	PT-TU-S03	8	Aphrodes hamiltoni Quartau & Borges	Aphrodes	hamiltoni		Quartau& Borges, 2003	Cicadellidae	Hemiptera	Insecta	E	A_END	H	0	0	0	1	0	1	0
TER-BF-TP41_PT-TU-S07	NFF Biscoito da Ferraria	Pico Alto nascente	TER-BF-TP41	26S	481855	4289438	PhD Clara	2003	June	Turquin	PT-TU-S07	8	Aphrodes hamiltoni Quartau & Borges	Aphrodes	hamiltoni		Quartau& Borges, 2003	Cicadellidae	Hemiptera	Insecta	E	A_END	H	0	0	0	1	0	1	0
TER-BF-TP41_PT-ET-S18	NFF Biscoito da Ferraria	Pico Alto nascente	TER-BF-TP41	26S	481855	4289438	PhD Clara	2003	June	Ethylene	PT-ET-S18	8	Aphrodes hamiltoni Quartau & Borges	Aphrodes	hamiltoni		Quartau& Borges, 2003	Cicadellidae	Hemiptera	Insecta	E	A_END	H	0	0	0	1	0	1	0
TER-BF-TP41_PT-TU-S11	NFF Biscoito da Ferraria	Pico Alto nascente	TER-BF-TP41	26S	481855	4289438	PhD Clara	2003	June	Turquin	PT-TU-S11	8	Aphrodes hamiltoni Quartau & Borges	Aphrodes	hamiltoni		Quartau& Borges, 2003	Cicadellidae	Hemiptera	Insecta	E	A_END	H	0	0	0	1	0	1	0
TER-BF-TP41_PT-TU-S25	NFF Biscoito da Ferraria	Pico Alto nascente	TER-BF-TP41	26S	481855	4289438	PhD Clara	2003	June	Turquin	PT-TU-S25	8	Aphrodes hamiltoni Quartau & Borges	Aphrodes	hamiltoni		Quartau& Borges, 2003	Cicadellidae	Hemiptera	Insecta	E	A_END	H	0	0	0	1	0	1	0
TER-BF-TP41_PT-TU-S21	NFF Biscoito da Ferraria	Pico Alto nascente	TER-BF-TP41	26S	481855	4289438	PhD Clara	2003	June	Turquin	PT-TU-S21	8	Aphrodes hamiltoni Quartau & Borges	Aphrodes	hamiltoni		Quartau& Borges, 2003	Cicadellidae	Hemiptera	Insecta	E	A_END	H	1	0	0	2	0	3	1
TER-BF-TP41_PT-TU-S29	NFF Biscoito da Ferraria	Pico Alto nascente	TER-BF-TP41	26S	481855	4289438	PhD Clara	2003	June	Turquin	PT-TU-S29	8	Aphrodes hamiltoni Quartau & Borges	Aphrodes	hamiltoni		Quartau& Borges, 2003	Cicadellidae	Hemiptera	Insecta	E	A_END	H	1	0	0	0	0	1	1
TER-BF-TP41_PT-TU-S03	NFF Biscoito da Ferraria	Pico Alto nascente	TER-BF-TP41	26S	481855	4289438	PhD Clara	2003	June	Turquin	PT-TU-S03	8	Aphrodes hamiltoni Quartau & Borges	Aphrodes	hamiltoni		Quartau& Borges, 2003	Cicadellidae	Hemiptera	Insecta	E	A_END	H	0	0	0	1	0	1	0
TER-BF-TP42_PT-ET-S14	NFF Biscoito da Ferraria	Biscoito centro	TER-BF-TP42	26S	480073	4290159	PhD Clara	2003	July	Ethylene	PT-ET-S14	8	Aphrodes hamiltoni Quartau & Borges	Aphrodes	hamiltoni		Quartau& Borges, 2003	Cicadellidae	Hemiptera	Insecta	E	A_END	H	0	0	0	1	0	1	0
TER-BF-TP42_PT-TU-S25	NFF Biscoito da Ferraria	Biscoito centro	TER-BF-TP42	26S	480073	4290159	PhD Clara	2003	July	Turquin	PT-TU-S25	8	Aphrodes hamiltoni Quartau & Borges	Aphrodes	hamiltoni		Quartau& Borges, 2003	Cicadellidae	Hemiptera	Insecta	E	A_END	H	0	0	0	1	0	1	0
TER-BF-TP42_PT-TU-S05	NFF Biscoito da Ferraria	Biscoito centro	TER-BF-TP42	26S	480073	4290159	PhD Clara	2003	July	Turquin	PT-TU-S05	8	Aphrodes hamiltoni Quartau & Borges	Aphrodes	hamiltoni		Quartau& Borges, 2003	Cicadellidae	Hemiptera	Insecta	E	A_END	H	0	0	0	1	0	1	0
TER-BF-TY01_PT-ET-S24	NFF Biscoito da Ferraria	Labaçal T2 Clara	TER-BF-TY01	26S	480849	4290312	PhD Clara	2003	June	Ethylene	PT-ET-S24	8	Aphrodes hamiltoni Quartau & Borges	Aphrodes	hamiltoni		Quartau& Borges, 2003	Cicadellidae	Hemiptera	Insecta	E	A_END	H	0	0	0	1	0	1	0
TER-BF-TY01_PT-ET-S02	NFF Biscoito da Ferraria	Labaçal T2 Clara	TER-BF-TY01	26S	480849	4290312	PhD Clara	2003	June	Ethylene	PT-ET-S02	8	Aphrodes hamiltoni Quartau & Borges	Aphrodes	hamiltoni		Quartau& Borges, 2003	Cicadellidae	Hemiptera	Insecta	E	A_END	H	0	0	0	1	0	1	0
TER-BF-TY01_PT-TU-S13	NFF Biscoito da Ferraria	Labaçal T2 Clara	TER-BF-TY01	26S	480849	4290312	PhD Clara	2003	June	Turquin	PT-TU-S13	8	Aphrodes hamiltoni Quartau & Borges	Aphrodes	hamiltoni		Quartau& Borges, 2003	Cicadellidae	Hemiptera	Insecta	E	A_END	H	1	0	0	0	0	1	1
TER-BF-TY01_PT-TU-S03	NFF Biscoito da Ferraria	Labaçal T2 Clara	TER-BF-TY01	26S	480849	4290312	PhD Clara	2003	June	Turquin	PT-TU-S03	8	Aphrodes hamiltoni Quartau & Borges	Aphrodes	hamiltoni		Quartau& Borges, 2003	Cicadellidae	Hemiptera	Insecta	E	A_END	H	0	0	0	1	0	1	0
TER-BF-TY02_PT-ET-S24	NFF Biscoito da Ferraria	Chambre A T1 Clara	TER-BF-TY02	26S	479370	4289985	PhD Clara	2003	June	Ethylene	PT-ET-S24	8	Aphrodes hamiltoni Quartau & Borges	Aphrodes	hamiltoni		Quartau& Borges, 2003	Cicadellidae	Hemiptera	Insecta	E	A_END	H	0	0	0	1	0	1	0
TER-BF-TY02_PT-TU-S29	NFF Biscoito da Ferraria	Chambre A T1 Clara	TER-BF-TY02	26S	479370	4289985	PhD Clara	2003	June	Turquin	PT-TU-S29	8	Aphrodes hamiltoni Quartau & Borges	Aphrodes	hamiltoni		Quartau& Borges, 2003	Cicadellidae	Hemiptera	Insecta	E	A_END	H	0	0	0	1	0	1	0
TER-BF-TY04_PT-ET-S14	NFF Biscoito da Ferraria	Chambre B	TER-BF-TY04	26S	479467	4289620	PhD Clara	2003	July	Ethylene	PT-ET-S14	8	Aphrodes hamiltoni Quartau & Borges	Aphrodes	hamiltoni		Quartau& Borges, 2003	Cicadellidae	Hemiptera	Insecta	E	A_END	H	0	0	0	1	0	1	0
TER-BF-TY04_PT-ET-S08	NFF Biscoito da Ferraria	Chambre B	TER-BF-TY04	26S	479467	4289620	PhD Clara	2003	July	Ethylene	PT-ET-S08	8	Aphrodes hamiltoni Quartau & Borges	Aphrodes	hamiltoni		Quartau& Borges, 2003	Cicadellidae	Hemiptera	Insecta	E	A_END	H	0	0	0	1	0	1	0
TER-BF-TY04_PT-ET-S22	NFF Biscoito da Ferraria	Chambre B	TER-BF-TY04	26S	479467	4289620	PhD Clara	2003	July	Ethylene	PT-ET-S22	8	Aphrodes hamiltoni Quartau & Borges	Aphrodes	hamiltoni		Quartau& Borges, 2003	Cicadellidae	Hemiptera	Insecta	E	A_END	H	0	0	0	1	0	1	0
TER-BF-TY04_PT-TU-S19	NFF Biscoito da Ferraria	Chambre B	TER-BF-TY04	26S	479467	4289620	PhD Clara	2003	July	Turquin	PT-TU-S19	8	Aphrodes hamiltoni Quartau & Borges	Aphrodes	hamiltoni		Quartau& Borges, 2003	Cicadellidae	Hemiptera	Insecta	E	A_END	H	0	0	0	1	0	1	0
TER-GM-T-53_PT-ET-S18	NFF Caldeira Guilherme Moniz	GM C	TER-GM-T-53	26S	481480	4284073	PhD Clara	2003	September	Ethylene	PT-ET-S18	8	Aphrodes hamiltoni Quartau & Borges	Aphrodes	hamiltoni		Quartau& Borges, 2003	Cicadellidae	Hemiptera	Insecta	E	A_END	H	1	0	0	0	0	1	1
TER-GM-T-53_PT-ET-S04	NFF Caldeira Guilherme Moniz	GM C	TER-GM-T-53	26S	481480	4284073	PhD Clara	2003	September	Ethylene	PT-ET-S04	8	Aphrodes hamiltoni Quartau & Borges	Aphrodes	hamiltoni		Quartau& Borges, 2003	Cicadellidae	Hemiptera	Insecta	E	A_END	H	1	0	0	0	0	1	1
TER-GM-T-53_PT-ET-S24	NFF Caldeira Guilherme Moniz	GM C	TER-GM-T-53	26S	481480	4284073	PhD Clara	2003	September	Ethylene	PT-ET-S24	8	Aphrodes hamiltoni Quartau & Borges	Aphrodes	hamiltoni		Quartau& Borges, 2003	Cicadellidae	Hemiptera	Insecta	E	A_END	H	8	0	0	0	0	8	8
TER-GM-T-53_PT-TU-S27	NFF Caldeira Guilherme Moniz	GM C	TER-GM-T-53	26S	481480	4284073	PhD Clara	2003	September	Turquin	PT-TU-S27	8	Aphrodes hamiltoni Quartau & Borges	Aphrodes	hamiltoni		Quartau& Borges, 2003	Cicadellidae	Hemiptera	Insecta	E	A_END	H	2	0	0	0	0	2	2
TER-GM-T-53_PT-TU-S17	NFF Caldeira Guilherme Moniz	GM C	TER-GM-T-53	26S	481480	4284073	PhD Clara	2003	September	Turquin	PT-TU-S17	8	Aphrodes hamiltoni Quartau & Borges	Aphrodes	hamiltoni		Quartau& Borges, 2003	Cicadellidae	Hemiptera	Insecta	E	A_END	H	2	0	0	0	0	2	2
TER-GM-T-53_PT-TU-S23	NFF Caldeira Guilherme Moniz	GM C	TER-GM-T-53	26S	481480	4284073	PhD Clara	2003	September	Turquin	PT-TU-S23	8	Aphrodes hamiltoni Quartau & Borges	Aphrodes	hamiltoni		Quartau& Borges, 2003	Cicadellidae	Hemiptera	Insecta	E	A_END	H	4	0	0	0	0	4	4
TER-GM-T-53_PT-TU-S05	NFF Caldeira Guilherme Moniz	GM C	TER-GM-T-53	26S	481480	4284073	PhD Clara	2003	September	Turquin	PT-TU-S05	8	Aphrodes hamiltoni Quartau & Borges	Aphrodes	hamiltoni		Quartau& Borges, 2003	Cicadellidae	Hemiptera	Insecta	E	A_END	H	1	0	0	0	0	1	1
TER-PG-T-22_PT-ET-S26	NFF Pico Galhardo	Pico X A	TER-PG-T-22	26S	479664	4287554	BALA2	2010	June	Ethylene	PT-ET-S26	8	Aphrodes hamiltoni Quartau & Borges	Aphrodes	hamiltoni		Quartau& Borges, 2003	Cicadellidae	Hemiptera	Insecta	E	A_END	H	1	0	0	0	0	1	1
TER-PG-T-22_PT-ET-S28	NFF Pico Galhardo	Pico X A	TER-PG-T-22	26S	479664	4287554	BALA2	2010	June	Ethylene	PT-ET-S28	8	Aphrodes hamiltoni Quartau & Borges	Aphrodes	hamiltoni		Quartau& Borges, 2003	Cicadellidae	Hemiptera	Insecta	E	A_END	H	0	0	0	1	0	1	0
TER-PG-T-22_PT-ET-S16	NFF Pico Galhardo	Pico X A	TER-PG-T-22	26S	479664	4287554	BALA2	2010	June	Ethylene	PT-ET-S16	8	Aphrodes hamiltoni Quartau & Borges	Aphrodes	hamiltoni		Quartau& Borges, 2003	Cicadellidae	Hemiptera	Insecta	E	A_END	H	0	0	0	1	0	1	0
TER-PG-T-22_PT-TU-S23	NFF Pico Galhardo	Pico X A	TER-PG-T-22	26S	479664	4287554	Geotermia1	2002	July	Turquin	PT-TU-S23	8	Aphrodes hamiltoni Quartau & Borges	Aphrodes	hamiltoni		Quartau& Borges, 2003	Cicadellidae	Hemiptera	Insecta	E	A_END	H	1	0	0	0	0	1	1
TER-PG-T-22_PT-ET-S12	NFF Pico Galhardo	Pico X A	TER-PG-T-22	26S	479664	4287554	Geotermia1	2002	July	Ethylene	PT-ET-S12	8	Aphrodes hamiltoni Quartau & Borges	Aphrodes	hamiltoni		Quartau& Borges, 2003	Cicadellidae	Hemiptera	Insecta	E	A_END	H	0	0	0	1	0	1	0
TER-PG-T-22_PT-ET-S18	NFF Pico Galhardo	Pico X A	TER-PG-T-22	26S	479664	4287554	Geotermia1	2002	July	Ethylene	PT-ET-S18	8	Aphrodes hamiltoni Quartau & Borges	Aphrodes	hamiltoni		Quartau& Borges, 2003	Cicadellidae	Hemiptera	Insecta	E	A_END	H	0	0	0	1	0	1	0
TER-PG-T-40_PT-ET-S18	NFF Pico Galhardo	Pico X C	TER-PG-T-40	26S	480133	4287199	PhD Clara	2003	June	Ethylene	PT-ET-S18	8	Aphrodes hamiltoni Quartau & Borges	Aphrodes	hamiltoni		Quartau& Borges, 2003	Cicadellidae	Hemiptera	Insecta	E	A_END	H	0	0	0	1	0	1	0
TER-PG-T-40_PT-TU-S17	NFF Pico Galhardo	Pico X C	TER-PG-T-40	26S	480133	4287199	PhD Clara	2003	June	Turquin	PT-TU-S17	8	Aphrodes hamiltoni Quartau & Borges	Aphrodes	hamiltoni		Quartau& Borges, 2003	Cicadellidae	Hemiptera	Insecta	E	A_END	H	0	0	0	1	0	1	0
TER-PG-T-40_PT-TU-S09	NFF Pico Galhardo	Pico X C	TER-PG-T-40	26S	480133	4287199	PhD Clara	2003	June	Turquin	PT-TU-S09	8	Aphrodes hamiltoni Quartau & Borges	Aphrodes	hamiltoni		Quartau& Borges, 2003	Cicadellidae	Hemiptera	Insecta	E	A_END	H	0	0	0	1	0	1	0
TER-PG-T-44_PT-ET-S30	NFF Pico Galhardo	Pico X D	TER-PG-T-44	26S	480217	4287486	PhD Clara	2003	July	Ethylene	PT-ET-S30	8	Aphrodes hamiltoni Quartau & Borges	Aphrodes	hamiltoni		Quartau& Borges, 2003	Cicadellidae	Hemiptera	Insecta	E	A_END	H	0	0	0	1	0	1	0
TER-PG-T-44_PT-ET-S04	NFF Pico Galhardo	Pico X D	TER-PG-T-44	26S	480217	4287486	PhD Clara	2003	July	Ethylene	PT-ET-S04	8	Aphrodes hamiltoni Quartau & Borges	Aphrodes	hamiltoni		Quartau& Borges, 2003	Cicadellidae	Hemiptera	Insecta	E	A_END	H	0	0	0	1	0	1	0
TER-PG-T-44_PT-TU-S15	NFF Pico Galhardo	Pico X D	TER-PG-T-44	26S	480217	4287486	PhD Clara	2003	July	Turquin	PT-TU-S15	8	Aphrodes hamiltoni Quartau & Borges	Aphrodes	hamiltoni		Quartau& Borges, 2003	Cicadellidae	Hemiptera	Insecta	E	A_END	H	0	0	0	1	0	1	0
TER-PG-T-44_PT-TU-S19	NFF Pico Galhardo	Pico X D	TER-PG-T-44	26S	480217	4287486	PhD Clara	2003	July	Turquin	PT-TU-S19	8	Aphrodes hamiltoni Quartau & Borges	Aphrodes	hamiltoni		Quartau& Borges, 2003	Cicadellidae	Hemiptera	Insecta	E	A_END	H	0	0	0	1	0	1	0
TER-PG-T-44_PT-TU-S13	NFF Pico Galhardo	Pico X D	TER-PG-T-44	26S	480217	4287486	PhD Clara	2003	July	Turquin	PT-TU-S13	8	Aphrodes hamiltoni Quartau & Borges	Aphrodes	hamiltoni		Quartau& Borges, 2003	Cicadellidae	Hemiptera	Insecta	E	A_END	H	0	0	0	1	0	1	0
TER-PG-T-44_PT-TU-S17	NFF Pico Galhardo	Pico X D	TER-PG-T-44	26S	480217	4287486	PhD Clara	2003	July	Turquin	PT-TU-S17	8	Aphrodes hamiltoni Quartau & Borges	Aphrodes	hamiltoni		Quartau& Borges, 2003	Cicadellidae	Hemiptera	Insecta	E	A_END	H	0	0	0	2	0	2	0
TER-SB-T-05_PT-TU-S03	NFF Serra Sta. Bárbara	Tanque	TER-SB-T-05	26S	471646	4286413	BALA	1999	June	Turquin	PT-TU-S03	8	Aphrodes hamiltoni Quartau & Borges	Aphrodes	hamiltoni		Quartau& Borges, 2003	Cicadellidae	Hemiptera	Insecta	E	A_END	H	1	0	0	0	0	1	1
TER-SB-T-05_PT-TU-S13	NFF Serra Sta. Bárbara	Tanque	TER-SB-T-05	26S	471646	4286413	BALA	1999	June	Turquin	PT-TU-S13	8	Aphrodes hamiltoni Quartau & Borges	Aphrodes	hamiltoni		Quartau& Borges, 2003	Cicadellidae	Hemiptera	Insecta	E	A_END	H	1	0	0	0	0	1	1
TER-SB-T-05_PT-TU-S23	NFF Serra Sta. Bárbara	Tanque	TER-SB-T-05	26S	471646	4286413	BALA	1999	June	Turquin	PT-TU-S23	8	Aphrodes hamiltoni Quartau & Borges	Aphrodes	hamiltoni		Quartau& Borges, 2003	Cicadellidae	Hemiptera	Insecta	E	A_END	H	1	0	0	0	0	1	1
TER-SB-T-05_PT-ET-S18	NFF Serra Sta. Bárbara	Tanque	TER-SB-T-05	26S	471646	4286413	BALA	1999	June	Ethylene	PT-ET-S18	8	Aphrodes hamiltoni Quartau & Borges	Aphrodes	hamiltoni		Quartau& Borges, 2003	Cicadellidae	Hemiptera	Insecta	E	A_END	H	0	0	0	1	0	1	0
TER-SB-T-06_PT-TU-S07	NFF Serra Sta. Bárbara	Lagoinha	TER-SB-T-06	26S	471077	4289150	BALA	1999	June	Turquin	PT-TU-S07	8	Aphrodes hamiltoni Quartau & Borges	Aphrodes	hamiltoni		Quartau& Borges, 2003	Cicadellidae	Hemiptera	Insecta	E	A_END	H	0	0	0	1	0	1	0
TER-SB-T-06_PT-ET-S04	NFF Serra Sta. Bárbara	Lagoinha	TER-SB-T-06	26S	471077	4289150	BALA	1999	June	Ethylene	PT-ET-S04	8	Aphrodes hamiltoni Quartau & Borges	Aphrodes	hamiltoni		Quartau& Borges, 2003	Cicadellidae	Hemiptera	Insecta	E	A_END	H	0	0	0	1	0	1	0
TER-SB-T-06_PT-ET-S10	NFF Serra Sta. Bárbara	Lagoinha	TER-SB-T-06	26S	471077	4289150	BALA	1999	June	Ethylene	PT-ET-S10	8	Aphrodes hamiltoni Quartau & Borges	Aphrodes	hamiltoni		Quartau& Borges, 2003	Cicadellidae	Hemiptera	Insecta	E	A_END	H	0	0	0	1	0	1	0
TER-SB-T-06_PT-ET-S08	NFF Serra Sta. Bárbara	Lagoinha	TER-SB-T-06	26S	471077	4289150	BALA2	2010	August	Ethylene	PT-ET-S08	8	Aphrodes hamiltoni Quartau & Borges	Aphrodes	hamiltoni		Quartau& Borges, 2003	Cicadellidae	Hemiptera	Insecta	E	A_END	H	1	0	0	0	0	1	1
TER-SB-T-06_PT-TU-S19	NFF Serra Sta. Bárbara	Lagoinha	TER-SB-T-06	26S	471077	4289150	BALA2	2010	August	Turquin	PT-TU-S19	8	Aphrodes hamiltoni Quartau & Borges	Aphrodes	hamiltoni		Quartau& Borges, 2003	Cicadellidae	Hemiptera	Insecta	E	A_END	H	1	0	0	0	0	1	1
TER-SB-T-06_PT-TU-S27	NFF Serra Sta. Bárbara	Lagoinha	TER-SB-T-06	26S	471077	4289150	BALA2	2010	August	Turquin	PT-TU-S27	8	Aphrodes hamiltoni Quartau & Borges	Aphrodes	hamiltoni		Quartau& Borges, 2003	Cicadellidae	Hemiptera	Insecta	E	A_END	H	1	0	0	0	0	1	1
TER-SB-T-07_PT-TU-S25	NFF Serra Sta. Bárbara	Lomba	TER-SB-T-07	26S	474700	4287863	BALA	1999	July	Turquin	PT-TU-S25	8	Aphrodes hamiltoni Quartau & Borges	Aphrodes	hamiltoni		Quartau& Borges, 2003	Cicadellidae	Hemiptera	Insecta	E	A_END	H	1	0	0	0	0	1	1
TER-SB-T-09_PT-TU-S17	NFF Serra Sta. Bárbara	Cume	TER-SB-T-09	26S	473218	4287447	BALA	1999	August	Turquin	PT-TU-S17	8	Aphrodes hamiltoni Quartau & Borges	Aphrodes	hamiltoni		Quartau& Borges, 2003	Cicadellidae	Hemiptera	Insecta	E	A_END	H	1	0	0	0	0	1	1
TER-SB-T-09_PT-TU-S21	NFF Serra Sta. Bárbara	Cume	TER-SB-T-09	26S	473218	4287447	BALA	1999	August	Turquin	PT-TU-S21	8	Aphrodes hamiltoni Quartau & Borges	Aphrodes	hamiltoni		Quartau& Borges, 2003	Cicadellidae	Hemiptera	Insecta	E	A_END	H	2	0	0	0	0	2	2
TER-SB-T-09_PT-TU-S23	NFF Serra Sta. Bárbara	Cume	TER-SB-T-09	26S	473218	4287447	BALA	1999	August	Turquin	PT-TU-S23	8	Aphrodes hamiltoni Quartau & Borges	Aphrodes	hamiltoni		Quartau& Borges, 2003	Cicadellidae	Hemiptera	Insecta	E	A_END	H	1	0	0	0	0	1	1
TER-SB-T-09_PT-ET-S10	NFF Serra Sta. Bárbara	Cume	TER-SB-T-09	26S	473218	4287447	BALA	1999	August	Ethylene	PT-ET-S10	8	Aphrodes hamiltoni Quartau & Borges	Aphrodes	hamiltoni		Quartau& Borges, 2003	Cicadellidae	Hemiptera	Insecta	E	A_END	H	1	0	0	0	0	1	1
TER-SB-T-09_PT-ET-S18	NFF Serra Sta. Bárbara	Cume	TER-SB-T-09	26S	473218	4287447	BALA	1999	August	Ethylene	PT-ET-S18	8	Aphrodes hamiltoni Quartau & Borges	Aphrodes	hamiltoni		Quartau& Borges, 2003	Cicadellidae	Hemiptera	Insecta	E	A_END	H	1	0	0	0	0	1	1
TER-SB-T-10_PT-TU-S13	NFF Serra Sta. Bárbara	Pico Pinheiro Catarina	TER-SB-T-10	26S	472868	4287382	BALA	1999	August	Turquin	PT-TU-S13	8	Aphrodes hamiltoni Quartau & Borges	Aphrodes	hamiltoni		Quartau& Borges, 2003	Cicadellidae	Hemiptera	Insecta	E	A_END	H	1	0	0	0	0	1	1
TER-SB-T-11_PT-TU-S19	NFF Serra Sta. Bárbara	Caldeira A	TER-SB-T-11	26S	472028	4288949	BALA	2001	July	Turquin	PT-TU-S19	8	Aphrodes hamiltoni Quartau & Borges	Aphrodes	hamiltoni		Quartau& Borges, 2003	Cicadellidae	Hemiptera	Insecta	E	A_END	H	0	0	0	1	0	1	0
TER-SB-T-11_PT-TU-S25	NFF Serra Sta. Bárbara	Caldeira A	TER-SB-T-11	26S	472028	4288949	BALA2	2010	September	Turquin	PT-TU-S25	8	Aphrodes hamiltoni Quartau & Borges	Aphrodes	hamiltoni		Quartau& Borges, 2003	Cicadellidae	Hemiptera	Insecta	E	A_END	H	0	0	0	2	0	2	0
TER-SB-T-12_PT-ET-S10	NFF Serra Sta. Bárbara	Pico Rachado	TER-SB-T-12	26S	473143	4290063	BALA	2001	July	Ethylene	PT-ET-S10	8	Aphrodes hamiltoni Quartau & Borges	Aphrodes	hamiltoni		Quartau& Borges, 2003	Cicadellidae	Hemiptera	Insecta	E	A_END	H	1	0	0	0	0	1	1
TER-SB-T-12_PT-ET-S08	NFF Serra Sta. Bárbara	Pico Rachado	TER-SB-T-12	26S	473143	4290063	BALA	2001	July	Ethylene	PT-ET-S08	8	Aphrodes hamiltoni Quartau & Borges	Aphrodes	hamiltoni		Quartau& Borges, 2003	Cicadellidae	Hemiptera	Insecta	E	A_END	H	1	0	0	0	0	1	1
TER-SB-T-43_PT-ET-S14	NFF Serra Sta. Bárbara	Ribeira dos Gatos	TER-SB-T-43	26S	472674	4290653	PhD Clara	2003	July	Ethylene	PT-ET-S14	8	Aphrodes hamiltoni Quartau & Borges	Aphrodes	hamiltoni		Quartau& Borges, 2003	Cicadellidae	Hemiptera	Insecta	E	A_END	H	0	0	0	1	0	1	0
TER-SB-T-43_PT-TU-S09	NFF Serra Sta. Bárbara	Ribeira dos Gatos	TER-SB-T-43	26S	472674	4290653	PhD Clara	2003	July	Turquin	PT-TU-S09	8	Aphrodes hamiltoni Quartau & Borges	Aphrodes	hamiltoni		Quartau& Borges, 2003	Cicadellidae	Hemiptera	Insecta	E	A_END	H	0	0	0	1	0	1	0
TER-SB-T-43_PT-TU-S29	NFF Serra Sta. Bárbara	Ribeira dos Gatos	TER-SB-T-43	26S	472674	4290653	PhD Clara	2003	July	Turquin	PT-TU-S29	8	Aphrodes hamiltoni Quartau & Borges	Aphrodes	hamiltoni		Quartau& Borges, 2003	Cicadellidae	Hemiptera	Insecta	E	A_END	H	1	0	0	2	0	3	1
TER-SB-T-43_PT-TU-S13	NFF Serra Sta. Bárbara	Ribeira dos Gatos	TER-SB-T-43	26S	472674	4290653	PhD Clara	2003	July	Turquin	PT-TU-S13	8	Aphrodes hamiltoni Quartau & Borges	Aphrodes	hamiltoni		Quartau& Borges, 2003	Cicadellidae	Hemiptera	Insecta	E	A_END	H	0	0	0	1	0	1	0
TER-SB-T-46_PT-TU-S19	NFF Serra Sta. Bárbara	Mistérios Negros erical	TER-SB-T-46	26S	475348	4287229	PhD Clara	2003	July	Turquin	PT-TU-S19	8	Aphrodes hamiltoni Quartau & Borges	Aphrodes	hamiltoni		Quartau& Borges, 2003	Cicadellidae	Hemiptera	Insecta	E	A_END	H	0	0	0	1	0	1	0
TER-SB-T-46_PT-ET-S08	NFF Serra Sta. Bárbara	Mistérios Negros erical	TER-SB-T-46	26S	475348	4287229	PhD Clara	2003	July	Ethylene	PT-ET-S08	8	Aphrodes hamiltoni Quartau & Borges	Aphrodes	hamiltoni		Quartau& Borges, 2003	Cicadellidae	Hemiptera	Insecta	E	A_END	H	0	0	0	1	0	1	0
TER-SB-T-46_PT-ET-S06	NFF Serra Sta. Bárbara	Mistérios Negros erical	TER-SB-T-46	26S	475348	4287229	PhD Clara	2003	July	Ethylene	PT-ET-S06	8	Aphrodes hamiltoni Quartau & Borges	Aphrodes	hamiltoni		Quartau& Borges, 2003	Cicadellidae	Hemiptera	Insecta	E	A_END	H	0	0	0	1	0	1	0
TER-SB-T-46_PT-TU-S07	NFF Serra Sta. Bárbara	Mistérios Negros erical	TER-SB-T-46	26S	475348	4287229	PhD Clara	2003	July	Turquin	PT-TU-S07	8	Aphrodes hamiltoni Quartau & Borges	Aphrodes	hamiltoni		Quartau& Borges, 2003	Cicadellidae	Hemiptera	Insecta	E	A_END	H	0	0	0	1	0	1	0
TER-SB-T-46_PT-TU-S09	NFF Serra Sta. Bárbara	Mistérios Negros erical	TER-SB-T-46	26S	475348	4287229	PhD Clara	2003	July	Turquin	PT-TU-S09	8	Aphrodes hamiltoni Quartau & Borges	Aphrodes	hamiltoni		Quartau& Borges, 2003	Cicadellidae	Hemiptera	Insecta	E	A_END	H	0	0	0	1	0	1	0
TER-SB-T-46_PT-ET-S28	NFF Serra Sta. Bárbara	Mistérios Negros erical	TER-SB-T-46	26S	475348	4287229	PhD Clara	2003	July	Ethylene	PT-ET-S28	8	Aphrodes hamiltoni Quartau & Borges	Aphrodes	hamiltoni		Quartau& Borges, 2003	Cicadellidae	Hemiptera	Insecta	E	A_END	H	1	0	0	0	0	1	1
TER-SB-T-47_PT-ET-S12	NFF Serra Sta. Bárbara	Caldeira B	TER-SB-T-47	26S	472890	4287587	PhD Clara	2003	August	Ethylene	PT-ET-S12	8	Aphrodes hamiltoni Quartau & Borges	Aphrodes	hamiltoni		Quartau& Borges, 2003	Cicadellidae	Hemiptera	Insecta	E	A_END	H	1	0	0	0	0	1	1
TER-SB-T-47_PT-ET-S02	NFF Serra Sta. Bárbara	Caldeira B	TER-SB-T-47	26S	472890	4287587	PhD Clara	2003	August	Ethylene	PT-ET-S02	8	Aphrodes hamiltoni Quartau & Borges	Aphrodes	hamiltoni		Quartau& Borges, 2003	Cicadellidae	Hemiptera	Insecta	E	A_END	H	0	0	0	1	0	1	0
TER-SB-T-47_PT-ET-S10	NFF Serra Sta. Bárbara	Caldeira B	TER-SB-T-47	26S	472890	4287587	PhD Clara	2003	August	Ethylene	PT-ET-S10	8	Aphrodes hamiltoni Quartau & Borges	Aphrodes	hamiltoni		Quartau& Borges, 2003	Cicadellidae	Hemiptera	Insecta	E	A_END	H	0	0	0	1	0	1	0
TER-SB-T-47_PT-ET-S08	NFF Serra Sta. Bárbara	Caldeira B	TER-SB-T-47	26S	472890	4287587	PhD Clara	2003	August	Ethylene	PT-ET-S08	8	Aphrodes hamiltoni Quartau & Borges	Aphrodes	hamiltoni		Quartau& Borges, 2003	Cicadellidae	Hemiptera	Insecta	E	A_END	H	1	0	0	0	0	1	1
TER-SB-T-47_PT-TU-S03	NFF Serra Sta. Bárbara	Caldeira B	TER-SB-T-47	26S	472890	4287587	PhD Clara	2003	August	Turquin	PT-TU-S03	8	Aphrodes hamiltoni Quartau & Borges	Aphrodes	hamiltoni		Quartau& Borges, 2003	Cicadellidae	Hemiptera	Insecta	E	A_END	H	0	0	0	1	0	1	0
TER-SB-T-57_PT-TU-S27	NFF Serra Sta. Bárbara	Pico Rachado B	TER-SB-T-57	26S	473187	4289870	PhD Clara	2003	July	Turquin	PT-TU-S27	8	Aphrodes hamiltoni Quartau & Borges	Aphrodes	hamiltoni		Quartau& Borges, 2003	Cicadellidae	Hemiptera	Insecta	E	A_END	H	0	0	0	1	0	1	0
TER-SB-T-57_PT-TU-S29	NFF Serra Sta. Bárbara	Pico Rachado B	TER-SB-T-57	26S	473187	4289870	PhD Clara	2003	July	Turquin	PT-TU-S29	8	Aphrodes hamiltoni Quartau & Borges	Aphrodes	hamiltoni		Quartau& Borges, 2003	Cicadellidae	Hemiptera	Insecta	E	A_END	H	2	0	0	0	0	2	2
TER-SB-T-57_PT-TU-S03	NFF Serra Sta. Bárbara	Pico Rachado B	TER-SB-T-57	26S	473187	4289870	PhD Clara	2003	July	Turquin	PT-TU-S03	8	Aphrodes hamiltoni Quartau & Borges	Aphrodes	hamiltoni		Quartau& Borges, 2003	Cicadellidae	Hemiptera	Insecta	E	A_END	H	0	0	0	2	0	2	0
TER-SB-T-57_PT-ET-S02	NFF Serra Sta. Bárbara	Pico Rachado B	TER-SB-T-57	26S	473187	4289870	PhD Clara	2003	July	Ethylene	PT-ET-S02	8	Aphrodes hamiltoni Quartau & Borges	Aphrodes	hamiltoni		Quartau& Borges, 2003	Cicadellidae	Hemiptera	Insecta	E	A_END	H	0	0	0	1	0	1	0
TER-SB-T-57_PT-ET-S24	NFF Serra Sta. Bárbara	Pico Rachado B	TER-SB-T-57	26S	473187	4289870	PhD Clara	2003	July	Ethylene	PT-ET-S24	8	Aphrodes hamiltoni Quartau & Borges	Aphrodes	hamiltoni		Quartau& Borges, 2003	Cicadellidae	Hemiptera	Insecta	E	A_END	H	0	0	0	1	0	1	0
TER-SB-T-57_PT-ET-S14	NFF Serra Sta. Bárbara	Pico Rachado B	TER-SB-T-57	26S	473187	4289870	PhD Clara	2003	July	Ethylene	PT-ET-S14	8	Aphrodes hamiltoni Quartau & Borges	Aphrodes	hamiltoni		Quartau& Borges, 2003	Cicadellidae	Hemiptera	Insecta	E	A_END	H	1	0	0	0	0	1	1
TER-SB-T-57_PT-TU-S21	NFF Serra Sta. Bárbara	Pico Rachado B	TER-SB-T-57	26S	473187	4289870	PhD Clara	2003	July	Turquin	PT-TU-S21	8	Aphrodes hamiltoni Quartau & Borges	Aphrodes	hamiltoni		Quartau& Borges, 2003	Cicadellidae	Hemiptera	Insecta	E	A_END	H	0	0	0	1	0	1	0
TER-SB-T-57_PT-ET-S12	NFF Serra Sta. Bárbara	Pico Rachado B	TER-SB-T-57	26S	473187	4289870	PhD Clara	2003	July	Ethylene	PT-ET-S12	8	Aphrodes hamiltoni Quartau & Borges	Aphrodes	hamiltoni		Quartau& Borges, 2003	Cicadellidae	Hemiptera	Insecta	E	A_END	H	0	0	0	1	0	1	0
TER-SB-T-57_PT-TU-S17	NFF Serra Sta. Bárbara	Pico Rachado B	TER-SB-T-57	26S	473187	4289870	PhD Clara	2003	July	Turquin	PT-TU-S17	8	Aphrodes hamiltoni Quartau & Borges	Aphrodes	hamiltoni		Quartau& Borges, 2003	Cicadellidae	Hemiptera	Insecta	E	A_END	H	0	0	0	1	0	1	0
TER-SB-T-57_PT-TU-S25	NFF Serra Sta. Bárbara	Pico Rachado B	TER-SB-T-57	26S	473187	4289870	PhD Clara	2003	July	Turquin	PT-TU-S25	8	Aphrodes hamiltoni Quartau & Borges	Aphrodes	hamiltoni		Quartau& Borges, 2003	Cicadellidae	Hemiptera	Insecta	E	A_END	H	0	0	0	2	0	2	0
TER-SB-T-57_PT-TU-S05	NFF Serra Sta. Bárbara	Pico Rachado B	TER-SB-T-57	26S	473187	4289870	PhD Clara	2003	July	Turquin	PT-TU-S05	8	Aphrodes hamiltoni Quartau & Borges	Aphrodes	hamiltoni		Quartau& Borges, 2003	Cicadellidae	Hemiptera	Insecta	E	A_END	H	0	0	0	1	0	1	0
TER-SB-T-57_PT-TU-S09	NFF Serra Sta. Bárbara	Pico Rachado B	TER-SB-T-57	26S	473187	4289870	PhD Clara	2003	July	Turquin	PT-TU-S09	8	Aphrodes hamiltoni Quartau & Borges	Aphrodes	hamiltoni		Quartau& Borges, 2003	Cicadellidae	Hemiptera	Insecta	E	A_END	H	0	0	0	1	0	1	0
TER-SB-TE45_PT-ET-S08	NFF Serra Sta. Bárbara	Lomba centro	TER-SB-TE45	26S	474383	4287815	PhD Clara	2003	August	Ethylene	PT-ET-S08	8	Aphrodes hamiltoni Quartau & Borges	Aphrodes	hamiltoni		Quartau& Borges, 2003	Cicadellidae	Hemiptera	Insecta	E	A_END	H	0	0	0	1	0	1	0
TER-SB-TE45_PT-ET-S30	NFF Serra Sta. Bárbara	Lomba centro	TER-SB-TE45	26S	474383	4287815	PhD Clara	2003	August	Ethylene	PT-ET-S30	8	Aphrodes hamiltoni Quartau & Borges	Aphrodes	hamiltoni		Quartau& Borges, 2003	Cicadellidae	Hemiptera	Insecta	E	A_END	H	0	0	0	1	0	1	0
TER-SB-TE45_PT-TU-S13	NFF Serra Sta. Bárbara	Lomba centro	TER-SB-TE45	26S	474383	4287815	PhD Clara	2003	August	Turquin	PT-TU-S13	8	Aphrodes hamiltoni Quartau & Borges	Aphrodes	hamiltoni		Quartau& Borges, 2003	Cicadellidae	Hemiptera	Insecta	E	A_END	H	1	0	0	1	0	2	1
TER-SB-TE45_PT-TU-S15	NFF Serra Sta. Bárbara	Lomba centro	TER-SB-TE45	26S	474383	4287815	PhD Clara	2003	August	Turquin	PT-TU-S15	8	Aphrodes hamiltoni Quartau & Borges	Aphrodes	hamiltoni		Quartau& Borges, 2003	Cicadellidae	Hemiptera	Insecta	E	A_END	H	1	0	0	0	0	1	1
TER-SB-TE45_PT-TU-S31	NFF Serra Sta. Bárbara	Lomba centro	TER-SB-TE45	26S	474383	4287815	PhD Clara	2003	July	Turquin	PT-TU-S31	8	Aphrodes hamiltoni Quartau & Borges	Aphrodes	hamiltoni		Quartau& Borges, 2003	Cicadellidae	Hemiptera	Insecta	E	A_END	H	1	0	0	0	0	1	1
TER-SB-TE45_PT-ET-S46	NFF Serra Sta. Bárbara	Lomba centro	TER-SB-TE45	26S	474383	4287815	PhD Clara	2003	July	Ethylene	PT-ET-S46	8	Aphrodes hamiltoni Quartau & Borges	Aphrodes	hamiltoni		Quartau& Borges, 2003	Cicadellidae	Hemiptera	Insecta	E	A_END	H	2	0	0	0	0	2	2
TER-SB-TE45_PT-TU-S43	NFF Serra Sta. Bárbara	Lomba centro	TER-SB-TE45	26S	474383	4287815	PhD Clara	2003	July	Turquin	PT-TU-S43	8	Aphrodes hamiltoni Quartau & Borges	Aphrodes	hamiltoni		Quartau& Borges, 2003	Cicadellidae	Hemiptera	Insecta	E	A_END	H	0	0	0	1	0	1	0
TER-SB-TE45_PT-TU-S37	NFF Serra Sta. Bárbara	Lomba centro	TER-SB-TE45	26S	474383	4287815	PhD Clara	2003	July	Turquin	PT-TU-S37	8	Aphrodes hamiltoni Quartau & Borges	Aphrodes	hamiltoni		Quartau& Borges, 2003	Cicadellidae	Hemiptera	Insecta	E	A_END	H	1	0	0	0	0	1	1
TER-SB-TE45_PT-ET-S58	NFF Serra Sta. Bárbara	Lomba centro	TER-SB-TE45	26S	474383	4287815	PhD Clara	2003	July	Ethylene	PT-ET-S58	8	Aphrodes hamiltoni Quartau & Borges	Aphrodes	hamiltoni		Quartau& Borges, 2003	Cicadellidae	Hemiptera	Insecta	E	A_END	H	0	0	0	1	0	1	0
TER-SB-TE45_PT-ET-S34	NFF Serra Sta. Bárbara	Lomba centro	TER-SB-TE45	26S	474383	4287815	PhD Clara	2003	July	Ethylene	PT-ET-S34	8	Aphrodes hamiltoni Quartau & Borges	Aphrodes	hamiltoni		Quartau& Borges, 2003	Cicadellidae	Hemiptera	Insecta	E	A_END	H	0	0	0	1	0	1	0
TER-SB-TE45_PT-TU-S47	NFF Serra Sta. Bárbara	Lomba centro	TER-SB-TE45	26S	474383	4287815	PhD Clara	2003	July	Turquin	PT-TU-S47	8	Aphrodes hamiltoni Quartau & Borges	Aphrodes	hamiltoni		Quartau& Borges, 2003	Cicadellidae	Hemiptera	Insecta	E	A_END	H	0	0	0	1	0	1	0
TER-SB-TE48_PT-ET-S54	NFF Serra Sta. Bárbara	Lagoinha B	TER-SB-TE48	26S	471172	4289221	PhD Clara	2003	July	Ethylene	PT-ET-S54	8	Aphrodes hamiltoni Quartau & Borges	Aphrodes	hamiltoni		Quartau& Borges, 2003	Cicadellidae	Hemiptera	Insecta	E	A_END	H	1	0	0	0	0	1	1
TER-SB-TE48_PT-ET-S38	NFF Serra Sta. Bárbara	Lagoinha B	TER-SB-TE48	26S	471172	4289221	PhD Clara	2003	July	Ethylene	PT-ET-S38	8	Aphrodes hamiltoni Quartau & Borges	Aphrodes	hamiltoni		Quartau& Borges, 2003	Cicadellidae	Hemiptera	Insecta	E	A_END	H	1	0	0	0	0	1	1
TER-SB-TE48_PT-TU-S09	NFF Serra Sta. Bárbara	Lagoinha B	TER-SB-TE48	26S	471172	4289221	PhD Clara	2003	July	Turquin	PT-TU-S09	8	Aphrodes hamiltoni Quartau & Borges	Aphrodes	hamiltoni		Quartau& Borges, 2003	Cicadellidae	Hemiptera	Insecta	E	A_END	H	1	0	0	0	0	1	1
TER-SB-TE48_PT-ET-S08	NFF Serra Sta. Bárbara	Lagoinha B	TER-SB-TE48	26S	471172	4289221	PhD Clara	2003	July	Ethylene	PT-ET-S08	8	Aphrodes hamiltoni Quartau & Borges	Aphrodes	hamiltoni		Quartau& Borges, 2003	Cicadellidae	Hemiptera	Insecta	E	A_END	H	1	0	0	0	0	1	1
TER-SB-TE48_PT-TU-S05	NFF Serra Sta. Bárbara	Lagoinha B	TER-SB-TE48	26S	471172	4289221	PhD Clara	2003	July	Turquin	PT-TU-S05	8	Aphrodes hamiltoni Quartau & Borges	Aphrodes	hamiltoni		Quartau& Borges, 2003	Cicadellidae	Hemiptera	Insecta	E	A_END	H	1	0	0	0	0	1	1
TER-SB-TE48_PT-ET-S44	NFF Serra Sta. Bárbara	Lagoinha B	TER-SB-TE48	26S	471172	4289221	PhD Clara	2003	July	Ethylene	PT-ET-S44	8	Aphrodes hamiltoni Quartau & Borges	Aphrodes	hamiltoni		Quartau& Borges, 2003	Cicadellidae	Hemiptera	Insecta	E	A_END	H	1	0	0	0	0	1	1
TER-SB-TE48_PT-TU-S07	NFF Serra Sta. Bárbara	Lagoinha B	TER-SB-TE48	26S	471172	4289221	PhD Clara	2003	July	Turquin	PT-TU-S07	8	Aphrodes hamiltoni Quartau & Borges	Aphrodes	hamiltoni		Quartau& Borges, 2003	Cicadellidae	Hemiptera	Insecta	E	A_END	H	1	0	0	0	0	1	1
TER-SB-TE48_PT-TU-S59	NFF Serra Sta. Bárbara	Lagoinha B	TER-SB-TE48	26S	471172	4289221	PhD Clara	2003	July	Turquin	PT-TU-S59	8	Aphrodes hamiltoni Quartau & Borges	Aphrodes	hamiltoni		Quartau& Borges, 2003	Cicadellidae	Hemiptera	Insecta	E	A_END	H	0	0	0	2	0	2	0
TER-SB-TE49_PT-ET-S10	NFF Serra Sta. Bárbara	Pinheiro B	TER-SB-TE49	26S	472292	428880	PhD Clara	2003	July	Ethylene	PT-ET-S10	8	Aphrodes hamiltoni Quartau & Borges	Aphrodes	hamiltoni		Quartau& Borges, 2003	Cicadellidae	Hemiptera	Insecta	E	A_END	H	0	0	0	1	0	1	0
TER-SB-TE49_PT-ET-S20	NFF Serra Sta. Bárbara	Pinheiro B	TER-SB-TE49	26S	472292	428880	PhD Clara	2003	July	Ethylene	PT-ET-S20	8	Aphrodes hamiltoni Quartau & Borges	Aphrodes	hamiltoni		Quartau& Borges, 2003	Cicadellidae	Hemiptera	Insecta	E	A_END	H	1	0	0	0	0	1	1
TER-SB-TE49_PT-TU-S59	NFF Serra Sta. Bárbara	Pinheiro B	TER-SB-TE49	26S	472292	428880	PhD Clara	2003	July	Turquin	PT-TU-S59	8	Aphrodes hamiltoni Quartau & Borges	Aphrodes	hamiltoni		Quartau& Borges, 2003	Cicadellidae	Hemiptera	Insecta	E	A_END	H	0	0	0	1	0	1	0
TER-SB-TE49_PT-ET-S18	NFF Serra Sta. Bárbara	Pinheiro B	TER-SB-TE49	26S	472292	428880	PhD Clara	2003	July	Ethylene	PT-ET-S18	8	Aphrodes hamiltoni Quartau & Borges	Aphrodes	hamiltoni		Quartau& Borges, 2003	Cicadellidae	Hemiptera	Insecta	E	A_END	H	0	0	0	1	0	1	0
TER-SB-TE50_PT-ET-S30	NFF Serra Sta. Bárbara	Pinheiro Rachado	TER-SB-TE50	26S	472428	4289636	PhD Clara	2003	September	Ethylene	PT-ET-S30	8	Aphrodes hamiltoni Quartau & Borges	Aphrodes	hamiltoni		Quartau& Borges, 2003	Cicadellidae	Hemiptera	Insecta	E	A_END	H	1	0	0	0	0	1	1
TER-SB-TE50_PT-ET-S12	NFF Serra Sta. Bárbara	Pinheiro Rachado	TER-SB-TE50	26S	472428	4289636	PhD Clara	2003	September	Ethylene	PT-ET-S12	8	Aphrodes hamiltoni Quartau & Borges	Aphrodes	hamiltoni		Quartau& Borges, 2003	Cicadellidae	Hemiptera	Insecta	E	A_END	H	1	0	0	0	0	1	1
TER-SB-TE50_PT-TU-S07	NFF Serra Sta. Bárbara	Pinheiro Rachado	TER-SB-TE50	26S	472428	4289636	PhD Clara	2003	September	Turquin	PT-TU-S07	8	Aphrodes hamiltoni Quartau & Borges	Aphrodes	hamiltoni		Quartau& Borges, 2003	Cicadellidae	Hemiptera	Insecta	E	A_END	H	1	0	0	0	0	1	1
TER-SB-TE50_PT-TU-S05	NFF Serra Sta. Bárbara	Pinheiro Rachado	TER-SB-TE50	26S	472428	4289636	PhD Clara	2003	September	Turquin	PT-TU-S05	8	Aphrodes hamiltoni Quartau & Borges	Aphrodes	hamiltoni		Quartau& Borges, 2003	Cicadellidae	Hemiptera	Insecta	E	A_END	H	2	0	0	1	0	3	2
TER-SB-TE50_PT-TU-S11	NFF Serra Sta. Bárbara	Pinheiro Rachado	TER-SB-TE50	26S	472428	4289636	PhD Clara	2003	September	Turquin	PT-TU-S11	8	Aphrodes hamiltoni Quartau & Borges	Aphrodes	hamiltoni		Quartau& Borges, 2003	Cicadellidae	Hemiptera	Insecta	E	A_END	H	0	0	0	1	0	1	0
TER-SB-TE50_PT-TU-S13	NFF Serra Sta. Bárbara	Pinheiro Rachado	TER-SB-TE50	26S	472428	4289636	PhD Clara	2003	September	Turquin	PT-TU-S13	8	Aphrodes hamiltoni Quartau & Borges	Aphrodes	hamiltoni		Quartau& Borges, 2003	Cicadellidae	Hemiptera	Insecta	E	A_END	H	0	0	0	2	0	2	0
TER-SB-TE50_PT-TU-S29	NFF Serra Sta. Bárbara	Pinheiro Rachado	TER-SB-TE50	26S	472428	4289636	PhD Clara	2003	September	Turquin	PT-TU-S29	8	Aphrodes hamiltoni Quartau & Borges	Aphrodes	hamiltoni		Quartau& Borges, 2003	Cicadellidae	Hemiptera	Insecta	E	A_END	H	2	0	0	0	0	2	2
TER-SB-TE50_PT-TU-S23	NFF Serra Sta. Bárbara	Pinheiro Rachado	TER-SB-TE50	26S	472428	4289636	PhD Clara	2003	September	Turquin	PT-TU-S23	8	Aphrodes hamiltoni Quartau & Borges	Aphrodes	hamiltoni		Quartau& Borges, 2003	Cicadellidae	Hemiptera	Insecta	E	A_END	H	1	0	0	0	0	1	1
TER-SB-TE50_PT-ET-S58	NFF Serra Sta. Bárbara	Pinheiro Rachado	TER-SB-TE50	26S	472428	4289636	PhD Clara	2003	August	Ethylene	PT-ET-S58	8	Aphrodes hamiltoni Quartau & Borges	Aphrodes	hamiltoni		Quartau& Borges, 2003	Cicadellidae	Hemiptera	Insecta	E	A_END	H	1	0	0	0	0	1	1
TER-SB-TE50_PT-ET-S52	NFF Serra Sta. Bárbara	Pinheiro Rachado	TER-SB-TE50	26S	472428	4289636	PhD Clara	2003	August	Ethylene	PT-ET-S52	8	Aphrodes hamiltoni Quartau & Borges	Aphrodes	hamiltoni		Quartau& Borges, 2003	Cicadellidae	Hemiptera	Insecta	E	A_END	H	1	0	0	0	0	1	1
TER-SB-TE50_PT-TU-S43	NFF Serra Sta. Bárbara	Pinheiro Rachado	TER-SB-TE50	26S	472428	4289636	PhD Clara	2003	August	Turquin	PT-TU-S43	8	Aphrodes hamiltoni Quartau & Borges	Aphrodes	hamiltoni		Quartau& Borges, 2003	Cicadellidae	Hemiptera	Insecta	E	A_END	H	0	0	0	1	0	1	0
TER-SB-TE50_PT-ET-S50	NFF Serra Sta. Bárbara	Pinheiro Rachado	TER-SB-TE50	26S	472428	4289636	PhD Clara	2003	August	Ethylene	PT-ET-S50	8	Aphrodes hamiltoni Quartau & Borges	Aphrodes	hamiltoni		Quartau& Borges, 2003	Cicadellidae	Hemiptera	Insecta	E	A_END	H	1	0	0	0	0	1	1
TER-SB-TE50_PT-TU-S51	NFF Serra Sta. Bárbara	Pinheiro Rachado	TER-SB-TE50	26S	472428	4289636	PhD Clara	2003	August	Turquin	PT-TU-S51	8	Aphrodes hamiltoni Quartau & Borges	Aphrodes	hamiltoni		Quartau& Borges, 2003	Cicadellidae	Hemiptera	Insecta	E	A_END	H	1	0	0	0	0	1	1
TER-SB-TY05_PT-TU-S11	NFF Serra Sta. Bárbara	Tanque	TER-SB-TY05	26S	471646	4286413	PhD Clara	2003	June	Turquin	PT-TU-S11	8	Aphrodes hamiltoni Quartau & Borges	Aphrodes	hamiltoni		Quartau& Borges, 2003	Cicadellidae	Hemiptera	Insecta	E	A_END	H	0	0	0	1	0	1	0
TER-SB-TY05_PT-TU-S23	NFF Serra Sta. Bárbara	Tanque	TER-SB-TY05	26S	471646	4286413	PhD Clara	2003	June	Turquin	PT-TU-S23	8	Aphrodes hamiltoni Quartau & Borges	Aphrodes	hamiltoni		Quartau& Borges, 2003	Cicadellidae	Hemiptera	Insecta	E	A_END	H	0	0	0	1	0	1	0
TER-SB-TY05_PT-TU-S25	NFF Serra Sta. Bárbara	Tanque	TER-SB-TY05	26S	471646	4286413	PhD Clara	2003	June	Turquin	PT-TU-S25	8	Aphrodes hamiltoni Quartau & Borges	Aphrodes	hamiltoni		Quartau& Borges, 2003	Cicadellidae	Hemiptera	Insecta	E	A_END	H	0	0	0	1	0	1	0
TER-SB-TY05_B-JU-S06	NFF Serra Sta. Bárbara	Tanque	TER-SB-TY05	26S	471646	4286413	PhD Clara	2003	June	Juniperus	B-JU-S06	8	Aphrodes hamiltoni Quartau & Borges	Aphrodes	hamiltoni		Quartau& Borges, 2003	Cicadellidae	Hemiptera	Insecta	E	A_END	H	1	0	0	0	0	1	1
TER-SB-TY06_PT-ET-S30	NFF Serra Sta. Bárbara	Lagoinha	TER-SB-TY06	26S	471077	4289150	PhD Clara	2003	June	Ethylene	PT-ET-S30	8	Aphrodes hamiltoni Quartau & Borges	Aphrodes	hamiltoni		Quartau& Borges, 2003	Cicadellidae	Hemiptera	Insecta	E	A_END	H	0	0	0	1	0	1	0
TER-SB-TY06_PT-TU-S27	NFF Serra Sta. Bárbara	Lagoinha	TER-SB-TY06	26S	471077	4289150	PhD Clara	2003	June	Turquin	PT-TU-S27	8	Aphrodes hamiltoni Quartau & Borges	Aphrodes	hamiltoni		Quartau& Borges, 2003	Cicadellidae	Hemiptera	Insecta	E	A_END	H	0	0	0	1	0	1	0
TER-SB-TY06_PT-ET-S02	NFF Serra Sta. Bárbara	Lagoinha	TER-SB-TY06	26S	471077	4289150	PhD Clara	2003	June	Ethylene	PT-ET-S02	8	Aphrodes hamiltoni Quartau & Borges	Aphrodes	hamiltoni		Quartau& Borges, 2003	Cicadellidae	Hemiptera	Insecta	E	A_END	H	0	0	0	1	0	1	0
TER-SB-TY06_PT-TU-S25	NFF Serra Sta. Bárbara	Lagoinha	TER-SB-TY06	26S	471077	4289150	PhD Clara	2003	June	Turquin	PT-TU-S25	8	Aphrodes hamiltoni Quartau & Borges	Aphrodes	hamiltoni		Quartau& Borges, 2003	Cicadellidae	Hemiptera	Insecta	E	A_END	H	0	0	0	1	0	1	0
TER-SB-TY11_PT-ET-S14	NFF Serra Sta. Bárbara	Caldeira A	TER-SB-TY11	26S	472028	4288949	PhD Clara	2003	July	Ethylene	PT-ET-S14	8	Aphrodes hamiltoni Quartau & Borges	Aphrodes	hamiltoni		Quartau& Borges, 2003	Cicadellidae	Hemiptera	Insecta	E	A_END	H	1	0	0	0	0	1	1
TER-SB-TY11_PT-TU-S03	NFF Serra Sta. Bárbara	Caldeira A	TER-SB-TY11	26S	472028	4288949	PhD Clara	2003	July	Turquin	PT-TU-S03	8	Aphrodes hamiltoni Quartau & Borges	Aphrodes	hamiltoni		Quartau& Borges, 2003	Cicadellidae	Hemiptera	Insecta	E	A_END	H	0	0	0	1	0	1	0
TER-SB-TY11_PT-ET-S22	NFF Serra Sta. Bárbara	Caldeira A	TER-SB-TY11	26S	472028	4288949	PhD Clara	2003	July	Ethylene	PT-ET-S22	8	Aphrodes hamiltoni Quartau & Borges	Aphrodes	hamiltoni		Quartau& Borges, 2003	Cicadellidae	Hemiptera	Insecta	E	A_END	H	2	0	0	0	0	2	2
TER-SB-TY11_PT-TU-S21	NFF Serra Sta. Bárbara	Caldeira A	TER-SB-TY11	26S	472028	4288949	PhD Clara	2003	July	Turquin	PT-TU-S21	8	Aphrodes hamiltoni Quartau & Borges	Aphrodes	hamiltoni		Quartau& Borges, 2003	Cicadellidae	Hemiptera	Insecta	E	A_END	H	0	0	0	2	0	2	0
TER-TB-T-15_PT-TU-S07	NFF Terra Brava	Terra Brava A	TER-TB-T-15	26S	482438	4287412	BALA	1999	August	Turquin	PT-TU-S07	8	Aphrodes hamiltoni Quartau & Borges	Aphrodes	hamiltoni		Quartau& Borges, 2003	Cicadellidae	Hemiptera	Insecta	E	A_END	H	3	0	0	0	0	3	3
TER-TB-T-15_PT-TU-S03	NFF Terra Brava	Terra Brava A	TER-TB-T-15	26S	482438	4287412	BALA	1999	August	Turquin	PT-TU-S03	8	Aphrodes hamiltoni Quartau & Borges	Aphrodes	hamiltoni		Quartau& Borges, 2003	Cicadellidae	Hemiptera	Insecta	E	A_END	H	1	0	0	0	0	1	1
TER-TB-T-15_PT-TU-S23	NFF Terra Brava	Terra Brava A	TER-TB-T-15	26S	482438	4287412	BALA	1999	August	Turquin	PT-TU-S23	8	Aphrodes hamiltoni Quartau & Borges	Aphrodes	hamiltoni		Quartau& Borges, 2003	Cicadellidae	Hemiptera	Insecta	E	A_END	H	0	0	0	1	0	1	0
TER-TB-T-15_PT-ET-S22	NFF Terra Brava	Terra Brava A	TER-TB-T-15	26S	482438	4287412	BALA	1999	August	Ethylene	PT-ET-S22	8	Aphrodes hamiltoni Quartau & Borges	Aphrodes	hamiltoni		Quartau& Borges, 2003	Cicadellidae	Hemiptera	Insecta	E	A_END	H	1	0	0	0	0	1	1
TER-TB-T-15_PT-ET-S12	NFF Terra Brava	Terra Brava A	TER-TB-T-15	26S	482438	4287412	BALA	1999	August	Ethylene	PT-ET-S12	8	Aphrodes hamiltoni Quartau & Borges	Aphrodes	hamiltoni		Quartau& Borges, 2003	Cicadellidae	Hemiptera	Insecta	E	A_END	H	1	0	0	0	0	1	1
TER-TB-T-15_PT-ET-S12	NFF Terra Brava	Terra Brava A	TER-TB-T-15	26S	482438	4287412	BALA2	2010	July	Ethylene	PT-ET-S12	8	Aphrodes hamiltoni Quartau & Borges	Aphrodes	hamiltoni		Quartau& Borges, 2003	Cicadellidae	Hemiptera	Insecta	E	A_END	H	0	0	0	1	0	1	0
TER-TB-T-16_PT-TU-S29	NFF Terra Brava	Terra Brava C	TER-TB-T-16	26S	482076	4287536	BALA	1999	May	Turquin	PT-TU-S29	8	Aphrodes hamiltoni Quartau & Borges	Aphrodes	hamiltoni		Quartau& Borges, 2003	Cicadellidae	Hemiptera	Insecta	E	A_END	H	0	0	0	1	0	1	0
TER-TB-T-16_PT-ET-S22	NFF Terra Brava	Terra Brava C	TER-TB-T-16	26S	482076	4287536	BALA	1999	May	Ethylene	PT-ET-S22	8	Aphrodes hamiltoni Quartau & Borges	Aphrodes	hamiltoni		Quartau& Borges, 2003	Cicadellidae	Hemiptera	Insecta	E	A_END	H	0	0	0	1	0	1	0
TER-TB-T-18_PT-TU-S03	NFF Terra Brava	Terra Brava B	TER-TB-T-18	26S	482792	4287094	BALA2	2010	August	Turquin	PT-TU-S03	8	Aphrodes hamiltoni Quartau & Borges	Aphrodes	hamiltoni		Quartau& Borges, 2003	Cicadellidae	Hemiptera	Insecta	E	A_END	H	1	0	0	0	0	1	1
TER-TB-T-18_PT-ET-S14	NFF Terra Brava	Terra Brava B	TER-TB-T-18	26S	482792	4287094	Geotermia1	2002	June	Ethylene	PT-ET-S14	8	Aphrodes hamiltoni Quartau & Borges	Aphrodes	hamiltoni		Quartau& Borges, 2003	Cicadellidae	Hemiptera	Insecta	E	A_END	H	0	0	0	1	0	1	0
TER-TB-T-34_PT-TU-S25	NFF Terra Brava	Erical pastagem A	TER-TB-T-34	26S	482470	4287736	Geotermia1	2002	July	Turquin	PT-TU-S25	8	Aphrodes hamiltoni Quartau & Borges	Aphrodes	hamiltoni		Quartau& Borges, 2003	Cicadellidae	Hemiptera	Insecta	E	A_END	H	1	0	0	0	0	1	1
TER-TB-T-34_PT-TU-S27	NFF Terra Brava	Erical pastagem A	TER-TB-T-34	26S	482470	4287736	Geotermia1	2002	July	Turquin	PT-TU-S27	8	Aphrodes hamiltoni Quartau & Borges	Aphrodes	hamiltoni		Quartau& Borges, 2003	Cicadellidae	Hemiptera	Insecta	E	A_END	H	1	0	0	0	0	1	1
TER-TB-T-34_PT-ET-S24	NFF Terra Brava	Erical pastagem A	TER-TB-T-34	26S	482470	4287736	Geotermia1	2002	July	Ethylene	PT-ET-S24	8	Aphrodes hamiltoni Quartau & Borges	Aphrodes	hamiltoni		Quartau& Borges, 2003	Cicadellidae	Hemiptera	Insecta	E	A_END	H	1	0	0	0	0	1	1
TER-TB-T-34_PT-ET-S26	NFF Terra Brava	Erical pastagem A	TER-TB-T-34	26S	482470	4287736	Geotermia1	2002	July	Ethylene	PT-ET-S26	8	Aphrodes hamiltoni Quartau & Borges	Aphrodes	hamiltoni		Quartau& Borges, 2003	Cicadellidae	Hemiptera	Insecta	E	A_END	H	1	0	0	0	0	1	1
TER-TB-T-34_PT-ET-S30	NFF Terra Brava	Erical pastagem A	TER-TB-T-34	26S	482470	4287736	Geotermia1	2002	July	Ethylene	PT-ET-S30	8	Aphrodes hamiltoni Quartau & Borges	Aphrodes	hamiltoni		Quartau& Borges, 2003	Cicadellidae	Hemiptera	Insecta	E	A_END	H	1	0	0	0	0	1	1
TER-TB-T-51_PT-ET-S18	NFF Terra Brava	Terra Brava D	TER-TB-T-51	26S	482031	4287697	PhD Clara	2003	September	Ethylene	PT-ET-S18	8	Aphrodes hamiltoni Quartau & Borges	Aphrodes	hamiltoni		Quartau& Borges, 2003	Cicadellidae	Hemiptera	Insecta	E	A_END	H	1	0	0	0	0	1	1
TER-TB-T-51_PT-ET-S06	NFF Terra Brava	Terra Brava D	TER-TB-T-51	26S	482031	4287697	PhD Clara	2003	September	Ethylene	PT-ET-S06	8	Aphrodes hamiltoni Quartau & Borges	Aphrodes	hamiltoni		Quartau& Borges, 2003	Cicadellidae	Hemiptera	Insecta	E	A_END	H	1	0	0	0	0	1	1
TER-TB-T-51_PT-ET-S14	NFF Terra Brava	Terra Brava D	TER-TB-T-51	26S	482031	4287697	PhD Clara	2003	September	Ethylene	PT-ET-S14	8	Aphrodes hamiltoni Quartau & Borges	Aphrodes	hamiltoni		Quartau& Borges, 2003	Cicadellidae	Hemiptera	Insecta	E	A_END	H	0	0	0	1	0	1	0
TER-TB-T-51_PT-TU-S11	NFF Terra Brava	Terra Brava D	TER-TB-T-51	26S	482031	4287697	PhD Clara	2003	September	Turquin	PT-TU-S11	8	Aphrodes hamiltoni Quartau & Borges	Aphrodes	hamiltoni		Quartau& Borges, 2003	Cicadellidae	Hemiptera	Insecta	E	A_END	H	1	0	0	0	0	1	1
TER-TB-T-51_PT-TU-S27	NFF Terra Brava	Terra Brava D	TER-TB-T-51	26S	482031	4287697	PhD Clara	2003	September	Turquin	PT-TU-S27	8	Aphrodes hamiltoni Quartau & Borges	Aphrodes	hamiltoni		Quartau& Borges, 2003	Cicadellidae	Hemiptera	Insecta	E	A_END	H	1	0	0	0	0	1	1
TER-TB-T-51_PT-TU-S03	NFF Terra Brava	Terra Brava D	TER-TB-T-51	26S	482031	4287697	PhD Clara	2003	September	Turquin	PT-TU-S03	8	Aphrodes hamiltoni Quartau & Borges	Aphrodes	hamiltoni		Quartau& Borges, 2003	Cicadellidae	Hemiptera	Insecta	E	A_END	H	2	0	0	0	0	2	2
TER-TB-T-52_PT-ET-S22	NFF Terra Brava	Terra Brava E	TER-TB-T-52	26S	481925	4287419	PhD Clara	2003	September	Ethylene	PT-ET-S22	8	Aphrodes hamiltoni Quartau & Borges	Aphrodes	hamiltoni		Quartau& Borges, 2003	Cicadellidae	Hemiptera	Insecta	E	A_END	H	1	0	0	0	0	1	1
TER-TB-T-52_PT-ET-S18	NFF Terra Brava	Terra Brava E	TER-TB-T-52	26S	481925	4287419	PhD Clara	2003	September	Ethylene	PT-ET-S18	8	Aphrodes hamiltoni Quartau & Borges	Aphrodes	hamiltoni		Quartau& Borges, 2003	Cicadellidae	Hemiptera	Insecta	E	A_END	H	1	0	0	0	0	1	1
TER-TB-T-52_PT-ET-S14	NFF Terra Brava	Terra Brava E	TER-TB-T-52	26S	481925	4287419	PhD Clara	2003	September	Ethylene	PT-ET-S14	8	Aphrodes hamiltoni Quartau & Borges	Aphrodes	hamiltoni		Quartau& Borges, 2003	Cicadellidae	Hemiptera	Insecta	E	A_END	H	2	0	0	0	0	2	2
TER-TB-T-52_PT-ET-S20	NFF Terra Brava	Terra Brava E	TER-TB-T-52	26S	481925	4287419	PhD Clara	2003	September	Ethylene	PT-ET-S20	8	Aphrodes hamiltoni Quartau & Borges	Aphrodes	hamiltoni		Quartau& Borges, 2003	Cicadellidae	Hemiptera	Insecta	E	A_END	H	1	0	0	0	0	1	1
TER-TB-T-52_PT-ET-S06	NFF Terra Brava	Terra Brava E	TER-TB-T-52	26S	481925	4287419	PhD Clara	2003	September	Ethylene	PT-ET-S06	8	Aphrodes hamiltoni Quartau & Borges	Aphrodes	hamiltoni		Quartau& Borges, 2003	Cicadellidae	Hemiptera	Insecta	E	A_END	H	1	0	0	0	0	1	1
TER-TB-T-52_PT-TU-S13	NFF Terra Brava	Terra Brava E	TER-TB-T-52	26S	481925	4287419	PhD Clara	2003	September	Turquin	PT-TU-S13	8	Aphrodes hamiltoni Quartau & Borges	Aphrodes	hamiltoni		Quartau& Borges, 2003	Cicadellidae	Hemiptera	Insecta	E	A_END	H	0	0	0	1	0	1	0
TER-TB-T-52_PT-TU-S19	NFF Terra Brava	Terra Brava E	TER-TB-T-52	26S	481925	4287419	PhD Clara	2003	September	Turquin	PT-TU-S19	8	Aphrodes hamiltoni Quartau & Borges	Aphrodes	hamiltoni		Quartau& Borges, 2003	Cicadellidae	Hemiptera	Insecta	E	A_END	H	1	0	0	0	0	1	1
TER-TB-T-52_PT-TU-S03	NFF Terra Brava	Terra Brava E	TER-TB-T-52	26S	481925	4287419	PhD Clara	2003	September	Turquin	PT-TU-S03	8	Aphrodes hamiltoni Quartau & Borges	Aphrodes	hamiltoni		Quartau& Borges, 2003	Cicadellidae	Hemiptera	Insecta	E	A_END	H	2	0	0	0	0	2	2
TER-TB-T-52_PT-TU-S29	NFF Terra Brava	Terra Brava E	TER-TB-T-52	26S	481925	4287419	PhD Clara	2003	September	Turquin	PT-TU-S29	8	Aphrodes hamiltoni Quartau & Borges	Aphrodes	hamiltoni		Quartau& Borges, 2003	Cicadellidae	Hemiptera	Insecta	E	A_END	H	1	0	0	0	0	1	1
TER-TB-T-52_PT-TU-S25	NFF Terra Brava	Terra Brava E	TER-TB-T-52	26S	481925	4287419	PhD Clara	2003	September	Turquin	PT-TU-S25	8	Aphrodes hamiltoni Quartau & Borges	Aphrodes	hamiltoni		Quartau& Borges, 2003	Cicadellidae	Hemiptera	Insecta	E	A_END	H	1	0	0	0	0	1	1
TER-TB-T-55_PT-ET-S30	NFF Terra Brava	Terra Brava F	TER-TB-T-55	26S	481968	4287021	PhD Clara	2003	September	Ethylene	PT-ET-S30	8	Aphrodes hamiltoni Quartau & Borges	Aphrodes	hamiltoni		Quartau& Borges, 2003	Cicadellidae	Hemiptera	Insecta	E	A_END	H	1	0	0	0	0	1	1
TER-TB-T-55_PT-ET-S04	NFF Terra Brava	Terra Brava F	TER-TB-T-55	26S	481968	4287021	PhD Clara	2003	September	Ethylene	PT-ET-S04	8	Aphrodes hamiltoni Quartau & Borges	Aphrodes	hamiltoni		Quartau& Borges, 2003	Cicadellidae	Hemiptera	Insecta	E	A_END	H	1	0	0	0	0	1	1
TER-TB-T-55_PT-ET-S16	NFF Terra Brava	Terra Brava F	TER-TB-T-55	26S	481968	4287021	PhD Clara	2003	September	Ethylene	PT-ET-S16	8	Aphrodes hamiltoni Quartau & Borges	Aphrodes	hamiltoni		Quartau& Borges, 2003	Cicadellidae	Hemiptera	Insecta	E	A_END	H	1	0	0	1	0	2	1
TER-TB-T-55_PT-TU-S07	NFF Terra Brava	Terra Brava F	TER-TB-T-55	26S	481968	4287021	PhD Clara	2003	September	Turquin	PT-TU-S07	8	Aphrodes hamiltoni Quartau & Borges	Aphrodes	hamiltoni		Quartau& Borges, 2003	Cicadellidae	Hemiptera	Insecta	E	A_END	H	1	0	0	1	0	2	1
TER-TB-T-55_PT-TU-S03	NFF Terra Brava	Terra Brava F	TER-TB-T-55	26S	481968	4287021	PhD Clara	2003	September	Turquin	PT-TU-S03	8	Aphrodes hamiltoni Quartau & Borges	Aphrodes	hamiltoni		Quartau& Borges, 2003	Cicadellidae	Hemiptera	Insecta	E	A_END	H	1	0	0	0	0	1	1
TER-TB-T-55_PT-TU-S11	NFF Terra Brava	Terra Brava F	TER-TB-T-55	26S	481968	4287021	PhD Clara	2003	September	Turquin	PT-TU-S11	8	Aphrodes hamiltoni Quartau & Borges	Aphrodes	hamiltoni		Quartau& Borges, 2003	Cicadellidae	Hemiptera	Insecta	E	A_END	H	1	0	0	0	0	1	1
TER-TB-T-56_PT-ET-S02	NFF Terra Brava	Terra Brava G	TER-TB-T-56	26S	482723	4287501	PhD Clara	2003	September	Ethylene	PT-ET-S02	8	Aphrodes hamiltoni Quartau & Borges	Aphrodes	hamiltoni		Quartau& Borges, 2003	Cicadellidae	Hemiptera	Insecta	E	A_END	H	1	0	0	0	0	1	1
TER-TB-T-56_PT-TU-S17	NFF Terra Brava	Terra Brava G	TER-TB-T-56	26S	482723	4287501	PhD Clara	2003	September	Turquin	PT-TU-S17	8	Aphrodes hamiltoni Quartau & Borges	Aphrodes	hamiltoni		Quartau& Borges, 2003	Cicadellidae	Hemiptera	Insecta	E	A_END	H	1	0	0	0	0	1	1
TER-TB-T-56_PT-TU-S27	NFF Terra Brava	Terra Brava G	TER-TB-T-56	26S	482723	4287501	PhD Clara	2003	September	Turquin	PT-TU-S27	8	Aphrodes hamiltoni Quartau & Borges	Aphrodes	hamiltoni		Quartau& Borges, 2003	Cicadellidae	Hemiptera	Insecta	E	A_END	H	2	0	0	0	0	2	2
TER-TB-T-56_PT-TU-S11	NFF Terra Brava	Terra Brava G	TER-TB-T-56	26S	482723	4287501	PhD Clara	2003	September	Turquin	PT-TU-S11	8	Aphrodes hamiltoni Quartau & Borges	Aphrodes	hamiltoni		Quartau& Borges, 2003	Cicadellidae	Hemiptera	Insecta	E	A_END	H	0	0	0	1	0	1	0
TER-TB-T-56_PT-TU-S07	NFF Terra Brava	Terra Brava G	TER-TB-T-56	26S	482723	4287501	PhD Clara	2003	September	Turquin	PT-TU-S07	8	Aphrodes hamiltoni Quartau & Borges	Aphrodes	hamiltoni		Quartau& Borges, 2003	Cicadellidae	Hemiptera	Insecta	E	A_END	H	2	0	0	0	0	2	2
TER-TB-TY15_PT-ET-S20	NFF Terra Brava	Terra Brava A	TER-TB-TY15	26S	482438	4287412	PhD Clara	2003	August	Ethylene	PT-ET-S20	8	Aphrodes hamiltoni Quartau & Borges	Aphrodes	hamiltoni		Quartau& Borges, 2003	Cicadellidae	Hemiptera	Insecta	E	A_END	H	0	0	0	1	0	1	0
TER-TB-TY15_PT-ET-S24	NFF Terra Brava	Terra Brava A	TER-TB-TY15	26S	482438	4287412	PhD Clara	2003	August	Ethylene	PT-ET-S24	8	Aphrodes hamiltoni Quartau & Borges	Aphrodes	hamiltoni		Quartau& Borges, 2003	Cicadellidae	Hemiptera	Insecta	E	A_END	H	2	0	0	0	0	2	2
TER-TB-TY15_PT-TU-S09	NFF Terra Brava	Terra Brava A	TER-TB-TY15	26S	482438	4287412	PhD Clara	2003	August	Turquin	PT-TU-S09	8	Aphrodes hamiltoni Quartau & Borges	Aphrodes	hamiltoni		Quartau& Borges, 2003	Cicadellidae	Hemiptera	Insecta	E	A_END	H	0	0	0	1	0	1	0
TER-TB-TY15_PT-TU-S23	NFF Terra Brava	Terra Brava A	TER-TB-TY15	26S	482438	4287412	PhD Clara	2003	August	Turquin	PT-TU-S23	8	Aphrodes hamiltoni Quartau & Borges	Aphrodes	hamiltoni		Quartau& Borges, 2003	Cicadellidae	Hemiptera	Insecta	E	A_END	H	0	0	0	1	0	1	0
TER-TB-TY15_PT-TU-S07	NFF Terra Brava	Terra Brava A	TER-TB-TY15	26S	482438	4287412	PhD Clara	2003	August	Turquin	PT-TU-S07	8	Aphrodes hamiltoni Quartau & Borges	Aphrodes	hamiltoni		Quartau& Borges, 2003	Cicadellidae	Hemiptera	Insecta	E	A_END	H	1	0	0	1	0	2	1
TER-TB-TY15_PT-TU-S21	NFF Terra Brava	Terra Brava A	TER-TB-TY15	26S	482438	4287412	PhD Clara	2003	August	Turquin	PT-TU-S21	8	Aphrodes hamiltoni Quartau & Borges	Aphrodes	hamiltoni		Quartau& Borges, 2003	Cicadellidae	Hemiptera	Insecta	E	A_END	H	1	0	0	0	0	1	1
TER-TB-TY15_PT-ET-S06	NFF Terra Brava	Terra Brava A	TER-TB-TY15	26S	482438	4287412	PhD Clara	2003	August	Ethylene	PT-ET-S06	8	Aphrodes hamiltoni Quartau & Borges	Aphrodes	hamiltoni		Quartau& Borges, 2003	Cicadellidae	Hemiptera	Insecta	E	A_END	H	1	0	0	0	0	1	1
TER-TB-TY16_PT-ET-S24	NFF Terra Brava	Terra Brava C	TER-TB-TY16	26S	482076	4287536	PhD Clara	2003	June	Ethylene	PT-ET-S24	8	Aphrodes hamiltoni Quartau & Borges	Aphrodes	hamiltoni		Quartau& Borges, 2003	Cicadellidae	Hemiptera	Insecta	E	A_END	H	0	0	0	1	0	1	0
TER-TB-TY16_PT-TU-S15	NFF Terra Brava	Terra Brava C	TER-TB-TY16	26S	482076	4287536	PhD Clara	2003	June	Turquin	PT-TU-S15	8	Aphrodes hamiltoni Quartau & Borges	Aphrodes	hamiltoni		Quartau& Borges, 2003	Cicadellidae	Hemiptera	Insecta	E	A_END	H	0	0	0	2	0	2	0
TER-TB-TY16_PT-ET-S14	NFF Terra Brava	Terra Brava C	TER-TB-TY16	26S	482076	4287536	PhD Clara	2003	June	Ethylene	PT-ET-S14	8	Aphrodes hamiltoni Quartau & Borges	Aphrodes	hamiltoni		Quartau& Borges, 2003	Cicadellidae	Hemiptera	Insecta	E	A_END	H	0	0	0	1	0	1	0
TER-TB-TY16_PT-TU-S25	NFF Terra Brava	Terra Brava C	TER-TB-TY16	26S	482076	4287536	PhD Clara	2003	June	Turquin	PT-TU-S25	8	Aphrodes hamiltoni Quartau & Borges	Aphrodes	hamiltoni		Quartau& Borges, 2003	Cicadellidae	Hemiptera	Insecta	E	A_END	H	0	0	0	1	0	1	0
TER-TB-TY16_PT-TU-S23	NFF Terra Brava	Terra Brava C	TER-TB-TY16	26S	482076	4287536	PhD Clara	2003	June	Turquin	PT-TU-S23	8	Aphrodes hamiltoni Quartau & Borges	Aphrodes	hamiltoni		Quartau& Borges, 2003	Cicadellidae	Hemiptera	Insecta	E	A_END	H	0	0	0	1	0	1	0
TER-TB-TY16_PT-TU-S09	NFF Terra Brava	Terra Brava C	TER-TB-TY16	26S	482076	4287536	PhD Clara	2003	June	Turquin	PT-TU-S09	8	Aphrodes hamiltoni Quartau & Borges	Aphrodes	hamiltoni		Quartau& Borges, 2003	Cicadellidae	Hemiptera	Insecta	E	A_END	H	1	0	0	0	0	1	1
TER-TB-TY18_PT-ET-S30	NFF Terra Brava	Terra Brava B	TER-TB-TY18	26S	482792	4287094	PhD Clara	2003	August	Ethylene	PT-ET-S30	8	Aphrodes hamiltoni Quartau & Borges	Aphrodes	hamiltoni		Quartau& Borges, 2003	Cicadellidae	Hemiptera	Insecta	E	A_END	H	1	0	0	0	0	1	1
TER-TB-TY18_PT-ET-S16	NFF Terra Brava	Terra Brava B	TER-TB-TY18	26S	482792	4287094	PhD Clara	2003	August	Ethylene	PT-ET-S16	8	Aphrodes hamiltoni Quartau & Borges	Aphrodes	hamiltoni		Quartau& Borges, 2003	Cicadellidae	Hemiptera	Insecta	E	A_END	H	1	0	0	0	0	1	1
TER-TB-TY18_PT-TU-S23	NFF Terra Brava	Terra Brava B	TER-TB-TY18	26S	482792	4287094	PhD Clara	2003	August	Turquin	PT-TU-S23	8	Aphrodes hamiltoni Quartau & Borges	Aphrodes	hamiltoni		Quartau& Borges, 2003	Cicadellidae	Hemiptera	Insecta	E	A_END	H	1	0	0	1	0	2	1
TER-TB-TY18_PT-TU-S19	NFF Terra Brava	Terra Brava B	TER-TB-TY18	26S	482792	4287094	PhD Clara	2003	August	Turquin	PT-TU-S19	8	Aphrodes hamiltoni Quartau & Borges	Aphrodes	hamiltoni		Quartau& Borges, 2003	Cicadellidae	Hemiptera	Insecta	E	A_END	H	1	0	0	0	0	1	1
TER-TB-TY18_PT-TU-S05	NFF Terra Brava	Terra Brava B	TER-TB-TY18	26S	482792	4287094	PhD Clara	2003	August	Turquin	PT-TU-S05	8	Aphrodes hamiltoni Quartau & Borges	Aphrodes	hamiltoni		Quartau& Borges, 2003	Cicadellidae	Hemiptera	Insecta	E	A_END	H	1	0	0	0	0	1	1
TER-TB-TY18_PT-ET-S10	NFF Terra Brava	Terra Brava B	TER-TB-TY18	26S	482792	4287094	PhD Clara	2003	August	Ethylene	PT-ET-S10	8	Aphrodes hamiltoni Quartau & Borges	Aphrodes	hamiltoni		Quartau& Borges, 2003	Cicadellidae	Hemiptera	Insecta	E	A_END	H	0	0	0	2	0	2	0
TER-TB-TY18_PT-TU-S25	NFF Terra Brava	Terra Brava B	TER-TB-TY18	26S	482792	4287094	PhD Clara	2003	August	Turquin	PT-TU-S25	8	Aphrodes hamiltoni Quartau & Borges	Aphrodes	hamiltoni		Quartau& Borges, 2003	Cicadellidae	Hemiptera	Insecta	E	A_END	H	2	0	0	0	0	2	2
PIC-CA-T-21_B-JU-S09	NFF Caveiro	Caveiro morro	PIC-CA-T-21	26S	394055	4255376	BALA	2000	July	Juniperus	B-JU-S09	359	Aptinothrips rufus Haliday	Aptinothrips	rufus		Haliday, 1836	Thripidae	Thysanoptera	Insecta	I		H	1	0	0	0	0	1	1
PIC-MP-T-12_B-IL-S04	NFF Mistério da Prainha	Mistério esq dir	PIC-MP-T-12	26S	388857	4258741	BALA	1999	September	Ilex	B-IL-S04	359	Aptinothrips rufus Haliday	Aptinothrips	rufus		Haliday, 1836	Thripidae	Thysanoptera	Insecta	I		H	3	0	0	0	0	3	3
SJG-PP-T-09_PT-TU-S19	NFF Pico Pinheiro	Pinheiro erical	SJG-PP-T-09	26S	408602	4277888	BALA2	2010	September	Turquin	PT-TU-S19	359	Aptinothrips rufus Haliday	Aptinothrips	rufus		Haliday, 1836	Thripidae	Thysanoptera	Insecta	I		H	1	0	0	0	0	1	1
SJG-PP-T-13_B-FR-S06	NFF Pico Pinheiro	Pico Pinheiro inferior	SJG-PP-T-13	26S	409256	4278677	PhD Clara	2004	July	Frangula	B-FR-S06	359	Aptinothrips rufus Haliday	Aptinothrips	rufus		Haliday, 1836	Thripidae	Thysanoptera	Insecta	I		H	0	0	0	0	1	1	0
SMR-PA-T-04_B-PT-S05	NFF Pico Alto	Ana e Clara	SMR-PA-T-04	26S	670170	4094140	PhD Clara	2004	June	Pittosporum	B-PT-S05	359	Aptinothrips rufus Haliday	Aptinothrips	rufus		Haliday, 1836	Thripidae	Thysanoptera	Insecta	I		H	1	0	0	0	0	1	1
TER-PG-T-22_B-LA-S07	NFF Pico Galhardo	Pico X A	TER-PG-T-22	26S	479664	4287554	Geotermia1	2002	July	Laurus	B-LA-S07	359	Aptinothrips rufus Haliday	Aptinothrips	rufus		Haliday, 1836	Thripidae	Thysanoptera	Insecta	I		H	1	0	0	0	0	1	1
TER-SB-T-05_PT-ET-S24	NFF Serra Sta. Bárbara	Tanque	TER-SB-T-05	26S	471646	4286413	BALA	1999	June	Ethylene	PT-ET-S24	359	Aptinothrips rufus Haliday	Aptinothrips	rufus		Haliday, 1836	Thripidae	Thysanoptera	Insecta	I		H	1	0	0	0	0	1	1
TER-SB-T-05_B-JU-S02	NFF Serra Sta. Bárbara	Tanque	TER-SB-T-05	26S	471646	4286413	BALA	1999	June	Juniperus	B-JU-S02	359	Aptinothrips rufus Haliday	Aptinothrips	rufus		Haliday, 1836	Thripidae	Thysanoptera	Insecta	I		H	0	0	0	1	0	1	0
TER-TB-T-18_B-VA-S03	NFF Terra Brava	Terra Brava B	TER-TB-T-18	26S	482792	4287094	Geotermia1	2002	July	Vaccinium	B-VA-S03	359	Aptinothrips rufus Haliday	Aptinothrips	rufus		Haliday, 1836	Thripidae	Thysanoptera	Insecta	I		H	6	0	0	0	0	6	6
TER-TB-T-18_B-VA-S04	NFF Terra Brava	Terra Brava B	TER-TB-T-18	26S	482792	4287094	Geotermia1	2002	July	Vaccinium	B-VA-S04	359	Aptinothrips rufus Haliday	Aptinothrips	rufus		Haliday, 1836	Thripidae	Thysanoptera	Insecta	I		H	1	0	0	0	0	1	1
TER-TB-T-18_B-VA-S09	NFF Terra Brava	Terra Brava B	TER-TB-T-18	26S	482792	4287094	Geotermia1	2002	July	Vaccinium	B-VA-S09	359	Aptinothrips rufus Haliday	Aptinothrips	rufus		Haliday, 1836	Thripidae	Thysanoptera	Insecta	I		H	1	0	0	0	0	1	1
TER-TB-T-18_B-VA-S10	NFF Terra Brava	Terra Brava B	TER-TB-T-18	26S	482792	4287094	Geotermia1	2002	July	Vaccinium	B-VA-S10	359	Aptinothrips rufus Haliday	Aptinothrips	rufus		Haliday, 1836	Thripidae	Thysanoptera	Insecta	I		H	1	0	0	0	0	1	1
FAI-CF-T-08_PT-TU-S07	NFF Caldeira do Faial	Fora trilho Caldeira	FAI-CF-T-08	26S	350801	4271693	PhD Clara	2004	July	Turquin	PT-TU-S07	19	Argyresthia atlanticella Rebel	Argyresthia	atlanticella		Rebel, 1940	Yponomeutidae	Lepidoptera	Insecta	E	A_END	H	0	0	0	1	0	1	0
FAI-CF-T-08_PT-TU-S21	NFF Caldeira do Faial	Fora trilho Caldeira	FAI-CF-T-08	26S	350801	4271693	PhD Clara	2004	July	Turquin	PT-TU-S21	19	Argyresthia atlanticella Rebel	Argyresthia	atlanticella		Rebel, 1940	Yponomeutidae	Lepidoptera	Insecta	E	A_END	H	0	0	0	2	0	2	0
FAI-CF-T-08_B-VA-S05	NFF Caldeira do Faial	Fora trilho Caldeira	FAI-CF-T-08	26S	350801	4271693	PhD Clara	2004	July	Vaccinium	B-VA-S05	19	Argyresthia atlanticella Rebel	Argyresthia	atlanticella		Rebel, 1940	Yponomeutidae	Lepidoptera	Insecta	E	A_END	H	1	0	0	0	0	1	1
FAI-CF-T-08_B-VA-S04	NFF Caldeira do Faial	Fora trilho Caldeira	FAI-CF-T-08	26S	350801	4271693	PhD Clara	2004	July	Vaccinium	B-VA-S04	19	Argyresthia atlanticella Rebel	Argyresthia	atlanticella		Rebel, 1940	Yponomeutidae	Lepidoptera	Insecta	E	A_END	H	1	0	0	0	0	1	1
FAI-CF-T-08_B-VA-S10	NFF Caldeira do Faial	Fora trilho Caldeira	FAI-CF-T-08	26S	350801	4271693	PhD Clara	2004	July	Vaccinium	B-VA-S10	19	Argyresthia atlanticella Rebel	Argyresthia	atlanticella		Rebel, 1940	Yponomeutidae	Lepidoptera	Insecta	E	A_END	H	3	0	0	0	0	3	3
FAI-CF-T-08_B-VA-S09	NFF Caldeira do Faial	Fora trilho Caldeira	FAI-CF-T-08	26S	350801	4271693	PhD Clara	2004	July	Vaccinium	B-VA-S09	19	Argyresthia atlanticella Rebel	Argyresthia	atlanticella		Rebel, 1940	Yponomeutidae	Lepidoptera	Insecta	E	A_END	H	1	0	0	0	0	1	1
FAI-CF-T-08_B-VA-S07	NFF Caldeira do Faial	Fora trilho Caldeira	FAI-CF-T-08	26S	350801	4271693	PhD Clara	2004	July	Vaccinium	B-VA-S07	19	Argyresthia atlanticella Rebel	Argyresthia	atlanticella		Rebel, 1940	Yponomeutidae	Lepidoptera	Insecta	E	A_END	H	2	0	0	0	0	2	2
FAI-CF-T-08_B-VA-S02	NFF Caldeira do Faial	Fora trilho Caldeira	FAI-CF-T-08	26S	350801	4271693	PhD Clara	2004	July	Vaccinium	B-VA-S02	19	Argyresthia atlanticella Rebel	Argyresthia	atlanticella		Rebel, 1940	Yponomeutidae	Lepidoptera	Insecta	E	A_END	H	7	0	0	0	0	7	7
FAI-CF-T-08_B-VA-S03	NFF Caldeira do Faial	Fora trilho Caldeira	FAI-CF-T-08	26S	350801	4271693	PhD Clara	2004	July	Vaccinium	B-VA-S03	19	Argyresthia atlanticella Rebel	Argyresthia	atlanticella		Rebel, 1940	Yponomeutidae	Lepidoptera	Insecta	E	A_END	H	0	0	0	1	0	1	0
FAI-CF-T-08_B-JU-S05	NFF Caldeira do Faial	Fora trilho Caldeira	FAI-CF-T-08	26S	350801	4271693	PhD Clara	2004	July	Juniperus	B-JU-S05	19	Argyresthia atlanticella Rebel	Argyresthia	atlanticella		Rebel, 1940	Yponomeutidae	Lepidoptera	Insecta	E	A_END	H	10	0	0	0	0	10	10
FAI-CF-T-08_B-JU-S04	NFF Caldeira do Faial	Fora trilho Caldeira	FAI-CF-T-08	26S	350801	4271693	PhD Clara	2004	July	Juniperus	B-JU-S04	19	Argyresthia atlanticella Rebel	Argyresthia	atlanticella		Rebel, 1940	Yponomeutidae	Lepidoptera	Insecta	E	A_END	H	6	0	0	0	0	6	6
FAI-CF-T-08_B-JU-S04	NFF Caldeira do Faial	Fora trilho Caldeira	FAI-CF-T-08	26S	350801	4271693	PhD Clara	2004	July	Juniperus	B-JU-S04	19	Argyresthia atlanticella Rebel	Argyresthia	atlanticella		Rebel, 1940	Yponomeutidae	Lepidoptera	Insecta	E	A_END	H	0	0	0	2	0	2	0
FAI-CF-T-08_B-JU-S07	NFF Caldeira do Faial	Fora trilho Caldeira	FAI-CF-T-08	26S	350801	4271693	PhD Clara	2004	July	Juniperus	B-JU-S07	19	Argyresthia atlanticella Rebel	Argyresthia	atlanticella		Rebel, 1940	Yponomeutidae	Lepidoptera	Insecta	E	A_END	H	5	0	0	0	0	5	5
FAI-CF-T-08_B-JU-S07	NFF Caldeira do Faial	Fora trilho Caldeira	FAI-CF-T-08	26S	350801	4271693	PhD Clara	2004	July	Juniperus	B-JU-S07	19	Argyresthia atlanticella Rebel	Argyresthia	atlanticella		Rebel, 1940	Yponomeutidae	Lepidoptera	Insecta	E	A_END	H	0	0	0	2	0	2	0
FAI-CF-T-08_B-JU-S03	NFF Caldeira do Faial	Fora trilho Caldeira	FAI-CF-T-08	26S	350801	4271693	PhD Clara	2004	July	Juniperus	B-JU-S03	19	Argyresthia atlanticella Rebel	Argyresthia	atlanticella		Rebel, 1940	Yponomeutidae	Lepidoptera	Insecta	E	A_END	H	8	0	0	0	0	8	8
FAI-CF-T-08_B-JU-S02	NFF Caldeira do Faial	Fora trilho Caldeira	FAI-CF-T-08	26S	350801	4271693	PhD Clara	2004	July	Juniperus	B-JU-S02	19	Argyresthia atlanticella Rebel	Argyresthia	atlanticella		Rebel, 1940	Yponomeutidae	Lepidoptera	Insecta	E	A_END	H	2	0	0	0	0	2	2
FAI-CF-T-08_B-JU-S01	NFF Caldeira do Faial	Fora trilho Caldeira	FAI-CF-T-08	26S	350801	4271693	PhD Clara	2004	July	Juniperus	B-JU-S01	19	Argyresthia atlanticella Rebel	Argyresthia	atlanticella		Rebel, 1940	Yponomeutidae	Lepidoptera	Insecta	E	A_END	H	19	0	0	0	0	19	19
FAI-CF-T-08_B-JU-S01	NFF Caldeira do Faial	Fora trilho Caldeira	FAI-CF-T-08	26S	350801	4271693	PhD Clara	2004	July	Juniperus	B-JU-S01	19	Argyresthia atlanticella Rebel	Argyresthia	atlanticella		Rebel, 1940	Yponomeutidae	Lepidoptera	Insecta	E	A_END	H	0	0	0	4	0	4	0
FAI-CF-T-08_B-JU-S09	NFF Caldeira do Faial	Fora trilho Caldeira	FAI-CF-T-08	26S	350801	4271693	PhD Clara	2004	July	Juniperus	B-JU-S09	19	Argyresthia atlanticella Rebel	Argyresthia	atlanticella		Rebel, 1940	Yponomeutidae	Lepidoptera	Insecta	E	A_END	H	13	0	0	0	0	13	13
FAI-CF-T-08_B-JU-S08	NFF Caldeira do Faial	Fora trilho Caldeira	FAI-CF-T-08	26S	350801	4271693	PhD Clara	2004	July	Juniperus	B-JU-S08	19	Argyresthia atlanticella Rebel	Argyresthia	atlanticella		Rebel, 1940	Yponomeutidae	Lepidoptera	Insecta	E	A_END	H	6	0	0	0	0	6	6
FAI-CF-T-08_B-JU-S08	NFF Caldeira do Faial	Fora trilho Caldeira	FAI-CF-T-08	26S	350801	4271693	PhD Clara	2004	July	Juniperus	B-JU-S08	19	Argyresthia atlanticella Rebel	Argyresthia	atlanticella		Rebel, 1940	Yponomeutidae	Lepidoptera	Insecta	E	A_END	H	0	0	0	3	0	3	0
FAI-CF-T-08_B-JU-S10	NFF Caldeira do Faial	Fora trilho Caldeira	FAI-CF-T-08	26S	350801	4271693	PhD Clara	2004	July	Juniperus	B-JU-S10	19	Argyresthia atlanticella Rebel	Argyresthia	atlanticella		Rebel, 1940	Yponomeutidae	Lepidoptera	Insecta	E	A_END	H	13	0	0	0	0	13	13
FAI-CF-T-08_B-JU-S10	NFF Caldeira do Faial	Fora trilho Caldeira	FAI-CF-T-08	26S	350801	4271693	PhD Clara	2004	July	Juniperus	B-JU-S10	19	Argyresthia atlanticella Rebel	Argyresthia	atlanticella		Rebel, 1940	Yponomeutidae	Lepidoptera	Insecta	E	A_END	H	0	0	0	4	0	4	0
FAI-CF-T-08_B-JU-S05	NFF Caldeira do Faial	Fora trilho Caldeira	FAI-CF-T-08	26S	350801	4271693	PhD Clara	2004	July	Juniperus	B-JU-S05	19	Argyresthia atlanticella Rebel	Argyresthia	atlanticella		Rebel, 1940	Yponomeutidae	Lepidoptera	Insecta	E	A_END	H	1	0	0	0	0	1	1
FAI-CF-T-08_B-JU-S01	NFF Caldeira do Faial	Fora trilho Caldeira	FAI-CF-T-08	26S	350801	4271693	PhD Clara	2004	July	Juniperus	B-JU-S01	19	Argyresthia atlanticella Rebel	Argyresthia	atlanticella		Rebel, 1940	Yponomeutidae	Lepidoptera	Insecta	E	A_END	H	4	0	0	0	0	4	4
FAI-CF-T-08_B-JU-S08	NFF Caldeira do Faial	Fora trilho Caldeira	FAI-CF-T-08	26S	350801	4271693	PhD Clara	2004	July	Juniperus	B-JU-S08	19	Argyresthia atlanticella Rebel	Argyresthia	atlanticella		Rebel, 1940	Yponomeutidae	Lepidoptera	Insecta	E	A_END	H	2	0	0	0	0	2	2
FAI-CF-T-09_B-VA-S05	NFF Caldeira do Faial	Trilho Caldeira superior	FAI-CF-T-09	26S	351349	4271682	PhD Clara	2004	July	Vaccinium	B-VA-S05	19	Argyresthia atlanticella Rebel	Argyresthia	atlanticella		Rebel, 1940	Yponomeutidae	Lepidoptera	Insecta	E	A_END	H	1	0	0	0	0	1	1
FAI-CF-T-09_B-VA-S02	NFF Caldeira do Faial	Trilho Caldeira superior	FAI-CF-T-09	26S	351349	4271682	PhD Clara	2004	July	Vaccinium	B-VA-S02	19	Argyresthia atlanticella Rebel	Argyresthia	atlanticella		Rebel, 1940	Yponomeutidae	Lepidoptera	Insecta	E	A_END	H	1	0	0	0	0	1	1
FAI-CF-T-09_B-VA-S02	NFF Caldeira do Faial	Trilho Caldeira superior	FAI-CF-T-09	26S	351349	4271682	PhD Clara	2004	July	Vaccinium	B-VA-S02	19	Argyresthia atlanticella Rebel	Argyresthia	atlanticella		Rebel, 1940	Yponomeutidae	Lepidoptera	Insecta	E	A_END	H	0	0	0	1	0	1	0
FAI-CF-T-09_B-VA-S10	NFF Caldeira do Faial	Trilho Caldeira superior	FAI-CF-T-09	26S	351349	4271682	PhD Clara	2004	July	Vaccinium	B-VA-S10	19	Argyresthia atlanticella Rebel	Argyresthia	atlanticella		Rebel, 1940	Yponomeutidae	Lepidoptera	Insecta	E	A_END	H	2	0	0	0	0	2	2
FAI-CF-T-09_B-VA-S04	NFF Caldeira do Faial	Trilho Caldeira superior	FAI-CF-T-09	26S	351349	4271682	PhD Clara	2004	July	Vaccinium	B-VA-S04	19	Argyresthia atlanticella Rebel	Argyresthia	atlanticella		Rebel, 1940	Yponomeutidae	Lepidoptera	Insecta	E	A_END	H	2	0	0	0	0	2	2
FAI-CF-T-09_B-VA-S08	NFF Caldeira do Faial	Trilho Caldeira superior	FAI-CF-T-09	26S	351349	4271682	PhD Clara	2004	July	Vaccinium	B-VA-S08	19	Argyresthia atlanticella Rebel	Argyresthia	atlanticella		Rebel, 1940	Yponomeutidae	Lepidoptera	Insecta	E	A_END	H	1	0	0	0	0	1	1
FAI-CF-T-09_B-VA-S06	NFF Caldeira do Faial	Trilho Caldeira superior	FAI-CF-T-09	26S	351349	4271682	PhD Clara	2004	July	Vaccinium	B-VA-S06	19	Argyresthia atlanticella Rebel	Argyresthia	atlanticella		Rebel, 1940	Yponomeutidae	Lepidoptera	Insecta	E	A_END	H	0	0	0	1	0	1	0
FAI-CF-T-09_B-VA-S07	NFF Caldeira do Faial	Trilho Caldeira superior	FAI-CF-T-09	26S	351349	4271682	PhD Clara	2004	July	Vaccinium	B-VA-S07	19	Argyresthia atlanticella Rebel	Argyresthia	atlanticella		Rebel, 1940	Yponomeutidae	Lepidoptera	Insecta	E	A_END	H	3	0	0	0	0	3	3
FAI-CF-T-09_B-VA-S07	NFF Caldeira do Faial	Trilho Caldeira superior	FAI-CF-T-09	26S	351349	4271682	PhD Clara	2004	July	Vaccinium	B-VA-S07	19	Argyresthia atlanticella Rebel	Argyresthia	atlanticella		Rebel, 1940	Yponomeutidae	Lepidoptera	Insecta	E	A_END	H	0	0	0	2	0	2	0
FAI-CF-T-09_B-VA-S01	NFF Caldeira do Faial	Trilho Caldeira superior	FAI-CF-T-09	26S	351349	4271682	PhD Clara	2004	July	Vaccinium	B-VA-S01	19	Argyresthia atlanticella Rebel	Argyresthia	atlanticella		Rebel, 1940	Yponomeutidae	Lepidoptera	Insecta	E	A_END	H	6	0	0	0	0	6	6
FAI-CF-T-09_B-VA-S03	NFF Caldeira do Faial	Trilho Caldeira superior	FAI-CF-T-09	26S	351349	4271682	PhD Clara	2004	July	Vaccinium	B-VA-S03	19	Argyresthia atlanticella Rebel	Argyresthia	atlanticella		Rebel, 1940	Yponomeutidae	Lepidoptera	Insecta	E	A_END	H	1	0	0	0	0	1	1
FAI-CF-T-09_B-VA-S09	NFF Caldeira do Faial	Trilho Caldeira superior	FAI-CF-T-09	26S	351349	4271682	PhD Clara	2004	July	Vaccinium	B-VA-S09	19	Argyresthia atlanticella Rebel	Argyresthia	atlanticella		Rebel, 1940	Yponomeutidae	Lepidoptera	Insecta	E	A_END	H	4	0	0	0	0	4	4
FAI-CF-T-09_B-JU-S03	NFF Caldeira do Faial	Trilho Caldeira superior	FAI-CF-T-09	26S	351349	4271682	PhD Clara	2004	July	Juniperus	B-JU-S03	19	Argyresthia atlanticella Rebel	Argyresthia	atlanticella		Rebel, 1940	Yponomeutidae	Lepidoptera	Insecta	E	A_END	H	5	0	0	0	0	5	5
FAI-CF-T-09_B-JU-S09	NFF Caldeira do Faial	Trilho Caldeira superior	FAI-CF-T-09	26S	351349	4271682	PhD Clara	2004	July	Juniperus	B-JU-S09	19	Argyresthia atlanticella Rebel	Argyresthia	atlanticella		Rebel, 1940	Yponomeutidae	Lepidoptera	Insecta	E	A_END	H	9	0	0	0	0	9	9
FAI-CF-T-09_B-JU-S09	NFF Caldeira do Faial	Trilho Caldeira superior	FAI-CF-T-09	26S	351349	4271682	PhD Clara	2004	July	Juniperus	B-JU-S09	19	Argyresthia atlanticella Rebel	Argyresthia	atlanticella		Rebel, 1940	Yponomeutidae	Lepidoptera	Insecta	E	A_END	H	0	0	0	1	0	1	0
FAI-CF-T-09_B-JU-S08	NFF Caldeira do Faial	Trilho Caldeira superior	FAI-CF-T-09	26S	351349	4271682	PhD Clara	2004	July	Juniperus	B-JU-S08	19	Argyresthia atlanticella Rebel	Argyresthia	atlanticella		Rebel, 1940	Yponomeutidae	Lepidoptera	Insecta	E	A_END	H	15	0	0	0	0	15	15
FAI-CF-T-09_B-JU-S08	NFF Caldeira do Faial	Trilho Caldeira superior	FAI-CF-T-09	26S	351349	4271682	PhD Clara	2004	July	Juniperus	B-JU-S08	19	Argyresthia atlanticella Rebel	Argyresthia	atlanticella		Rebel, 1940	Yponomeutidae	Lepidoptera	Insecta	E	A_END	H	0	0	0	2	0	2	0
FAI-CF-T-09_B-JU-S04	NFF Caldeira do Faial	Trilho Caldeira superior	FAI-CF-T-09	26S	351349	4271682	PhD Clara	2004	July	Juniperus	B-JU-S04	19	Argyresthia atlanticella Rebel	Argyresthia	atlanticella		Rebel, 1940	Yponomeutidae	Lepidoptera	Insecta	E	A_END	H	16	0	0	0	0	16	16
FAI-CF-T-09_B-JU-S04	NFF Caldeira do Faial	Trilho Caldeira superior	FAI-CF-T-09	26S	351349	4271682	PhD Clara	2004	July	Juniperus	B-JU-S04	19	Argyresthia atlanticella Rebel	Argyresthia	atlanticella		Rebel, 1940	Yponomeutidae	Lepidoptera	Insecta	E	A_END	H	0	0	0	1	0	1	0
FAI-CF-T-09_B-JU-S10	NFF Caldeira do Faial	Trilho Caldeira superior	FAI-CF-T-09	26S	351349	4271682	PhD Clara	2004	July	Juniperus	B-JU-S10	19	Argyresthia atlanticella Rebel	Argyresthia	atlanticella		Rebel, 1940	Yponomeutidae	Lepidoptera	Insecta	E	A_END	H	15	0	0	0	0	15	15
FAI-CF-T-09_B-JU-S01	NFF Caldeira do Faial	Trilho Caldeira superior	FAI-CF-T-09	26S	351349	4271682	PhD Clara	2004	July	Juniperus	B-JU-S01	19	Argyresthia atlanticella Rebel	Argyresthia	atlanticella		Rebel, 1940	Yponomeutidae	Lepidoptera	Insecta	E	A_END	H	7	0	0	0	0	7	7
FAI-CF-T-09_B-JU-S07	NFF Caldeira do Faial	Trilho Caldeira superior	FAI-CF-T-09	26S	351349	4271682	PhD Clara	2004	July	Juniperus	B-JU-S07	19	Argyresthia atlanticella Rebel	Argyresthia	atlanticella		Rebel, 1940	Yponomeutidae	Lepidoptera	Insecta	E	A_END	H	18	0	0	0	0	18	18
FAI-CF-T-09_B-JU-S05	NFF Caldeira do Faial	Trilho Caldeira superior	FAI-CF-T-09	26S	351349	4271682	PhD Clara	2004	July	Juniperus	B-JU-S05	19	Argyresthia atlanticella Rebel	Argyresthia	atlanticella		Rebel, 1940	Yponomeutidae	Lepidoptera	Insecta	E	A_END	H	19	0	0	0	0	19	19
FAI-CF-T-09_B-JU-S05	NFF Caldeira do Faial	Trilho Caldeira superior	FAI-CF-T-09	26S	351349	4271682	PhD Clara	2004	July	Juniperus	B-JU-S05	19	Argyresthia atlanticella Rebel	Argyresthia	atlanticella		Rebel, 1940	Yponomeutidae	Lepidoptera	Insecta	E	A_END	H	0	0	0	2	0	2	0
FAI-CF-T-09_B-JU-S02	NFF Caldeira do Faial	Trilho Caldeira superior	FAI-CF-T-09	26S	351349	4271682	PhD Clara	2004	July	Juniperus	B-JU-S02	19	Argyresthia atlanticella Rebel	Argyresthia	atlanticella		Rebel, 1940	Yponomeutidae	Lepidoptera	Insecta	E	A_END	H	29	0	0	0	0	29	29
FAI-CF-T-09_B-JU-S06	NFF Caldeira do Faial	Trilho Caldeira superior	FAI-CF-T-09	26S	351349	4271682	PhD Clara	2004	July	Juniperus	B-JU-S06	19	Argyresthia atlanticella Rebel	Argyresthia	atlanticella		Rebel, 1940	Yponomeutidae	Lepidoptera	Insecta	E	A_END	H	11	0	0	0	0	11	11
FAI-CF-T-09_B-JU-S06	NFF Caldeira do Faial	Trilho Caldeira superior	FAI-CF-T-09	26S	351349	4271682	PhD Clara	2004	July	Juniperus	B-JU-S06	19	Argyresthia atlanticella Rebel	Argyresthia	atlanticella		Rebel, 1940	Yponomeutidae	Lepidoptera	Insecta	E	A_END	H	0	0	0	1	0	1	0
FAI-CF-T-09_B-ER-S01	NFF Caldeira do Faial	Trilho Caldeira superior	FAI-CF-T-09	26S	351349	4271682	PhD Clara	2004	July	Erica	B-ER-S01	19	Argyresthia atlanticella Rebel	Argyresthia	atlanticella		Rebel, 1940	Yponomeutidae	Lepidoptera	Insecta	E	A_END	H	10	0	0	0	0	10	10
FAI-CF-T-09_B-ER-S01	NFF Caldeira do Faial	Trilho Caldeira superior	FAI-CF-T-09	26S	351349	4271682	PhD Clara	2004	July	Erica	B-ER-S01	19	Argyresthia atlanticella Rebel	Argyresthia	atlanticella		Rebel, 1940	Yponomeutidae	Lepidoptera	Insecta	E	A_END	H	0	0	0	7	0	7	0
FAI-CF-T-09_B-ER-S02	NFF Caldeira do Faial	Trilho Caldeira superior	FAI-CF-T-09	26S	351349	4271682	PhD Clara	2004	July	Erica	B-ER-S02	19	Argyresthia atlanticella Rebel	Argyresthia	atlanticella		Rebel, 1940	Yponomeutidae	Lepidoptera	Insecta	E	A_END	H	9	0	0	0	0	9	9
FAI-CF-T-09_B-ER-S02	NFF Caldeira do Faial	Trilho Caldeira superior	FAI-CF-T-09	26S	351349	4271682	PhD Clara	2004	July	Erica	B-ER-S02	19	Argyresthia atlanticella Rebel	Argyresthia	atlanticella		Rebel, 1940	Yponomeutidae	Lepidoptera	Insecta	E	A_END	H	0	0	0	2	0	2	0
FAI-CF-T-09_B-ER-S10	NFF Caldeira do Faial	Trilho Caldeira superior	FAI-CF-T-09	26S	351349	4271682	PhD Clara	2004	July	Erica	B-ER-S10	19	Argyresthia atlanticella Rebel	Argyresthia	atlanticella		Rebel, 1940	Yponomeutidae	Lepidoptera	Insecta	E	A_END	H	25	0	0	0	0	25	25
FAI-CF-T-09_B-ER-S07	NFF Caldeira do Faial	Trilho Caldeira superior	FAI-CF-T-09	26S	351349	4271682	PhD Clara	2004	July	Erica	B-ER-S07	19	Argyresthia atlanticella Rebel	Argyresthia	atlanticella		Rebel, 1940	Yponomeutidae	Lepidoptera	Insecta	E	A_END	H	2	0	0	0	0	2	2
FAI-CF-T-09_B-ER-S06	NFF Caldeira do Faial	Trilho Caldeira superior	FAI-CF-T-09	26S	351349	4271682	PhD Clara	2004	July	Erica	B-ER-S06	19	Argyresthia atlanticella Rebel	Argyresthia	atlanticella		Rebel, 1940	Yponomeutidae	Lepidoptera	Insecta	E	A_END	H	19	0	0	0	0	19	19
FAI-CF-T-09_B-ER-S04	NFF Caldeira do Faial	Trilho Caldeira superior	FAI-CF-T-09	26S	351349	4271682	PhD Clara	2004	July	Erica	B-ER-S04	19	Argyresthia atlanticella Rebel	Argyresthia	atlanticella		Rebel, 1940	Yponomeutidae	Lepidoptera	Insecta	E	A_END	H	39	0	0	0	0	39	39
FAI-CF-T-09_B-ER-S04	NFF Caldeira do Faial	Trilho Caldeira superior	FAI-CF-T-09	26S	351349	4271682	PhD Clara	2004	July	Erica	B-ER-S04	19	Argyresthia atlanticella Rebel	Argyresthia	atlanticella		Rebel, 1940	Yponomeutidae	Lepidoptera	Insecta	E	A_END	H	0	0	0	5	0	5	0
FAI-CF-T-09_B-ER-S03	NFF Caldeira do Faial	Trilho Caldeira superior	FAI-CF-T-09	26S	351349	4271682	PhD Clara	2004	July	Erica	B-ER-S03	19	Argyresthia atlanticella Rebel	Argyresthia	atlanticella		Rebel, 1940	Yponomeutidae	Lepidoptera	Insecta	E	A_END	H	38	0	0	0	0	38	38
FAI-CF-T-09_B-ER-S03	NFF Caldeira do Faial	Trilho Caldeira superior	FAI-CF-T-09	26S	351349	4271682	PhD Clara	2004	July	Erica	B-ER-S03	19	Argyresthia atlanticella Rebel	Argyresthia	atlanticella		Rebel, 1940	Yponomeutidae	Lepidoptera	Insecta	E	A_END	H	0	0	0	1	0	1	0
FAI-CF-T-09_B-ER-S05	NFF Caldeira do Faial	Trilho Caldeira superior	FAI-CF-T-09	26S	351349	4271682	PhD Clara	2004	July	Erica	B-ER-S05	19	Argyresthia atlanticella Rebel	Argyresthia	atlanticella		Rebel, 1940	Yponomeutidae	Lepidoptera	Insecta	E	A_END	H	5	0	0	0	0	5	5
FAI-CF-T-09_B-ER-S05	NFF Caldeira do Faial	Trilho Caldeira superior	FAI-CF-T-09	26S	351349	4271682	PhD Clara	2004	July	Erica	B-ER-S05	19	Argyresthia atlanticella Rebel	Argyresthia	atlanticella		Rebel, 1940	Yponomeutidae	Lepidoptera	Insecta	E	A_END	H	0	0	0	3	0	3	0
FAI-CF-T-09_B-ER-S09	NFF Caldeira do Faial	Trilho Caldeira superior	FAI-CF-T-09	26S	351349	4271682	PhD Clara	2004	July	Erica	B-ER-S09	19	Argyresthia atlanticella Rebel	Argyresthia	atlanticella		Rebel, 1940	Yponomeutidae	Lepidoptera	Insecta	E	A_END	H	28	0	0	0	0	28	28
FAI-CF-T-09_B-ER-S09	NFF Caldeira do Faial	Trilho Caldeira superior	FAI-CF-T-09	26S	351349	4271682	PhD Clara	2004	July	Erica	B-ER-S09	19	Argyresthia atlanticella Rebel	Argyresthia	atlanticella		Rebel, 1940	Yponomeutidae	Lepidoptera	Insecta	E	A_END	H	0	0	0	15	0	15	0
FAI-CF-T-09_B-ER-S08	NFF Caldeira do Faial	Trilho Caldeira superior	FAI-CF-T-09	26S	351349	4271682	PhD Clara	2004	July	Erica	B-ER-S08	19	Argyresthia atlanticella Rebel	Argyresthia	atlanticella		Rebel, 1940	Yponomeutidae	Lepidoptera	Insecta	E	A_END	H	37	0	0	0	0	37	37
FAI-CF-T-09_B-ER-S08	NFF Caldeira do Faial	Trilho Caldeira superior	FAI-CF-T-09	26S	351349	4271682	PhD Clara	2004	July	Erica	B-ER-S08	19	Argyresthia atlanticella Rebel	Argyresthia	atlanticella		Rebel, 1940	Yponomeutidae	Lepidoptera	Insecta	E	A_END	H	0	0	0	11	0	11	0
FAI-CF-T-09_B-JU-S09	NFF Caldeira do Faial	Trilho Caldeira superior	FAI-CF-T-09	26S	351349	4271682	PhD Clara	2004	July	Juniperus	B-JU-S09	19	Argyresthia atlanticella Rebel	Argyresthia	atlanticella		Rebel, 1940	Yponomeutidae	Lepidoptera	Insecta	E	A_END	H	1	0	0	0	0	1	1
FAI-CF-T-09_B-JU-S02	NFF Caldeira do Faial	Trilho Caldeira superior	FAI-CF-T-09	26S	351349	4271682	PhD Clara	2004	July	Juniperus	B-JU-S02	19	Argyresthia atlanticella Rebel	Argyresthia	atlanticella		Rebel, 1940	Yponomeutidae	Lepidoptera	Insecta	E	A_END	H	1	0	0	0	0	1	1
FAI-CF-T-10_B-IL-S02	NFF Caldeira do Faial	Trilho Caldeira inferior	FAI-CF-T-10	26S	351110	4271917	BALA2	2010	September	Ilex	B-IL-S02	19	Argyresthia atlanticella Rebel	Argyresthia	atlanticella		Rebel, 1940	Yponomeutidae	Lepidoptera	Insecta	E	A_END	H	1	0	0	0	0	1	1
FAI-CF-T-10_B-IL-S03	NFF Caldeira do Faial	Trilho Caldeira inferior	FAI-CF-T-10	26S	351110	4271917	BALA2	2010	September	Ilex	B-IL-S03	19	Argyresthia atlanticella Rebel	Argyresthia	atlanticella		Rebel, 1940	Yponomeutidae	Lepidoptera	Insecta	E	A_END	H	1	0	0	0	0	1	1
FAI-CF-T-10_B-IL-S05	NFF Caldeira do Faial	Trilho Caldeira inferior	FAI-CF-T-10	26S	351110	4271917	BALA2	2010	September	Ilex	B-IL-S05	19	Argyresthia atlanticella Rebel	Argyresthia	atlanticella		Rebel, 1940	Yponomeutidae	Lepidoptera	Insecta	E	A_END	H	1	0	0	0	0	1	1
FAI-CF-T-10_B-IL-S07	NFF Caldeira do Faial	Trilho Caldeira inferior	FAI-CF-T-10	26S	351110	4271917	BALA2	2010	September	Ilex	B-IL-S07	19	Argyresthia atlanticella Rebel	Argyresthia	atlanticella		Rebel, 1940	Yponomeutidae	Lepidoptera	Insecta	E	A_END	H	1	0	0	0	0	1	1
FAI-CF-T-10_B-JU-S01	NFF Caldeira do Faial	Trilho Caldeira inferior	FAI-CF-T-10	26S	351110	4271917	BALA2	2010	September	Juniperus	B-JU-S01	19	Argyresthia atlanticella Rebel	Argyresthia	atlanticella		Rebel, 1940	Yponomeutidae	Lepidoptera	Insecta	E	A_END	H	40	0	0	0	0	40	40
[truncated: 44,541 more rows]
