# Supplementary material for: New records and detailed distribution and abundance of selected arthropod species collected between 1999 and 2011 in Azorean native forests
Source: Biodivers Data J. 2016 Dec 22;(4):e10948. doi: 10.3897/BDJ.4.e10948 (PMC5267528; doi:10.3897/BDJ.4.e10948)
Supplement: Supplementary material 5 — Appendix 5 -Abundance data [file biodiversity_data_journal-4-e10948-s005.xlsx]

## Sheet: Sheet1
Order	Species	N/E/I	NFF Atalhada	NFF Biscoito da Ferraria	NFF Cabeço do Fogo	NFF Caldeira do Faial	NFF Caldeira Guilherme Moniz	NFF Caldeiras Funda e Rasa	NFF Caveiro	NFF Graminhais	NFF Lagoa do Caiado	NFF Mistério da Prainha	NFF Morro Alto e Pico da Sé	NFF Pico Alto	NFF Pico da Vara	NFF Pico Galhardo	NFF Pico Pinheiro	NFF Serra Sta. Bárbara	NFF Terra Brava	NFF Topo	Grand Total
Lepidoptera	Argyresthia atlanticella Rebel	E	38	1471	1145	1163	1139	1436	1991	73	1582	2643	2919	1164	546	711	5304	1131	1244	2131	27831
Araneae	Savigniorrhipis acoreensis Wunderlich	E	53	1684		286	85	551	968	329	353	783	1734	217	99	762	586	2536	1877	870	13773
Araneae	Lathys dentichelis (Simon)	N	348	1776	129	748	520	64	335	82	102	1139	120	283	732	1009	581	1693	1617	344	11622
Opiliones	Leiobunum blackwalli Meade	N		66	1929	148	793	95		4	95	2183	40		16	118	92	124	332		6035
Julida	Ommatoiulus moreletii (Lucas)	I	6	176	1432	175	261	1047	169	37	130	724	246	493	15	56	124	364	178	234	5867
Blattaria	Zetha vestita (Brullé)	N	110	485	113	171	263	202	3			559	173	383	468	298	464	1059	701	66	5518
Lithobiomorpha	Lithobius pilicornis pilicornis Newport	N		304	3	101	47	62	122	6	164	275	526		6	349	227	1927	467	366	4952
Hemiptera	Cinara juniperi (De Geer)	N	22	493	67	255		62	228	169	120	502	70		33	112	94	2046	249	187	4709
Araneae	Rugathodes acoreensis Wunderlich	E	187	321	189	334	43	16	214	64	79	101	84	158	231	246	586	1056	632	96	4637
Hemiptera	Kleidocerys ericae (Horváth)	N		1	301	46	999	790	6	2	7	48	15	2001	180	11	41	14	49	13	4524
Araneae	Gibbaranea occidentalis Wunderlich	E	155	284	78	190	120	14	102		79	435	131	413	237	484	320	880	520	15	4457
Hemiptera	Cixius azoterceirae Remane & Asche	E		1695			64									347		1162	681		3949
Hemiptera	Trioza (Lauritrioza) laurisilvae Hodkinson	N	169	151		430	942		40	59	20	409	80	414	53	450	25	278	124	7	3651
Araneae	Tenuiphantes miguelensis Wunderlich	N	106	218	84	60	25	83	102	146	148	608	44	128	162	159	211	765	336	168	3553
Hemiptera	Cyphopterum adcendens (Herr.-Schaff.)	N	69	632	56	67	137	114	2	5	5	408	219	216	59	237	268	471	328	3	3296
Hemiptera	Pinalitus oromii J. Ribes	E	30	138	88	130	18	65	415	4	293	149	190	162	43	128	323	294	147	151	2768
Araneae	Sancus acoreensis (Wunderlich)	E	125	294		27		11	175	47	122	85	65	168	89	279	181	772	293	15	2748
Hemiptera	Cixius insularis Lindberg	E	67							1487					1048						2602
Lepidoptera	Cyclophora azorensis (Prout)	E	1	201	270	310	422	59	1	2	106	203		135	106	5	178	206	236	4	2445
Hemiptera	Cixius azopifajo azopifajo Remane & Asche	E							635		374	1323									2332
Psocoptera	Ectopsocus briggsi McLachlan	I	20	8	127	184	19	128	61	29	57	212	180	556	185	83	129	102	65	83	2228
Hemiptera	Strophingia harteni Hodkinson	E		484	90	47	315	46	2		402	182		190	24	3	150	16	147	57	2155
Araneae	Xysticus cor Canestrini	N		119	95	107	9	55	225	14	127	291	248	1	12	21	73	188	31	489	2105
Lepidoptera	Rhopobota naevana (Hübner)	I	61	256		55	11	68	225	29	135	90	21	3	21	41	25	474	212	34	1761
Coleoptera	Paranchus albipes (Fabricius)	I	84	4		172			11	330	12	14	1	64	413	5	11	43	532		1696
Psocoptera	Trichopsocus clarus (Banks)	N	486	10	139	6	20		92	4	161	416		1	71	20	84	9	34	26	1579
Opiliones	Homalenotus coriaceus (Simon)	N	48		65		283	313		60		9	70	183	479	1			18		1529
Hemiptera	Cixius azofloresi Remane & Asche	E						198					1209								1407
Araneae	Macaroeris cata (Blackwall)	N	29	155	7	175	98	7	69	21	66	127	7	10	53	105	56	219	155	47	1406
Psocoptera	Elipsocus brincki Badonnel	E	1	62	14	131	1	11	234		150	51	46	2	8	68	102	328	34	154	1397
Araneae	Pardosa acorensis Simon	E	3	45	40	81	54	85	46	13	21	129	255	8	42	5	3	144	48	307	1329
Lepidoptera	Ascotis fortunata azorica Pinker	E	14	446	7	8	48	22	10	2	30	85	18	3	31	79	48	256	150	4	1261
Araneae	Tenuiphantes tenuis (Blackwall)	I	13	35	181	35	111	187	13	11	41	51	90	326	8	21	17	55	23	6	1224
Hemiptera	Cixius azopifajo azojo Remane & Asche	E															346			547	893
Psocoptera	Valenzuela flavidus (Stephens)	N	45	32	11	30	8	9	41		32	82	94	183	18	35	67	91	19	64	861
Araneae	Cheiracanthium erraticum (Walckenaer)	I	1	118	9	20	155		37	46	7	35		129	16	18		150	35		776
Lepidoptera	Xanthorhoe inaequata (Warren)	E	14	177	3	6	21	7	4	1	24	65	5	28	72	34	36	127	91	3	718
Hemiptera	Aphrodes hamiltoni Quartau & Borges	E	3	50	49	22	19	81	28		45	62	32	41	3	16	55	112	77	22	717
Araneae	Oedothorax fuscus (Blackwall)	I	1	18	2	454		3	2	1	6	13	3	1	1	3	1	78	8	5	600
Coleoptera	Alestrus dolosus (Crotch)	E	28	100				38	4	217			5		154	6		6	9		567
Polydesmida	Polydesmus coriaceus Porat	I	38	39	21		33	164		6	1	115	4	42	29	11	9	9	22	4	547
Araneae	Dysdera crocata C. L. Koch	I		18	50		32	125			1	89	81	16		7	65	36	14	3	537
Araneae	Clubiona decora Blackwall	N	116	3	31		74	1	20	3	20	148	1	20	38	10	4	5	2	21	517
Julida	Cylindroiulus propinquus (Porat)	I	66	44	55	9	4	59	7	20	7	11	24	19	35	19	14	87	17	16	513
Neuroptera	Hemerobius azoricus Tjeder	E	17	50		4	3	3	37	7	30	33	5	13	13	60	25	133	63	11	507
Coleoptera	Calacalles subcarinatus (Israelson)	E	25	20		66		32				87	41	5	38	6	18	77	72	3	490
Psocoptera	Elipsocus azoricus Meinander	E	17	14	2	51	166	9	13		11	12	13	26	9	16	43	28	10	18	458
Araneae	Minicia floresensis Wunderlich	E		15				105	10		112	32	62				13	13	2	79	443
Hemiptera	Megamelodes quadrimaculatus (Signoret)	N	12	11	32	31	13	16	36		75	9	14		3	4	10	58	47	70	441
Hemiptera	Cixius azopifajo azofa Remane & Asche	E			27	408															435
Araneae	Acorigone acoreensis (Wunderlich)	E		24		25	3	4	124	11	28	39	10	4	2	14	8	64	47	20	427
Hemiptera	Scolopostethus decoratus (Hahn)	N	1		144		60	27	6				2	161	11				1		413
Julida	Blaniulus guttullatus (Fabricius)	I			7	1		16		1				384							409
Pseudoscorpiones	Chthonius ischnocheles (Hermann)	I		59		2	25	3			6	65		3	3	54	24	70	88	1	403
Julida	Choneiulus palmatus (Nemec)	I		2				196				1	75	88		2	16	2			382
Coleoptera	Stelidota geminata (Say)	I		3	192		6	35	1			1	10	76		11	38	3	1	4	381
Microcoryphia	Dilta saxicola (Womersley)	N	21	53		9	5					59		53	34	8	31	13	84	7	377
Coleoptera	Trechus terrabravensis Borges, Serrano & Amorim	E		7												7		17	331		362
Coleoptera	Anaspis proteus (Wollaston)	N	3	91		11	5	7	7		71	19	13	2	23	31	7	35	13	6	344
Psocoptera	Valenzuela burmeisteri (Brauer)	N	9	1									3	251	70	2	5				341
Araneae	Agyneta depigmentata Wunderlich	E						5					308								313
Coleoptera	Cedrorum azoricus azoricus Borges & Serrano	E		14														174	113		301
Lepidoptera	Nycterosea obstipata (Fabricius)	N	40	84	4	4	7	3	3	1	3	10	2	8	3	13	11	53	18	3	270
Araneae	Canariphantes acoreensis (Wunderlich)	E		12		1	20		3		4	18				42	28	40	95	5	268
Microcoryphia	Trigoniophthalmus borgesi Mendes et al.	E	2	51			1					7		1		8		82	111	4	267
Araneae	Lasaeola oceanica Simon	E	26	18	1	9		5	1		13	71	47	5	8	11	11	23	13	3	265
Polydesmida	Oxidus gracilis (C.L.Koch)	I	1		113			48						89	11						262
Psocoptera	Atlantopsocus adustus (Hagen)	N	11		11	42	99	3				1			86			2			255
Araneae	Palliduphantes schmitzi (Kulczynski)	N	1	5	21	6	34	46	9	1	23	8	25	15	3	1	8	26	1		233
Araneae	Ero furcata (Villers)	I	1	10	9	1	3	3	1		4	30	3	3	6	27	32	22	39		194
Trichoptera	Limnephilus atlanticus Nybom	E		9		10			61	8		2	28		2			21		35	176
Hemiptera	Toxoptera aurantii (Boyer de Fonscolombe)	I	2									166									168
Lepidoptera	Scoparia coecimaculalis Warre	E		15		1		8	17	9	14	25	6	4	1	14	11	24	8	2	159
Hemiptera	Rhopalosiphonimus latysiphon (Davidson)	I	13	2	1	3	1	11	4	8		20		29	22	3		16	4	6	143
Araneae	Theridion musivivum Schmidt	N	41		2				1			92		1	2						139
Araneae	Pisaura acoreensis Wunderlich	E		12		2	3	1	7	5	3	16	15	2	9	8	5	24	8	17	137
Coleoptera	Pseudophloeophagus tenax (Wollaston)	N		27	4	11	2	15	6	1		9	5	4	6	7	5	12	15	4	133
Hemiptera	Cixius azomariae Remane & Asche	E												125							125
Coleoptera	Pterostichus vernalis (Panzer)	I	3			113			1	1									3	1	122
Coleoptera	Drouetius borgesi borgesi Machado	E														47		64	5		116
Julida	Proteroiulus fuscus (Am Stein)	I		2	3			22					24	60					1		112
Araneae	Cheiracanthium floresense Wunderlich	E						47					59								106
Julida	Nopoiulus kochii (Gervais)	I			2	3								95							100
Dermaptera	Euborellia annulipes (Lucas)	I	27		9			14		1				39	9						99
Coleoptera	Ptenidium pusillum (Gyllenhal)	I	1									1		70	1				25		98
Araneae	Nigma puella (Simon)	I	85						1			1			5					3	95
Lepidoptera	Mythimna unipuncta (Haworth)	N		11	3	5	1	5		3		4	7	4	2	4	3	21	12	1	86
Pseudoscorpiones	Chthonius tetrachelatus (Preyssler)	I	1	5			18	5				13		5	3	14	1	4	11		80
Pseudoscorpiones	Neobisium maroccanum Beier	I			1				1		38	34					6				80
Coleoptera	Pseudechinosoma nodosum Hustache	E							10	2		29		25	3	1	1		2		73
Araneae	Erigone atra Blackwall	I	1	9	1	10		2	4	3	4	3	1			1	1	23	6	3	72
Coleoptera	Epuraea biguttata (Thunberg)	I	21	1	6					1		1	1	22	16	2			1		72
Julida	Cylindroiulus latestriatus (Curtis)	I			17			2						53							72
Dermaptera	Forficula auricularia Linnaeus	I	8					4		5				48	3		1			1	70
Araneae	Zodarion atlanticum Pekár & Cardoso	I			67																67
Hemiptera	Anoscopus albifrons (Linnaeus)	N		1		1	3	2	5		2	11	24	5	1	2		5	2	3	67
Julida	Brachyiulus pusillus (Leach)	I			4			42					1	18	2						67
Lepidoptera	Cyclophora pupillaria granti Prout	E												67							67
Thysanoptera	Heliothrips haemorrhoidalis (Bouché)	I	4		1		1	2				18			34			1	1		62
Araneae	Walckenaeria grandis (Wunderlich)	E		4					3	1	1		1			1		32	2	16	61
Araneae	Microlinyphia johnsoni (Blackwall)	N	19	6			3		1			3				15	1	7	4	1	60
Araneae	Xysticus nubilus Simon	I		5	3	3		1	1		1	1	10							31	56
Araneae	Emblyna acoreensis Wunderlich	E			8						3	42									53
Araneae	Canariphantes relictus Crespo & Bosmans	E												52							52
Araneae	Metellina merianae (Scopoli)	I					2				8	31		6	1				2		50
Lepidoptera	Eudonia luteusalis (Hampson)	E		10					1			2				3	2	22	5	5	50
Araneae	Steatoda grossa (C.L. Koch)	I	13		1	2	1		2		1	3		21		1	1	1	1		48
Araneae	Neon acoreensis Wunderlich	E		2	2			15	2			8	12					2	1	3	47
Araneae	Clubiona terrestris Westring	I	16	1		1	2					2	1	1	13	2		3	1		43
Thysanoptera	Hoplothrips corticis (De Geer)	N	2	1	3		1	11			1	11	3	4		1	3	2			43
Coleoptera	Pseudanchomenes aptinoides Tarnier	E							35		3	3									41
Araneae	Agyneta decora (O.P.-Cambridge)	I		2									18			1		9	3	5	38
Araneae	Erigone autumnalis Emerton	I			2			21	1				5	3	1			3		2	38
Araneae	Porrhomma borgesi Wunderlich	E		10						4	1	2				3		12	3		35
Coleoptera	Cedrorum azoricus caveirensis Borges & Serrano	E							24			10									34
Coleoptera	Ocys harpaloides (Audinet-Serville)	N					1	2		24		1	1		2					1	32
Geophilomorpha	Geophilus truncorum Bergsoe & Meinert	N		1	2		1		1			1			9	2	2	6	6	1	32
Araneae	Cheiracanthium jorgeense Wunderlich	E															9			21	30
Hemiptera	Monalocoris filicis (Linnaeus)	N	1	1			5	2	2		4		1			4	2	4	4		30
Hemiptera	Rhopalosiphum oxyacanthae (Schrank)	I		1				3			1	7		1	1	11	1	1	1		28
Araneae	Cryptachaea blattea (Urquhart)	I	8		3		1	3				1		4	6			1			27
Polydesmida	Brachydesmus superus Latzel	I	2	3			1	10		1		1			1			1	7		27
Hemiptera	Campyloneura virgula (Herrich-Schaeffer)	N	5									10			1		9				25
Scolopendromorpha	Cryptops hortensis Leach	N	1	1	2	1	1					1	9		3	3		2	1		25
Hemiptera	Cixius azoricus azoricus Lindberg	E	1	16						2								3	2		24
Psocoptera	Lachesilla greeni (Pearman)	I		7			2							1		4		7	3		24
Thysanoptera	Ceratothrips ericae (Haliday)	N			14		1						1		1	2		5			24
Chordeumatida	Haplobainosoma lusitanum Verhoeff	I	4			1	1				7	1		3					6		23
Coleoptera	Aeolus melliculus moreleti Tarnier	I			22																22
Araneae	Savigniorrhipis topographicus Crespo, 2013	E																		21	21
Thysanoptera	Aptinothrips rufus Haliday	I							1			3		1		1	2	2	9		19
Coleoptera	Catops coracinus Kellner	N		4						9						2			3		18
Coleoptera	Coccotrypes carpophagus (Hornung)	I	3				4							6	3	1		1			18
Hemiptera	Heterotoma planicornis (Pallas)	N					7					11									18
Hemiptera	Nysius ericae ericae (Scilling)	N			18																18
Thysanoptera	Hoplothrips ulmi (Fabricius)	I	2	3									1			4	1	6	1		18
Araneae	Mermessus bryantae (Ivie & Barrows)	I					1			1		1				2		5	1	5	16
Coleoptera	Athous pomboi Platia & Borges	E												16							16
Coleoptera	Cercyon haemorrhoidalis (Fabricius)	I		3					1	1						1		3	7		16
Psocoptera	Peripsocus phaeopterus (Stephens)	N					7				1	4				1	3				16
Geophilomorpha	Strigamia crassipes (C.L. Koch)	N	3	1									3		8						15
Hemiptera	Eupteryx azorica Ribaut	E			1		2				1				1		5	4		1	15
Araneae	Meioneta fuscipalpa (C.L. Koch)	I	1		7								6								14
Coleoptera	Anisodactylus binotatus (Fabricius)	I	3				1	4		1		1		2					1	1	14
Coleoptera	Caulotrupis parvus Israelson	E												13							13
Coleoptera	Otiorhynchus rugosostriatus (Goeze)	I			4	2		5	1							1					13
Coleoptera	Pterostichus aterrimus aterrimus (Herbst)	N							8									1		4	13
Hemiptera	Acalypta parvula (Fallén)	N			2		1	3					6				1				13
Lepidoptera	Phlogophora interrupta (Warren)	E						4					8				1				13
Thysanoptera	Isoneurothrips australis Bagnall	I												13							13
Araneae	Pelecopsis parallela (Wider)	I			12																12
Hemiptera	Covariella aegopodii (Scopoli)	I		5						1							6				12
Araneae	Mangora acalypha (Walckenaer)	I	1	1			4		1			1					1	2			11
Coleoptera	Stilbus testaceus (Panzer)	N	1											10							11
Hemiptera	Pseudacaudella rubida (Börner)	N		2				1				1		4	2			1			11
Psocoptera	Peripsocus milleri (Tillyard)	N	1			3	1										6				11
Coleoptera	Cryptamorpha desjardinsii (Guérin-Méneville)	I		7										2				1			10
Lepidoptera	Scoparia semiamplalis Warren	E	1					1		1			1					6			10
Thysanoptera	Aeolothrips gloriosus Bagnall	N				1					1	1						1		6	10
Hemiptera	Rhopalosiphum rufiabdominalis (Sasaki)	I					1		2							2		4			9
Hemiptera	Uroleucon erigeronense (Thomas)	I		1						1				2	1		1	2	1		9
Psocoptera	Ectopsocus strauchi Enderlein	N			1				1			6			1						9
Araneae	Acorigone zebraneus Wunderlich	E																		8	8
Araneae	Theridion melanurum Hahn	I										4		1	3						8
Coleoptera	Acupalpus flavicollis (Sturm)	N				8															8
Coleoptera	Atlantocis gillerforsi Israelson	E	1											3	1	1			2		8
Coleoptera	Phloeosinus gillerforsi Bright	E	2	1								1			1		2	1			8
Coleoptera	Sericoderus lateralis (Gyllenhal)	I	2			1	1			1			1	2							8
Hemiptera	Buchananiella continua (White)	I						5						2						1	8
Hemiptera	Loricula elegantula (Bärensprung)	N	1									7									8
Hemiptera	Nabis pseudoferus ibericus Remane	N					1	1				2						2	2		8
Hemiptera	Polymerus cognatus (Fieber)	N				3			1				3							1	8
Lepidoptera	Oinophila v-flava (Haworth)	I	1	2				1			1	1							2		8
Hemiptera	Myzus cerasi (Fabricius)	I						3					4								7
Psocoptera	Bertkauia lucifuga (Rambur)	N	4												3						7
Thysanoptera	Eurythrips tristis Hood	I					2										1		4		7
Thysanoptera	Hercinothrips bicinctus (Bagnall)	I	3		1		3														7
Araneae	Erigone dentipalpis (Wider)	I			1	3	1	1													6
Coleoptera	Chaetocnema hortensis (Fourcroy)	I												1				5			6
Coleoptera	Typhaea stercorea (Linnaeus)	I												5	1						6
Hemiptera	Acizzia uncatoides (Ferris & Klyver)	I		3					1			2									6
Hemiptera	Aphis craccivora Koch	N		1	2		1							1				1			6
Hemiptera	Brachysteles parvicornis (A. Costa)	N	2	1								2						1			6
Hemiptera	Plinthisus brevipennis (Latreille)	N			3					1				2							6
Thysanoptera	Thrips flavus Schrank	N				5														1	6
Araneae	Macaroeris diligens (Blackwall)	N												5							5
Araneae	Mermessus trilobatus (Emerton)	I					1			1								1	1	1	5
Araneae	Prinerigone vagans (Audouin)	I												1	1			2	1		5
Coleoptera	Cartodere nodifer (Westwood)	I										1				1			2	1	5
Coleoptera	Metophthalmus occidentalis Israelson	E												5							5
Coleoptera	Sitona discoideus Gyllenhal	I		1											1		1	2			5
Hemiptera	Neomyzus circumflexus (Buckton)	I		1									4								5
Hemiptera	Plinthisus minutissimus Fieber	N			5																5
Hemiptera	Saldula palustris (Douglas)	N				2				1					1				1		5
Lepidoptera	Chrysodeixis chalcites (Esper)	N			3									1					1		5
Coleoptera	Agabus godmani Crotch	E								2										2	4
Coleoptera	Calathus lundbladi Colas	E													4						4
Coleoptera	Drouetius borgesi sanctmichaelis Machado	E													4						4
Hemiptera	Anoecia corni (Fabricius)	I									2						1		1		4
Hemiptera	Nysius atlantidum Horváth	E			1								2	1							4
Lepidoptera	Opogona sacchari (Bojer)	I	1	1								1					1				4
Araneae	Oecobius navus Blackwall	I	1															1	1		3
Coleoptera	Dryops algiricus Lucas	N			1	1				1											3
Coleoptera	Dryops luridus (Erichson)	N	2																	1	3
Hemiptera	Geotomus punctulatus (Costa)	N												3							3
Hemiptera	Philaenus spumarius (L.)	I	1							2											3
Lepidoptera	Agrotis ipsilon (Hufnagel)	N																3			3
Lepidoptera	Caloptilia schinella (Walsingham)	I		2												1					3
Lepidoptera	Xestia c-nigrum (Linnaeus)	N											2		1						3
Araneae	Canariphantes junipericola Crespo & Bosmans	E						1					1								2
Araneae	Lessertia dentichelis (Simon)	I								2											2
Araneae	Neottiura bimaculata (Linnaeus)	I										2									2
Araneae	Orchestina furcillata Wunderlich	E	2																		2
Araneae	Rhomphaea nasica (Simon)	I	2																		2
Coleoptera	Agabus bipustulatus (Linnaeus)	N											2								2
Coleoptera	Amara aenea (De Geer)	I		1														1			2
Coleoptera	Aspidapion radiolus chalybeipenne (Wollaston)	N												1	1						2
Coleoptera	Cartodere bifasciata Reitter	I														1			1		2
Coleoptera	Cartodere satelles (Blackburn)	I												1				1			2
Coleoptera	Drouetius borgesi centralis Machado	E															2				2
Coleoptera	Gymnetron pascuorum (Gyllenhal)	I												2							2
Coleoptera	Laemostenus complanatus Dejean	I						1									1				2
Coleoptera	Meligethes aeneus (Fabricius)	I										1						1			2
Coleoptera	Pseudophloeophagus aenopiceus (Boheman)	N												2							2
Coleoptera	Pseudoophonus rufipes (DeGeer)	I												2							2
Coleoptera	Xyleborinus alni Nijima	I	2																		2
Hemiptera	Acyrthosiphon pisum Harris	N								1			1								2
Hemiptera	Aulacorthum solani (Kaltenbach)	N		1	1																2
Hemiptera	Dysaphis plantaginea (Passerini)	I			1											1					2
Hemiptera	Empicoris rubromaculatus (Blackburn)	I	1															1			2
Hemiptera	Loricula coleoptrata (Fallén)	N	2																		2
Hemiptera	Microplax plagiata (Fieber)	N												2							2
Hemiptera	Nezara viridula (Linnaeus)	I									1			1							2
Hemiptera	Polymerus vulneratus (Panzer)	N										2									2
Hemiptera	Rhopalosiphum padi (Linnaeus)	I		1														1			2
Lepidoptera	Mesapamea storai (Rebel)	E														1				1	2
Lepidoptera	Micrurapteryx bistrigella (Rebel)	E		1				1													2
Orthoptera	Gryllus bimaculatus (De Geer)	I												2							2
Psocoptera	Peripsocus subfasciatus (Rambur)	N			1													1			2
Thysanoptera	Nesothrips propinquus (Bagnall)	I		1										1							2
Thysanoptera	Thrips atratus Haliday	N		1													1				2
Araneae	Agyneta rugosa Wunderlich	E			1																1
Araneae	Altella lucida (Simon)	I																		1	1
Araneae	Clubiona genevensis L. Koch	I										1									1
Araneae	Mermessus fradeorum (Berland)	I								1											1
Araneae	Neriene clathrata (Sundevall)	I														1					1
Araneae	Pseudeuophrys vafra (Blackwall)	I								1											1
Coleoptera	Acupalpus dubius Schilsky	N															1				1
Coleoptera	Anobium punctatum (De Geer)	I														1					1
Coleoptera	Carpophilus fumatus (Boheman)	I											1								1
Coleoptera	Carpophilus hemipterus (Linnaeus)	I												1							1
Coleoptera	Clitostethus arcuatus (Rossi)	I																	1		1
Coleoptera	Coccinella undecimpunctata undecimpunctata Linnaeus	I														1					1
Coleoptera	Crotchiella brachyptera Israelson	E										1									1
Coleoptera	Epitrix hirtipennis Melsham	I																1			1
Coleoptera	Hydroporus guernei Régimbart	E											1								1
Coleoptera	Lindorus lophanthae (Blaisdell)	I															1				1
Coleoptera	Onthophagus taurus (Schreber)	I																1			1
Coleoptera	Orthochaetes insignis (Aubé)	N			1																1
Coleoptera	Otiorhynchus cribricollis Gyllenhal	I			1																1
Coleoptera	Psylliodes marcidus (Illiger)	N			1																1
Coleoptera	Rhizophagus ferrugineus (Paykull)	I																	1		1
Coleoptera	Rodolia cardinalis (Mulsant)	I												1							1
Coleoptera	Sitophilus oryzae (Linnaeus)	I						1													1
Coleoptera	Stenolophus teutonus (Schrank)	N						1													1
Ephemeroptera	Cloeon dipterum (Linnaeus)	N																1			1
Hemiptera	Amphorophora rubi (Kaltenbach) sensu latiore	N						1													1
Hemiptera	Beosus maritimus (Scopoli)	N					1														1
Hemiptera	Cacopsylla pulchella (Low)	I							1												1
Hemiptera	Cixius azoricus azoropicoi Remane & Ashe	E							1												1
Hemiptera	Closterotomus norwegicus (Gmelin)	N												1							1
Hemiptera	Gastrodes grossipes grossipes (De Geer)	I																	1		1
Hemiptera	Heterogaster urticae (Fabricius)	N																1			1
Hemiptera	Longiunguis luzulella Hille Ris Lambers	I																		1	1
Hemiptera	Opsius stactogallus Fieber	N											1								1
Hemiptera	Orius laevigatus laevigatus (Fieber)	N									1										1
Lepidoptera	Autographa gamma (Linnaeus)	N												1							1
Lepidoptera	Brachmia infuscatella Rebel	E												1							1
Lepidoptera	Hipparchia azorina occidentalis (Sousa)	E											1								1
Lepidoptera	Hipparchia miguelensis (Le Cerf)	E													1						1
Lepidoptera	Phyllocnistis citrella Stainton	I																1			1
Orthoptera	Conocephalus chavesi (Bolivar)	E						1													1
Psocoptera	Ectopsocus pumilis (Banks)	I												1							1
Psocoptera	Lepinotus reticulatus Enderlein	I																	1		1
Thysanoptera	Aeolothrips collaris Priesner	N		1																	1
Thysanoptera	Hoplandrothrips consobrinus (Knechtel)	I															1				1
